# Supplementary material
Source: PubMed Central journal article supplement (PMC3988686)

# C–H Methylation of Heteroarenes Inspired by Radical SAM Methyl Transferase

Jinghan Gui<sup>†,§</sup>, Qianghui Zhou<sup>†,§</sup>, Chung-Mao Pan<sup>†</sup>, Yuki Yabe<sup>†</sup>, Aaron C. Burns<sup>‡</sup>, Michael R. Collins<sup>‡</sup>, Martha A. Ornelas<sup>‡</sup>, Yoshihiro Ishihara<sup>†</sup>  
and Phil S. Baran<sup>†,\*</sup>

<sup>†</sup>Department of Chemistry, The Scripps Research Institute, 10550 North Torrey Pines Road, La Jolla, California 92037

<sup>‡</sup>Department of Chemistry, Pfizer Pharmaceuticals, La Jolla Laboratories, 10770 Science Center Drive, La Jolla, California 92121

## Supporting Information

### Part 2: NMR Spectra of New Compounds

#### Table of Contents

|                                                                                      |      |
|--------------------------------------------------------------------------------------|------|
| 1. NMR Spectra of PSMS ( <b>6</b> ) .....                                            | S-2  |
| 2. NMR Spectra of (phenylsulfonyl)methylation products <b>7b</b> to <b>32b</b> ..... | S-4  |
| 3. NMR Spectra of biologically relevant products <b>L-33b</b> to <b>36b</b> .....    | S-61 |
| 4. NMR Spectra of methylated products <b>7c</b> to <b>29c</b> .....                  | S-69 |
| 5. NMR Spectra of phenylsulfonylmethyl derived products <b>7d</b> to <b>7f</b> ..... | S-85 |
| 6. NMR Spectra of biologically important products <b>37c</b> to <b>39c</b> .....     | S-93 |

# 1. NMR spectra of PSMS

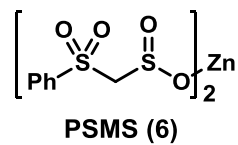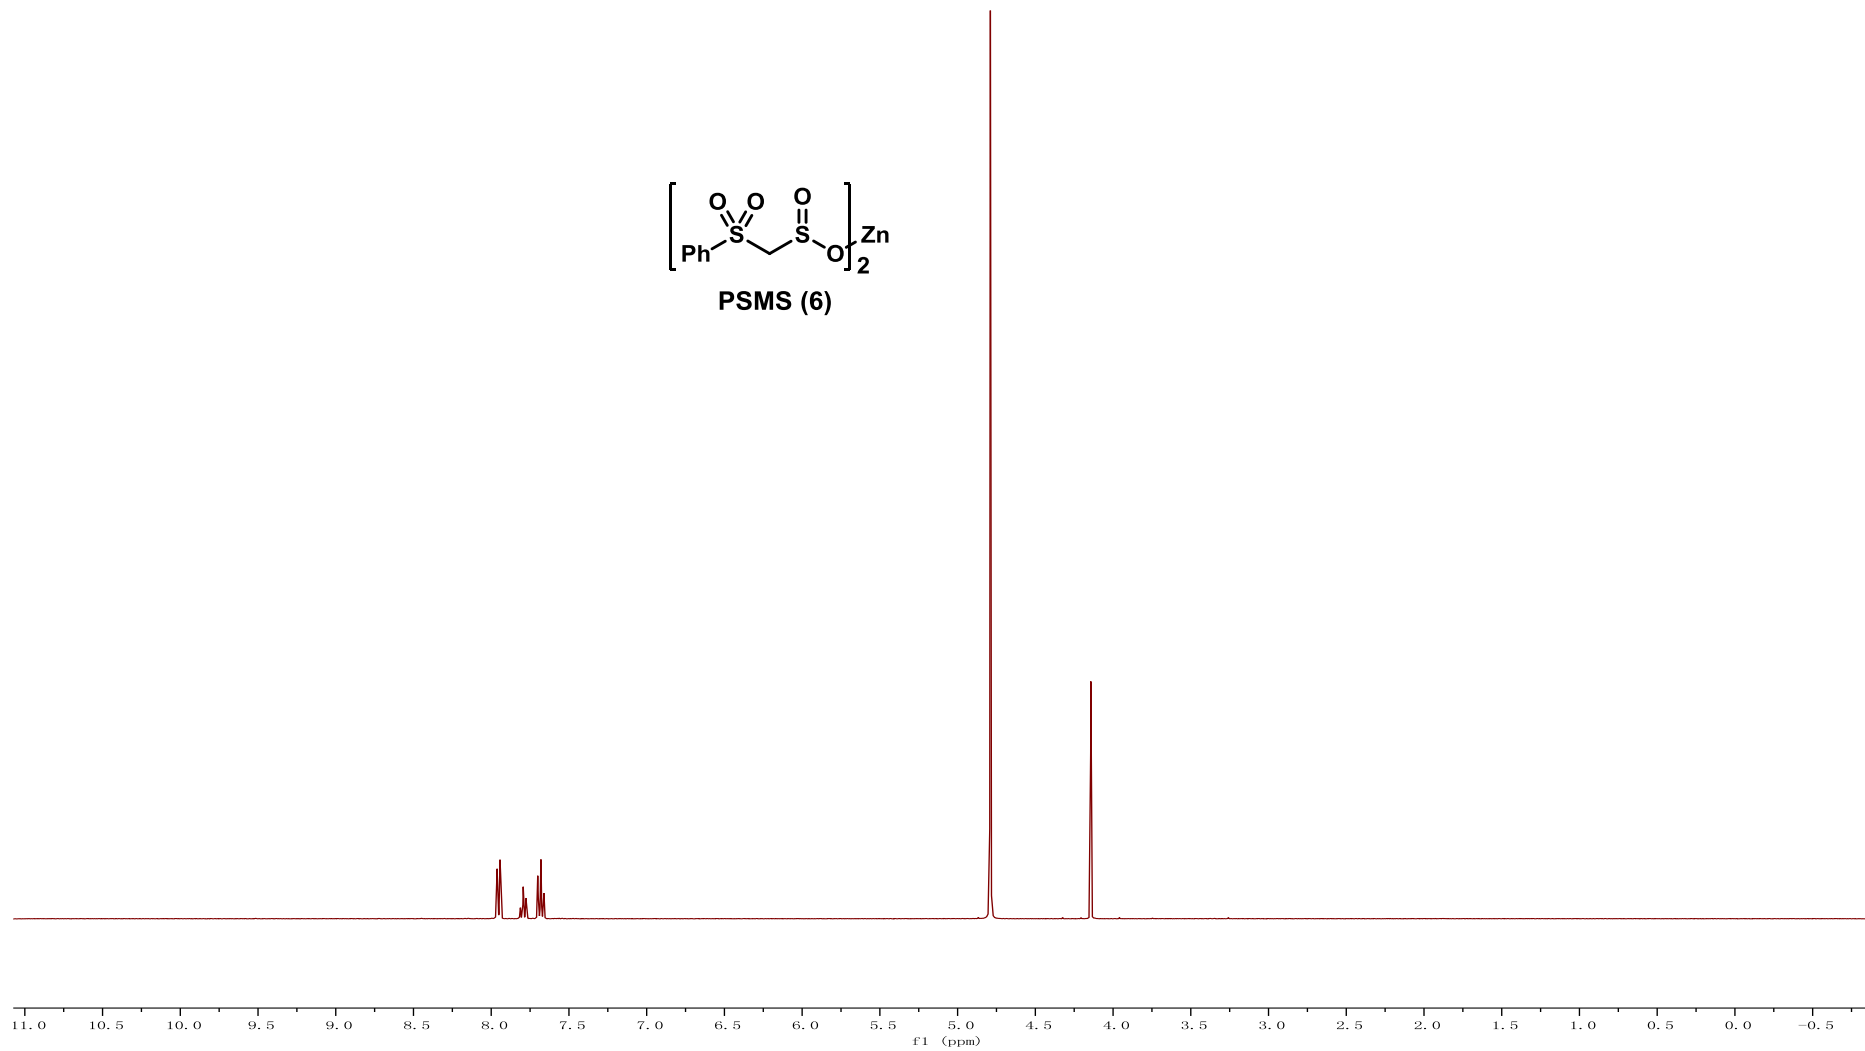

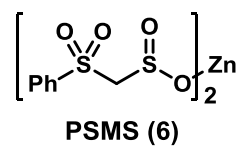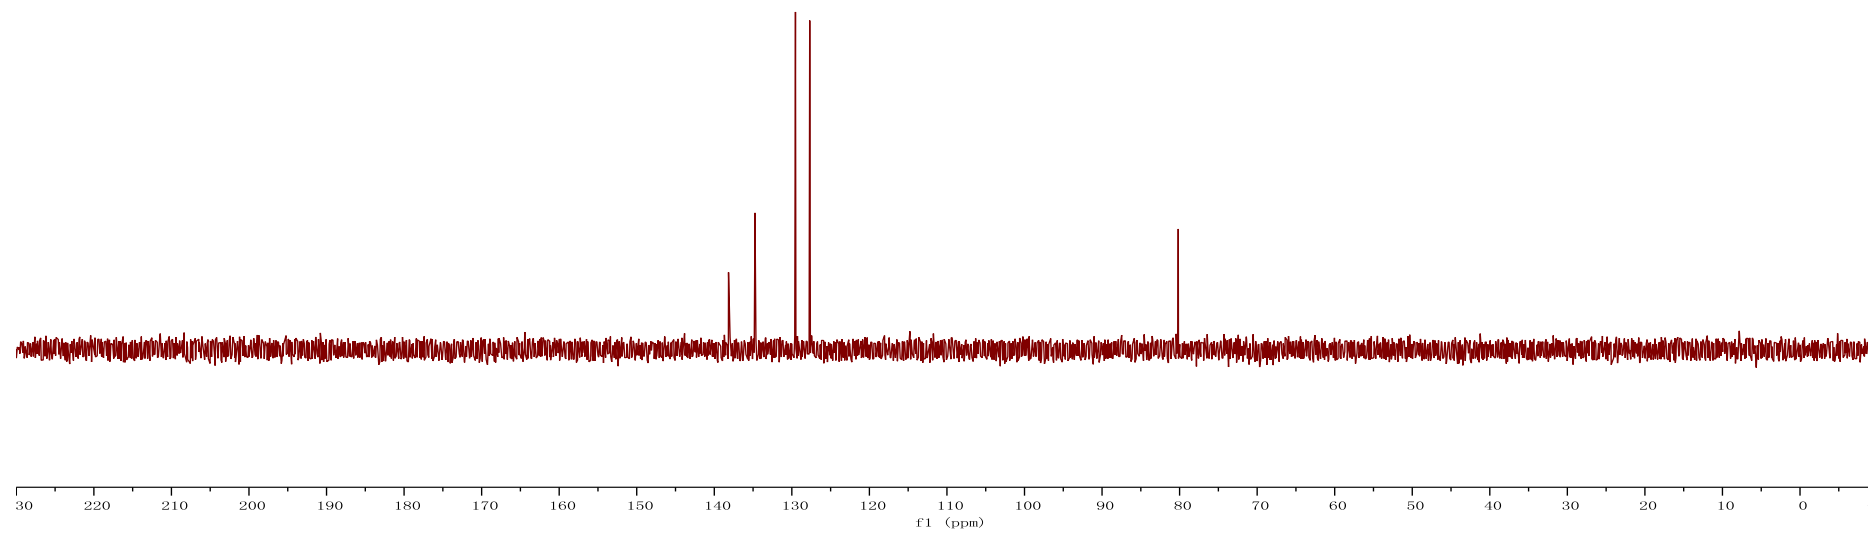

## 2. NMR Spectra of (phenylsulfonyl)methylation products 7b to 32b

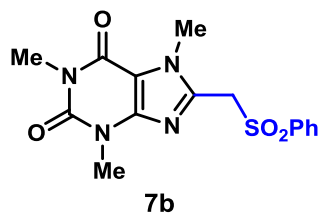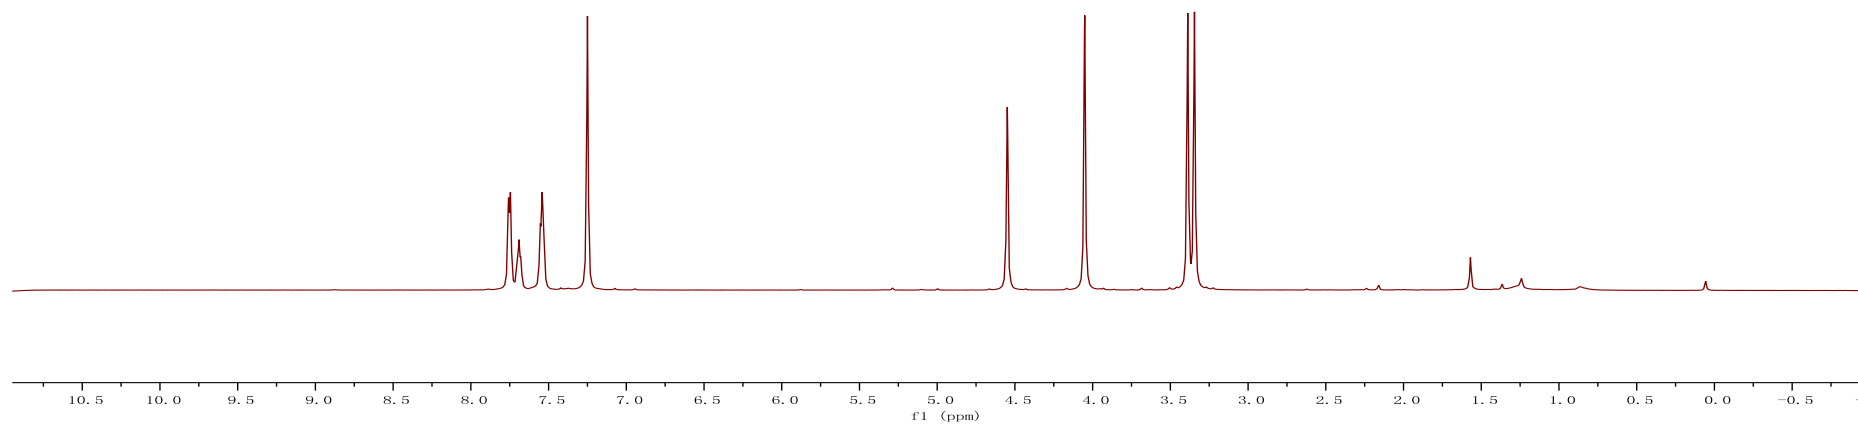

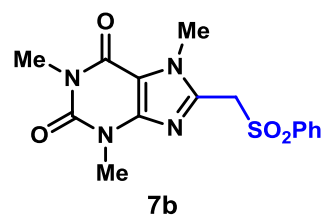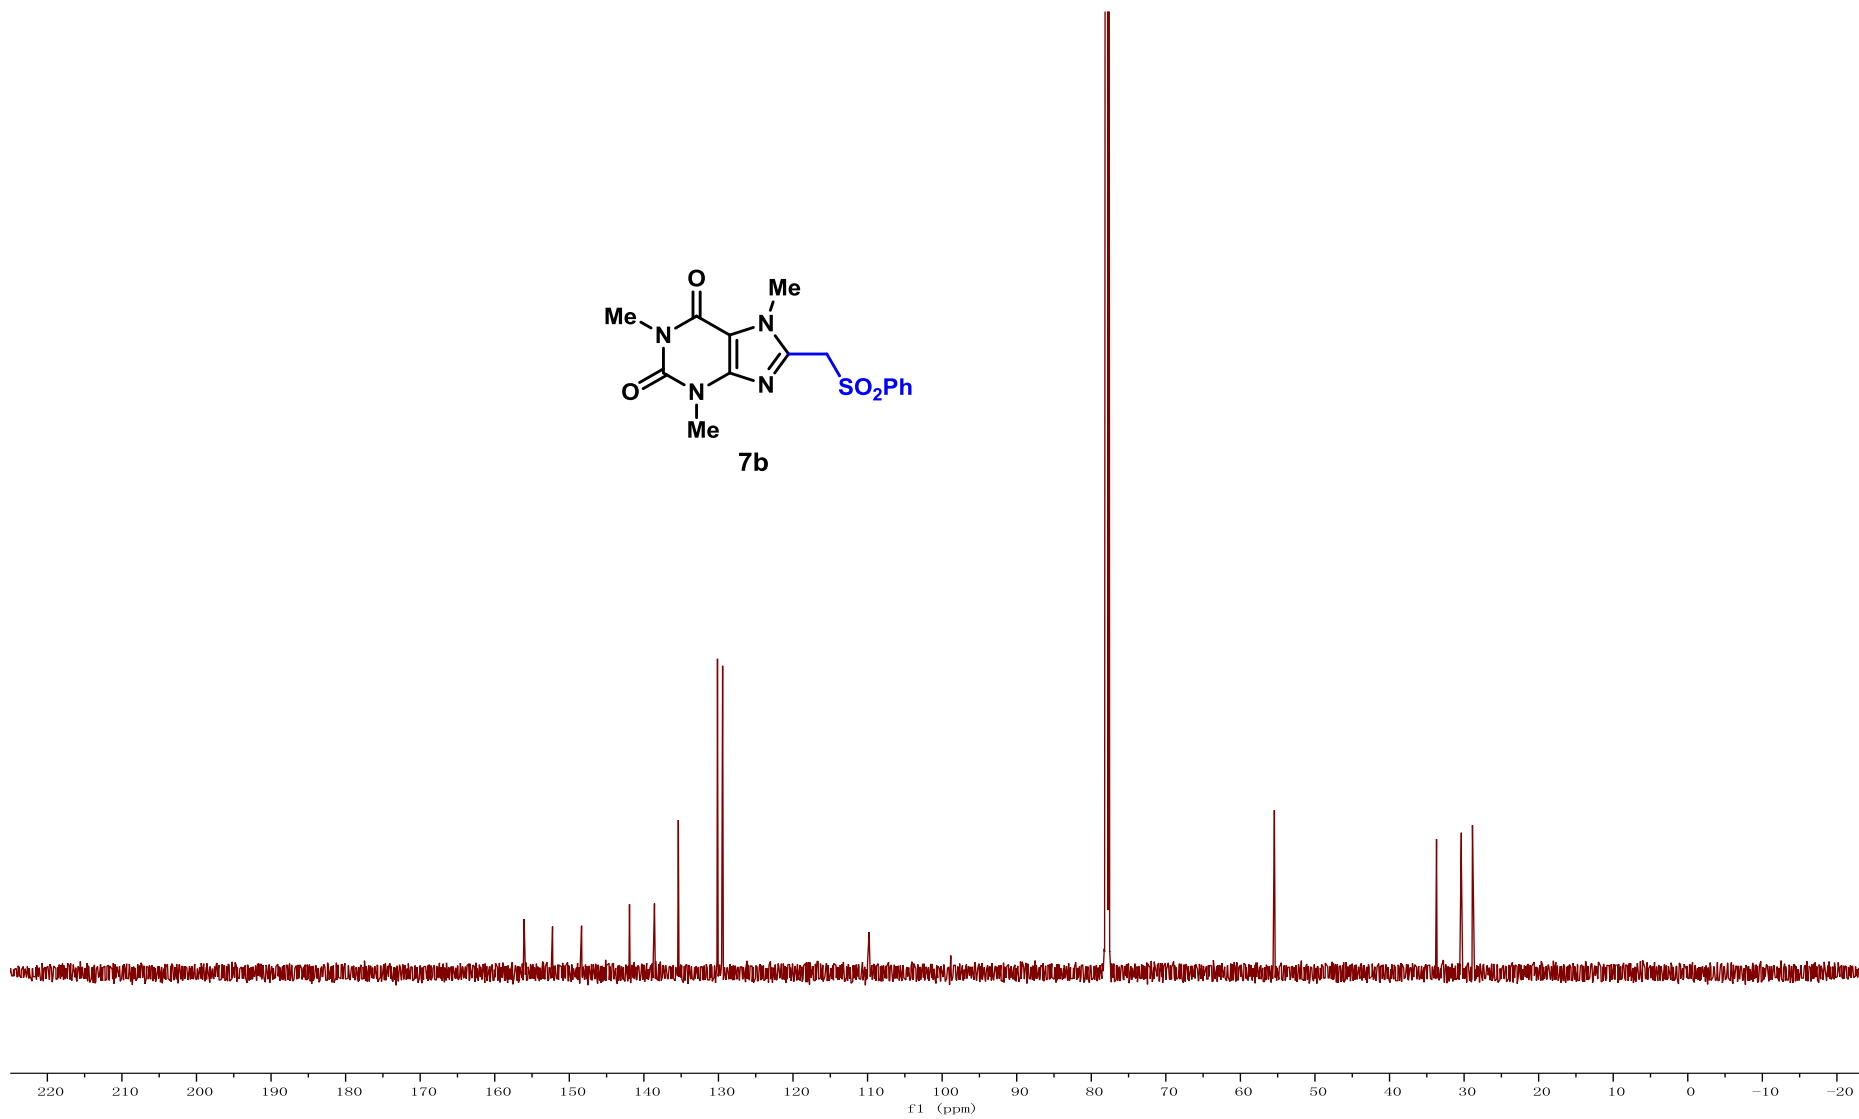

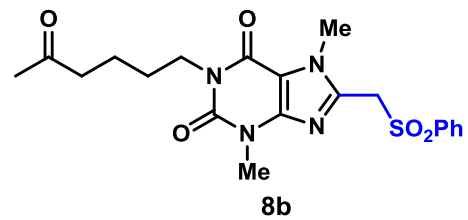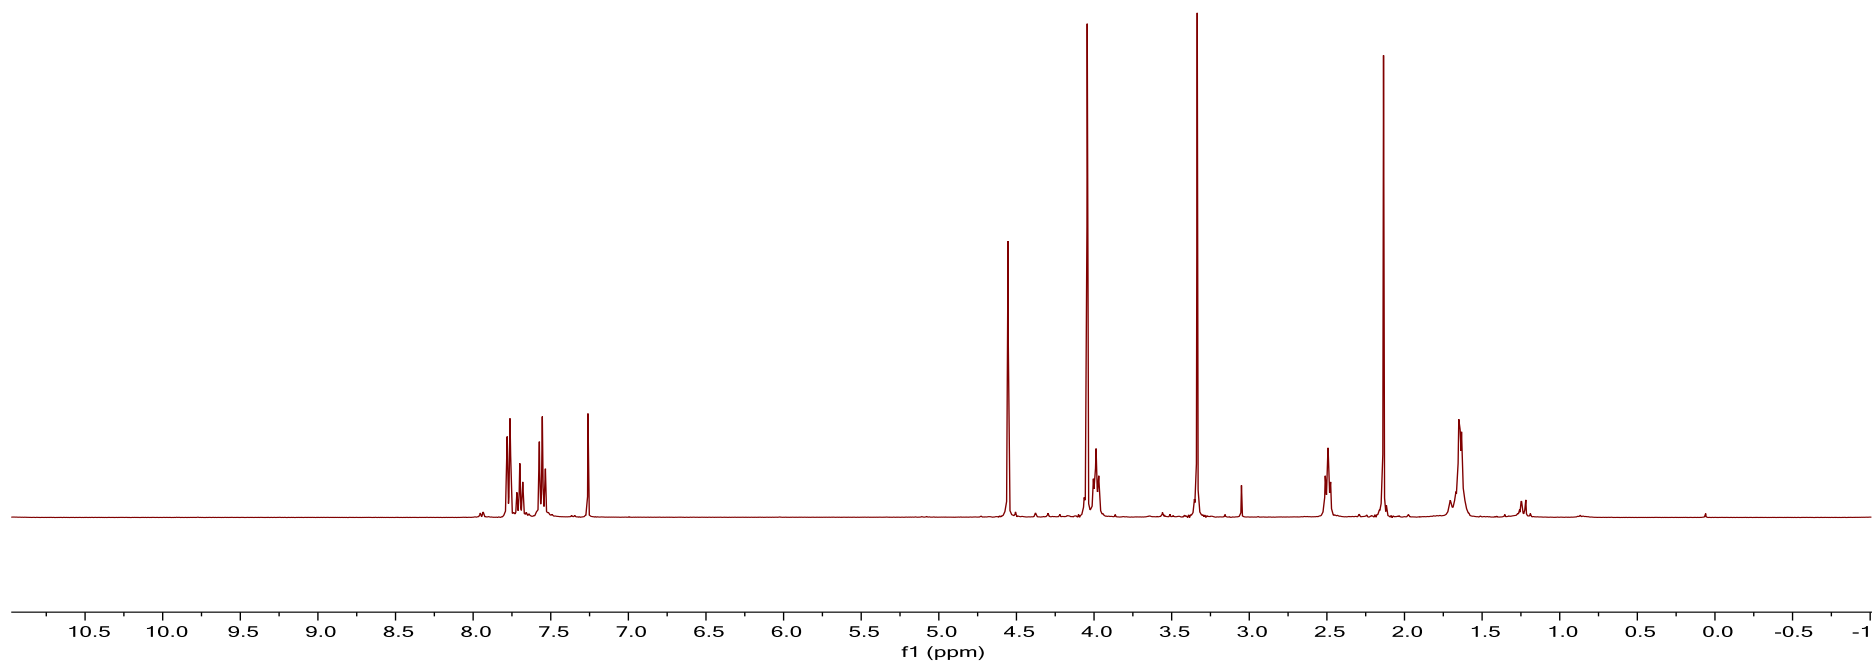

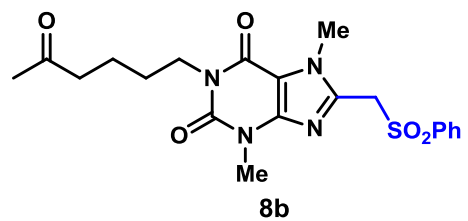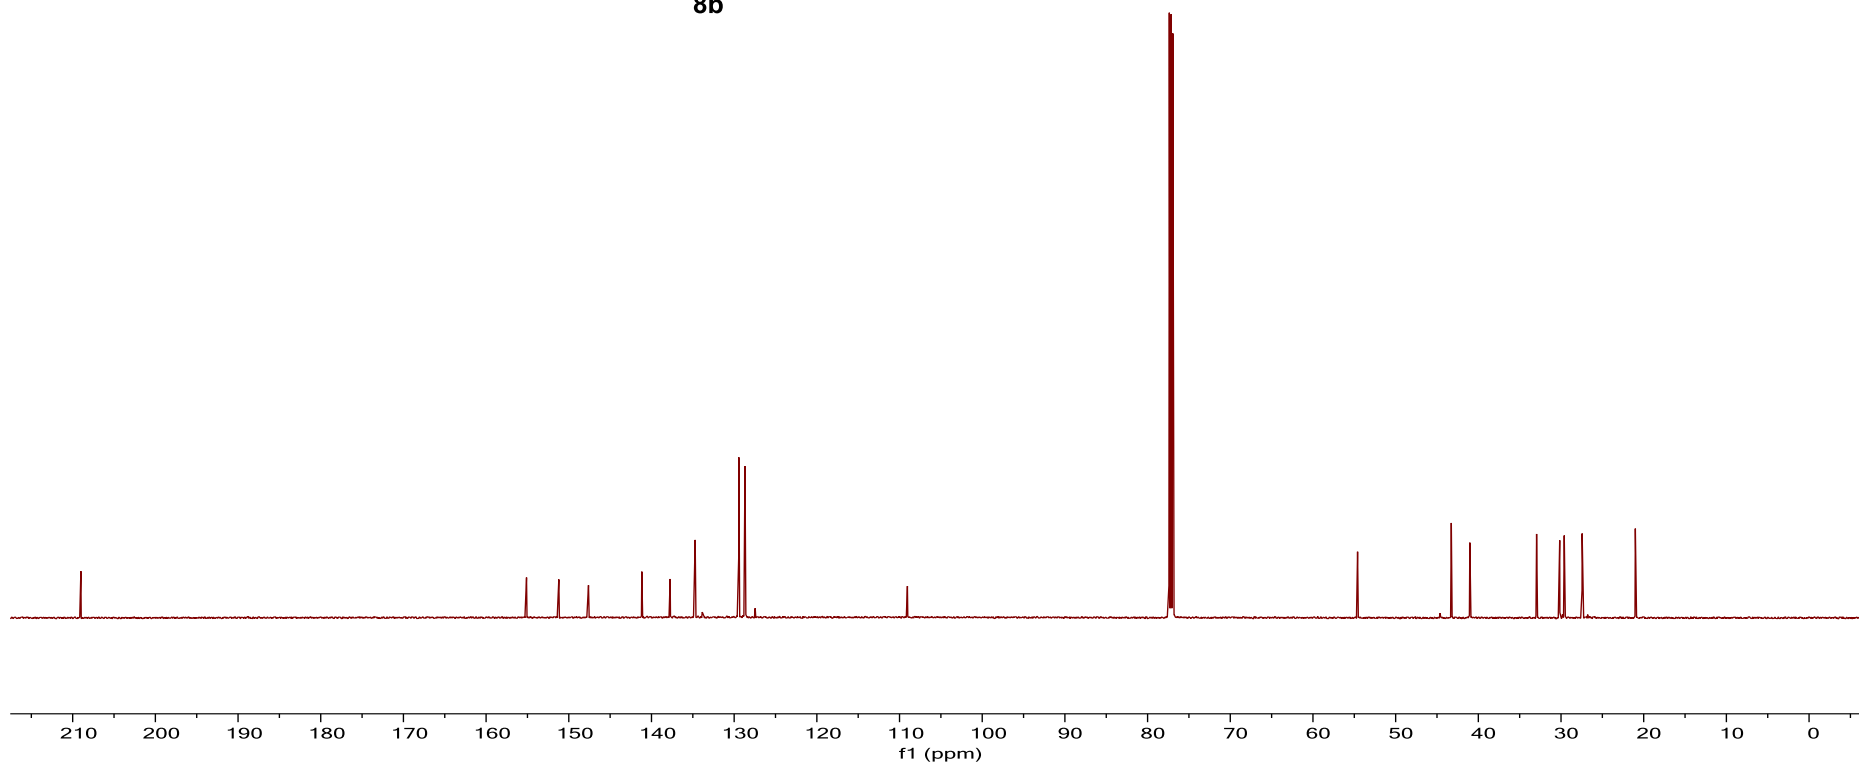

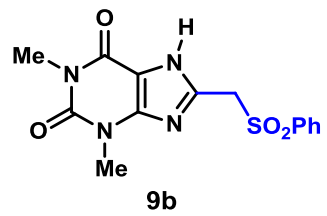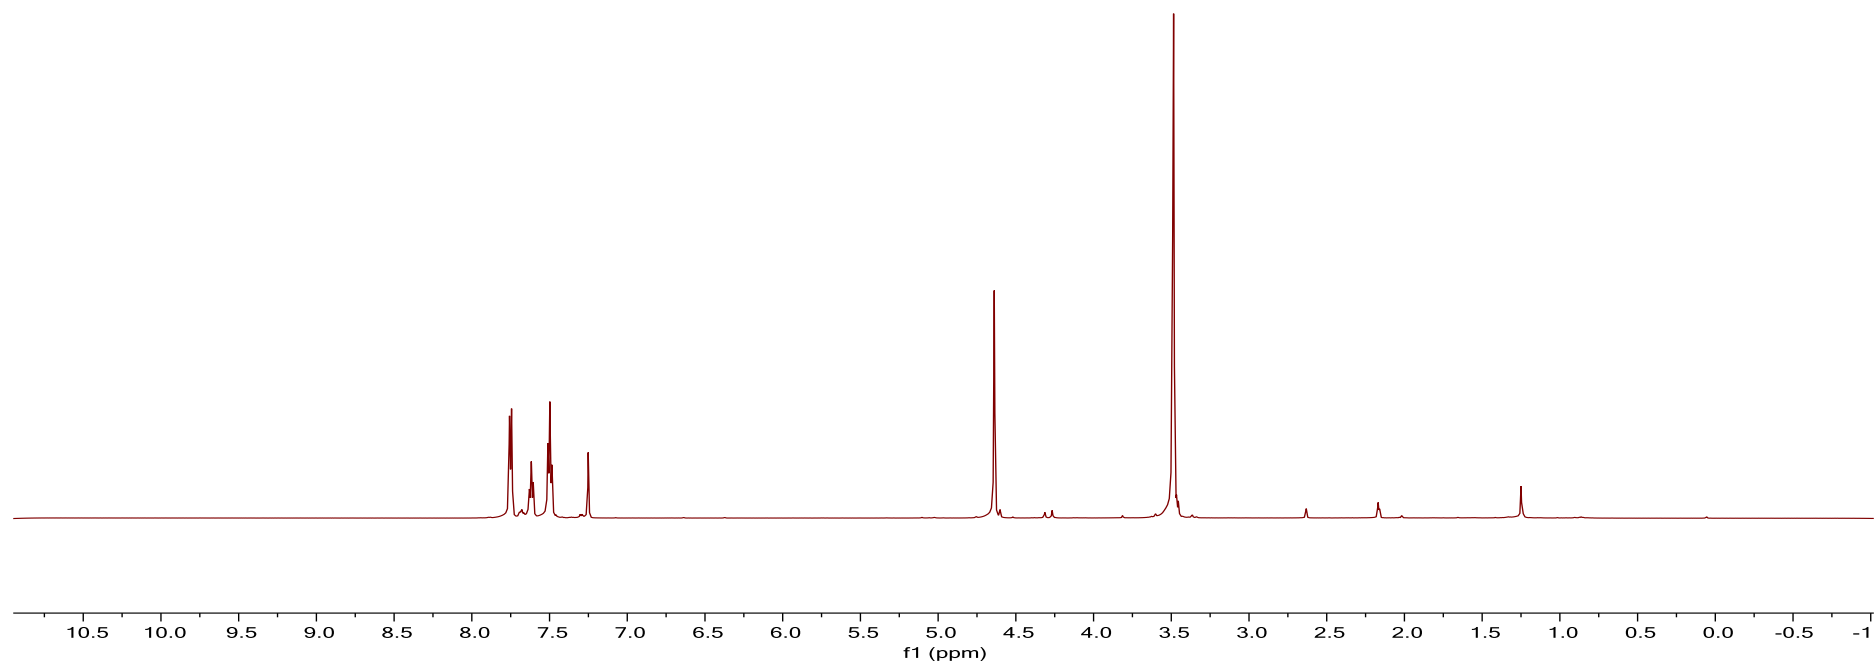



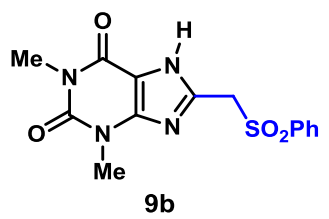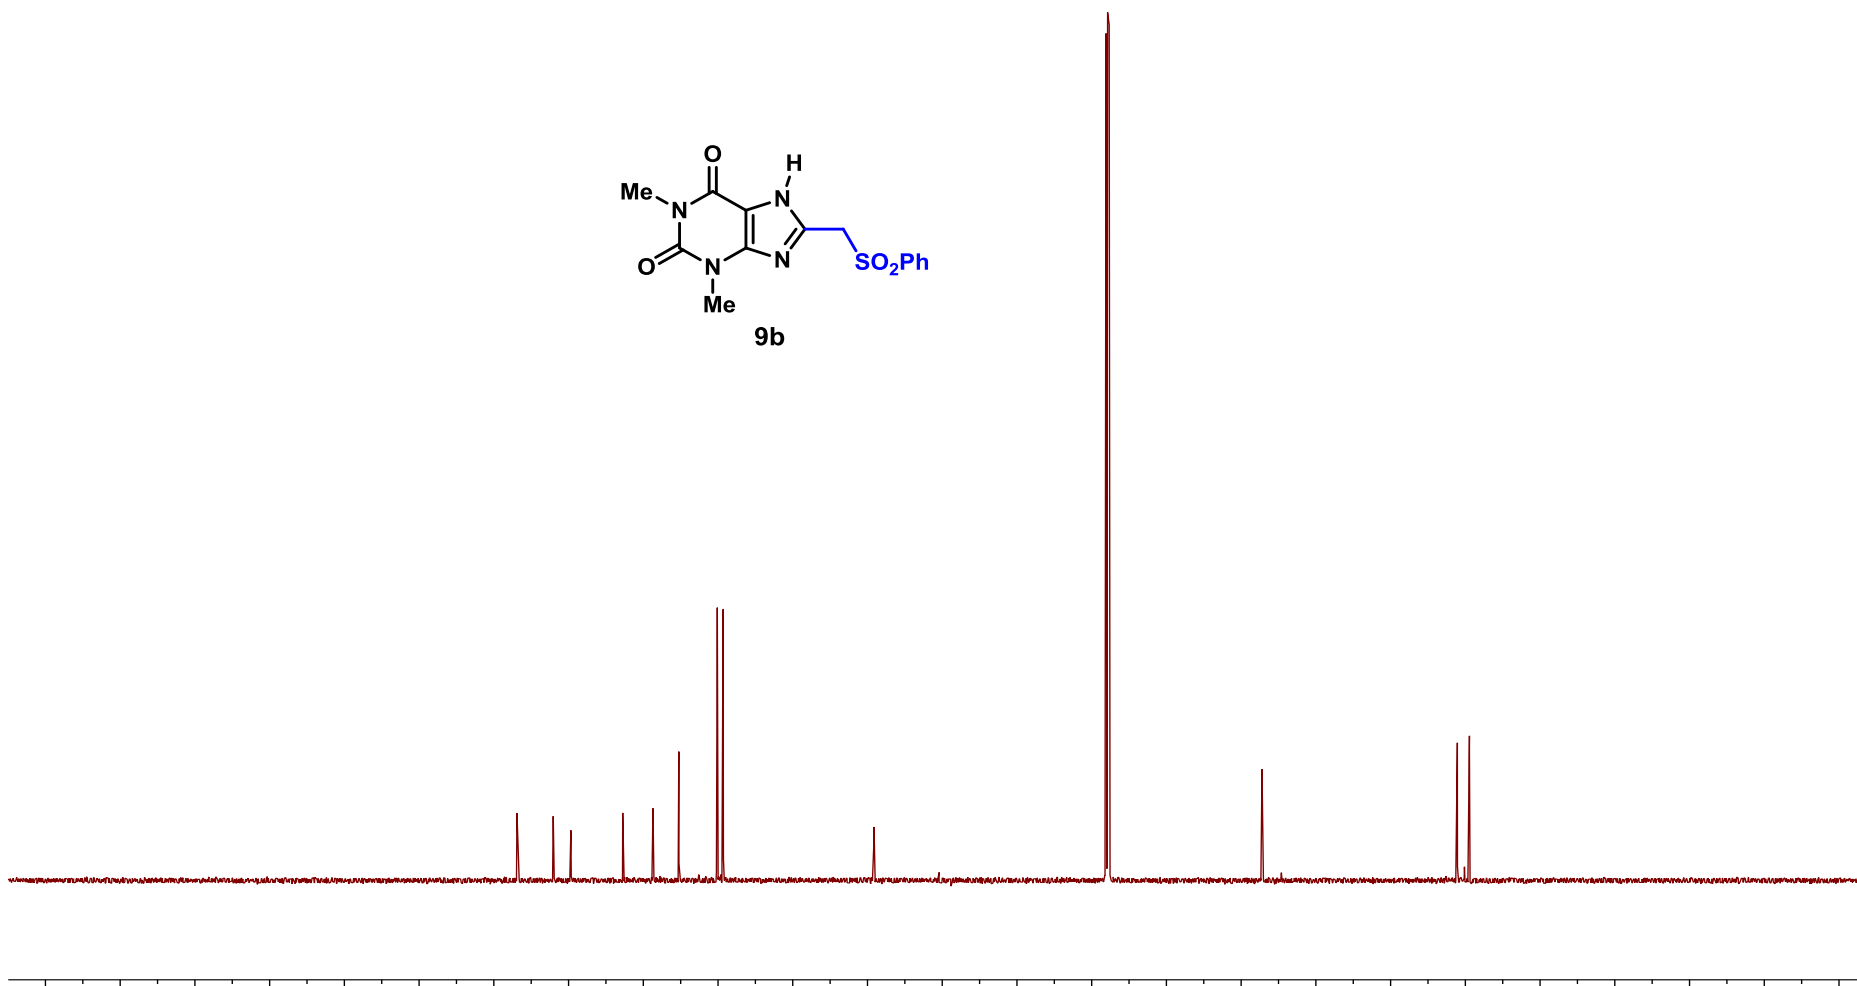

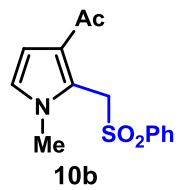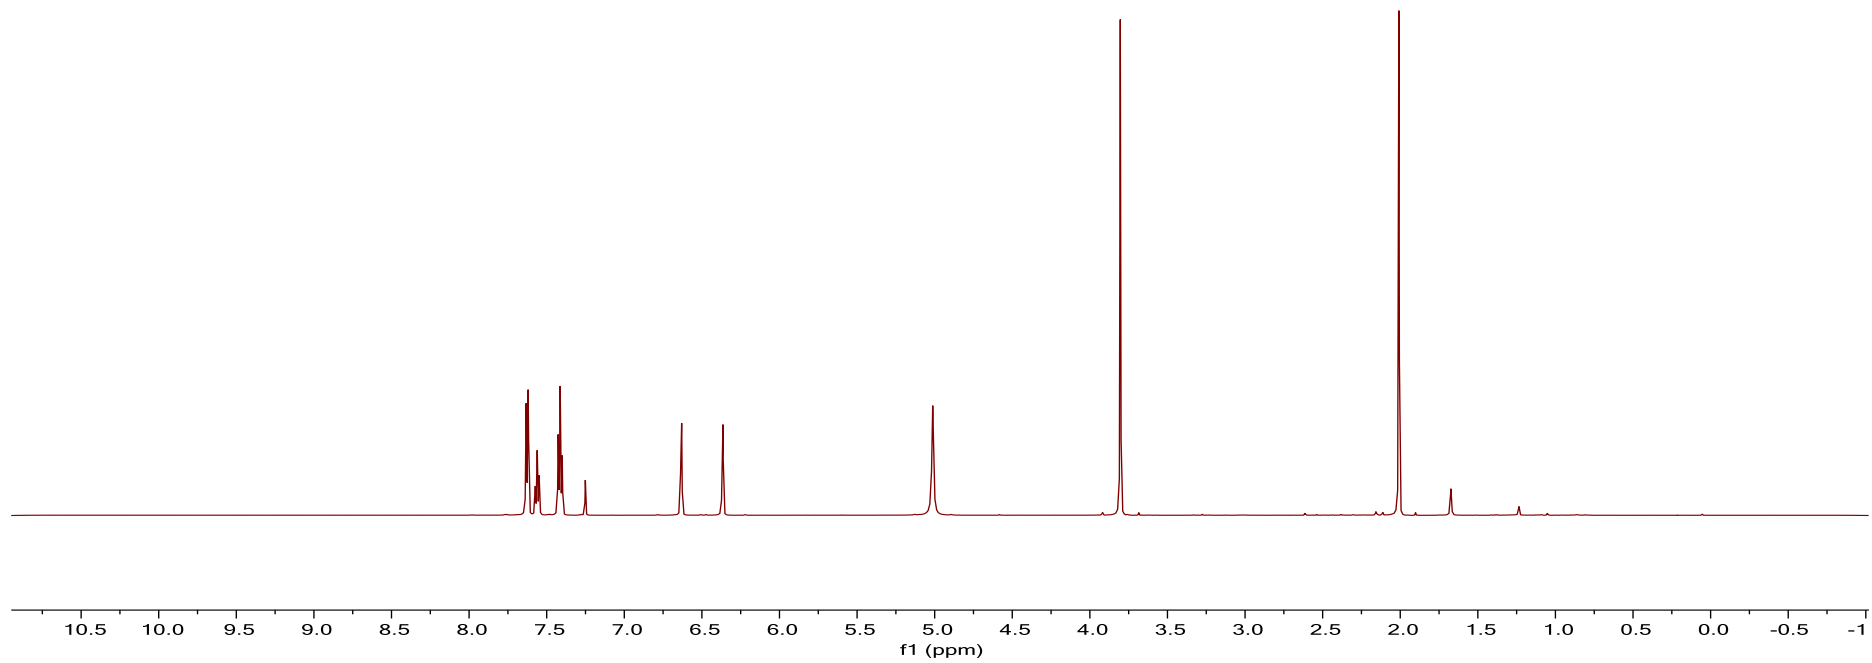

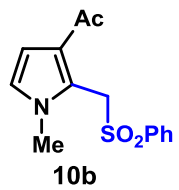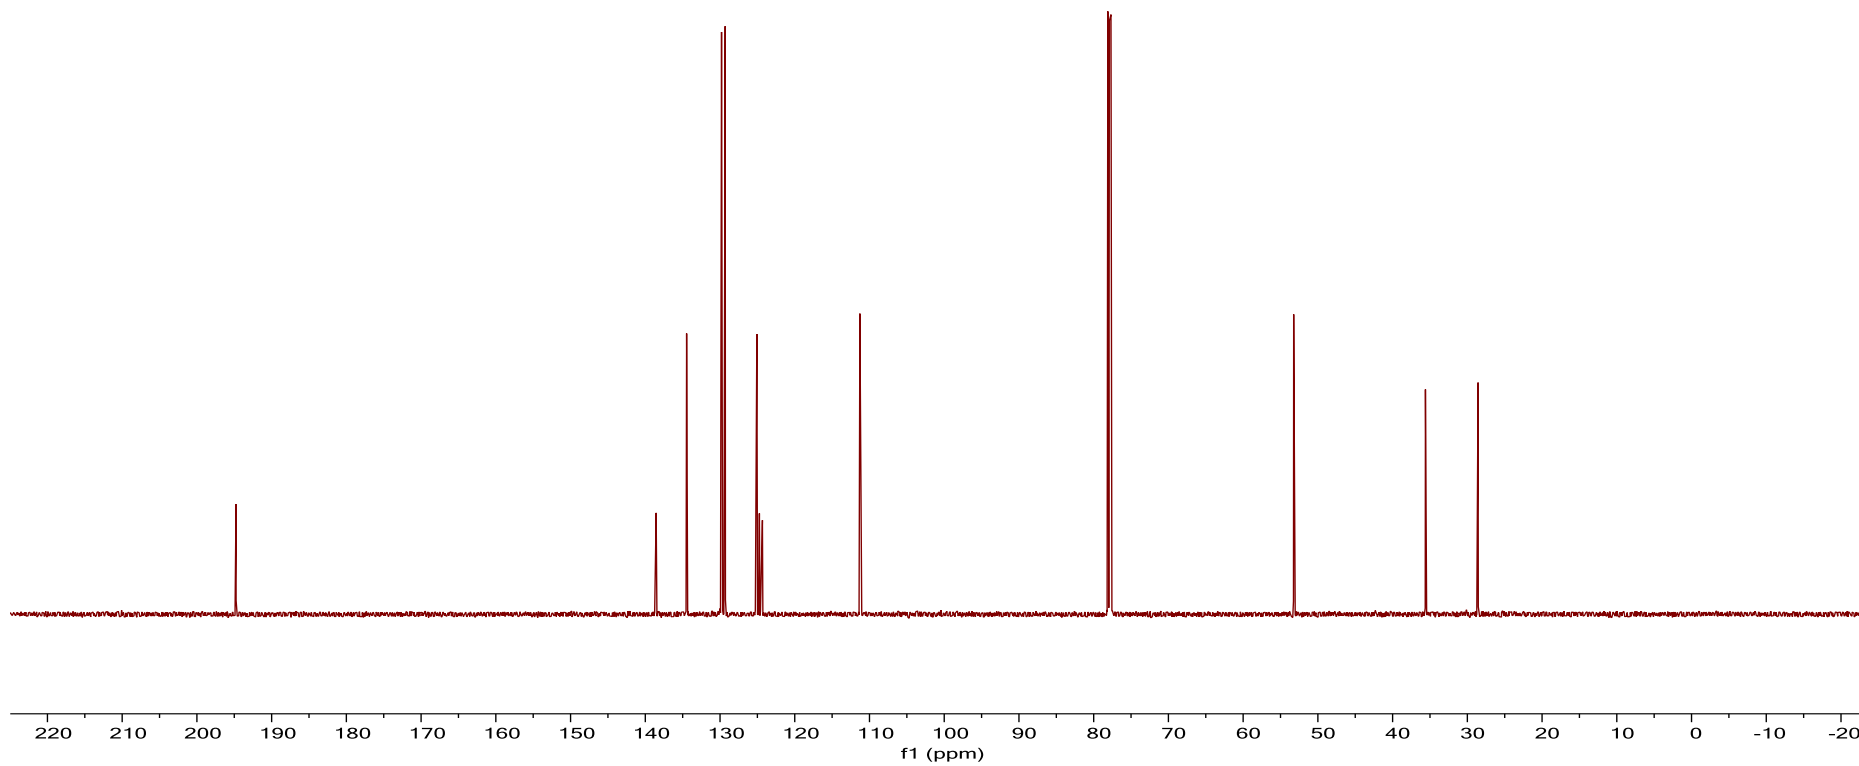

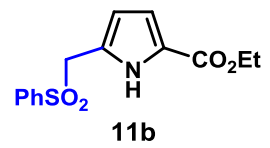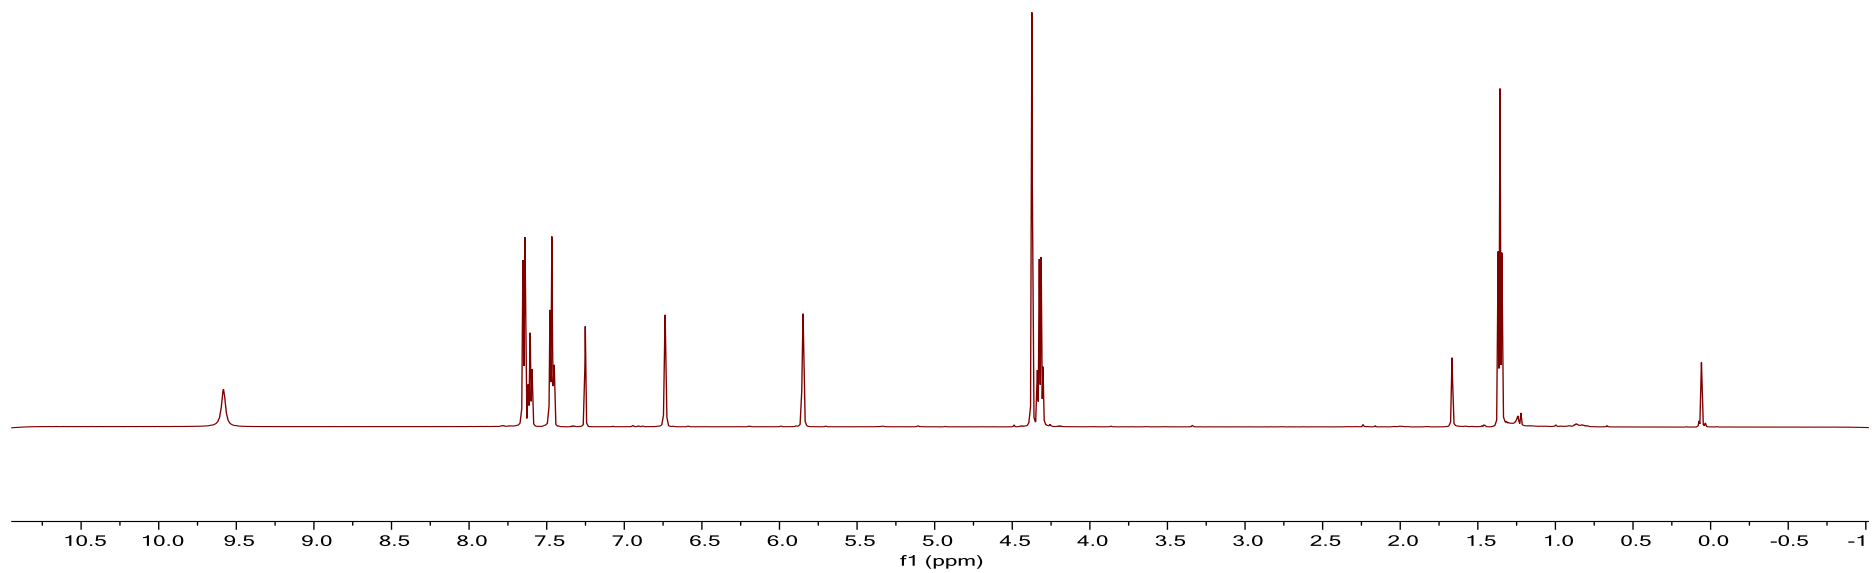

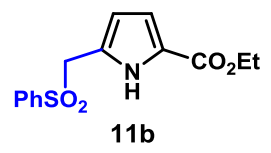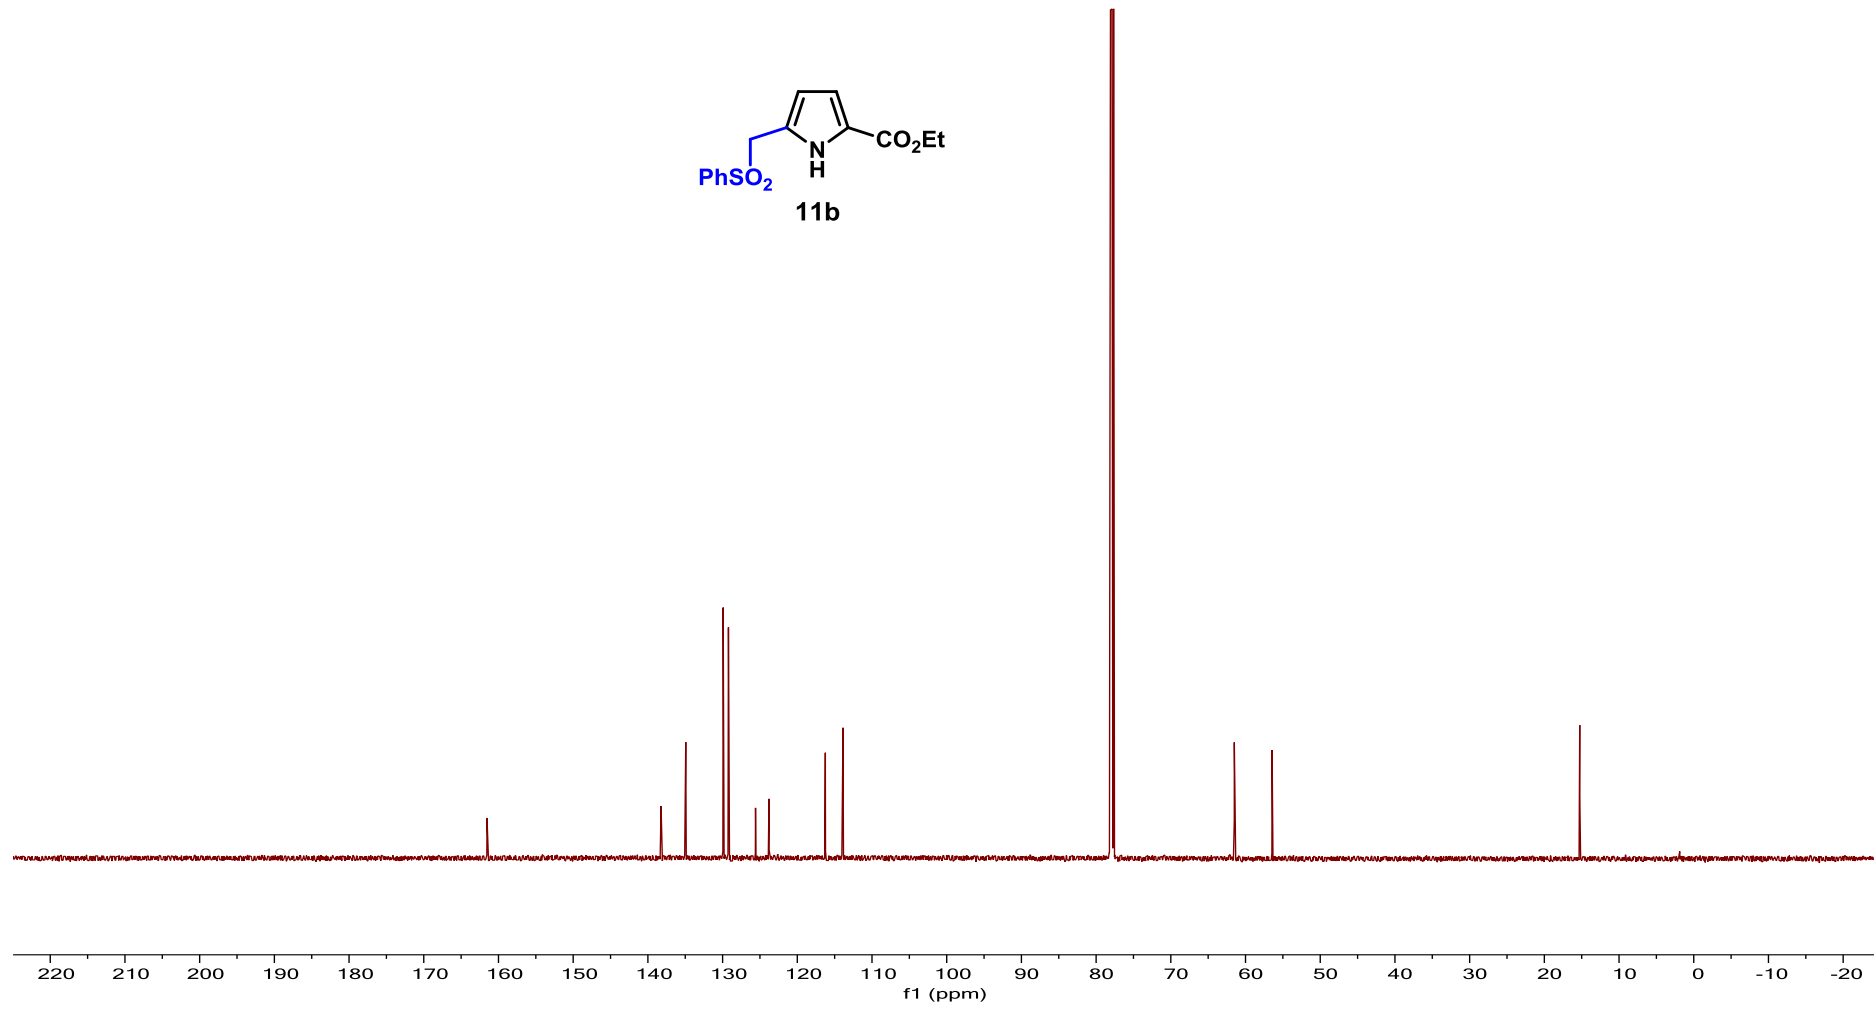

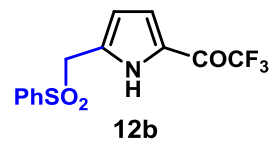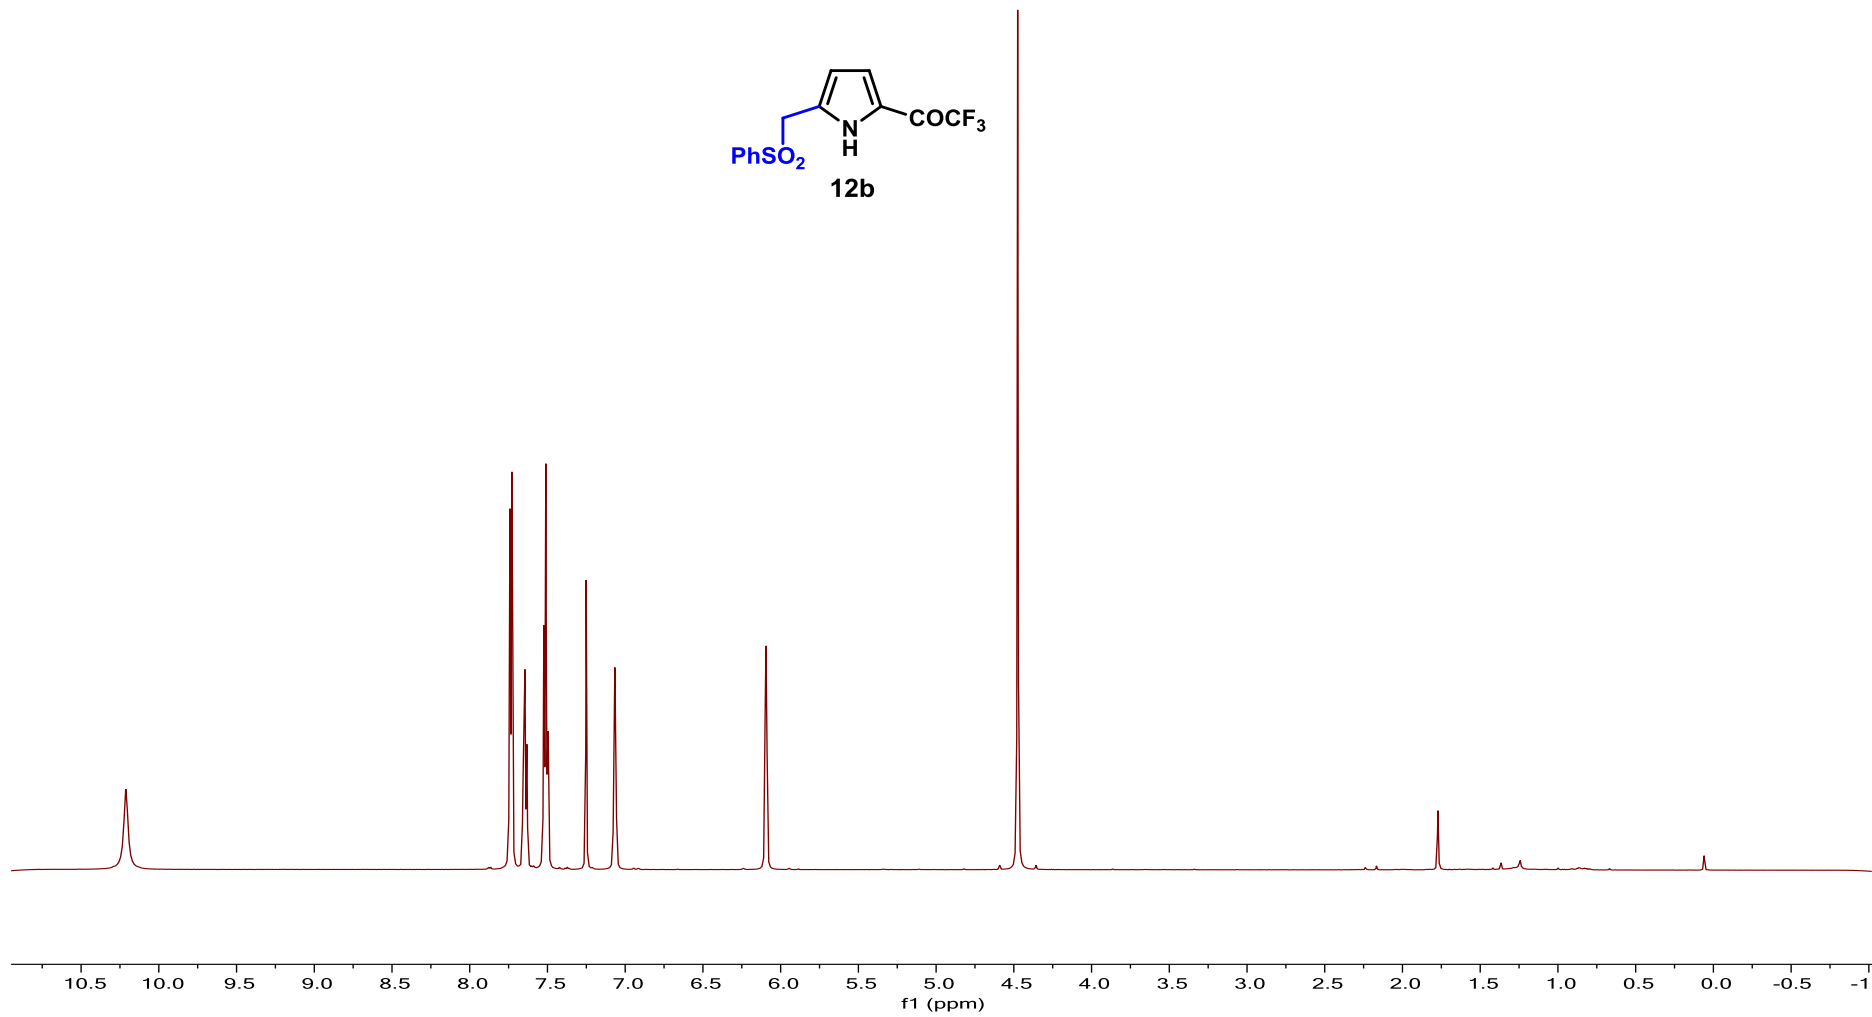

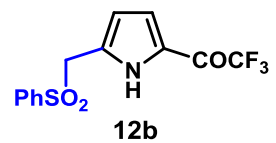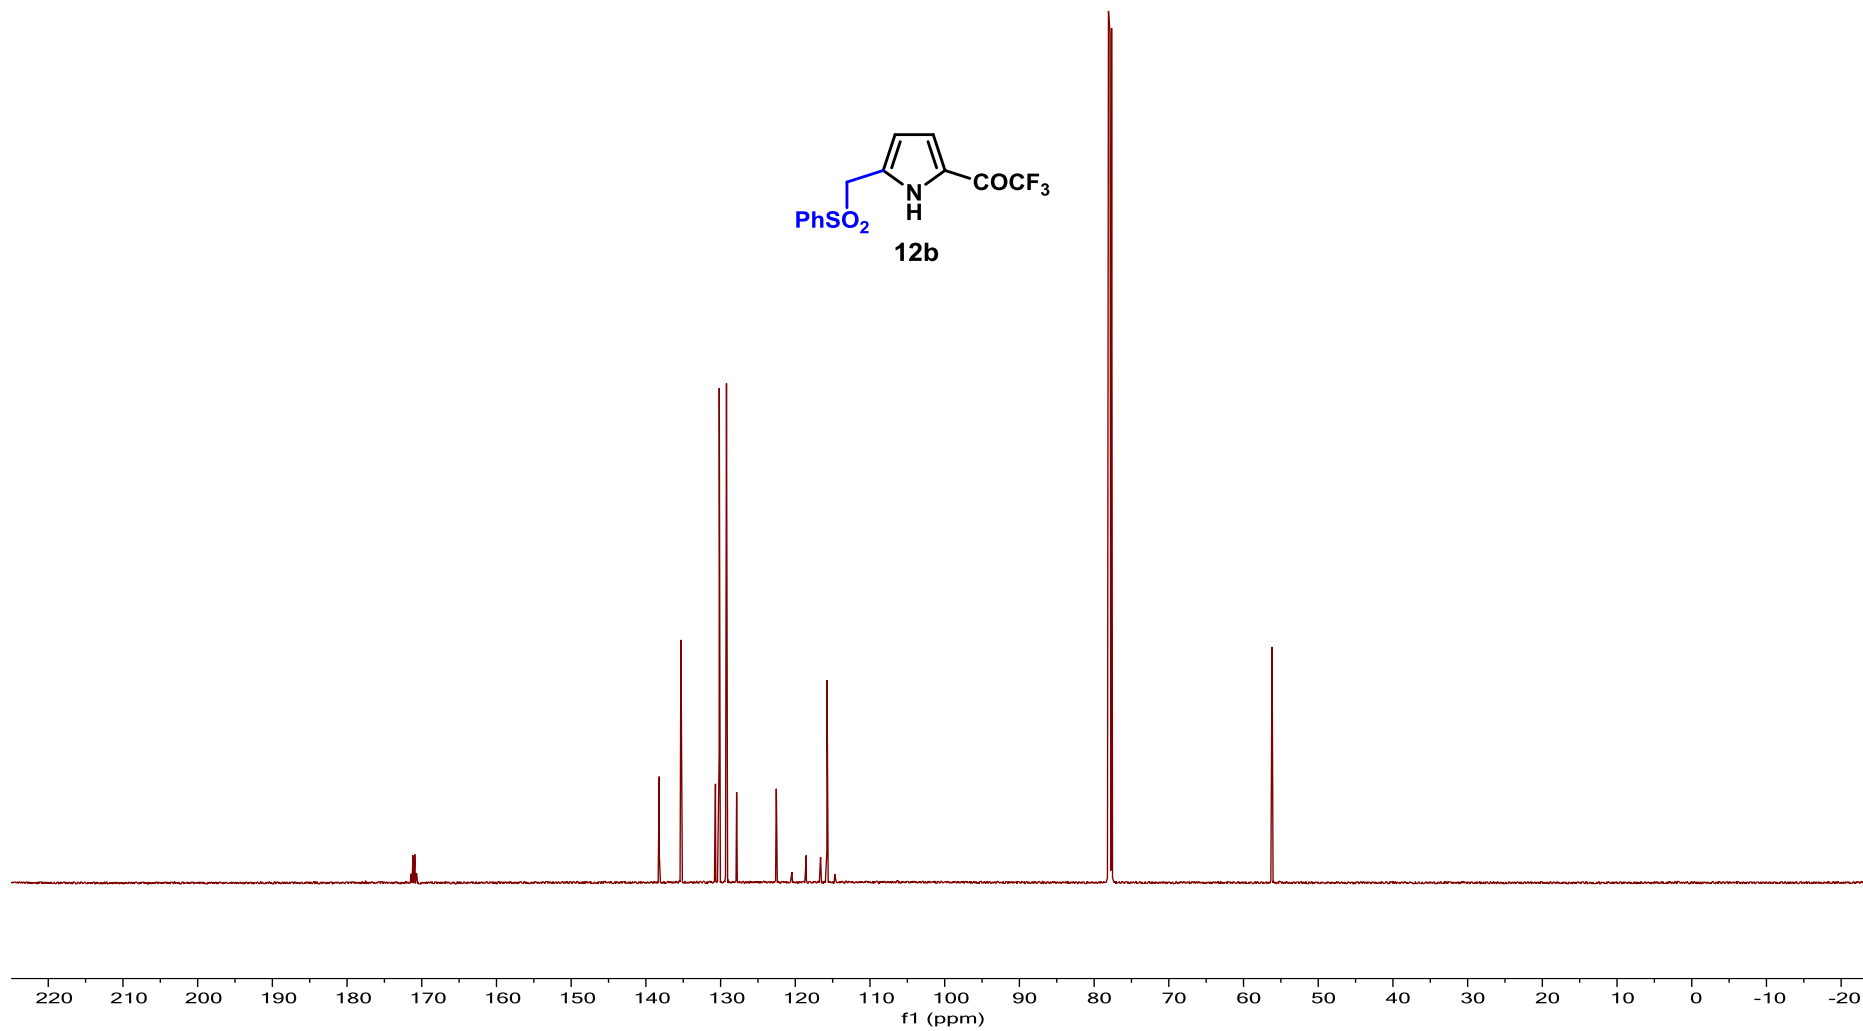

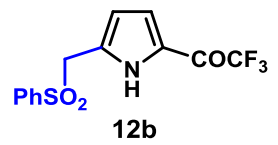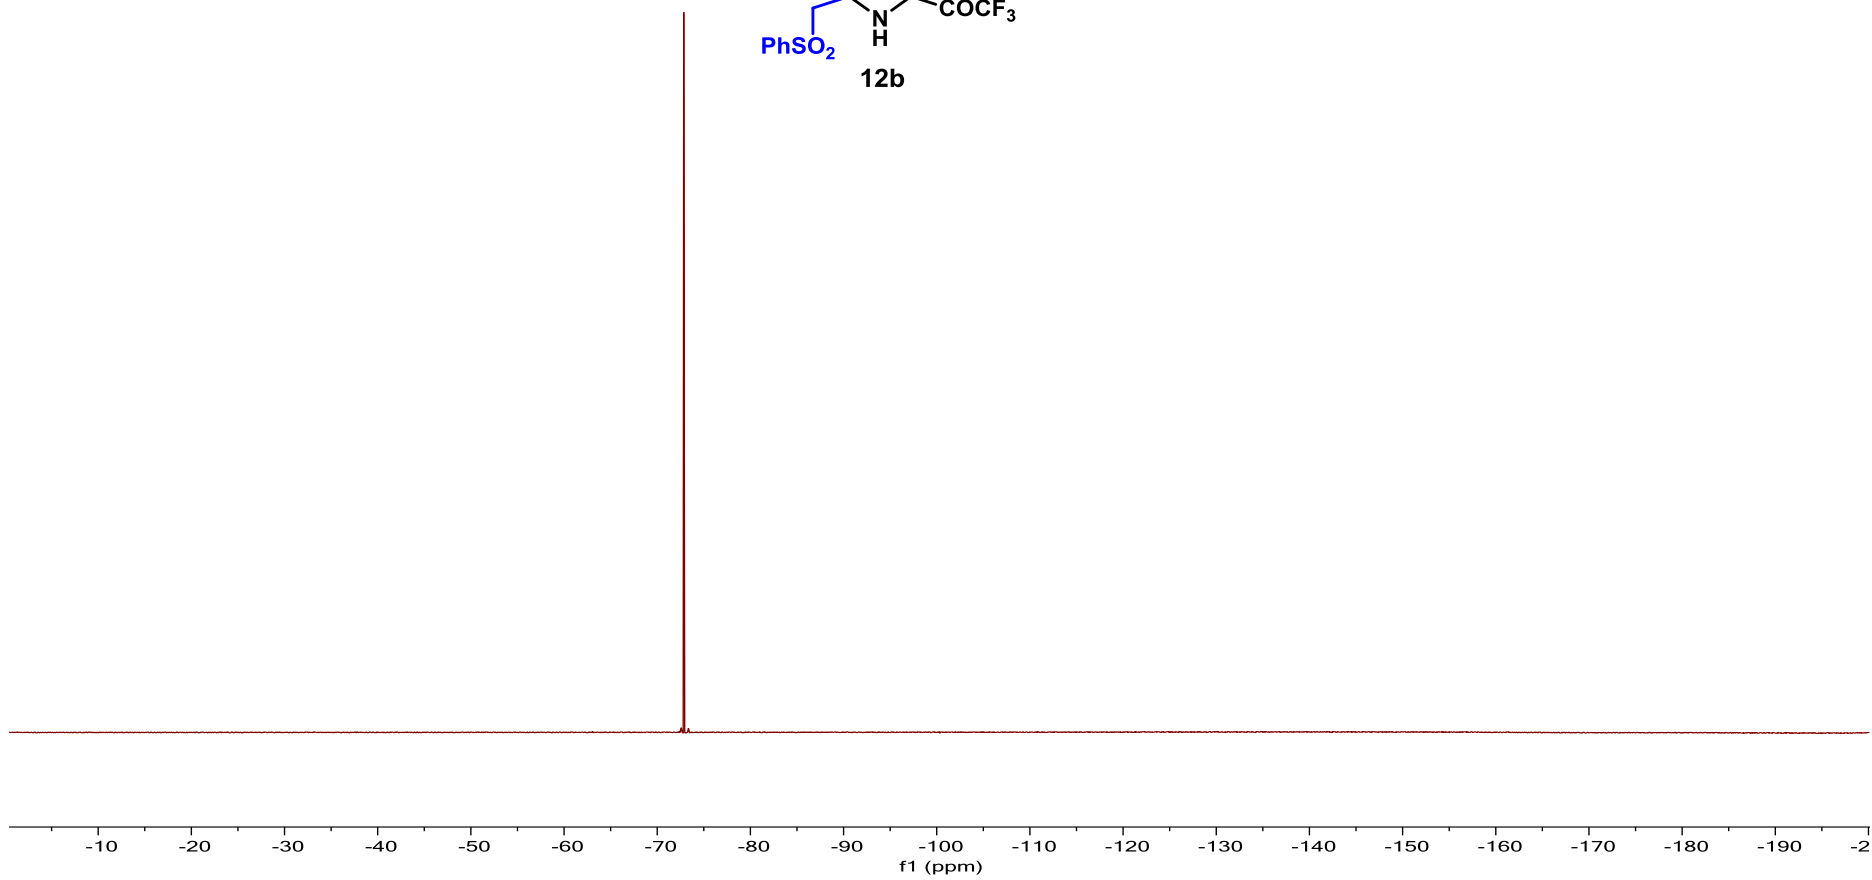



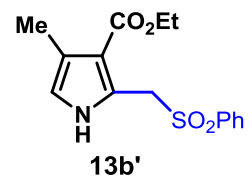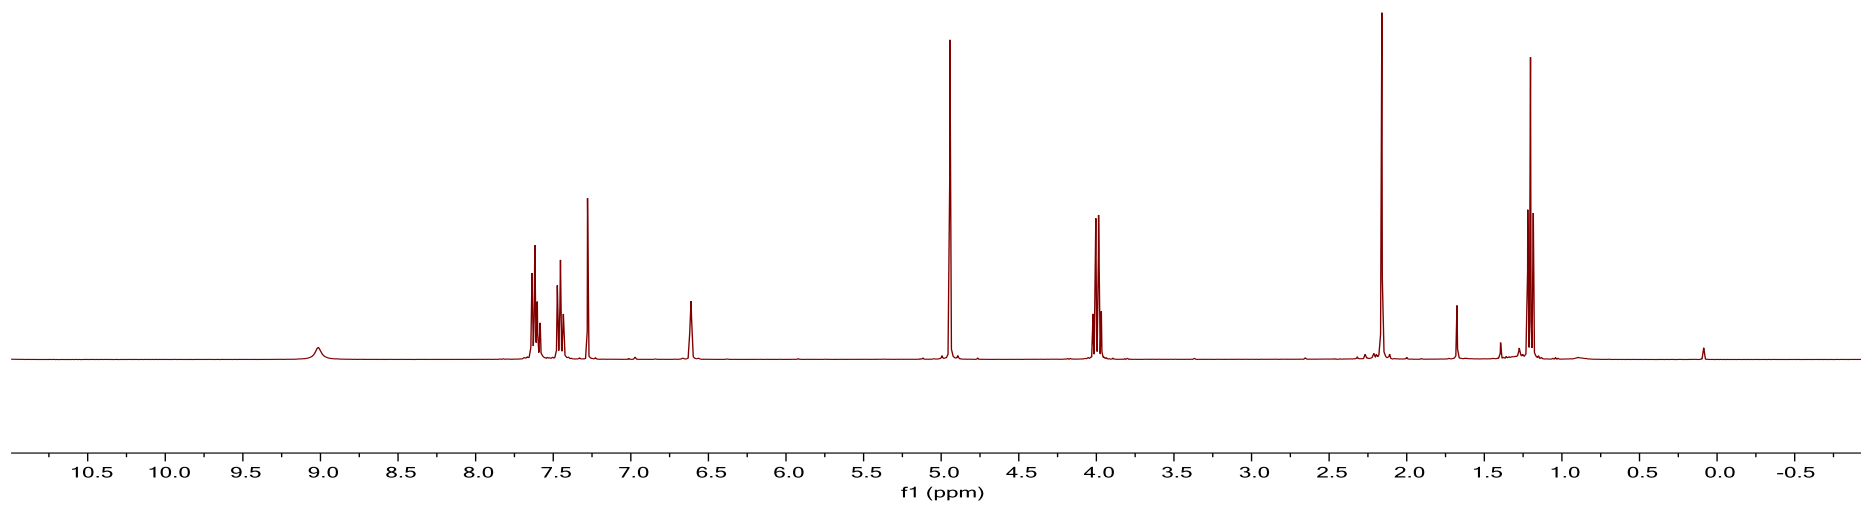

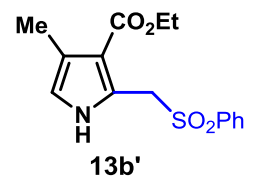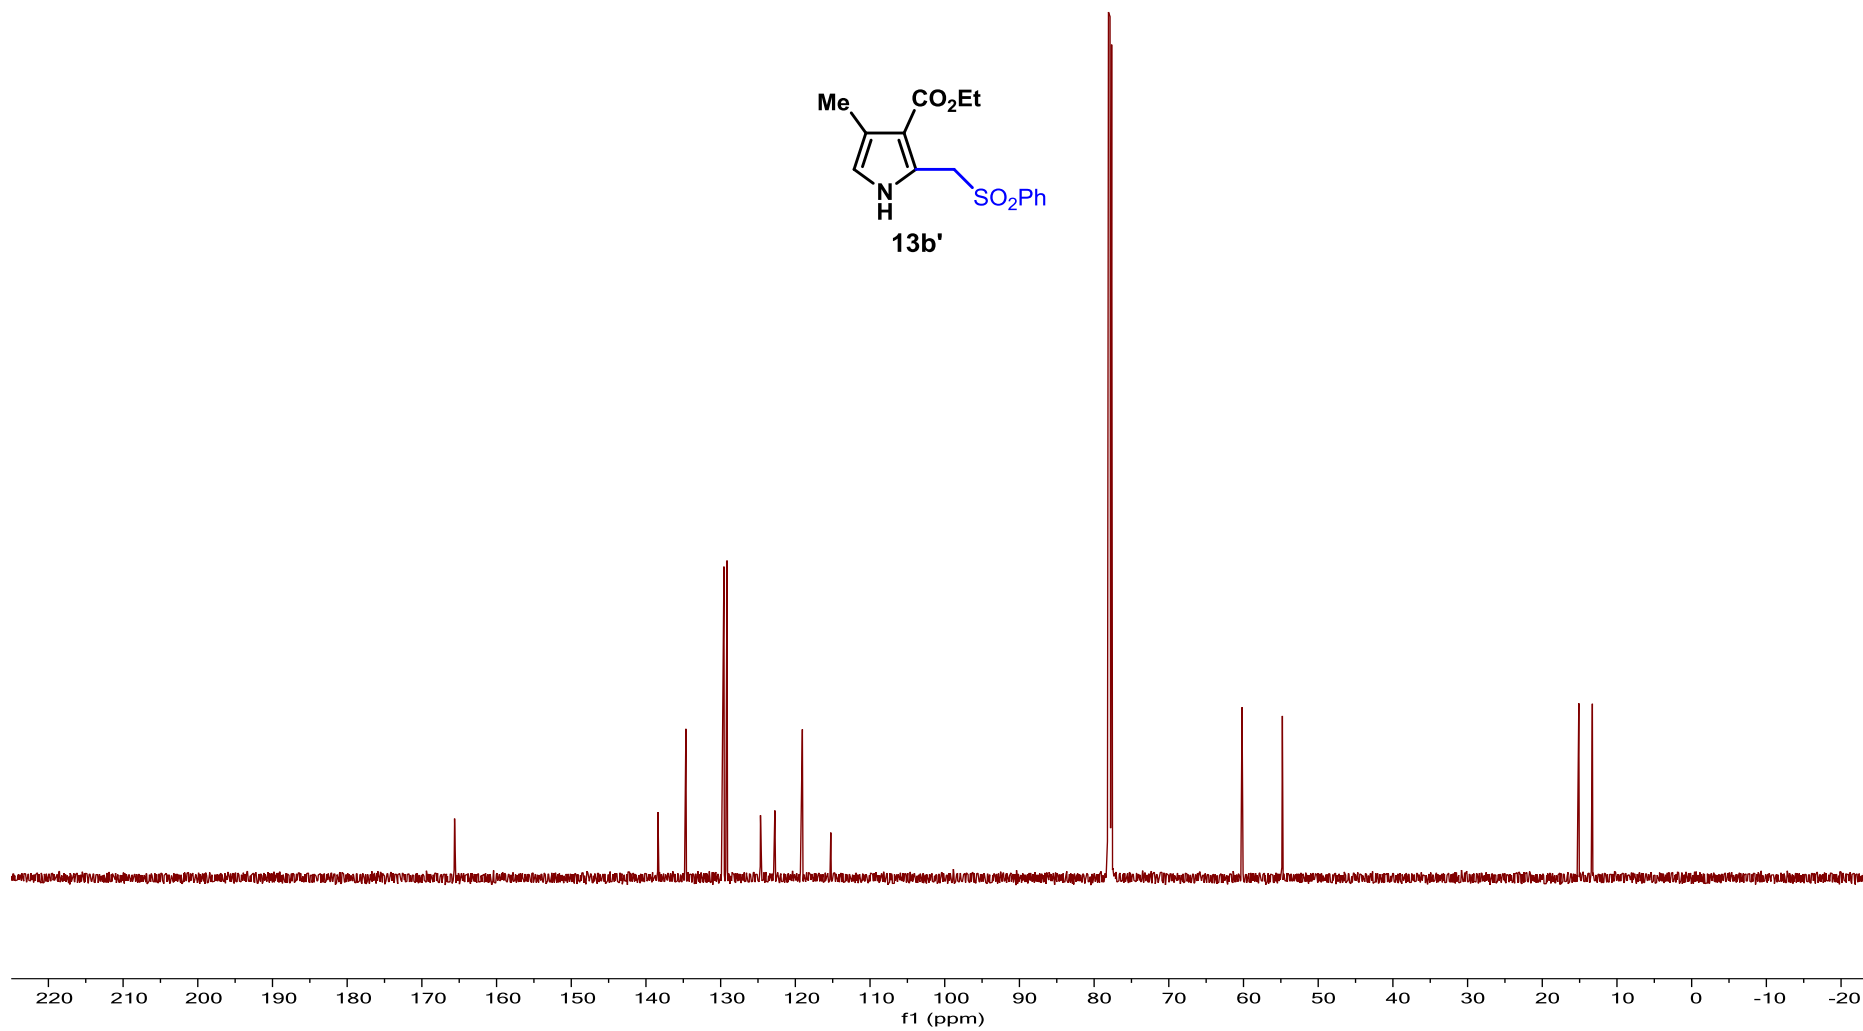

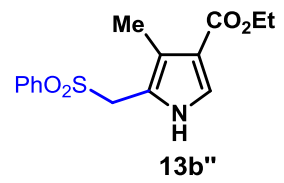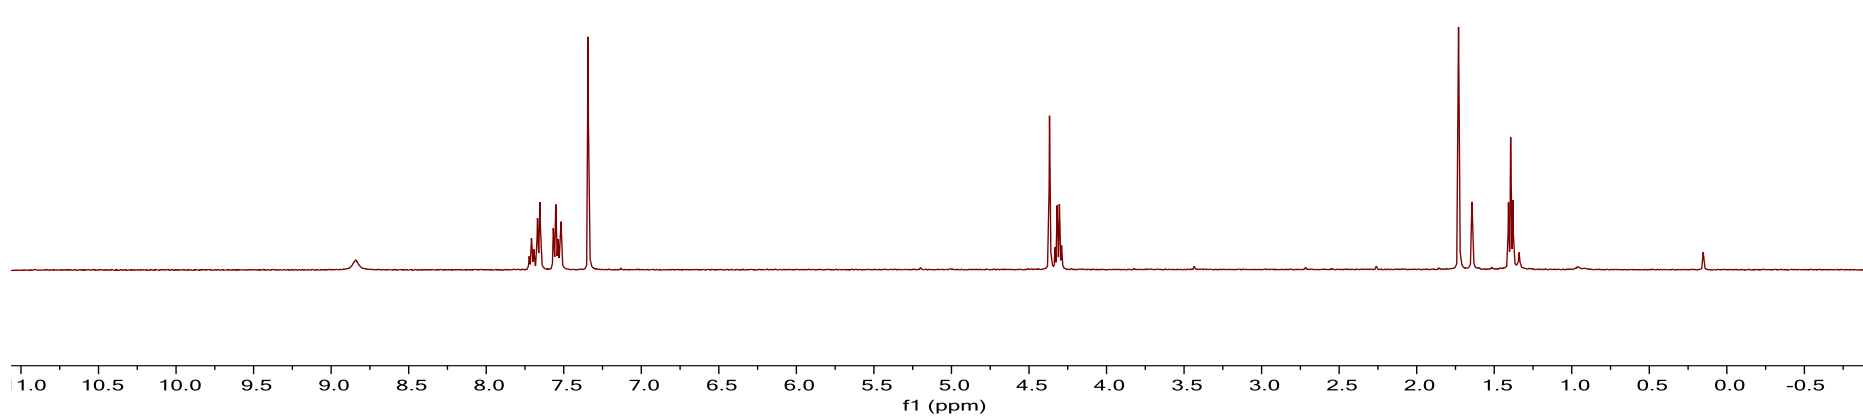

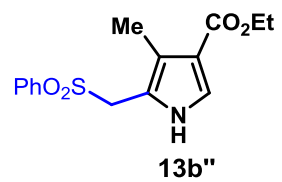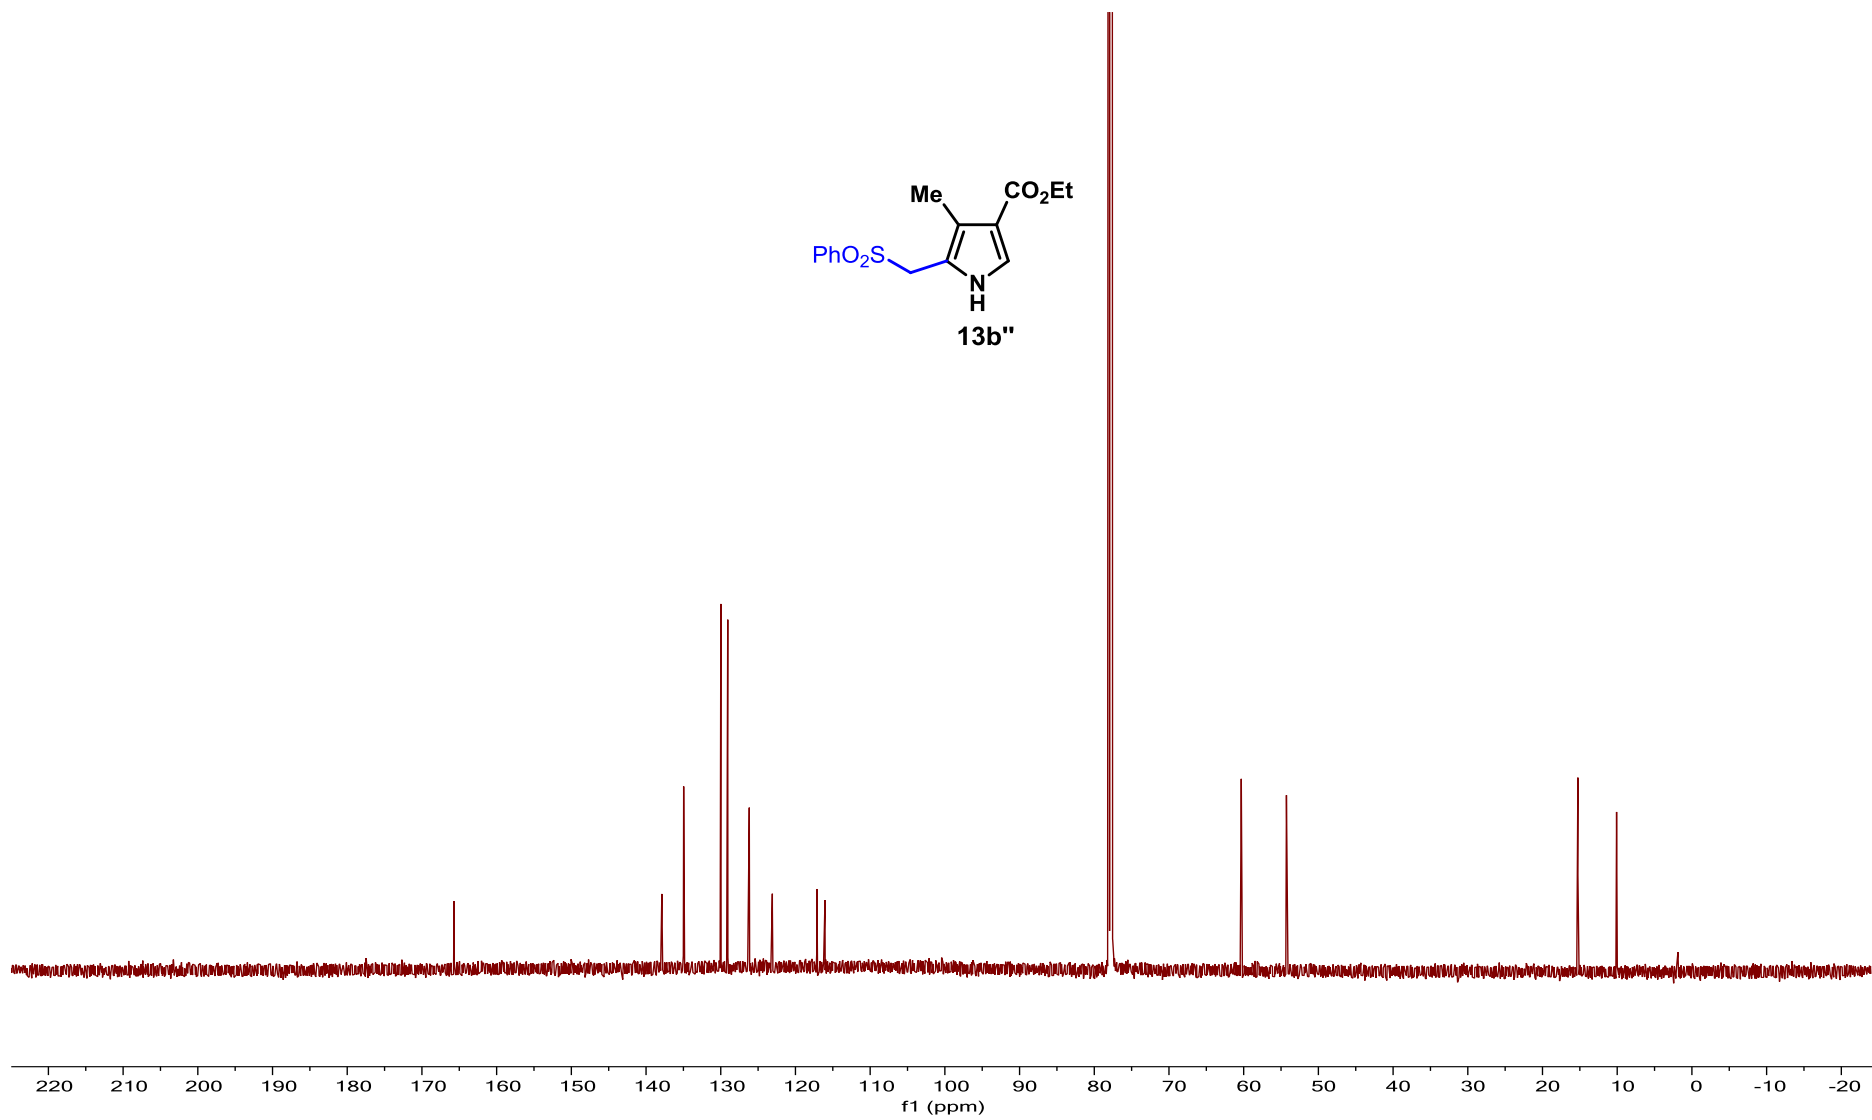

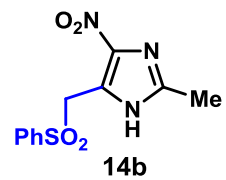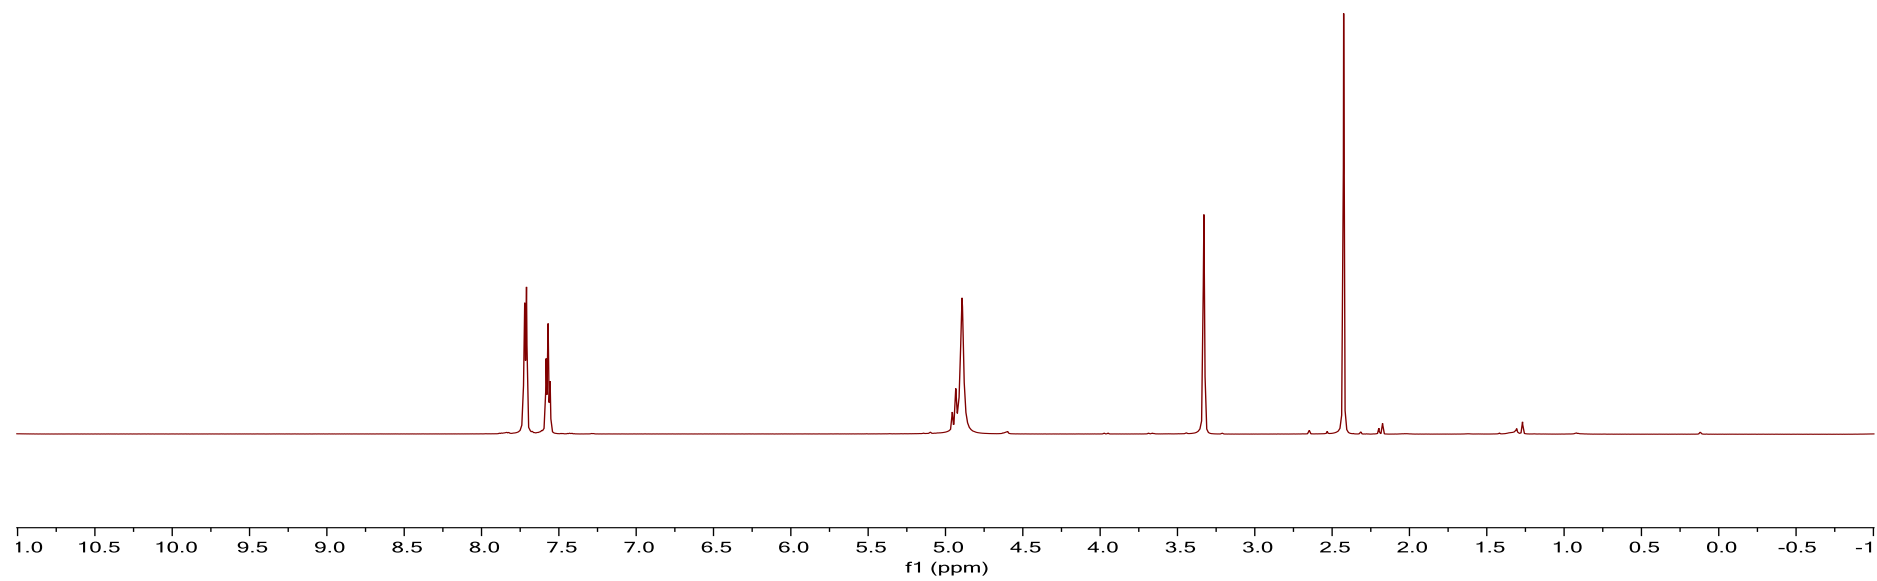

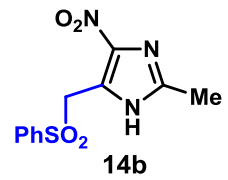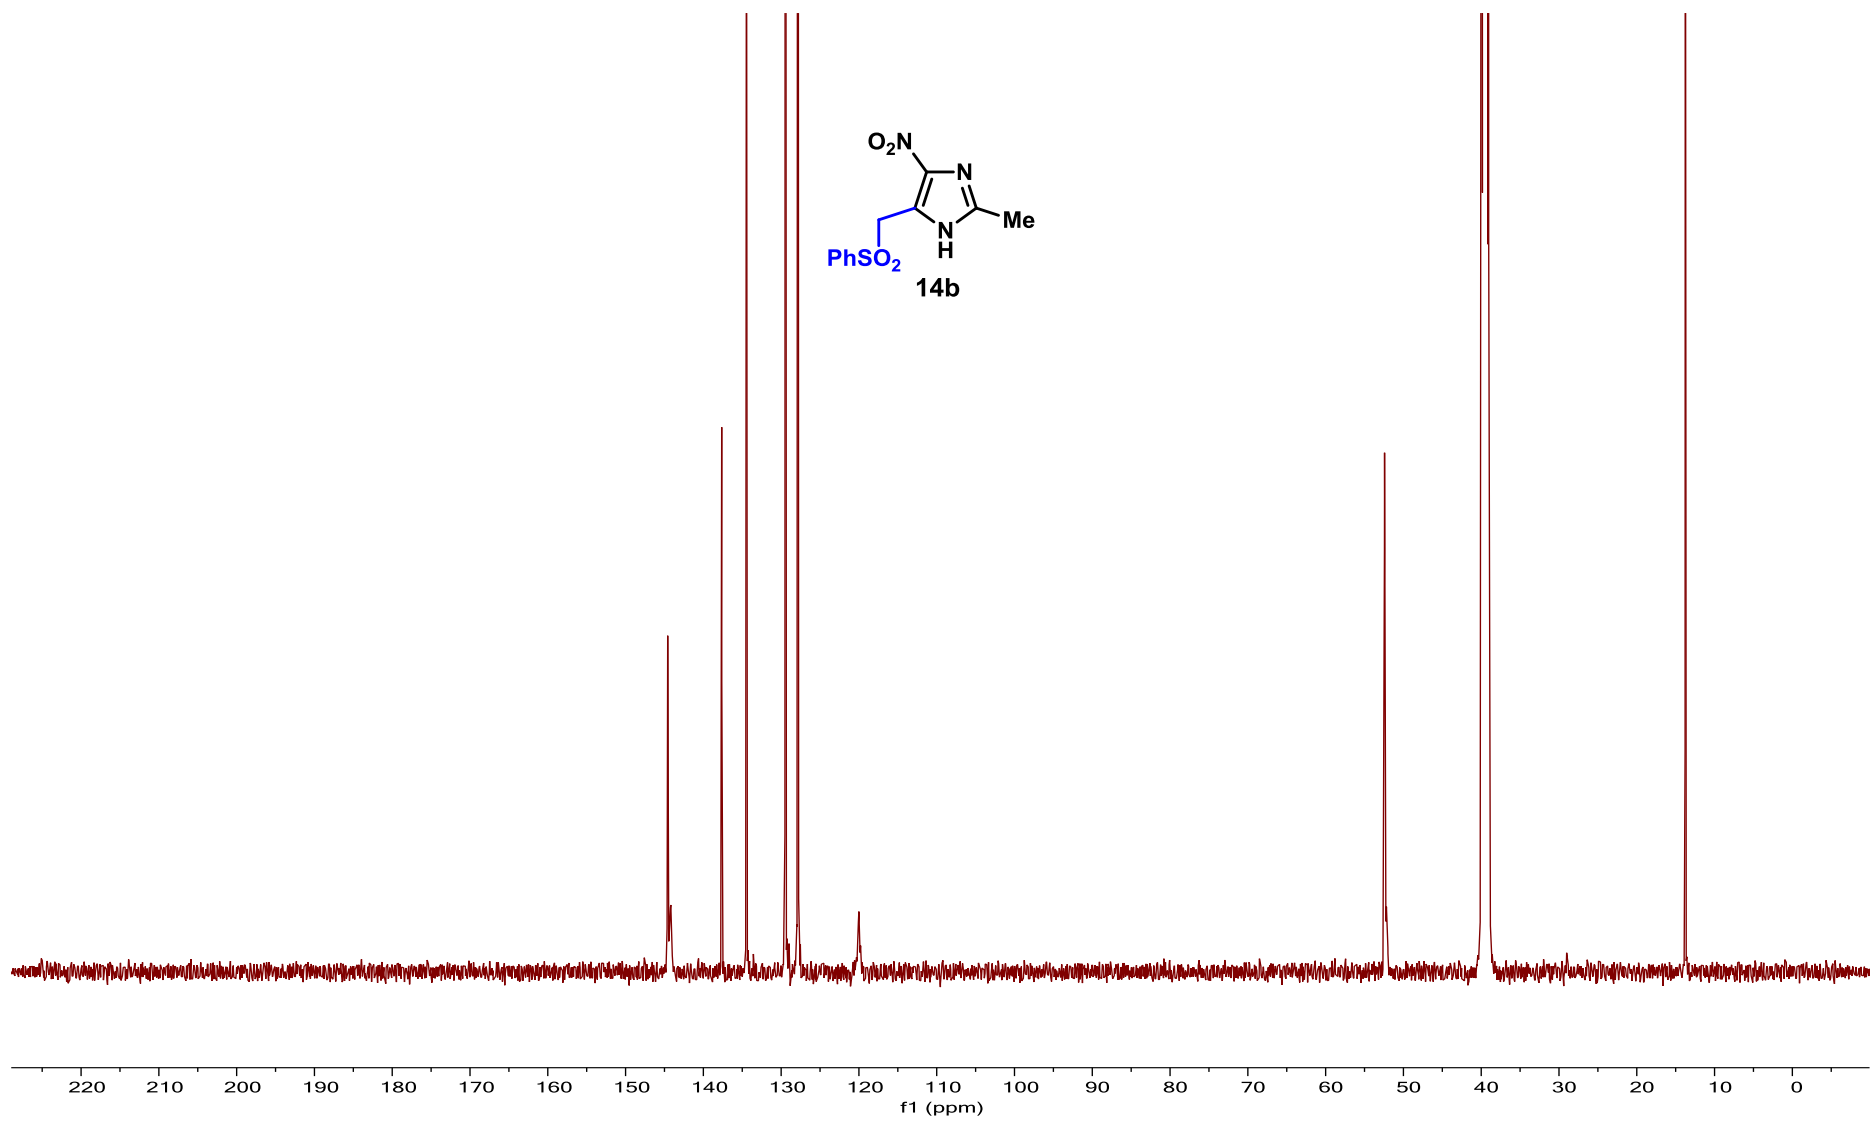

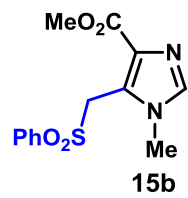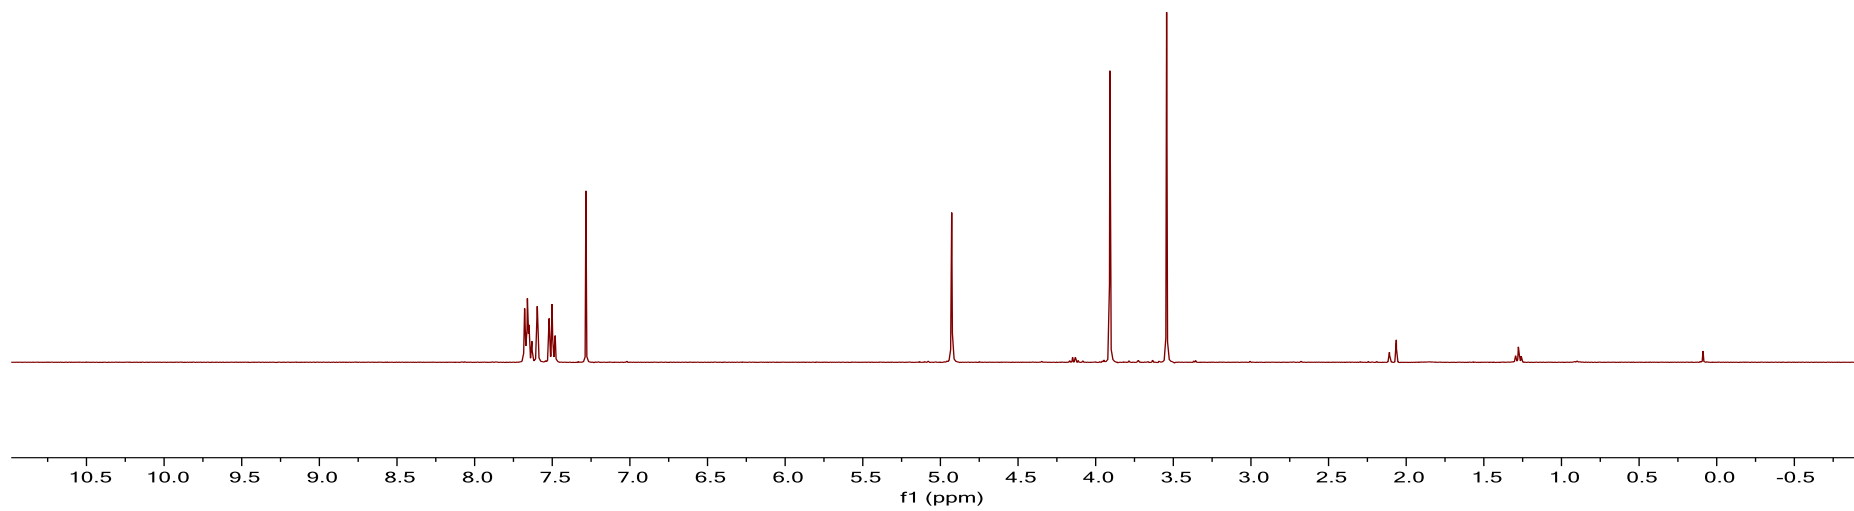

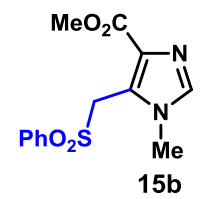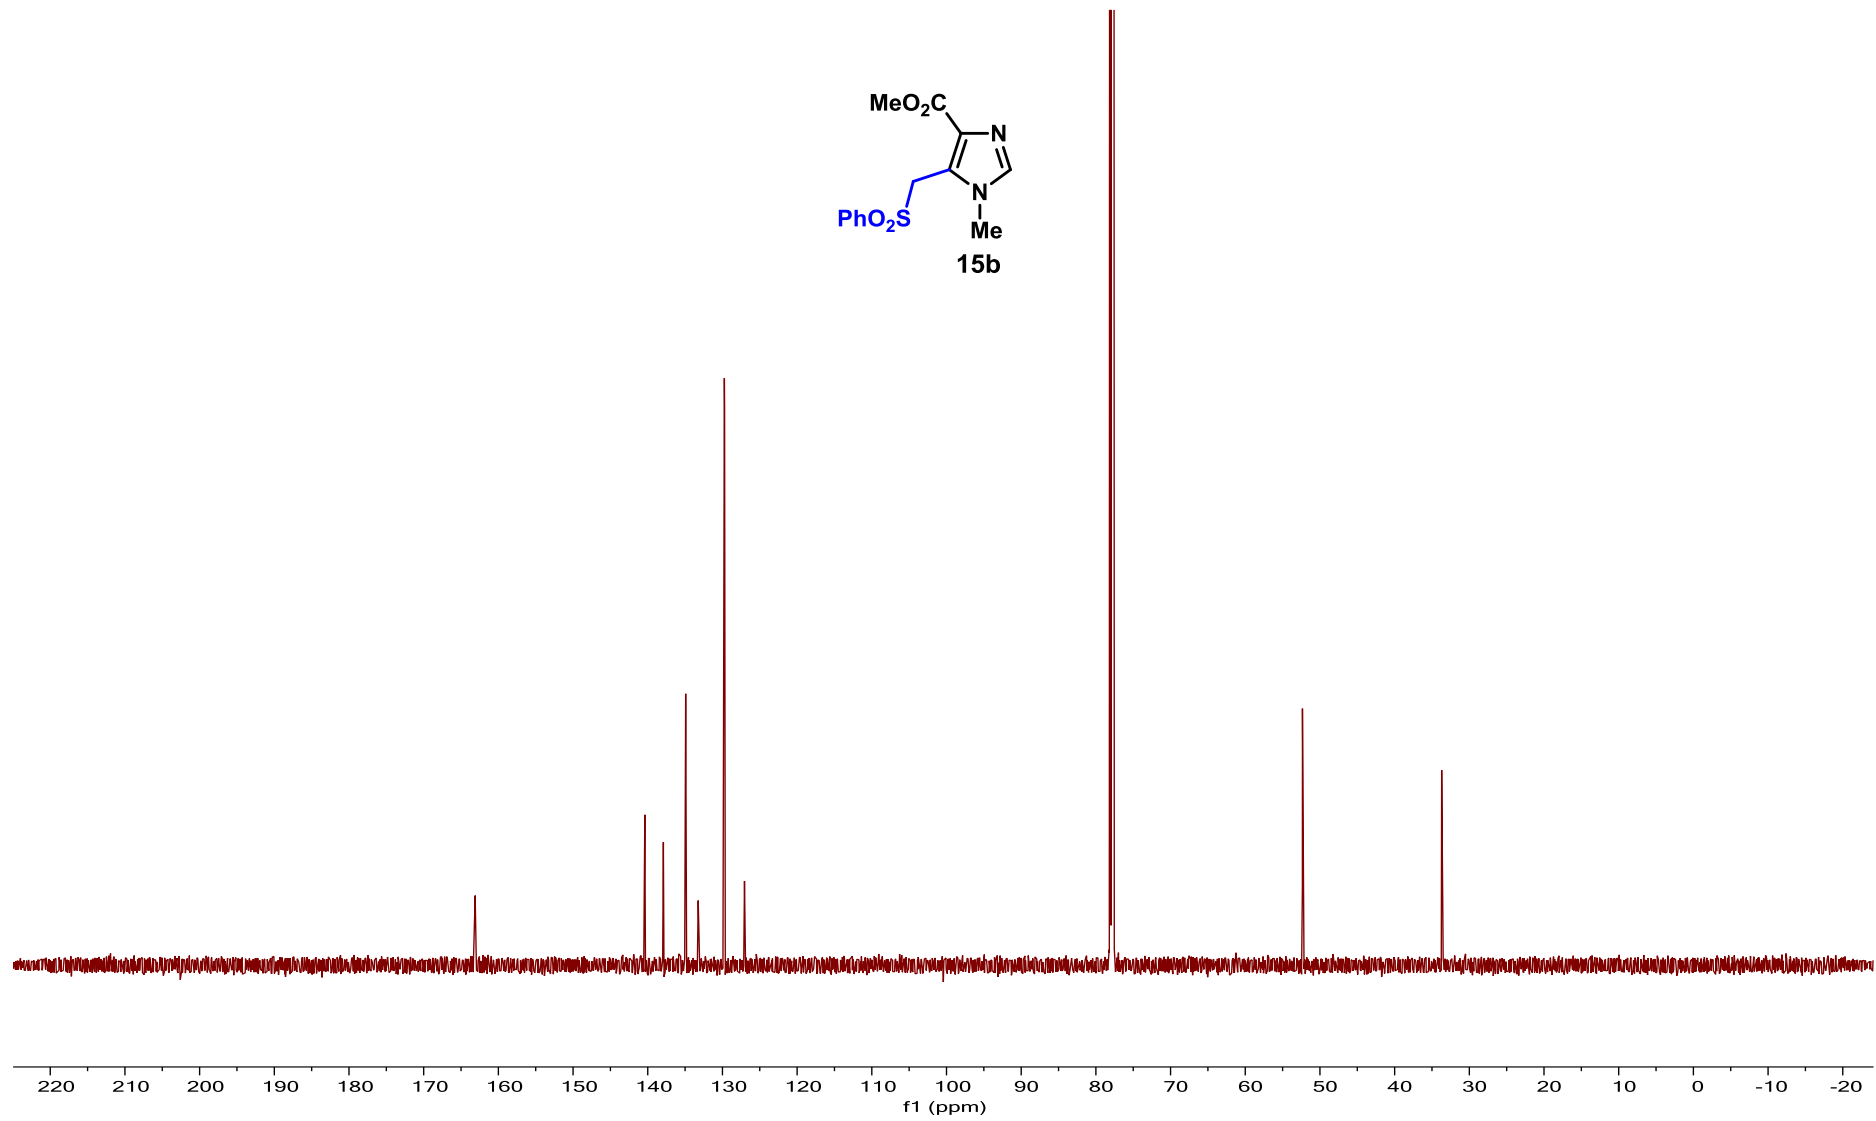



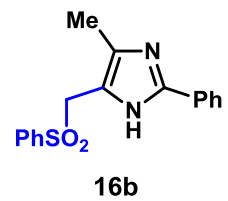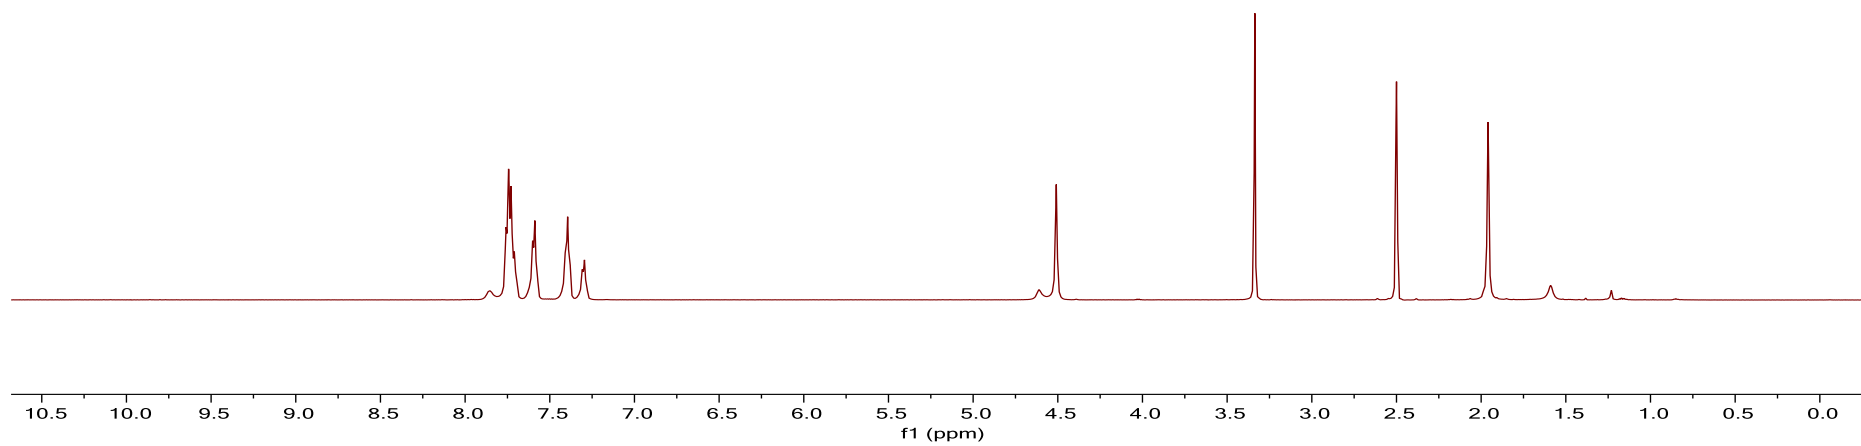

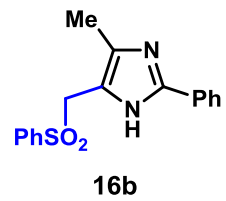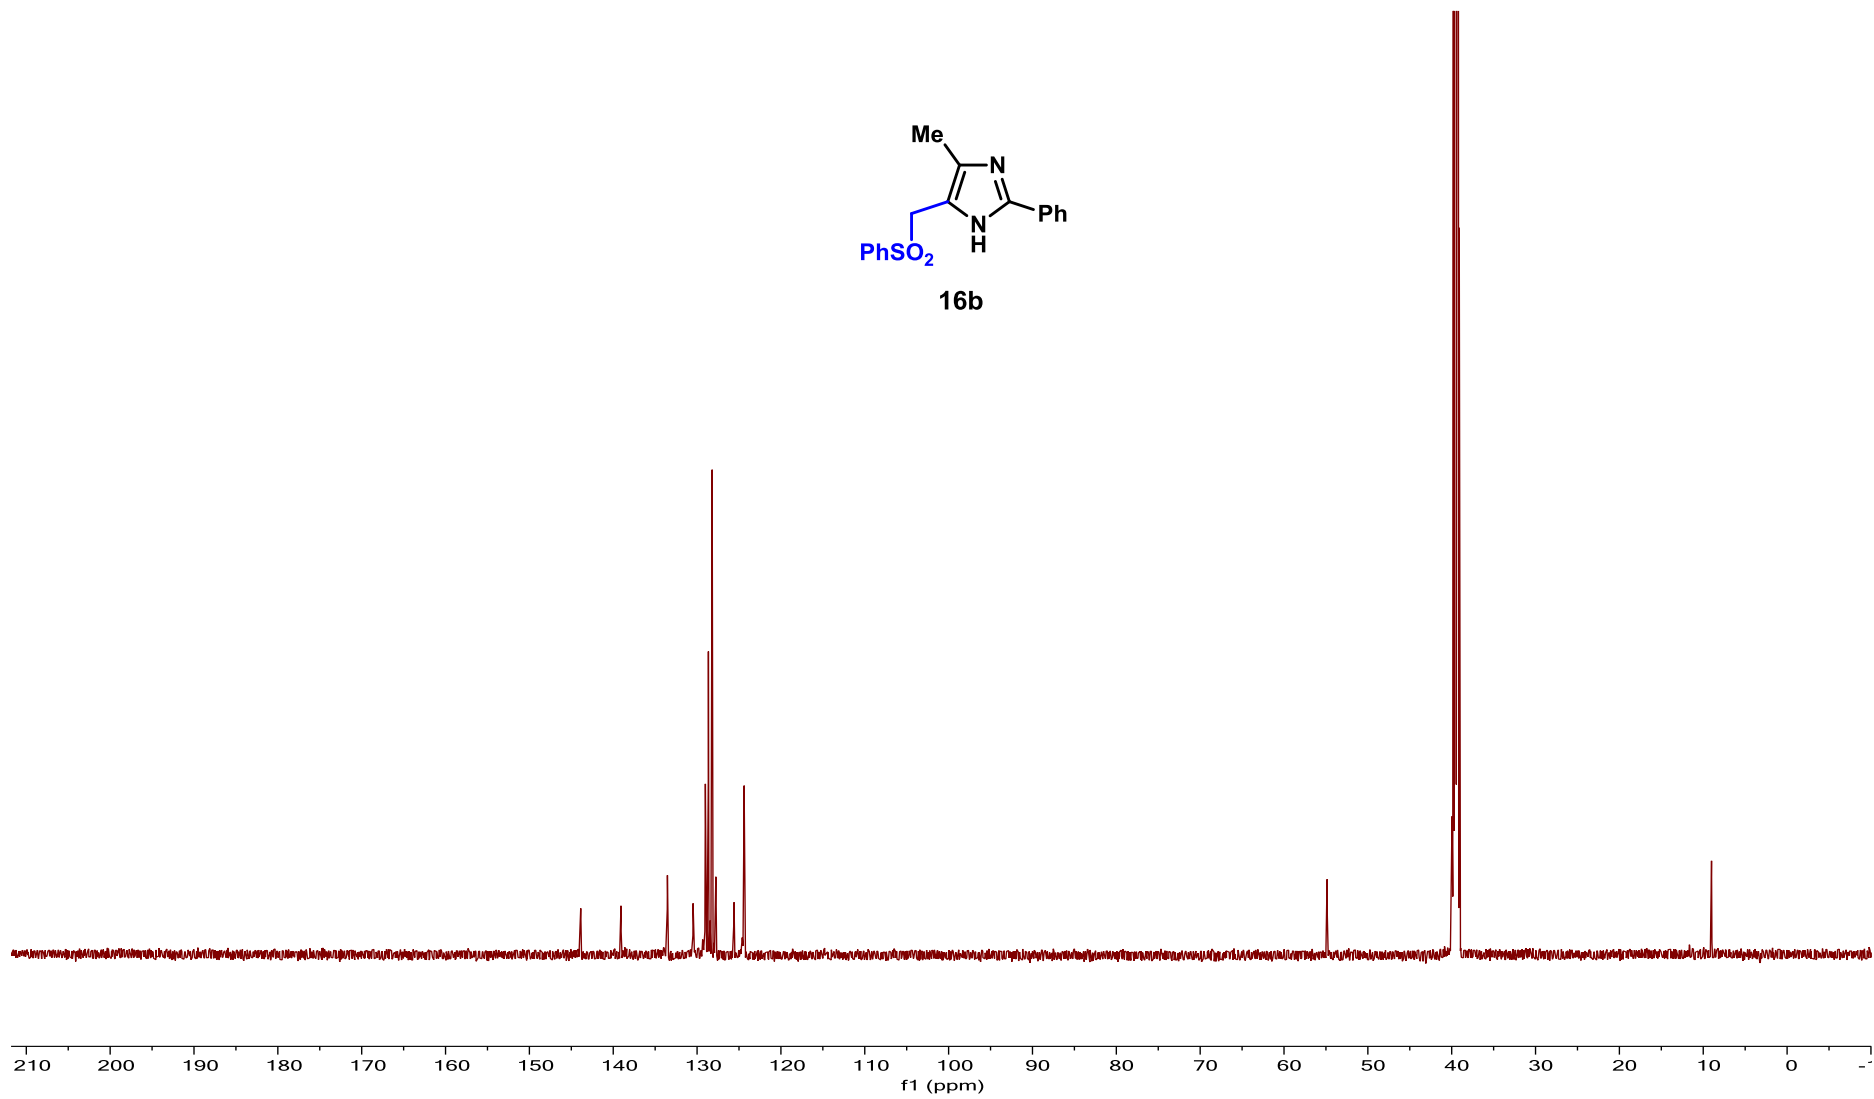

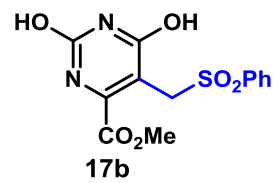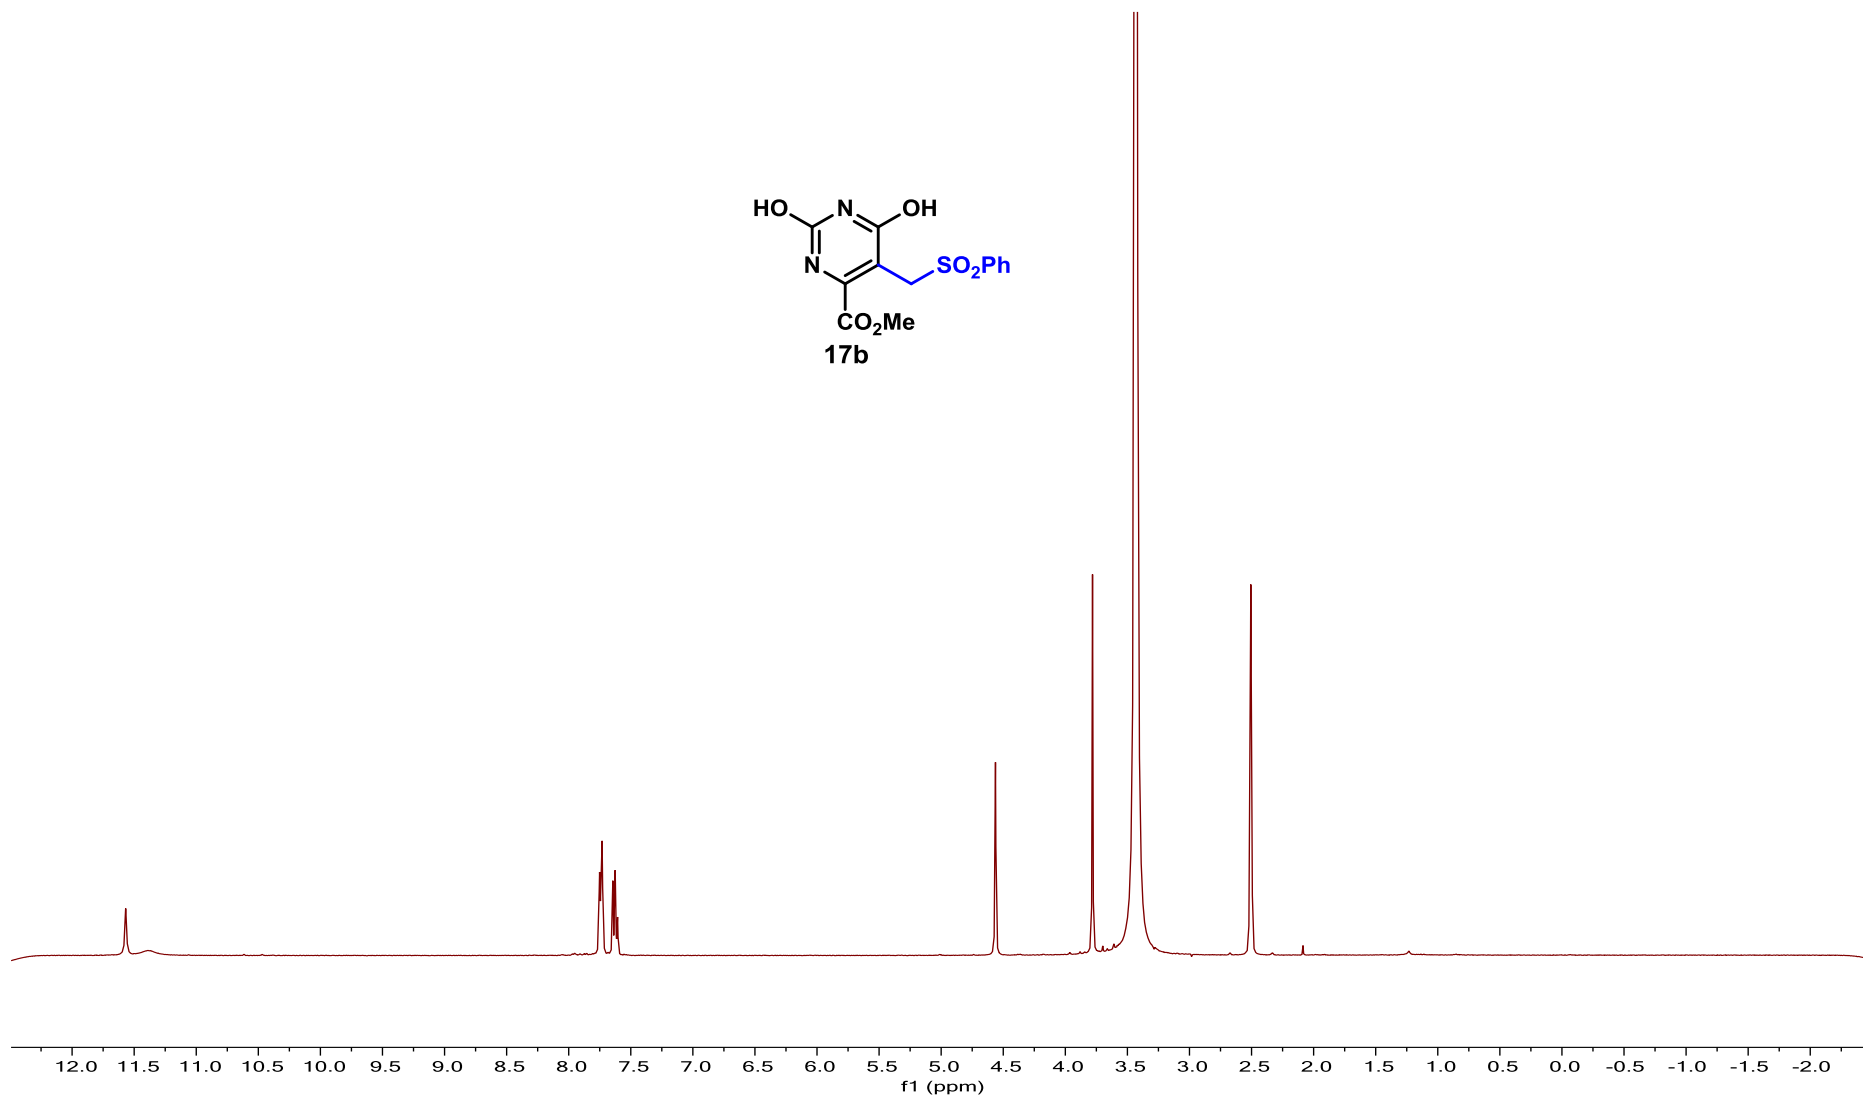

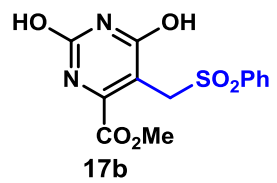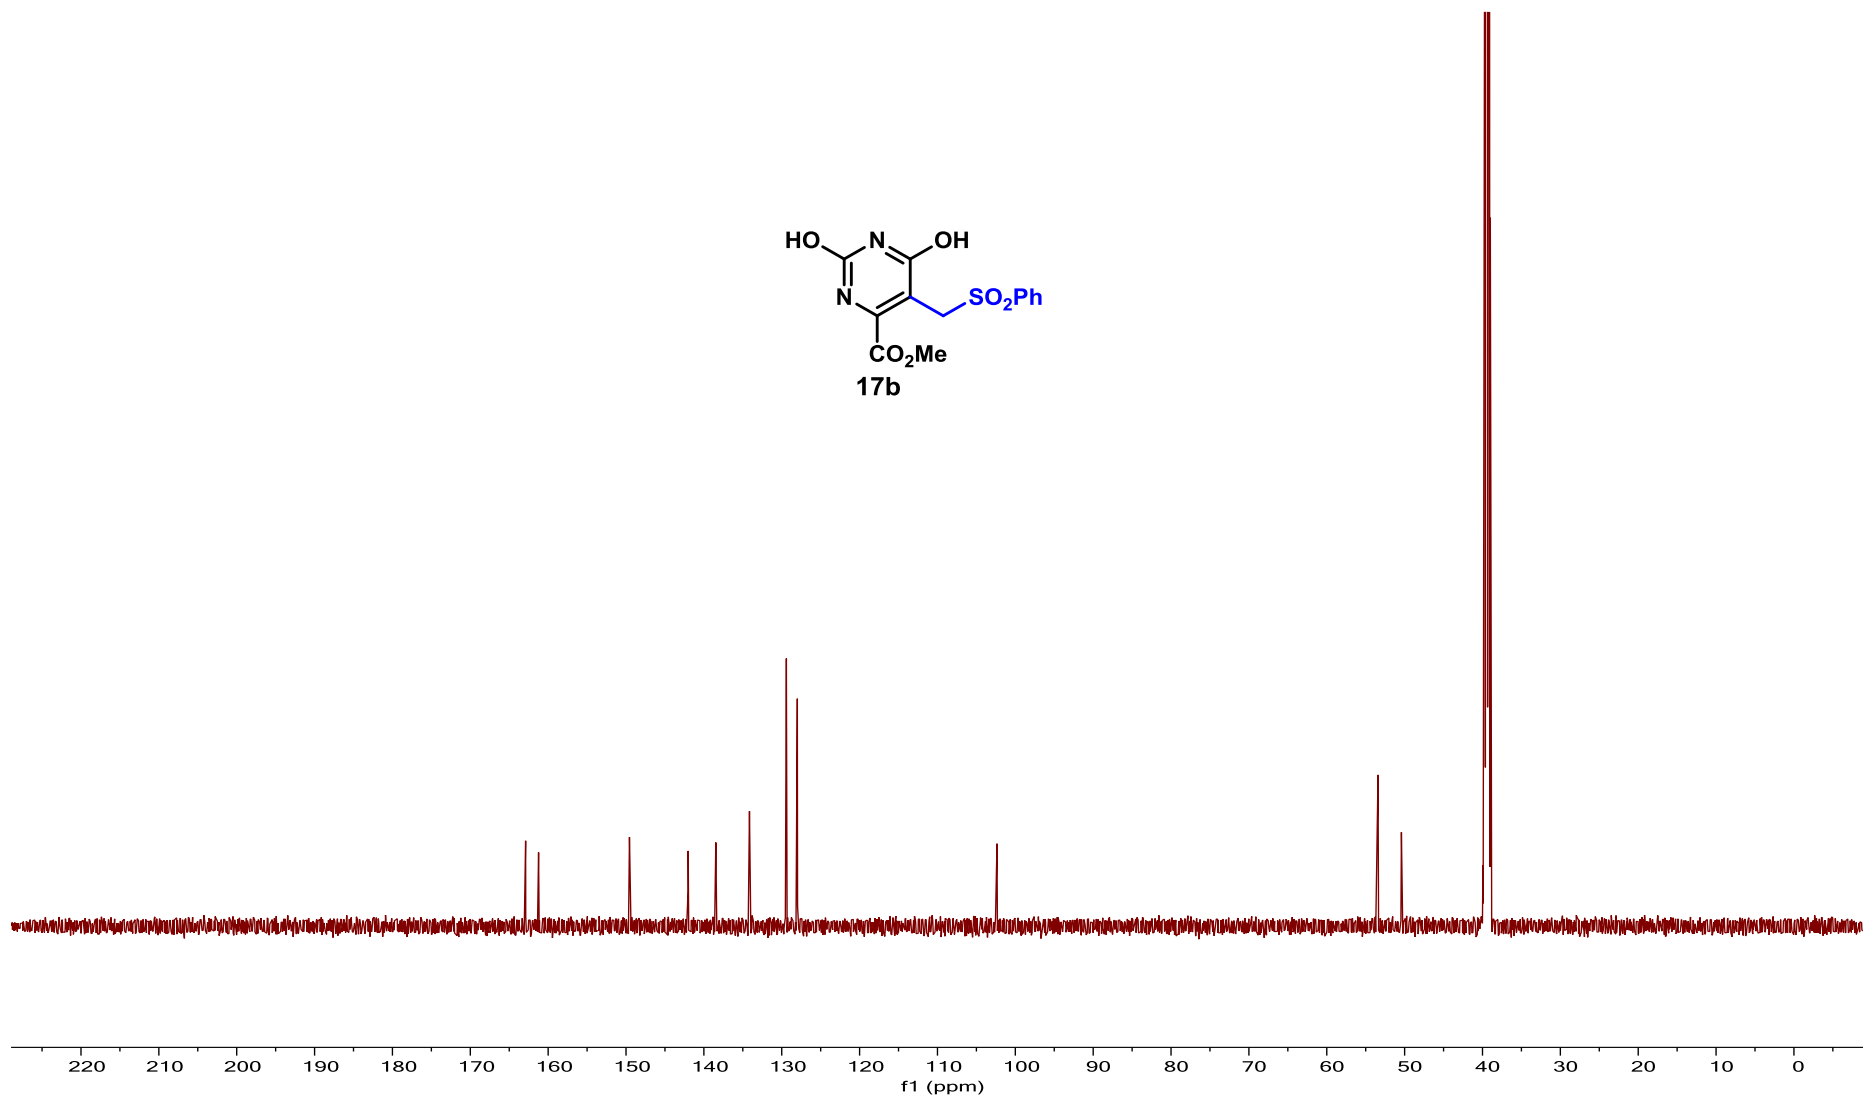

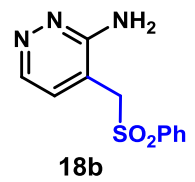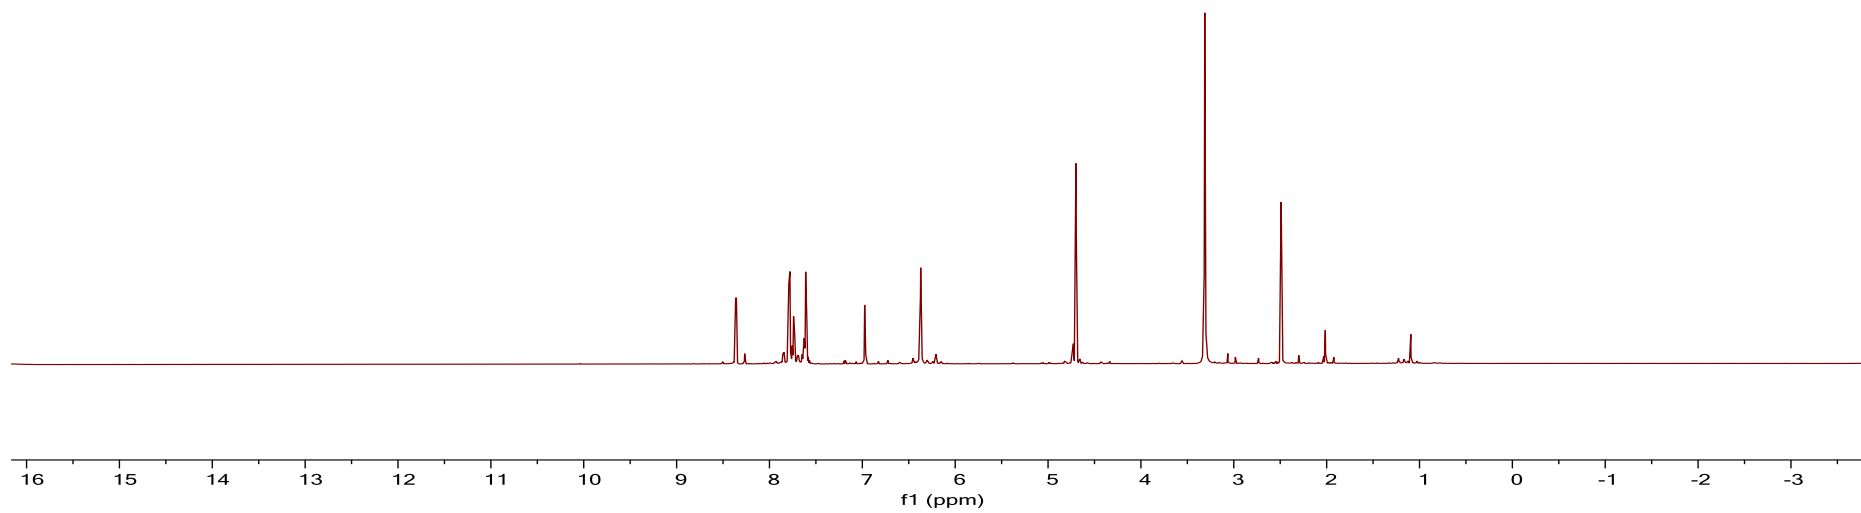

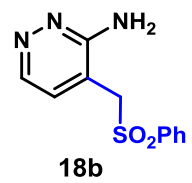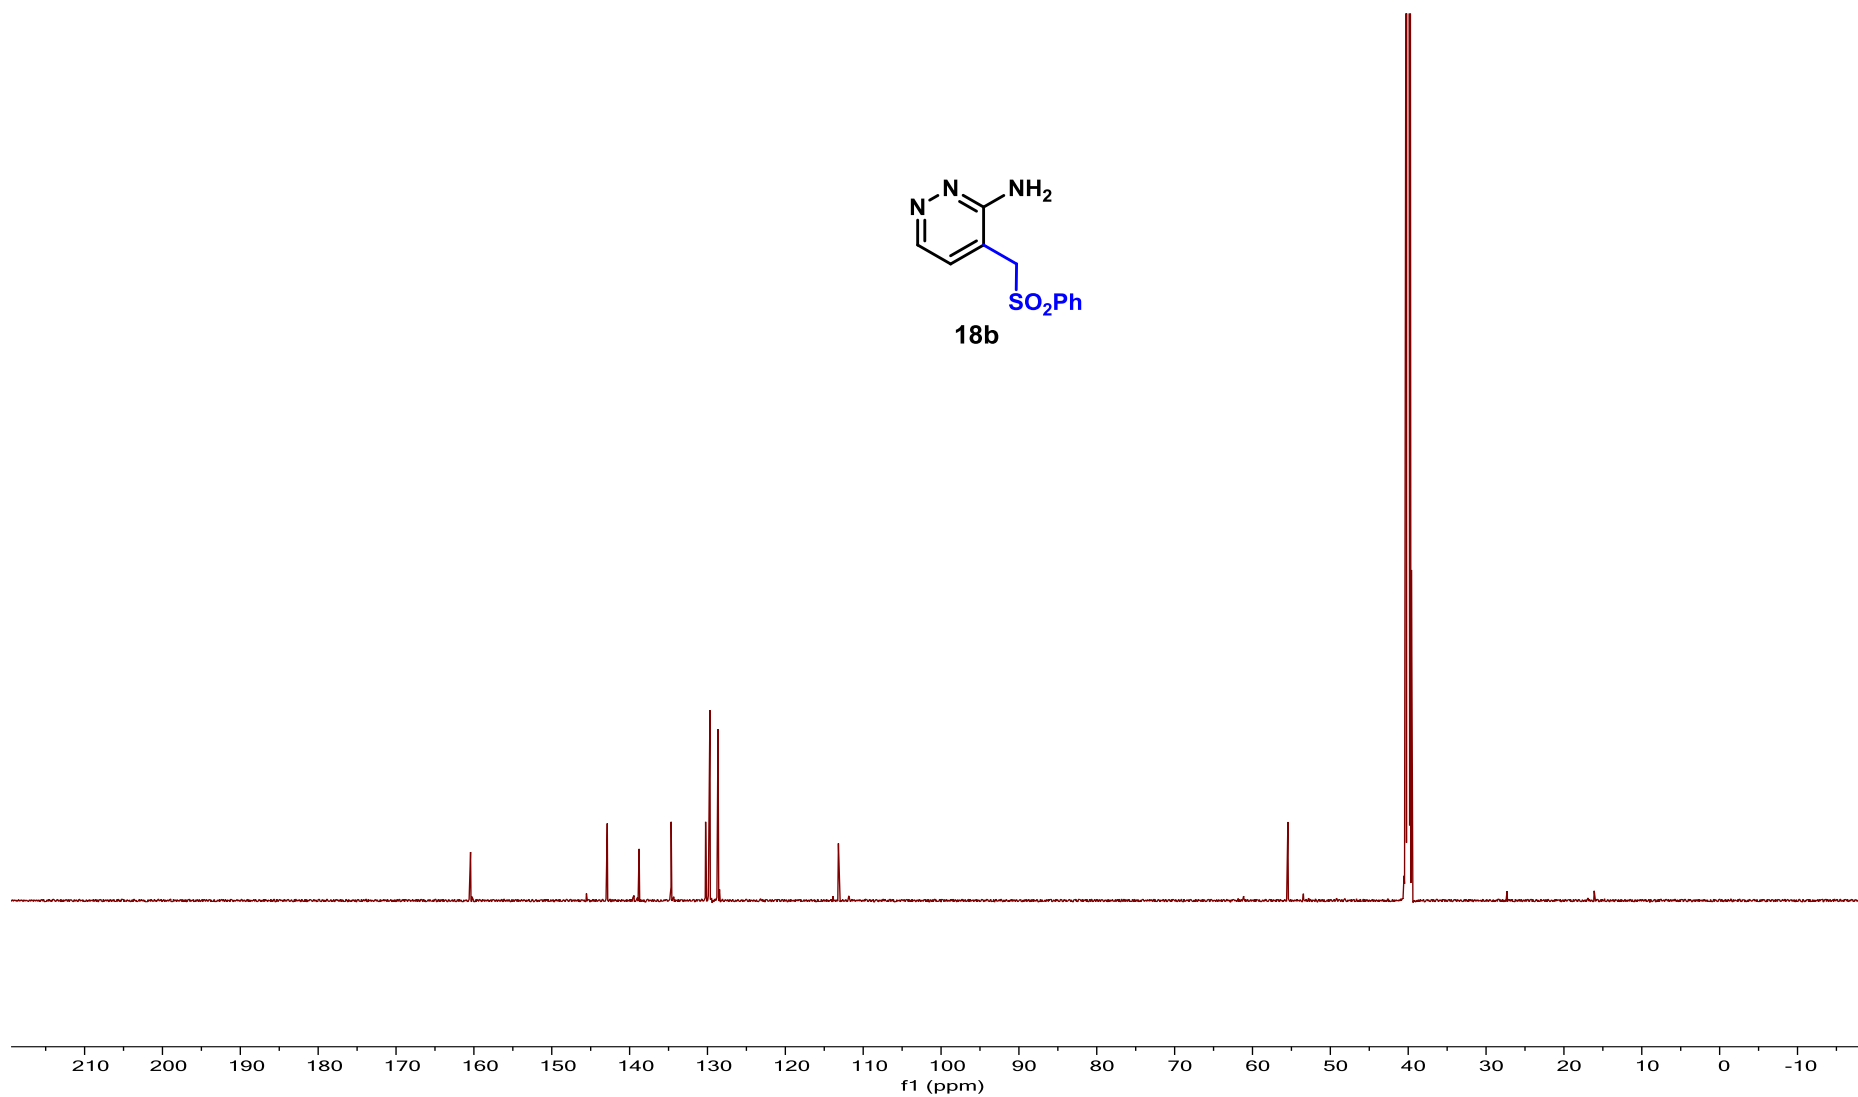

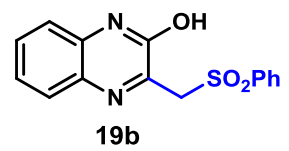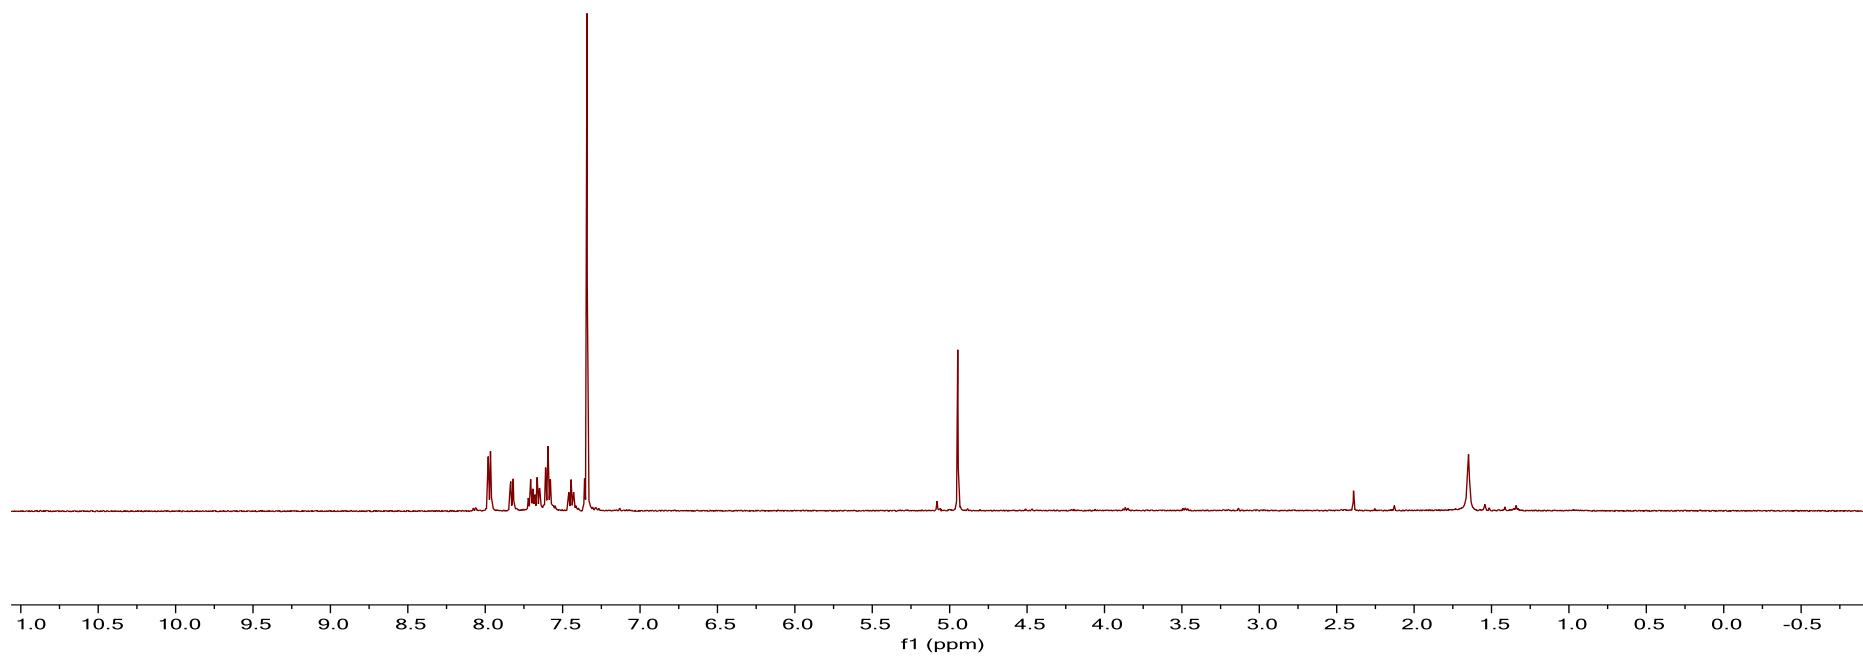

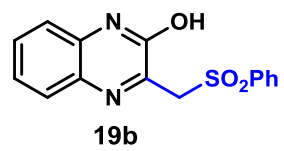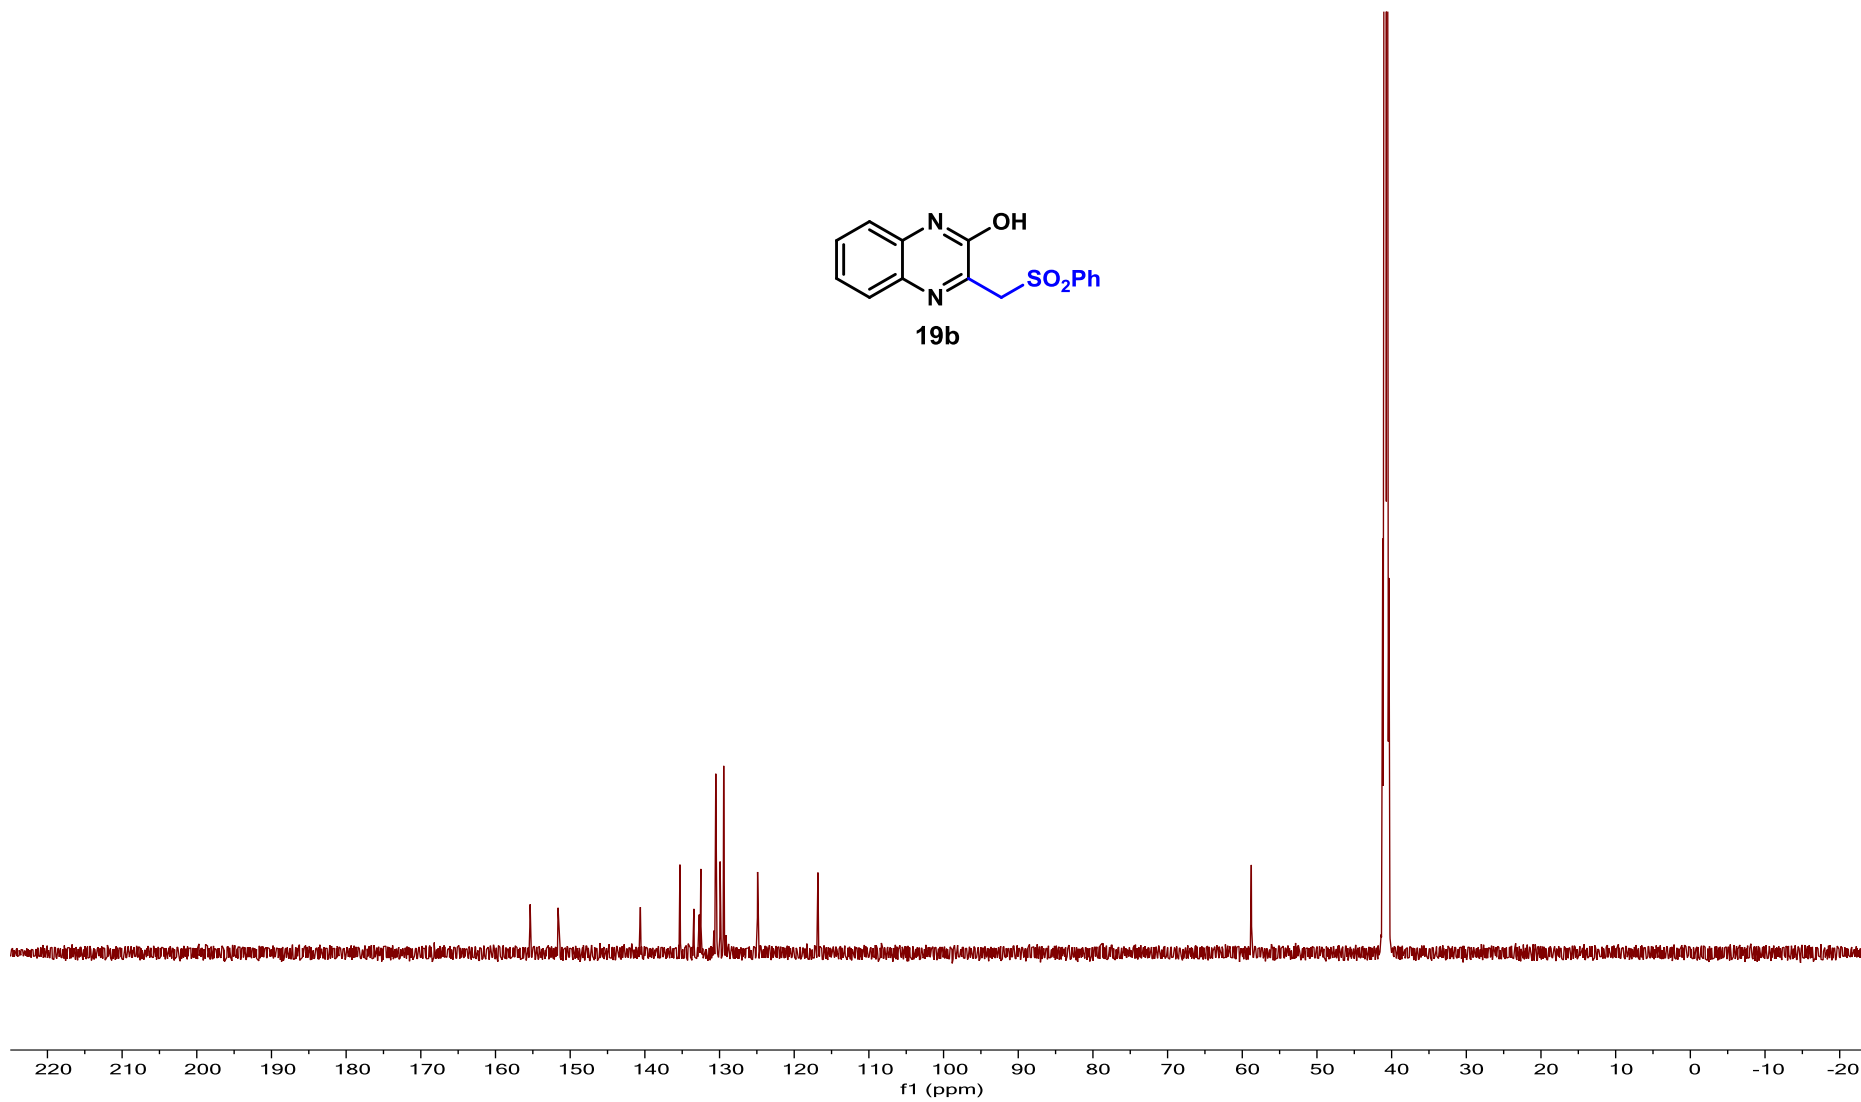



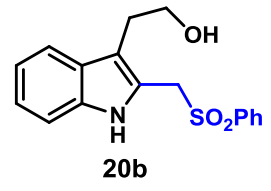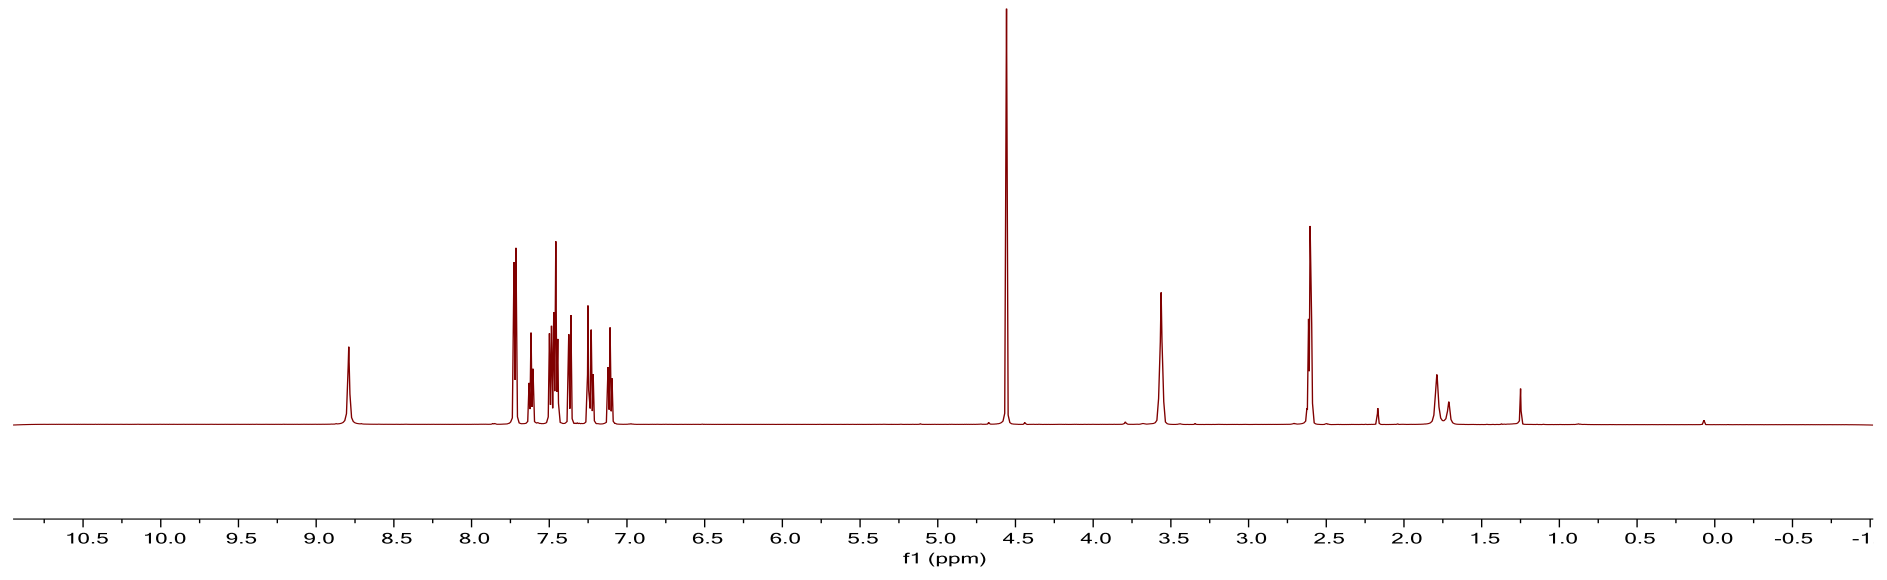

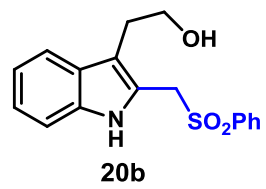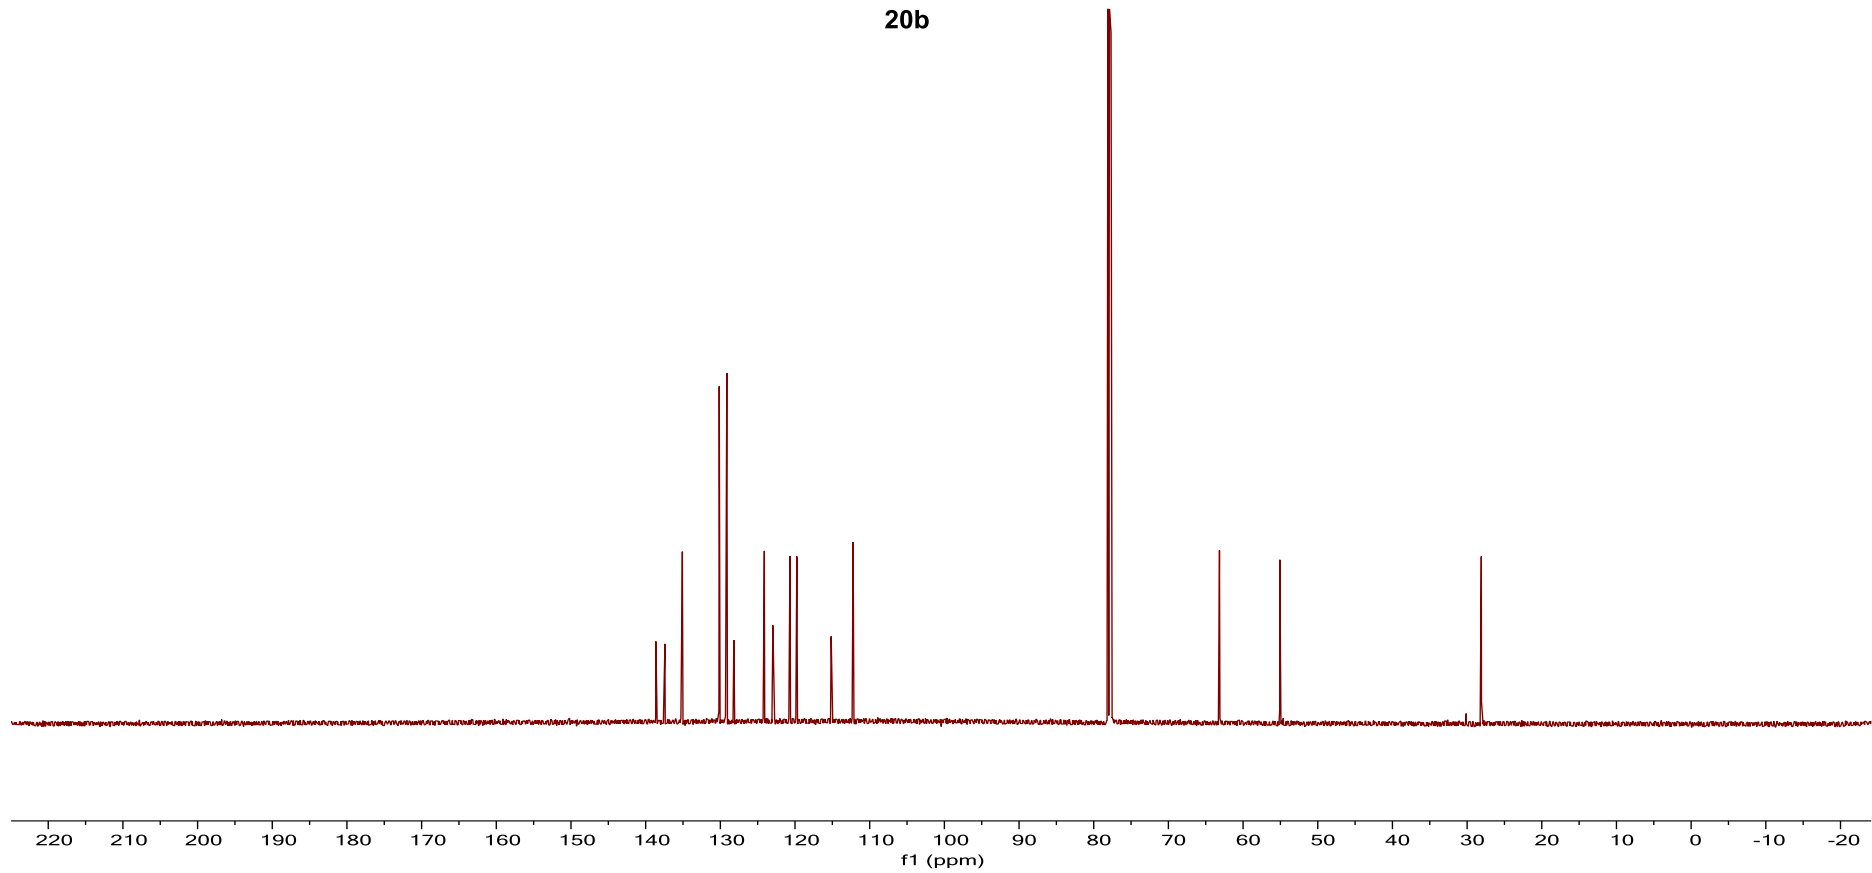

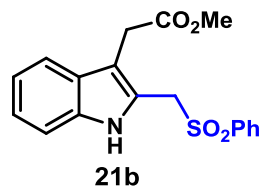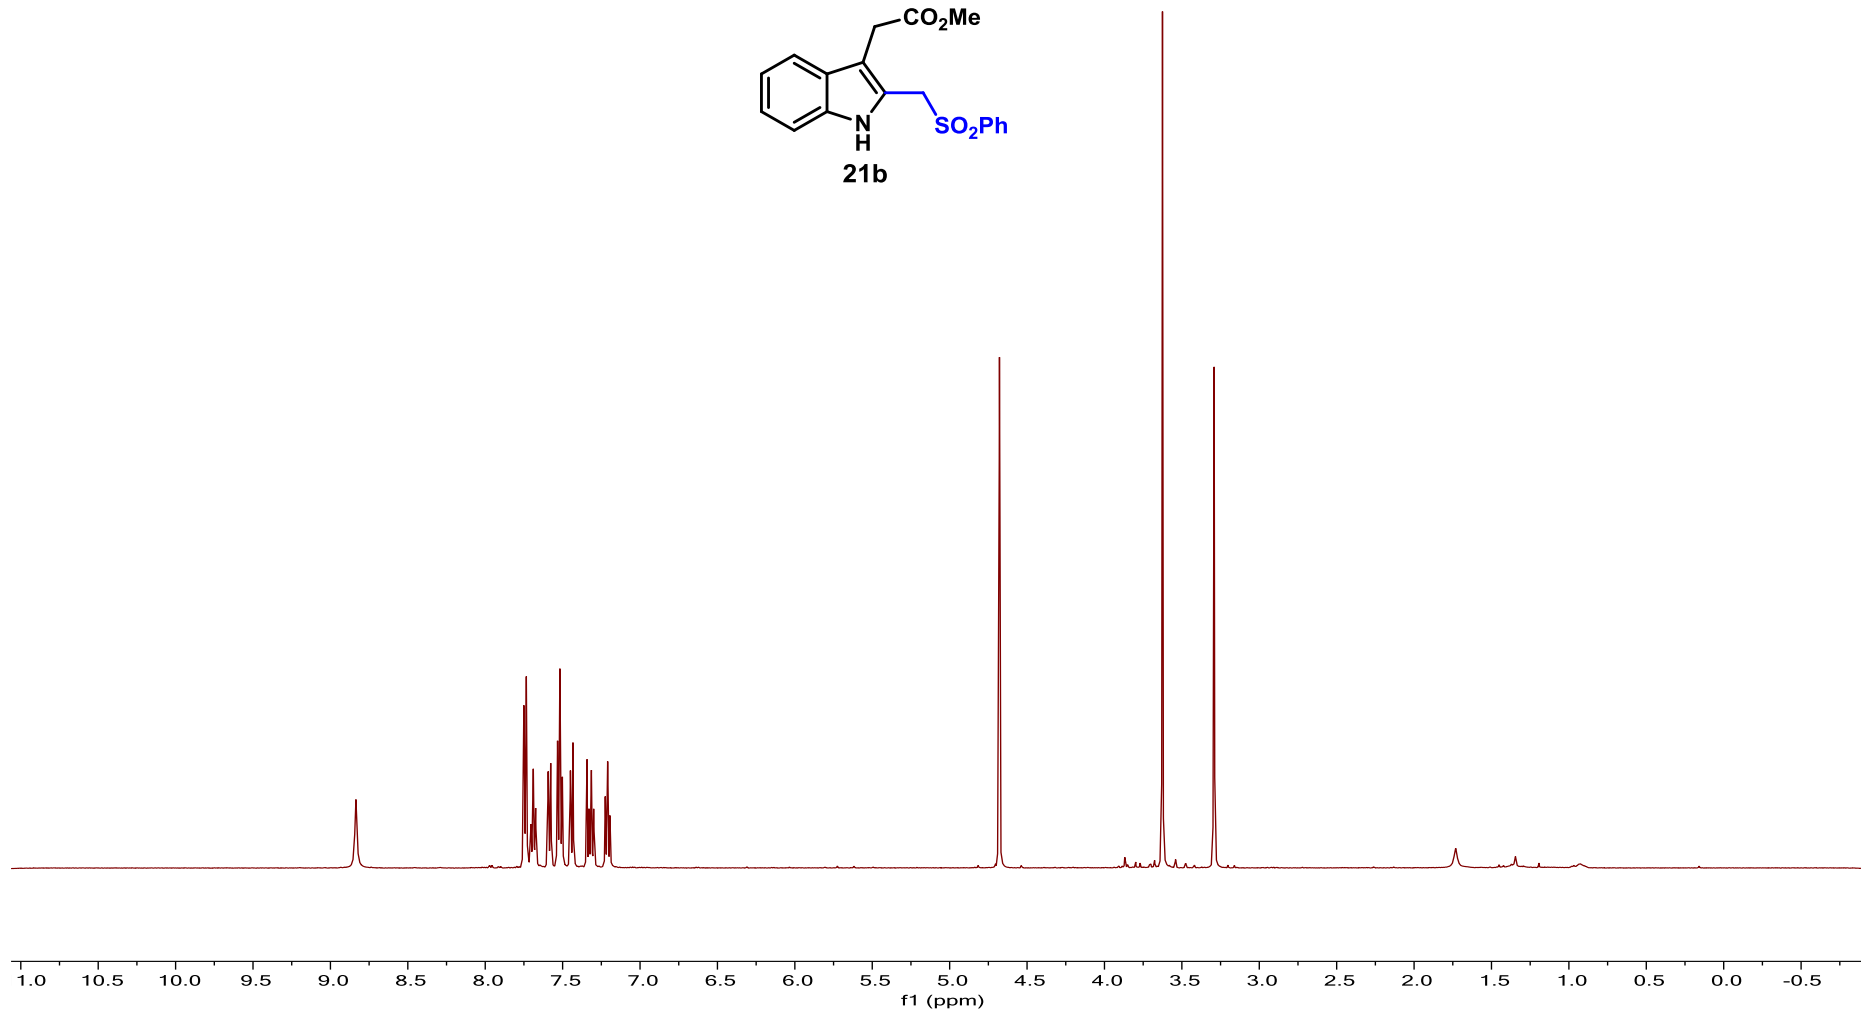

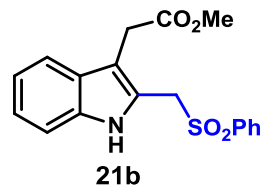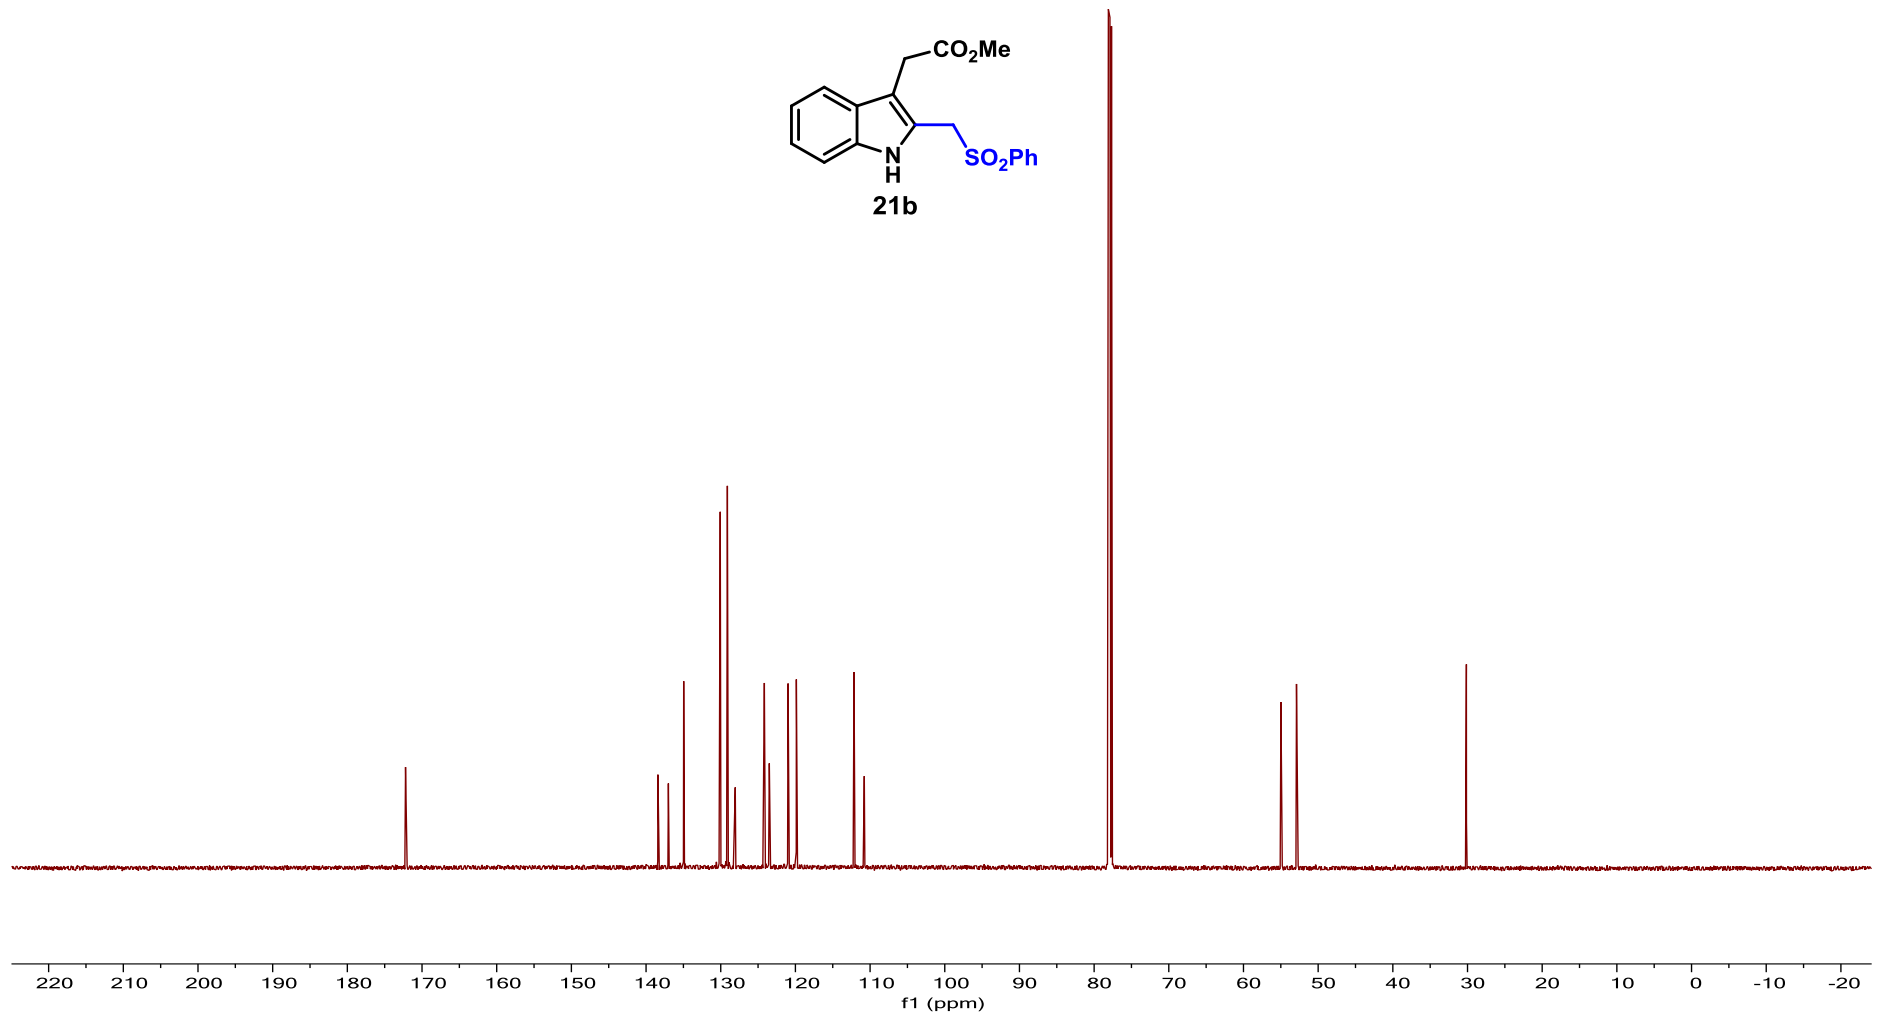

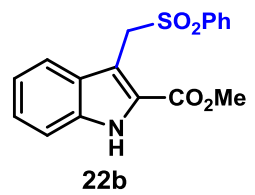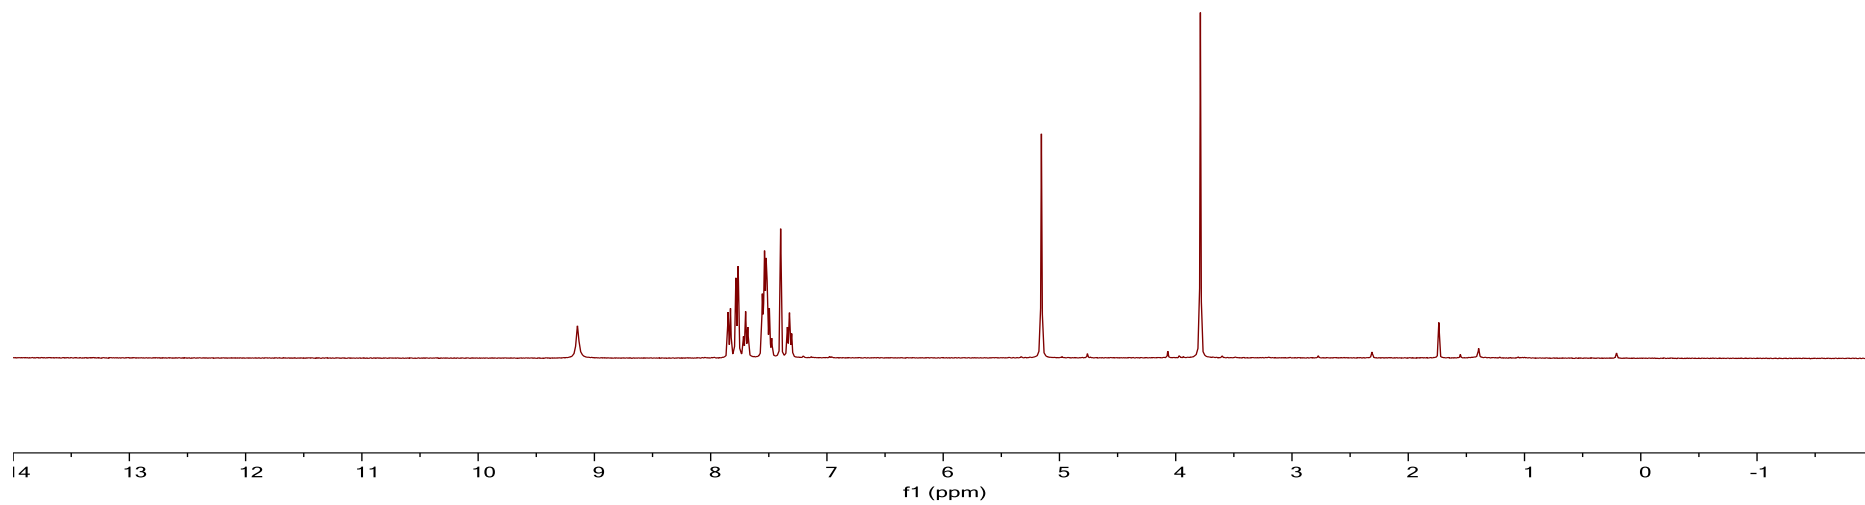

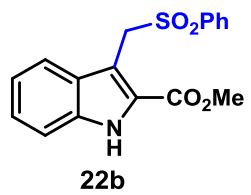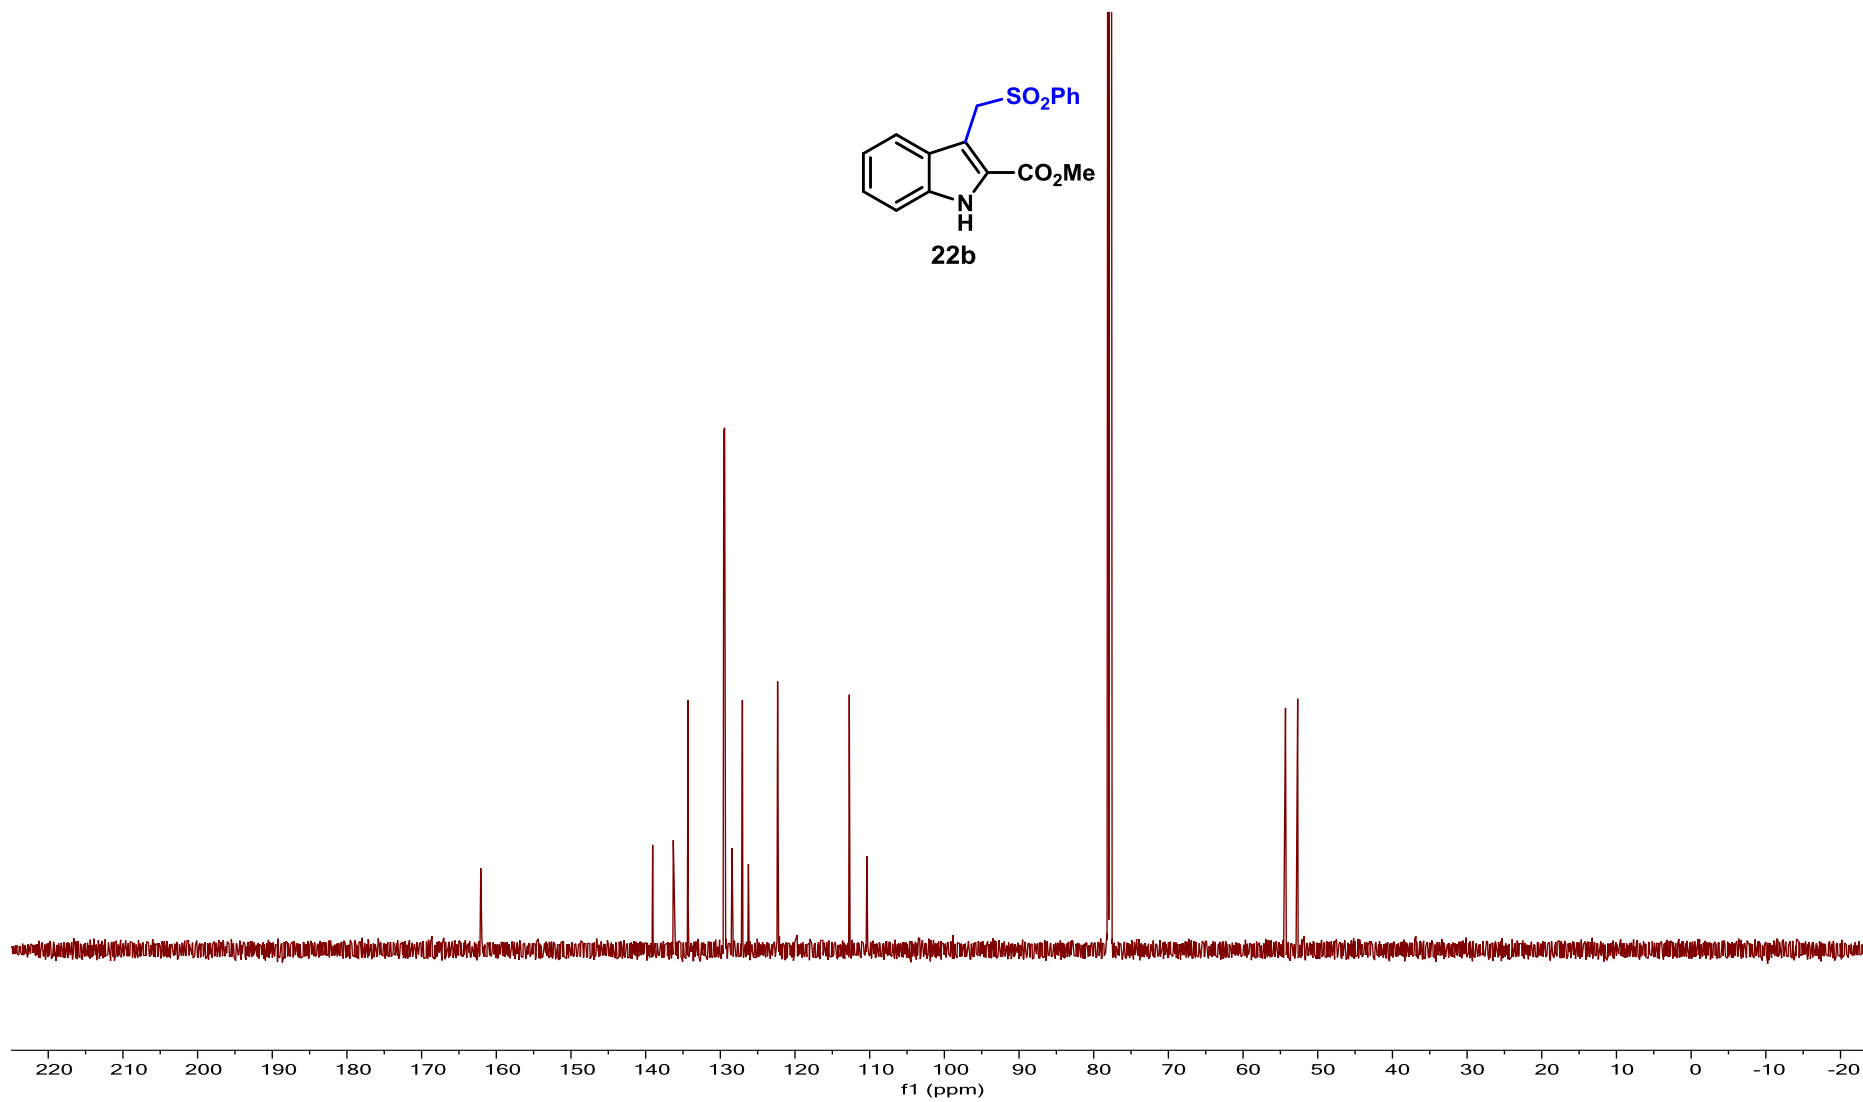

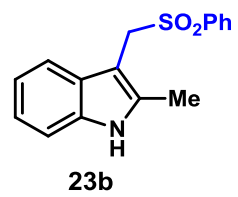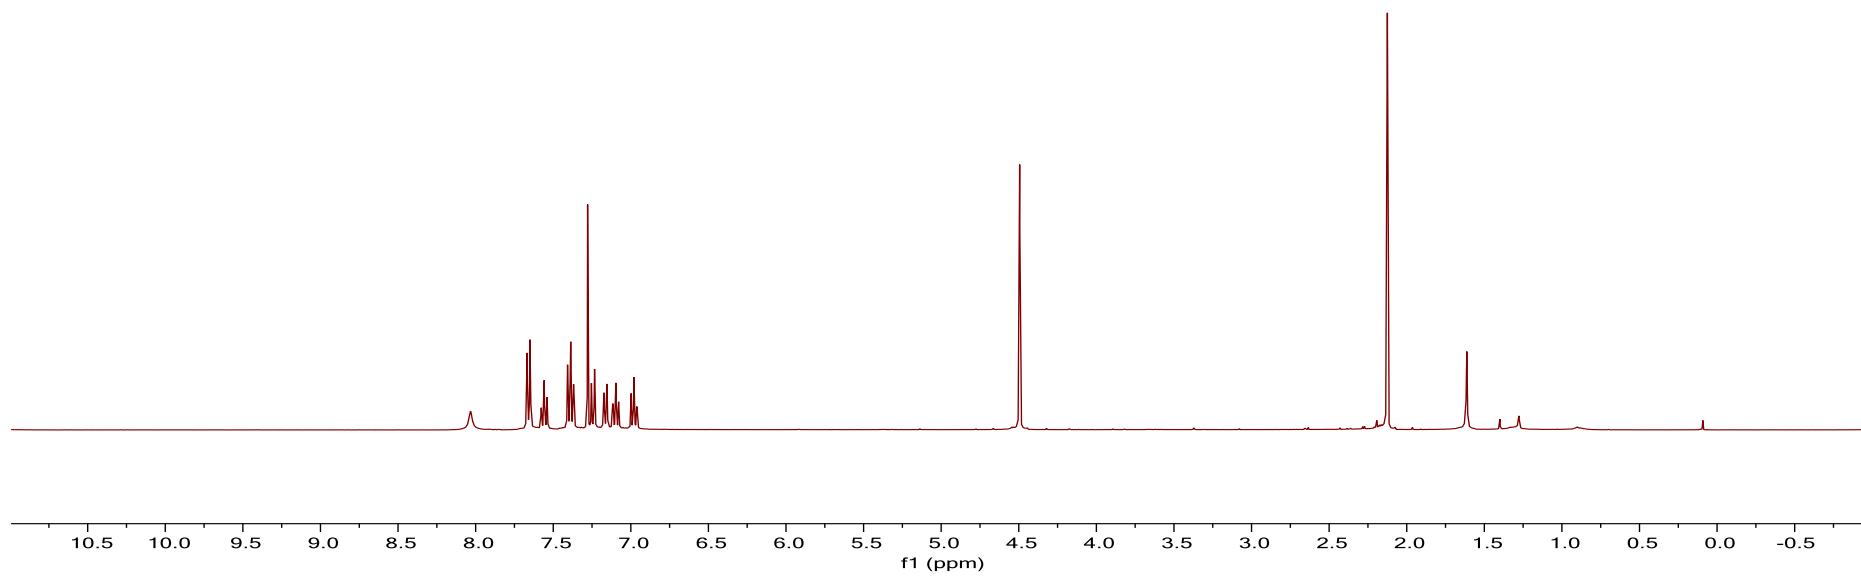

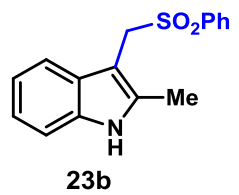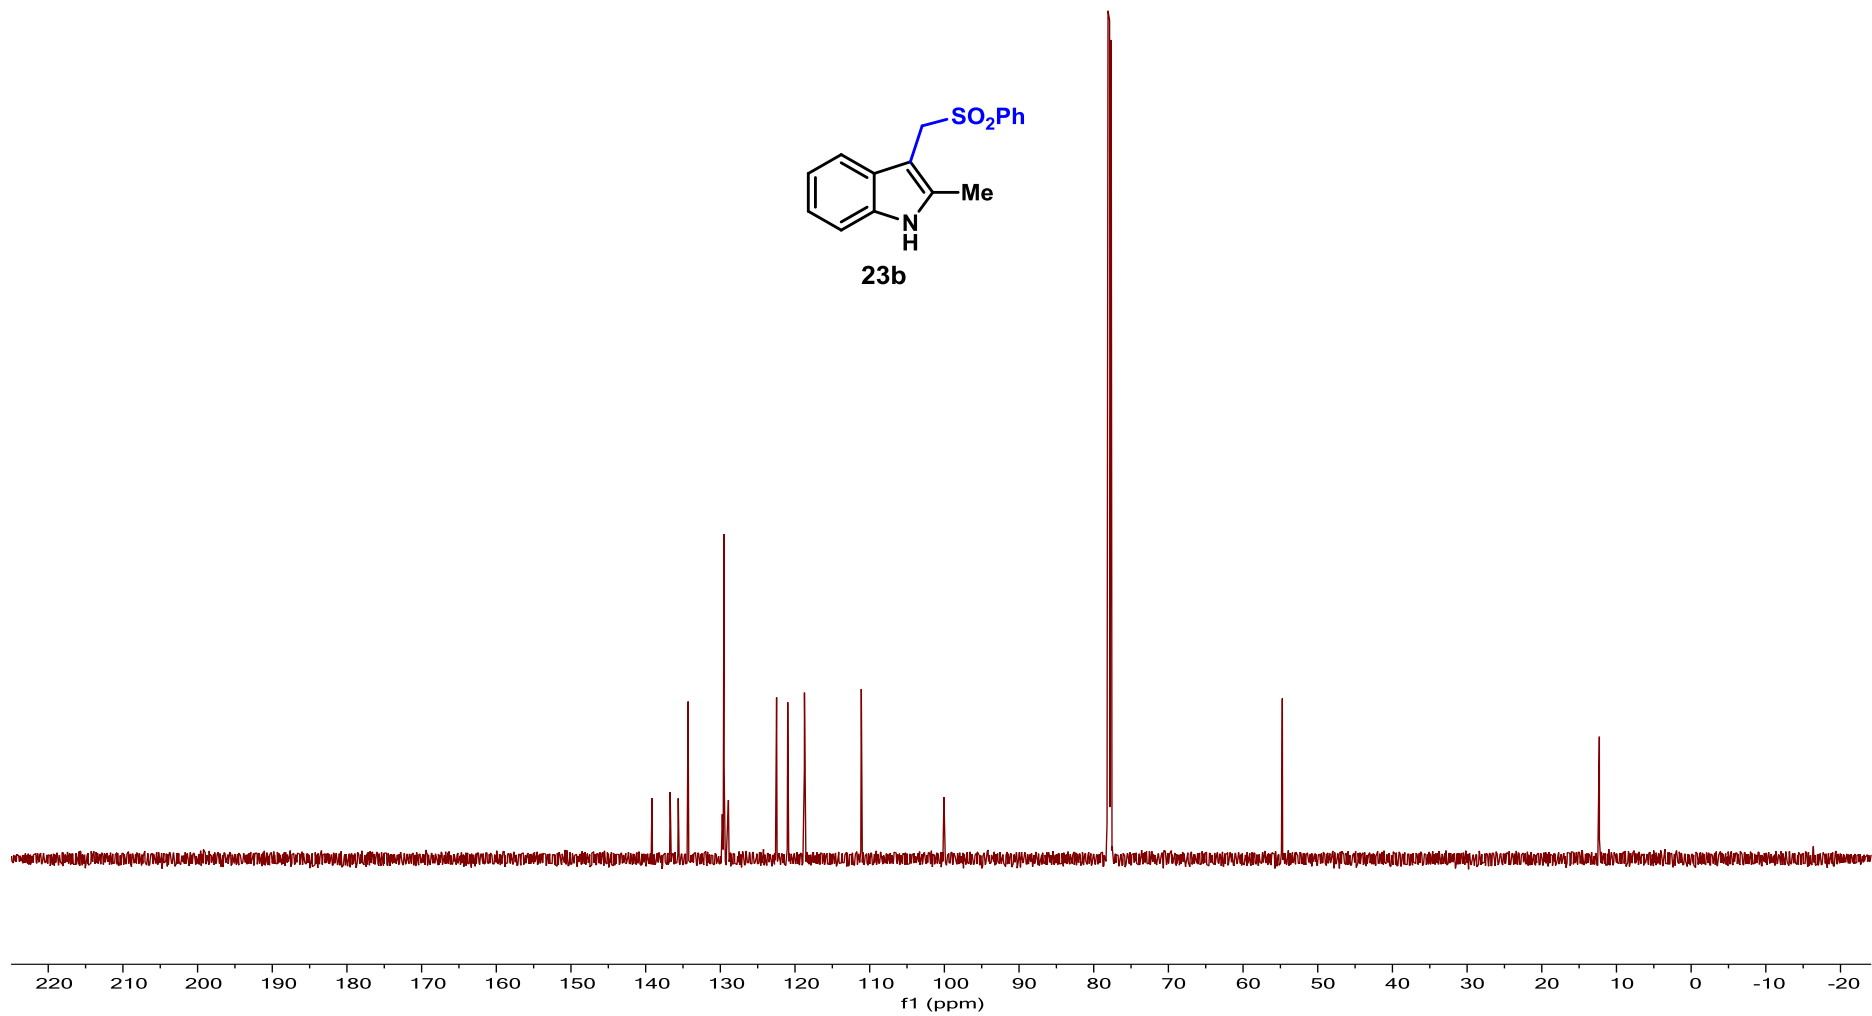



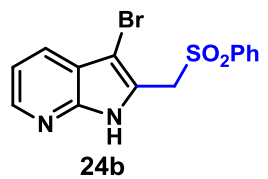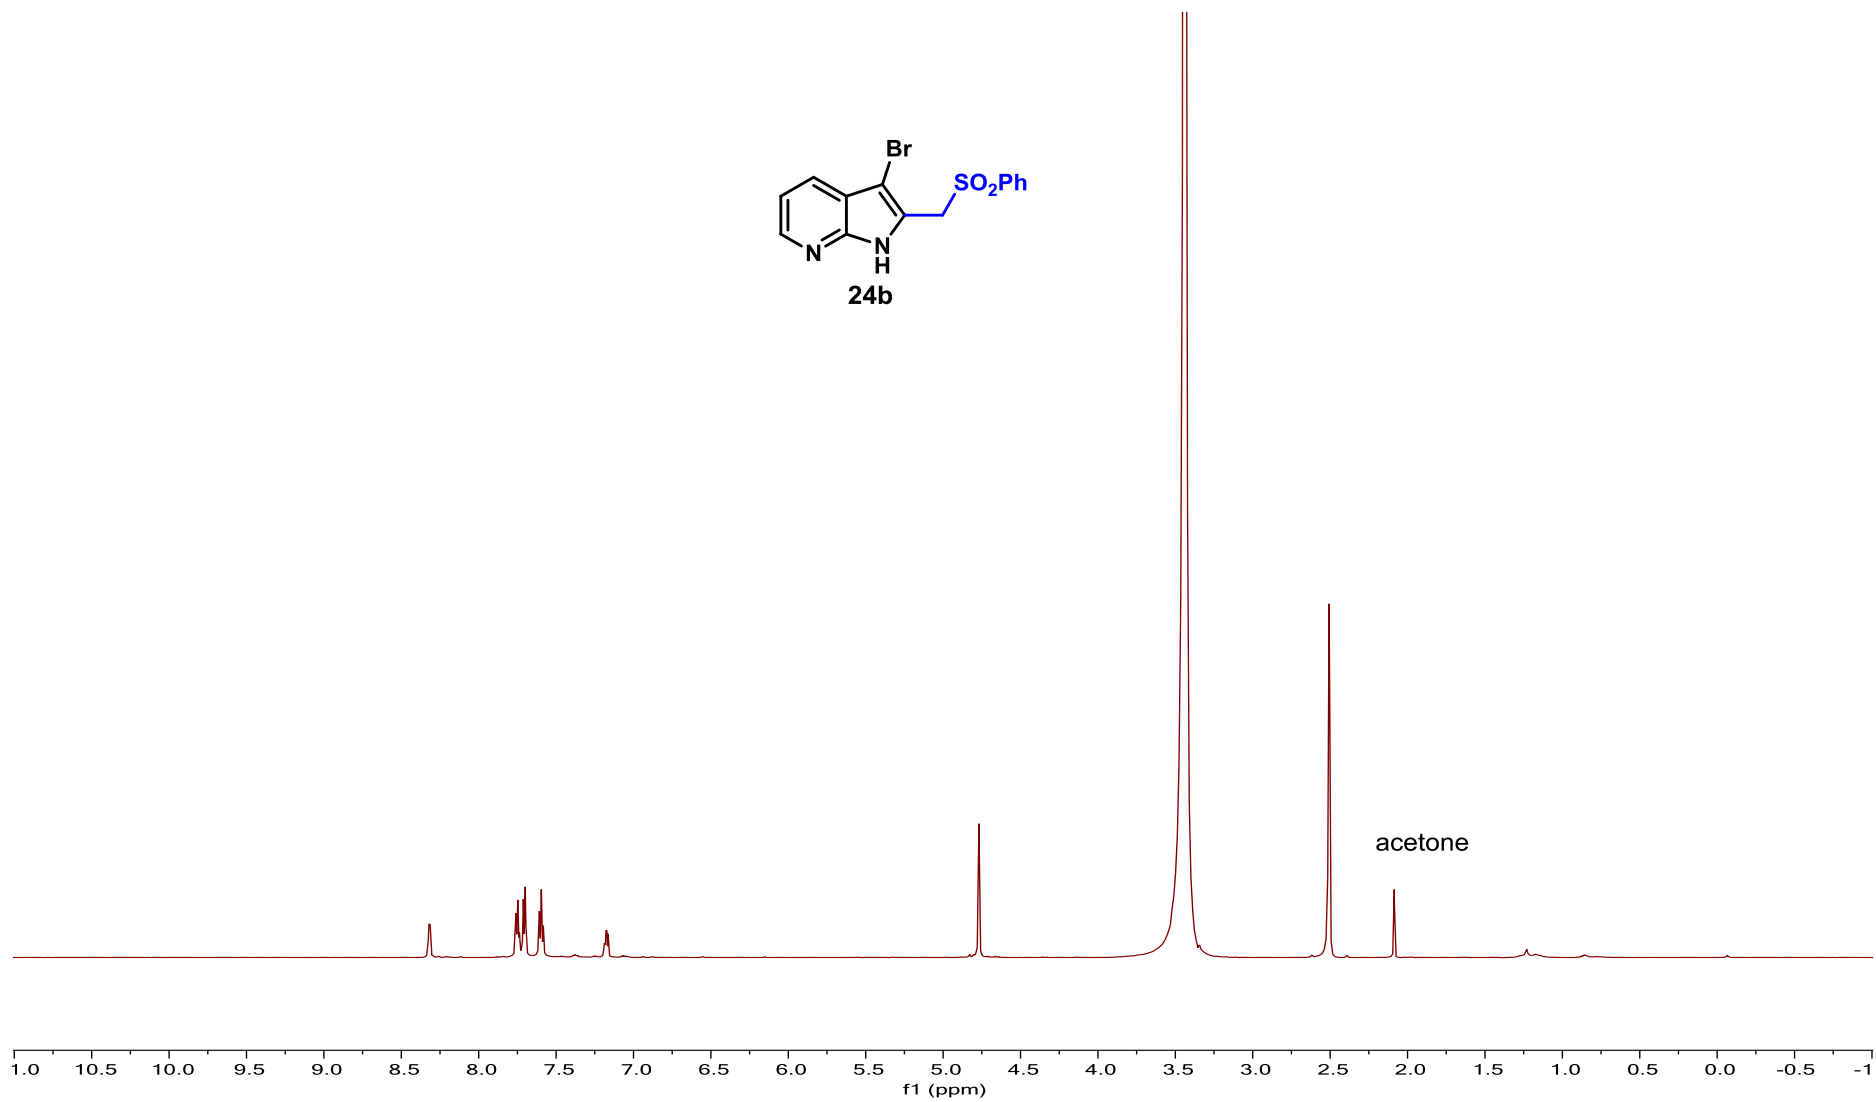

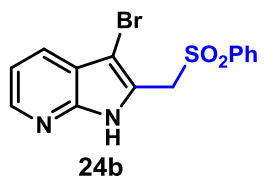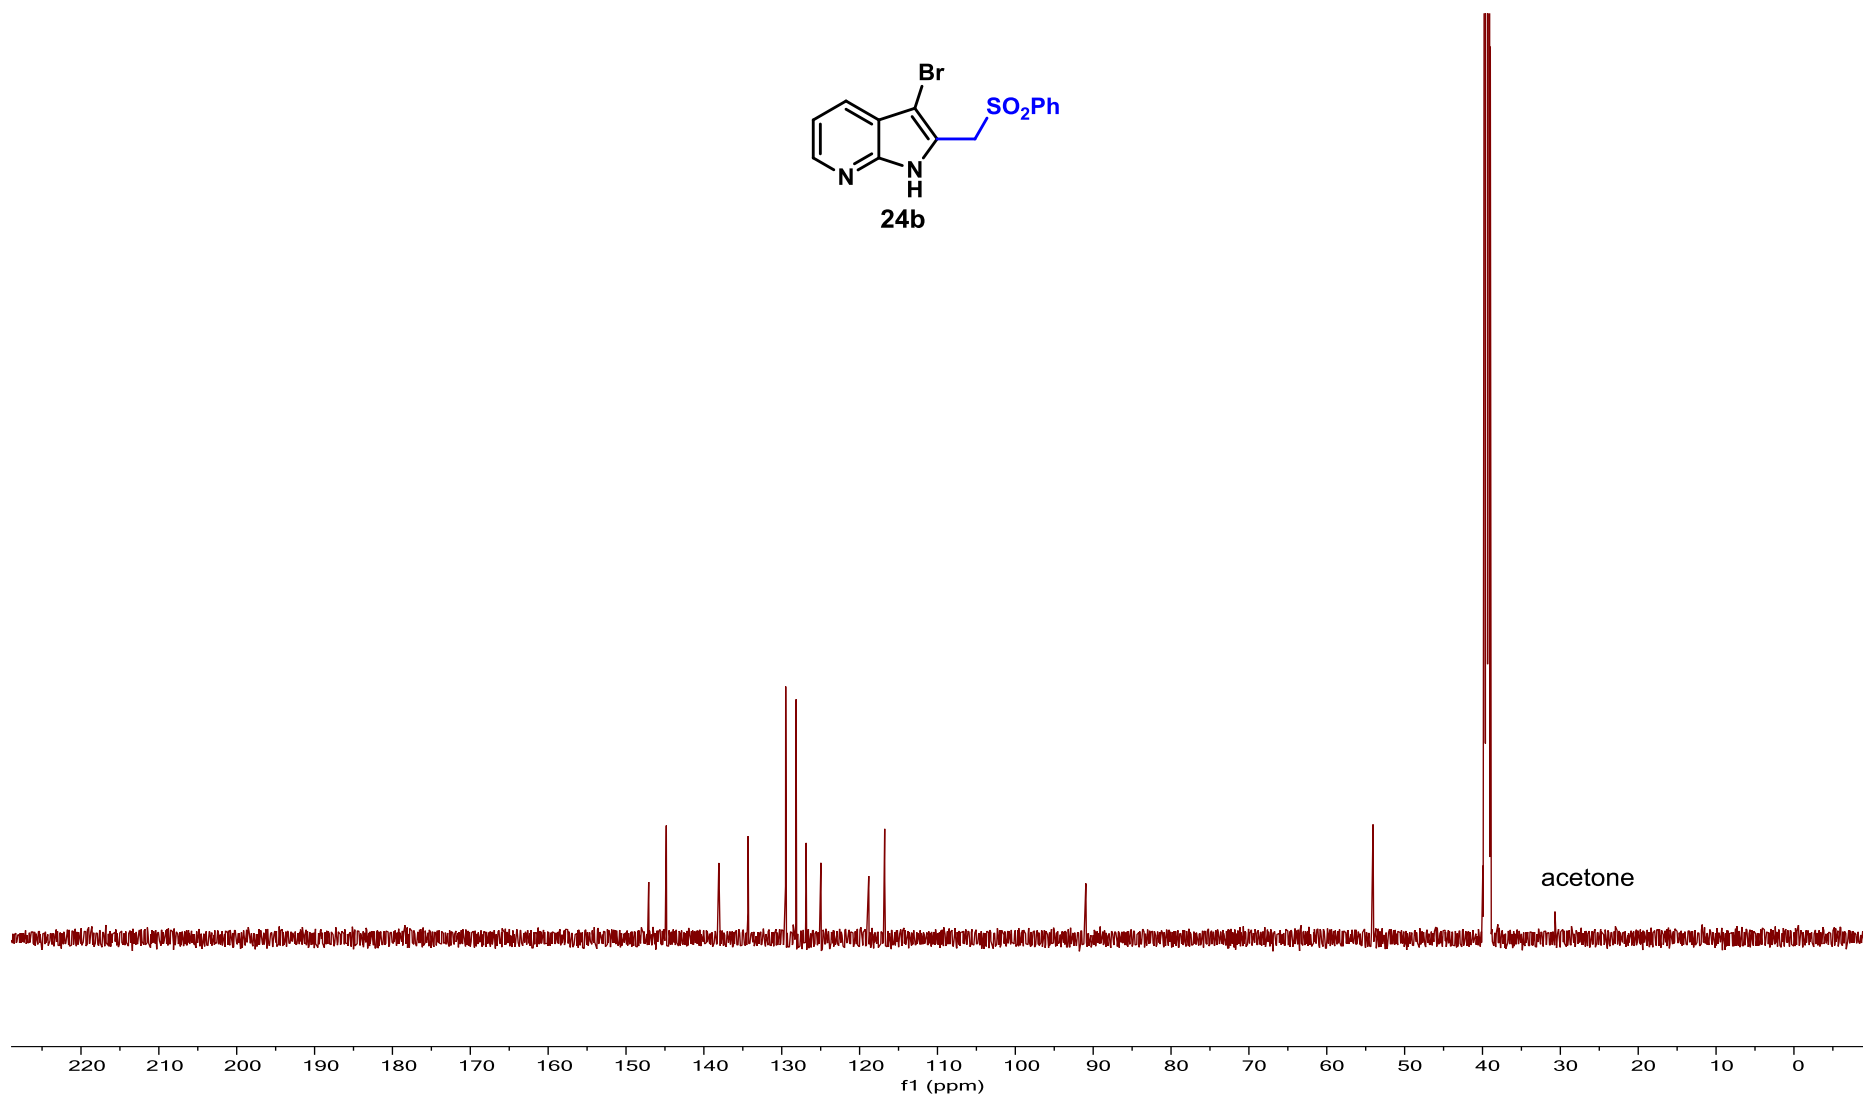

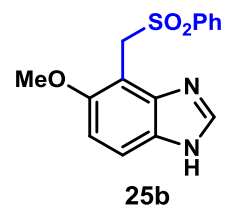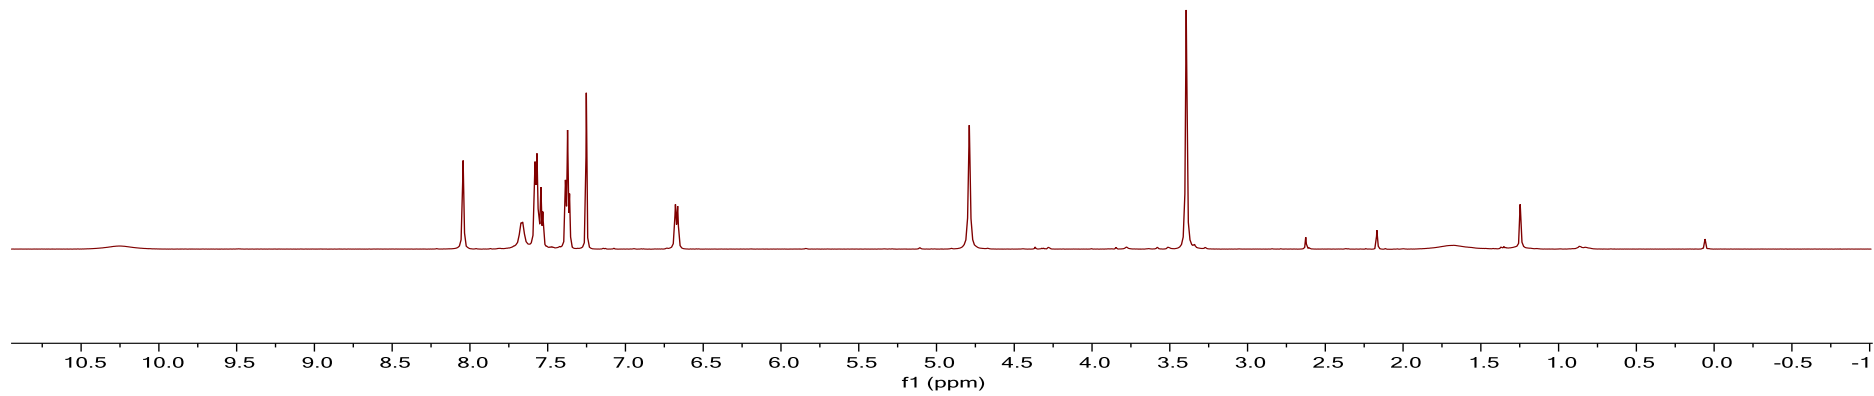

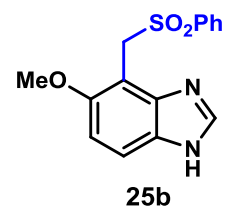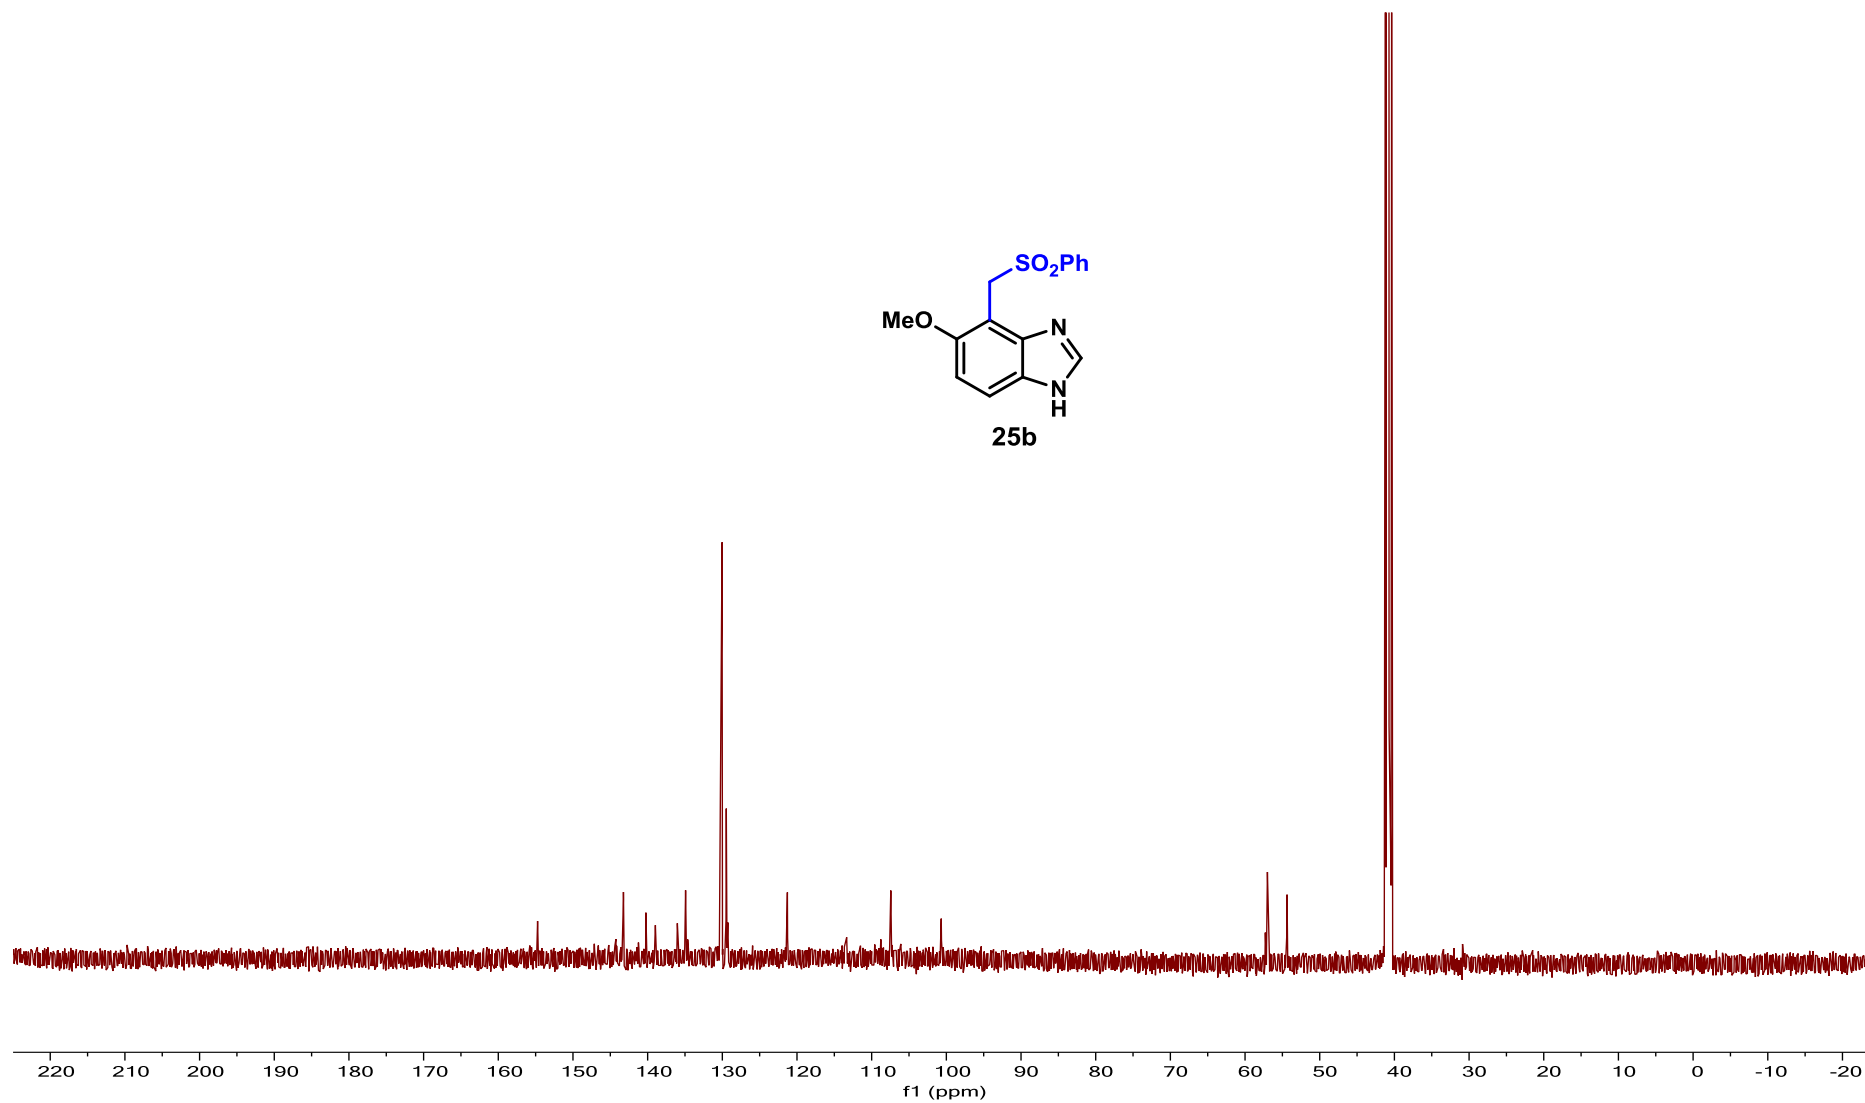

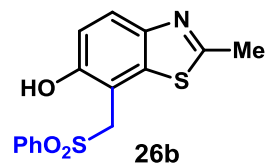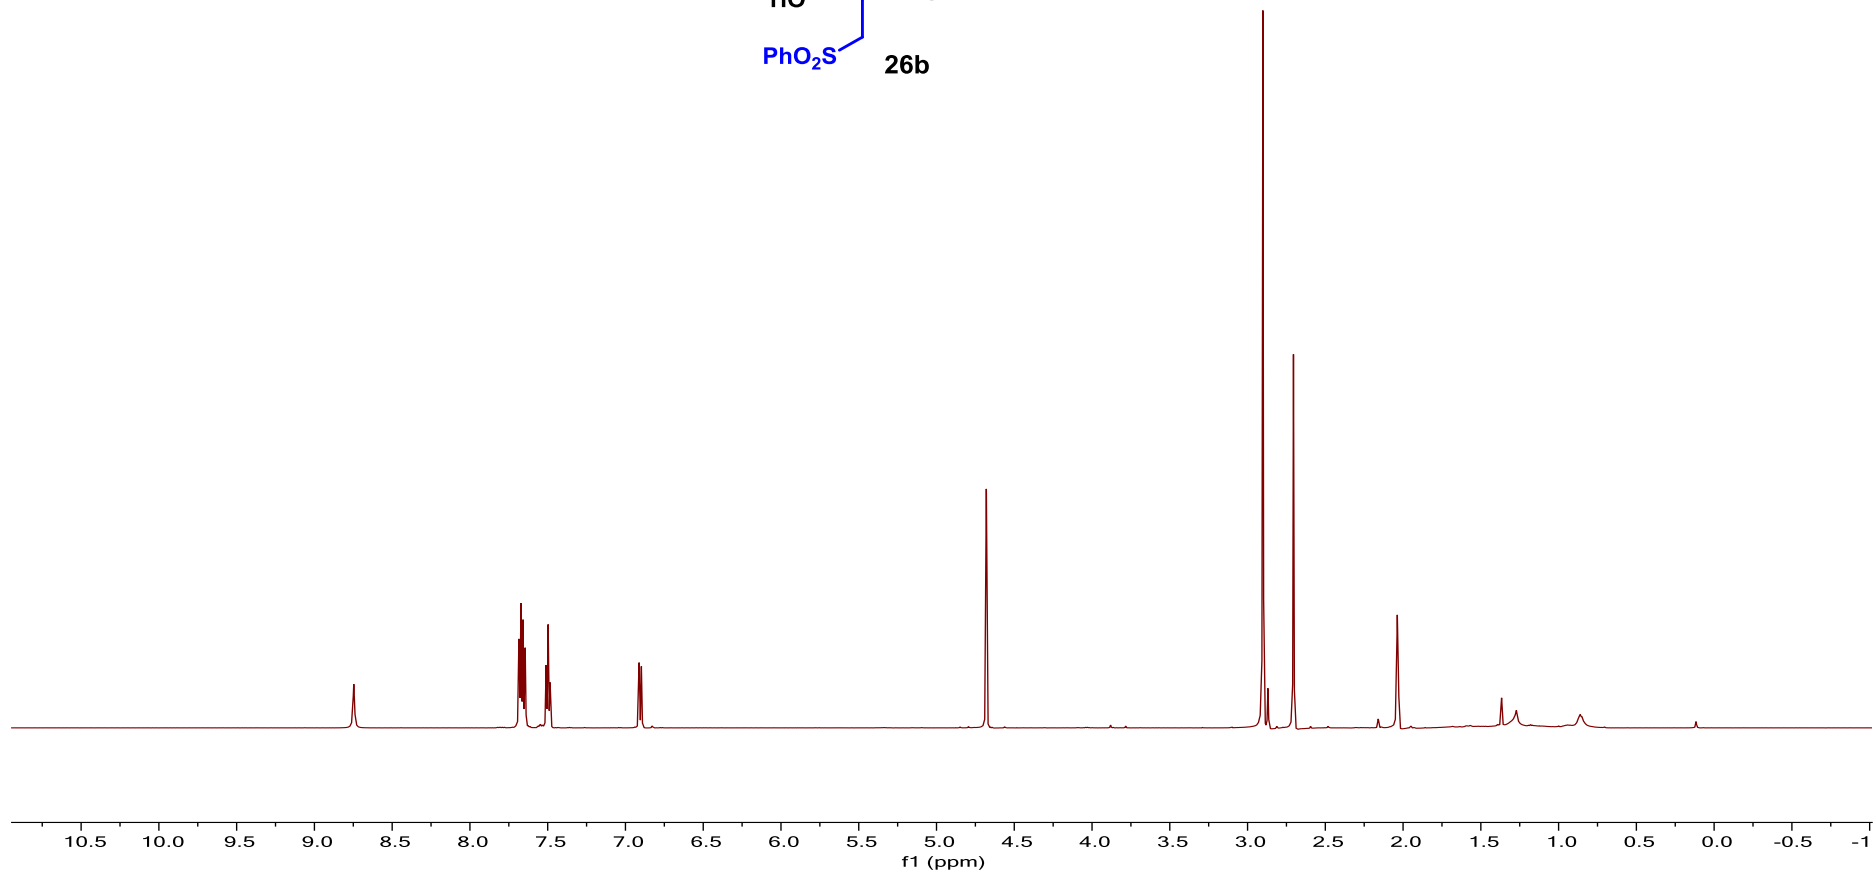

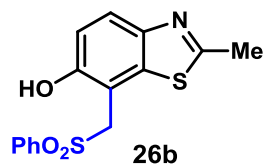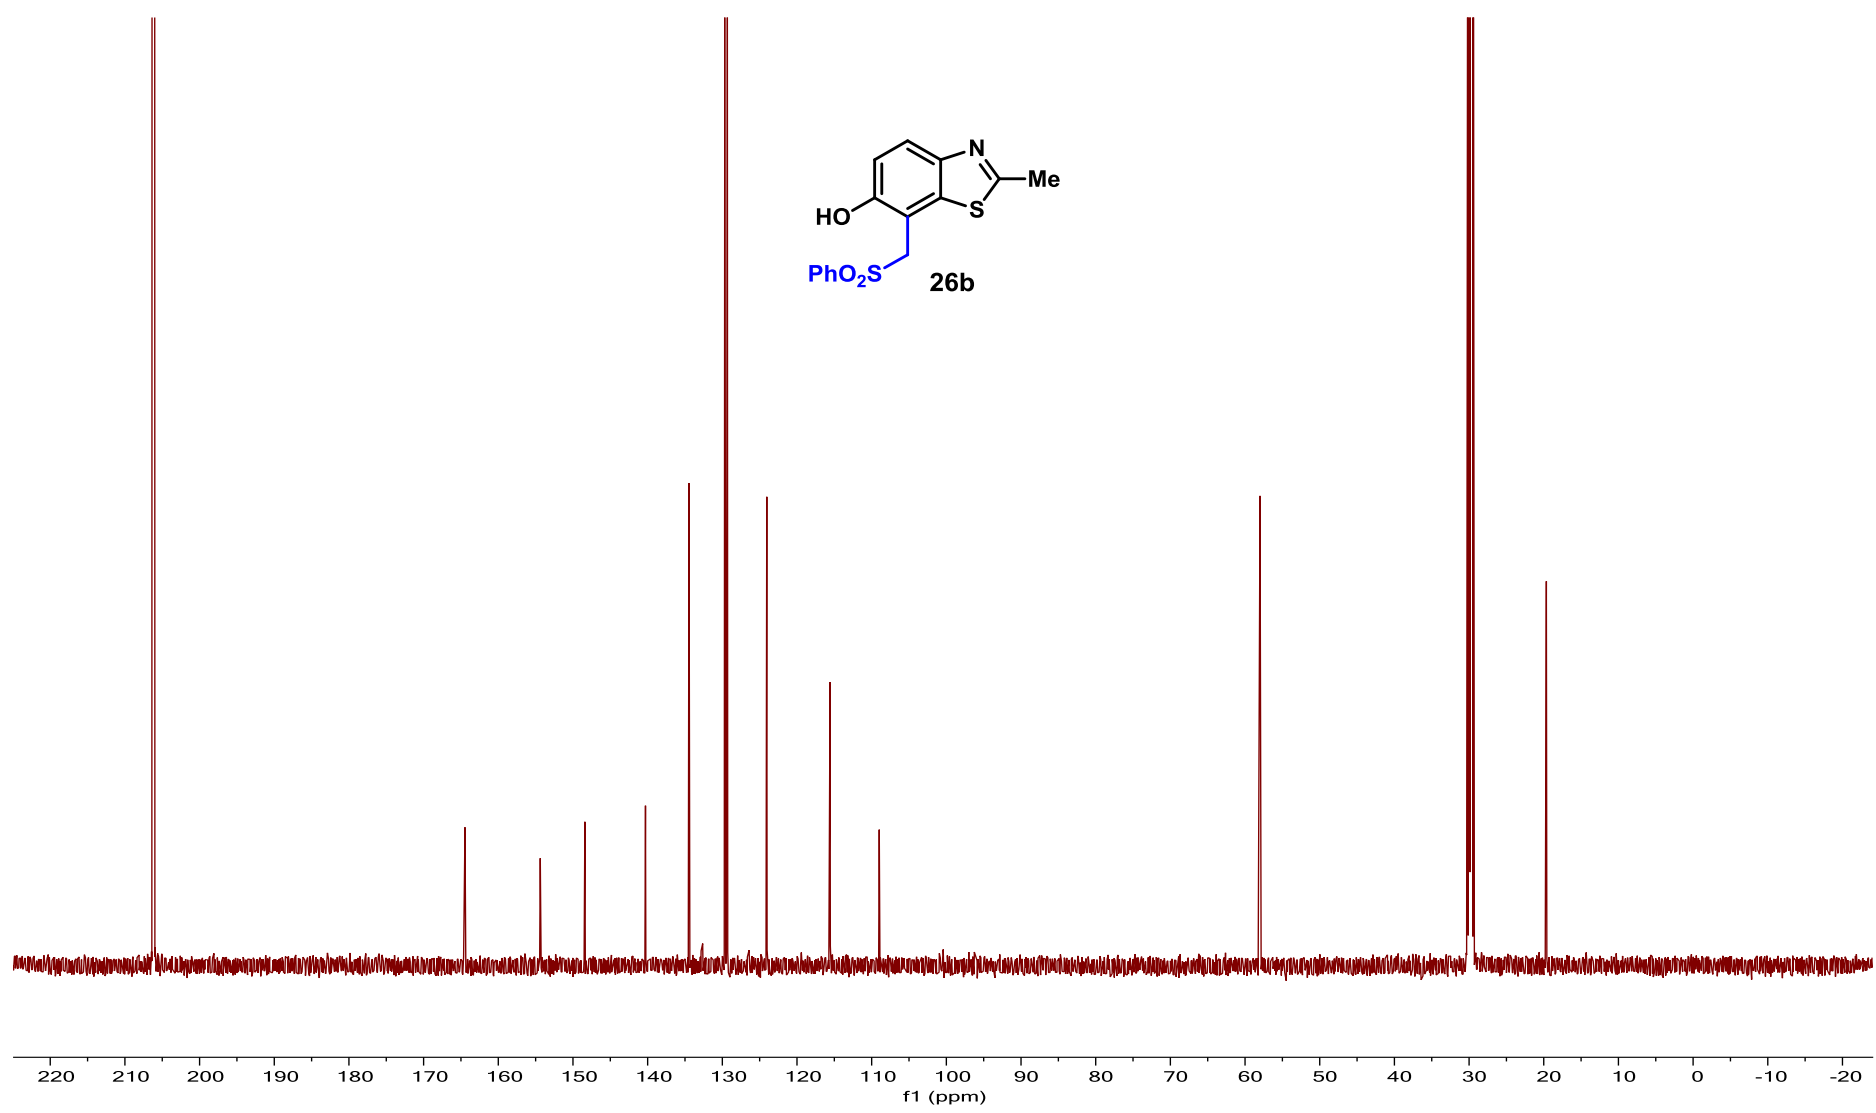

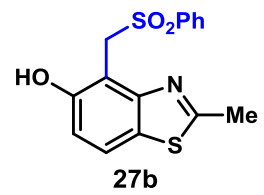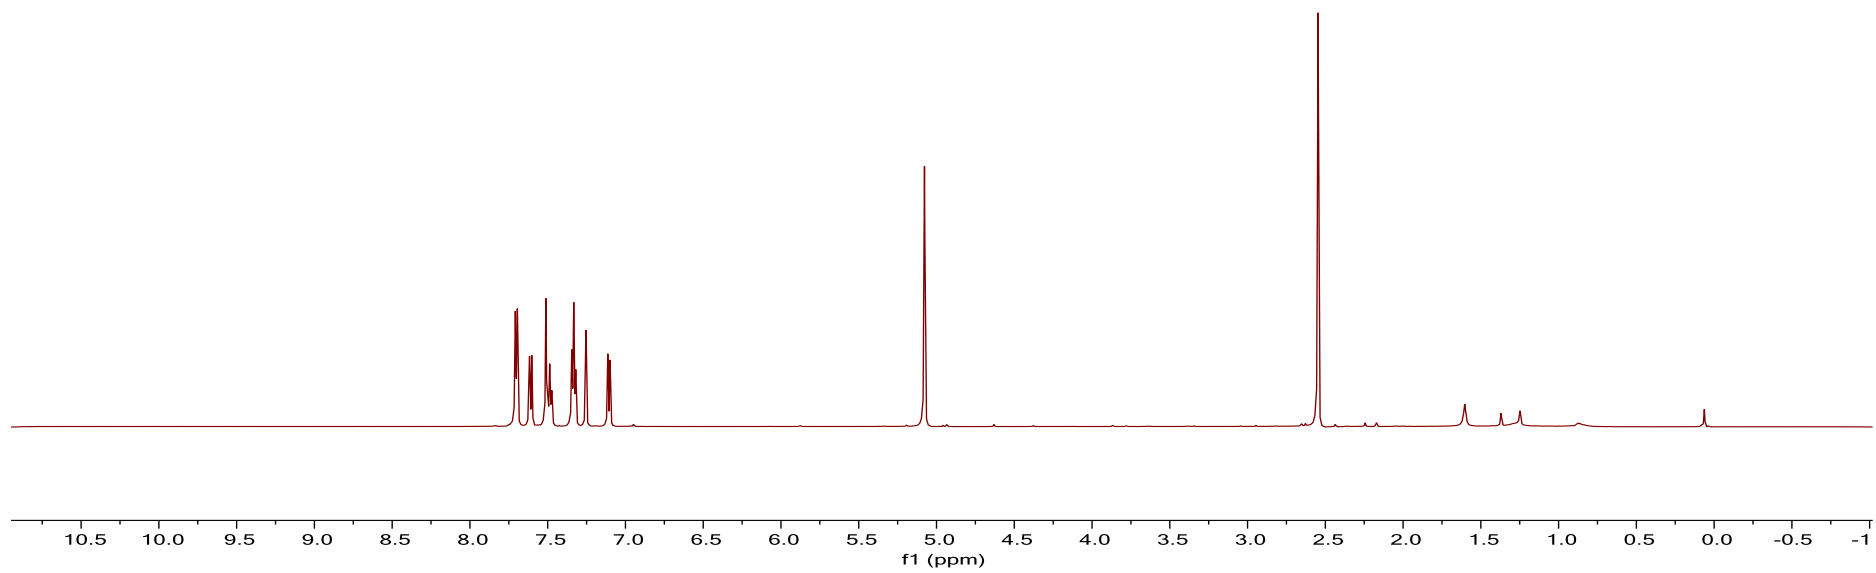

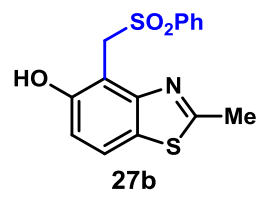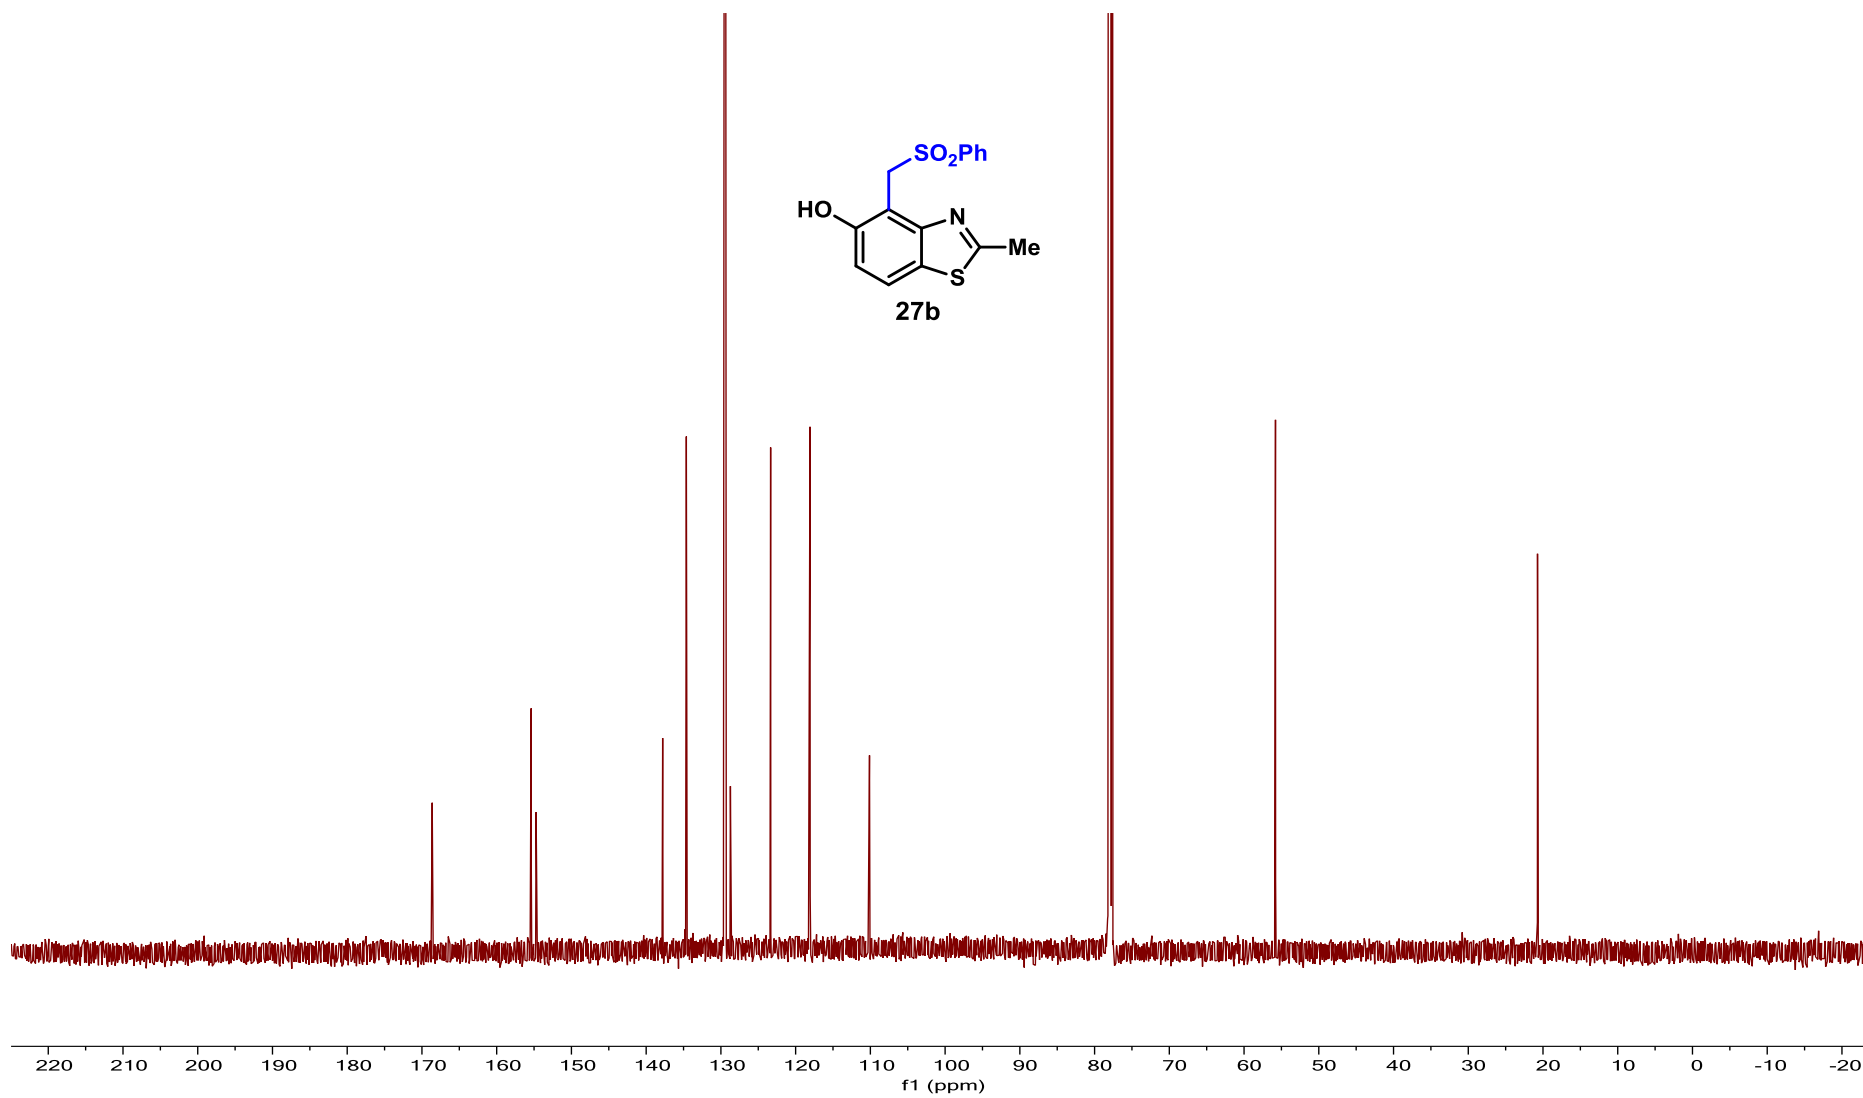



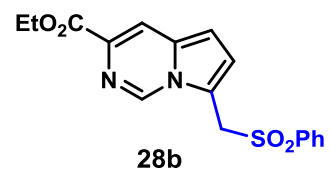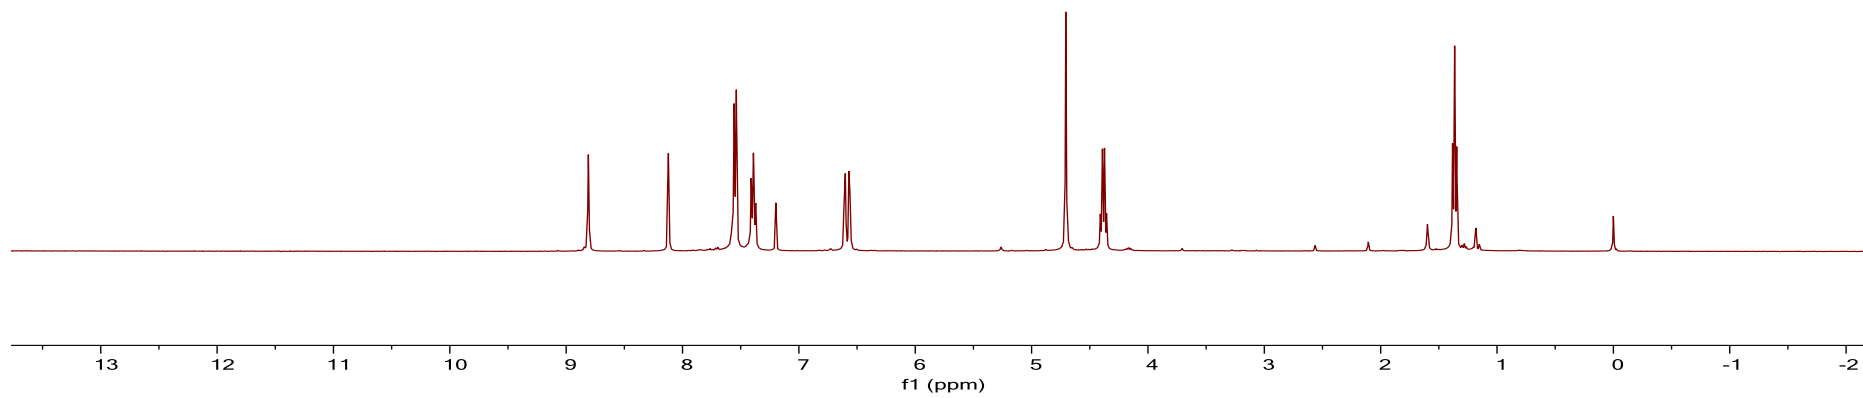

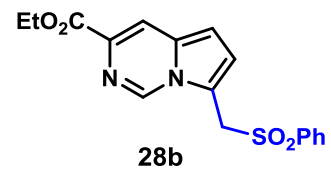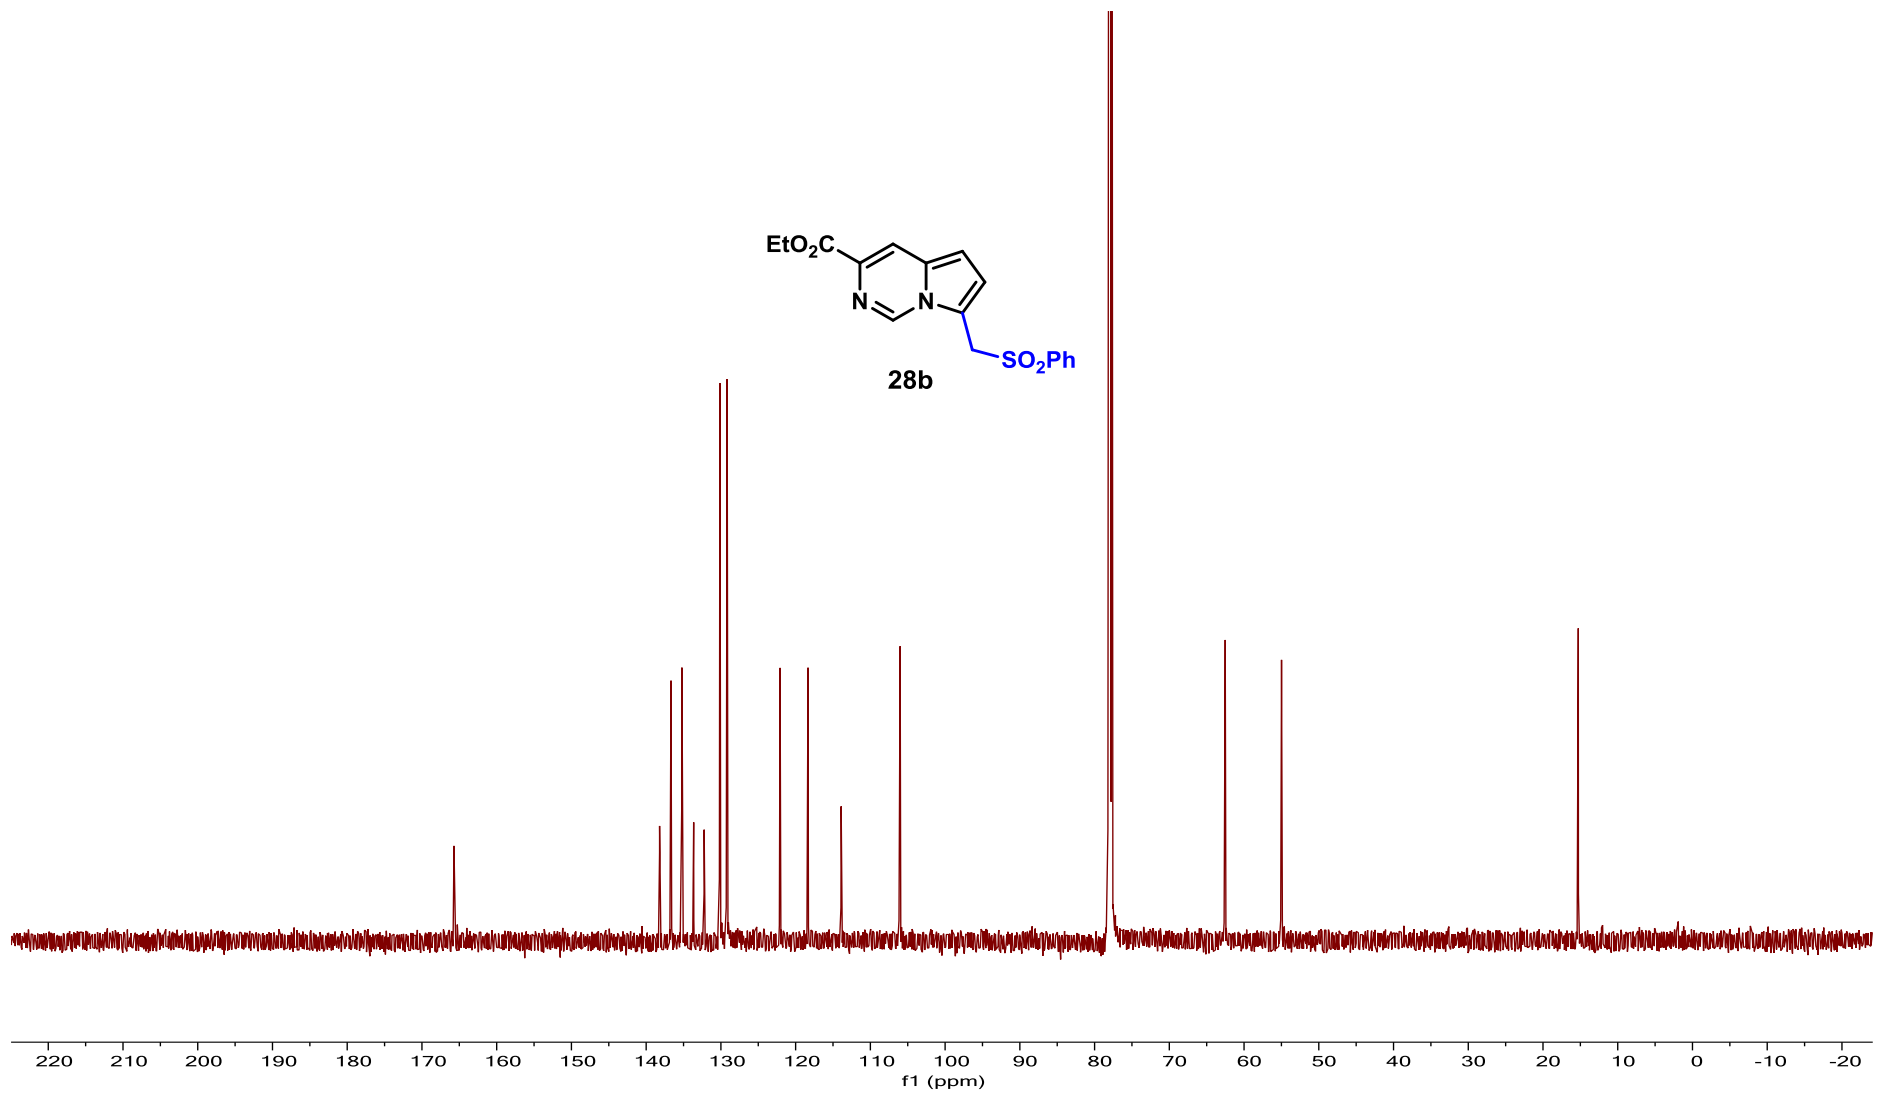

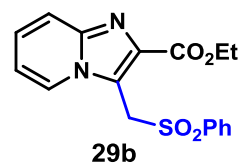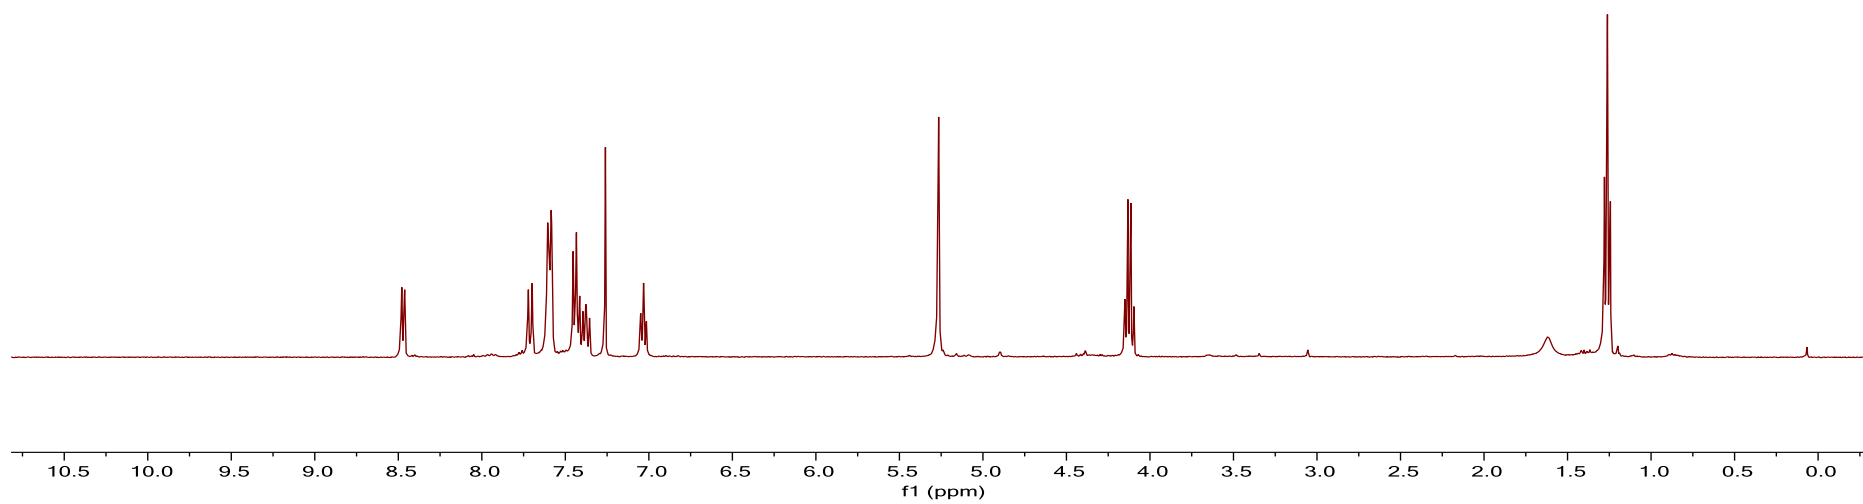

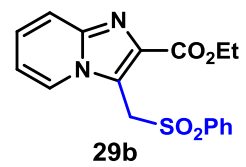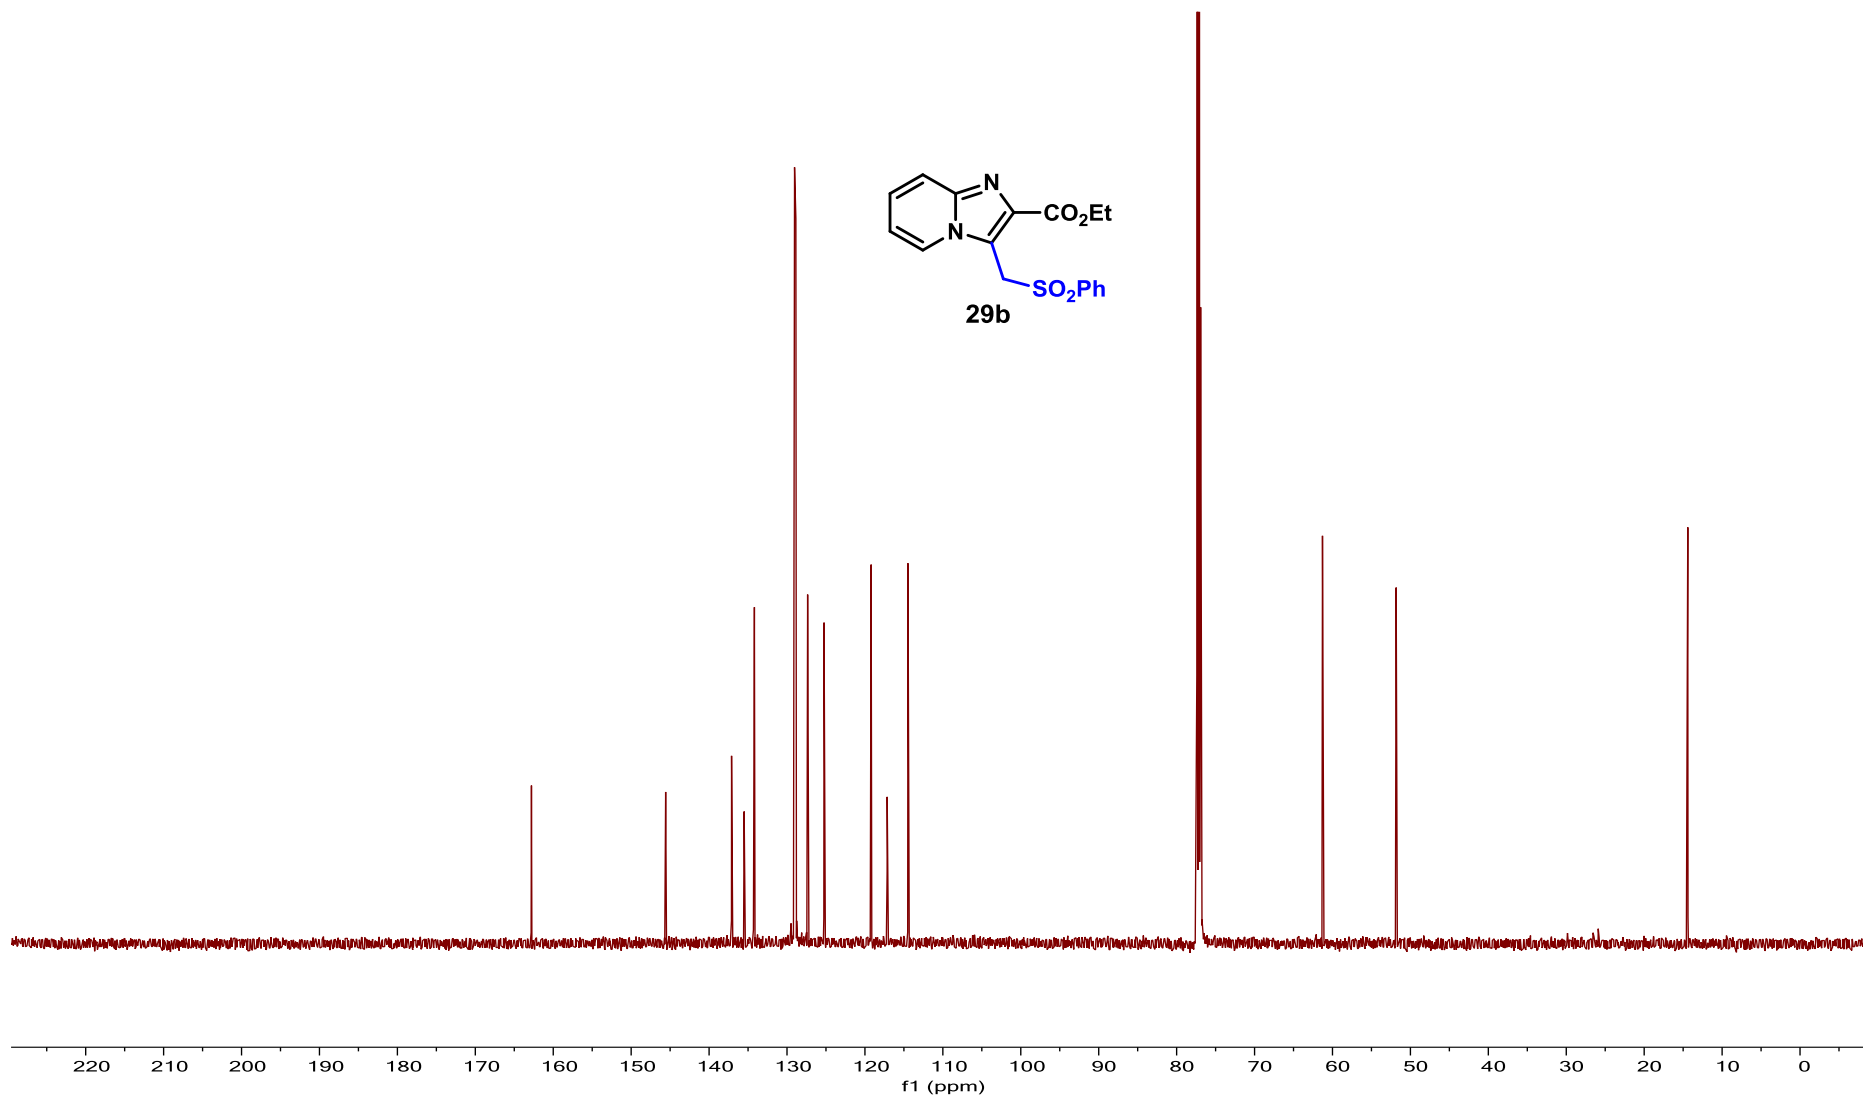

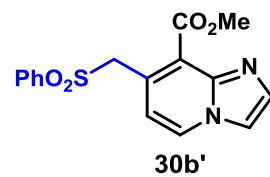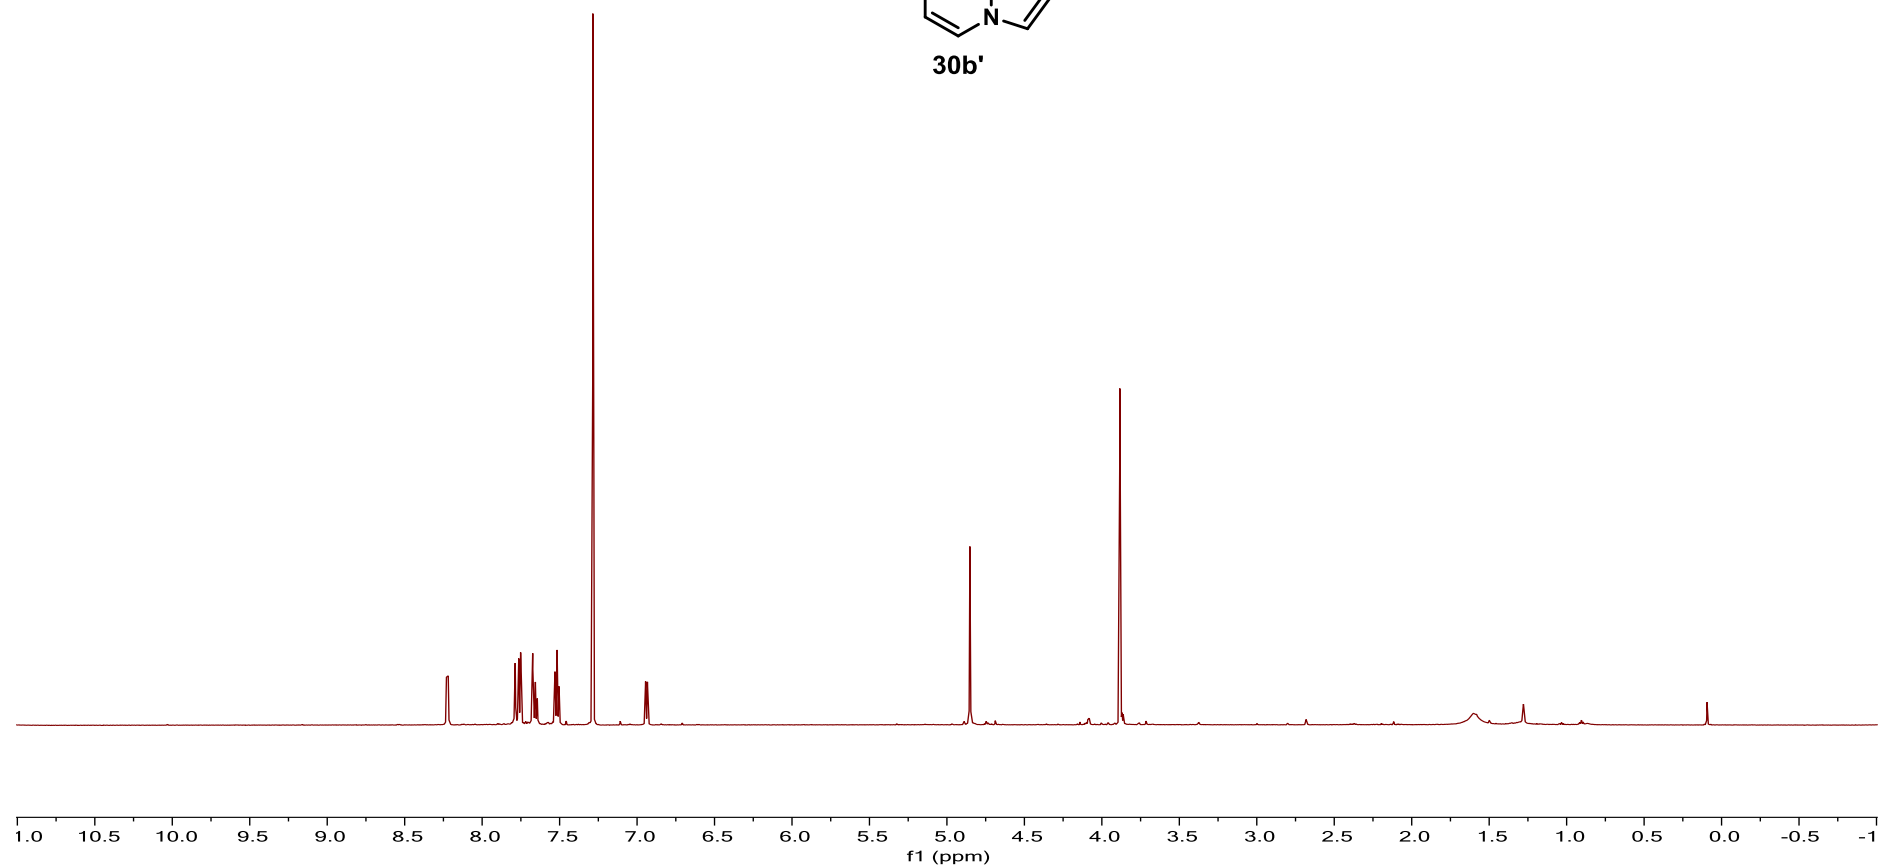

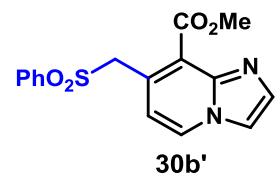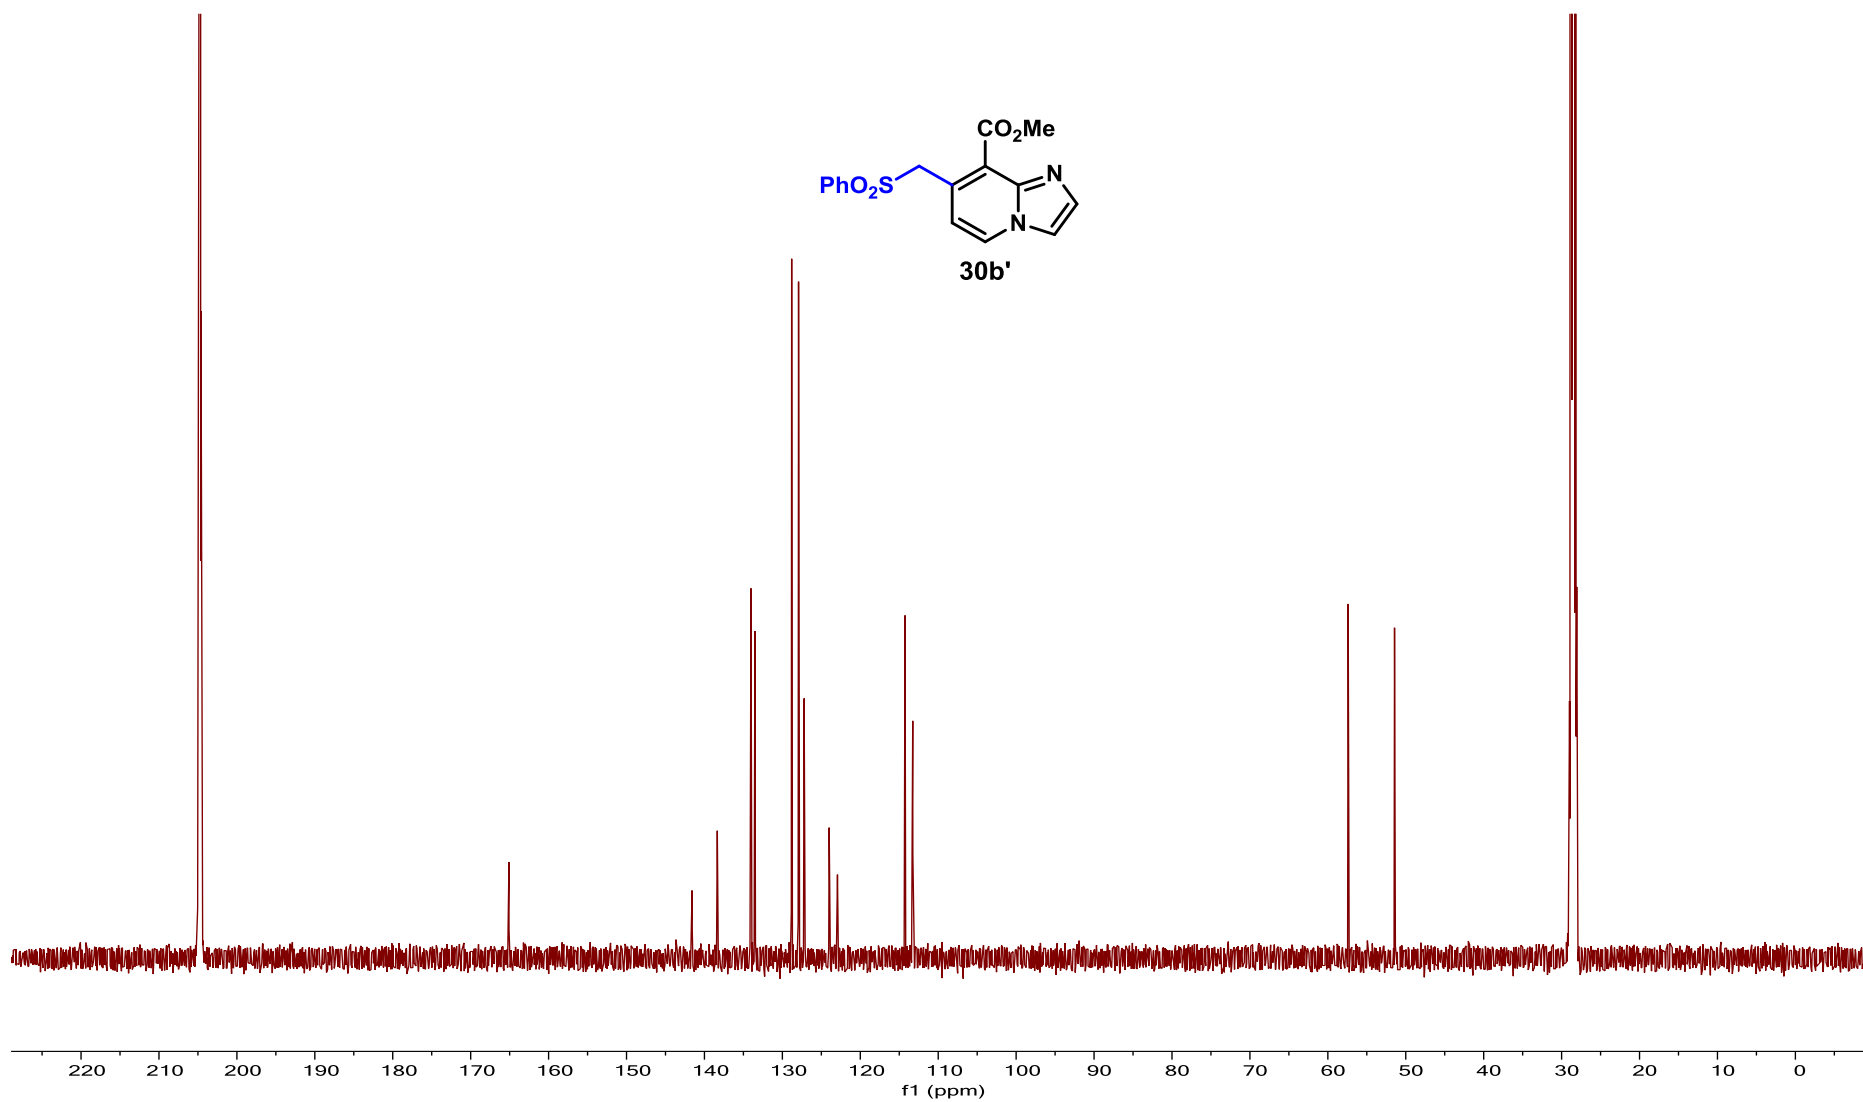

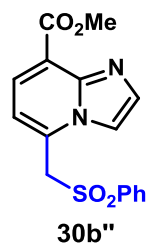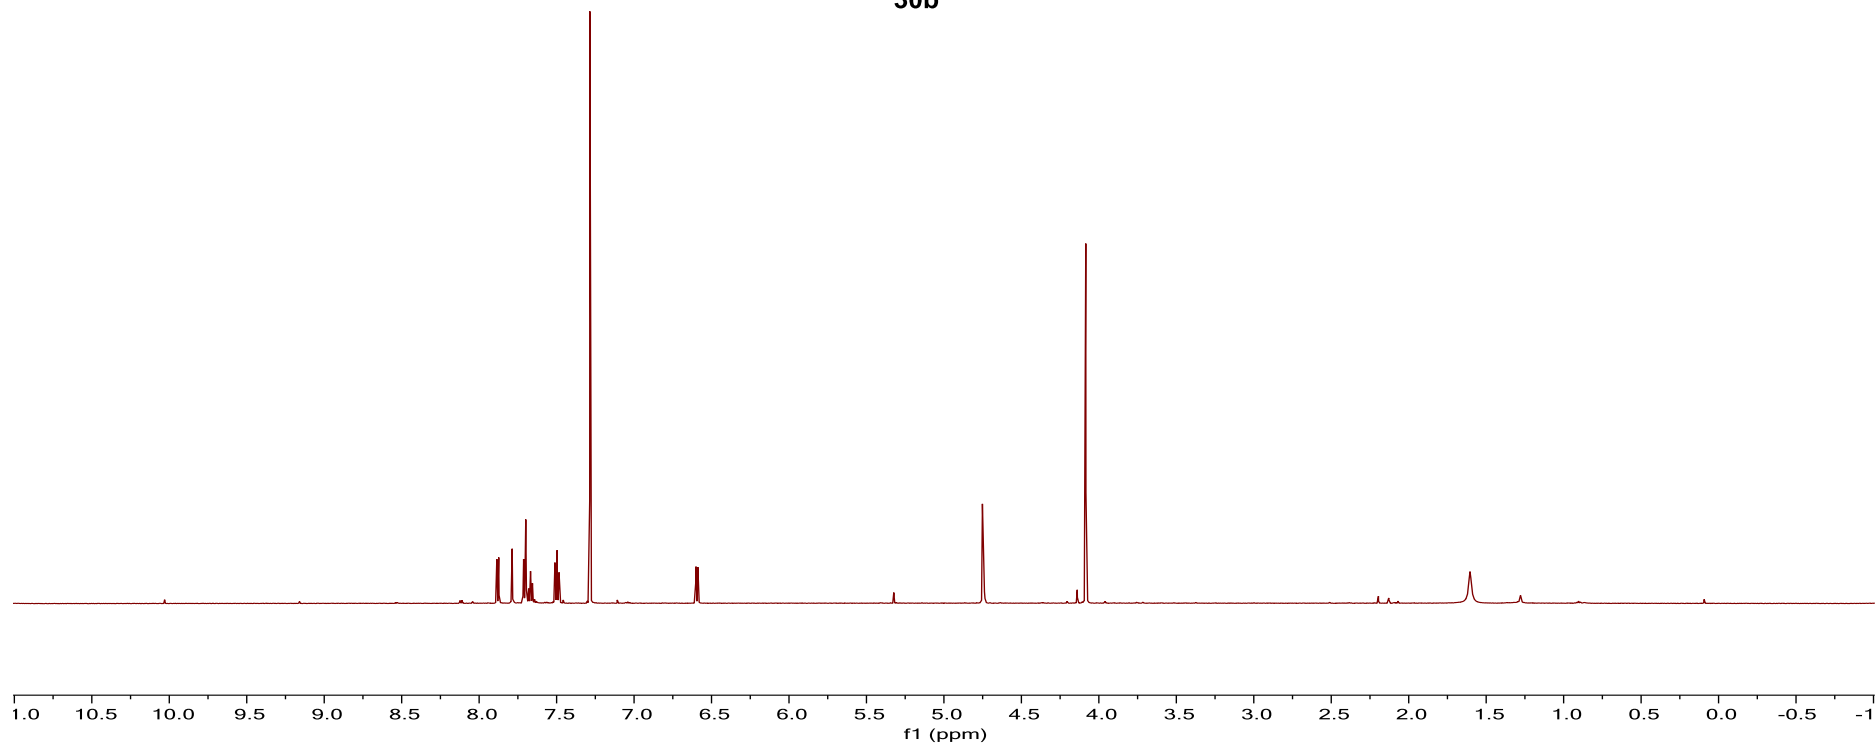

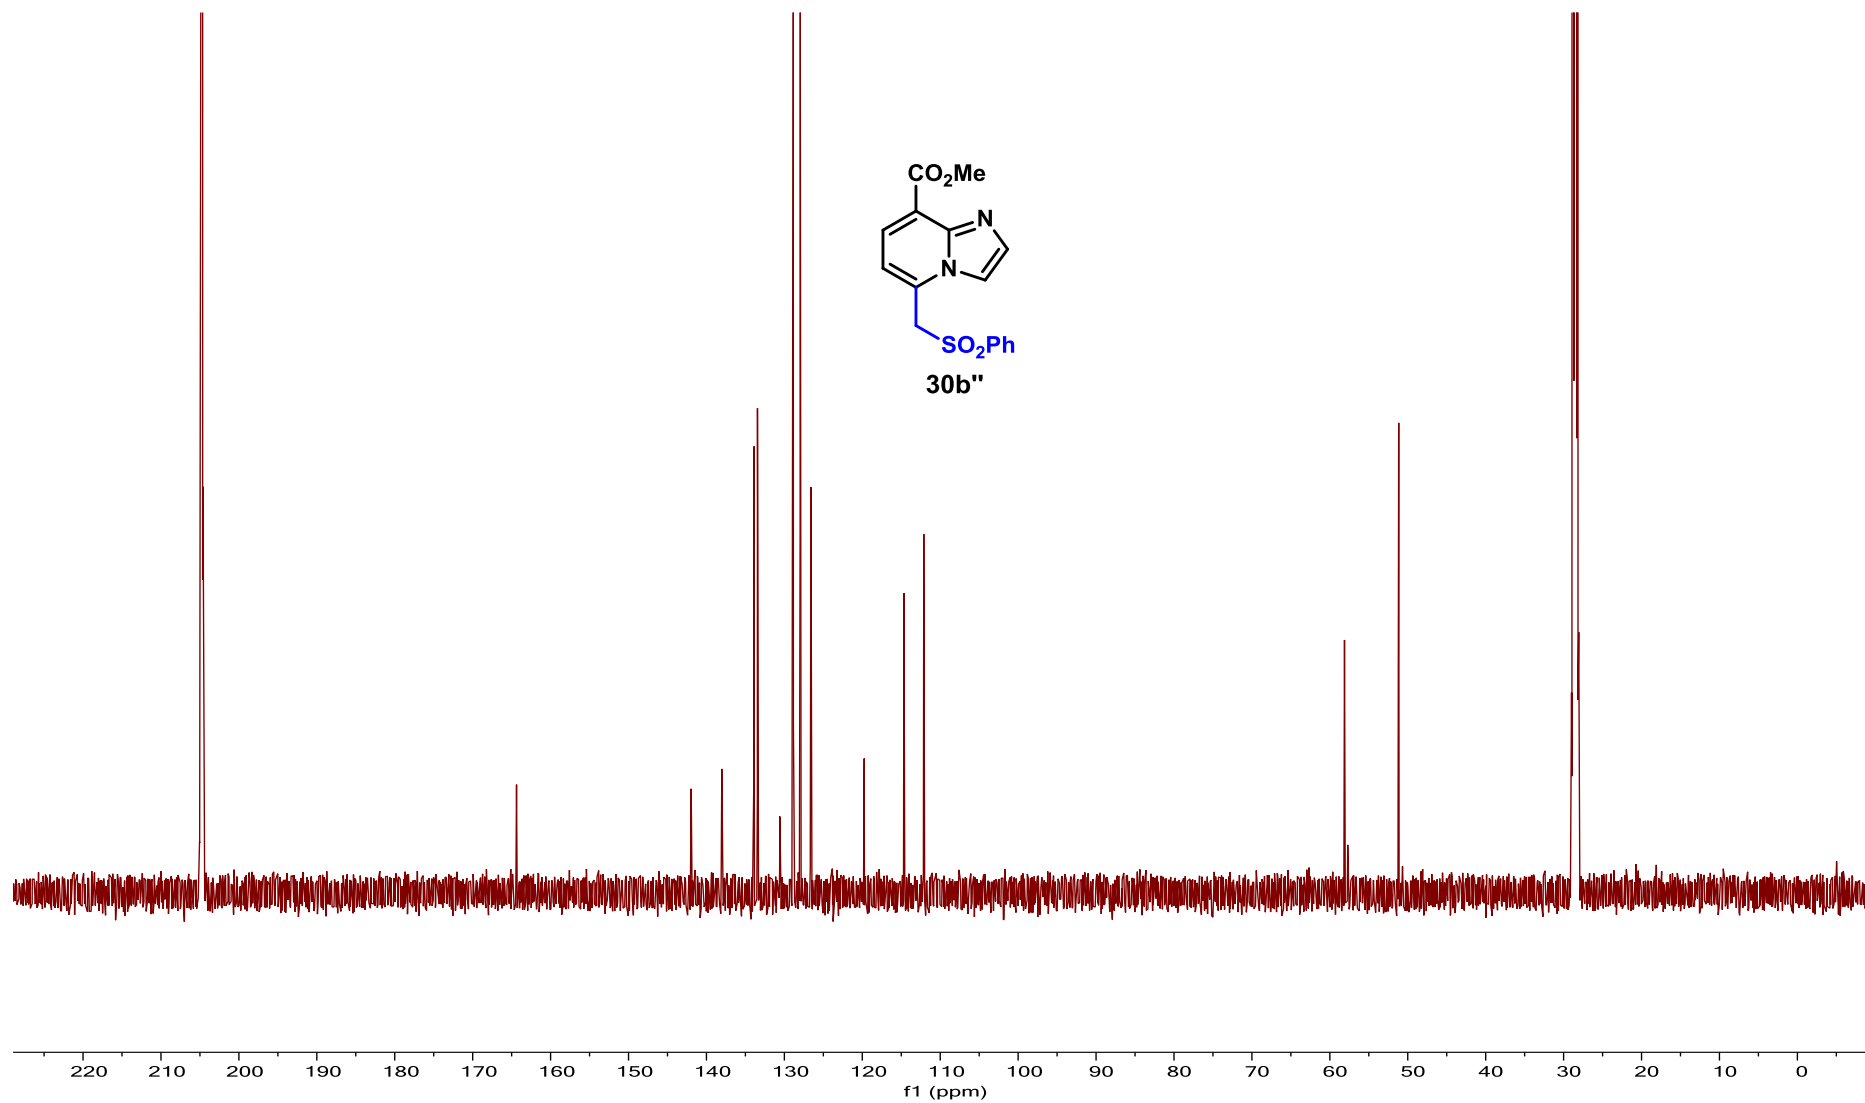



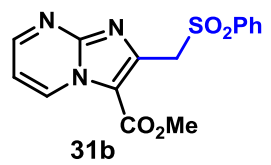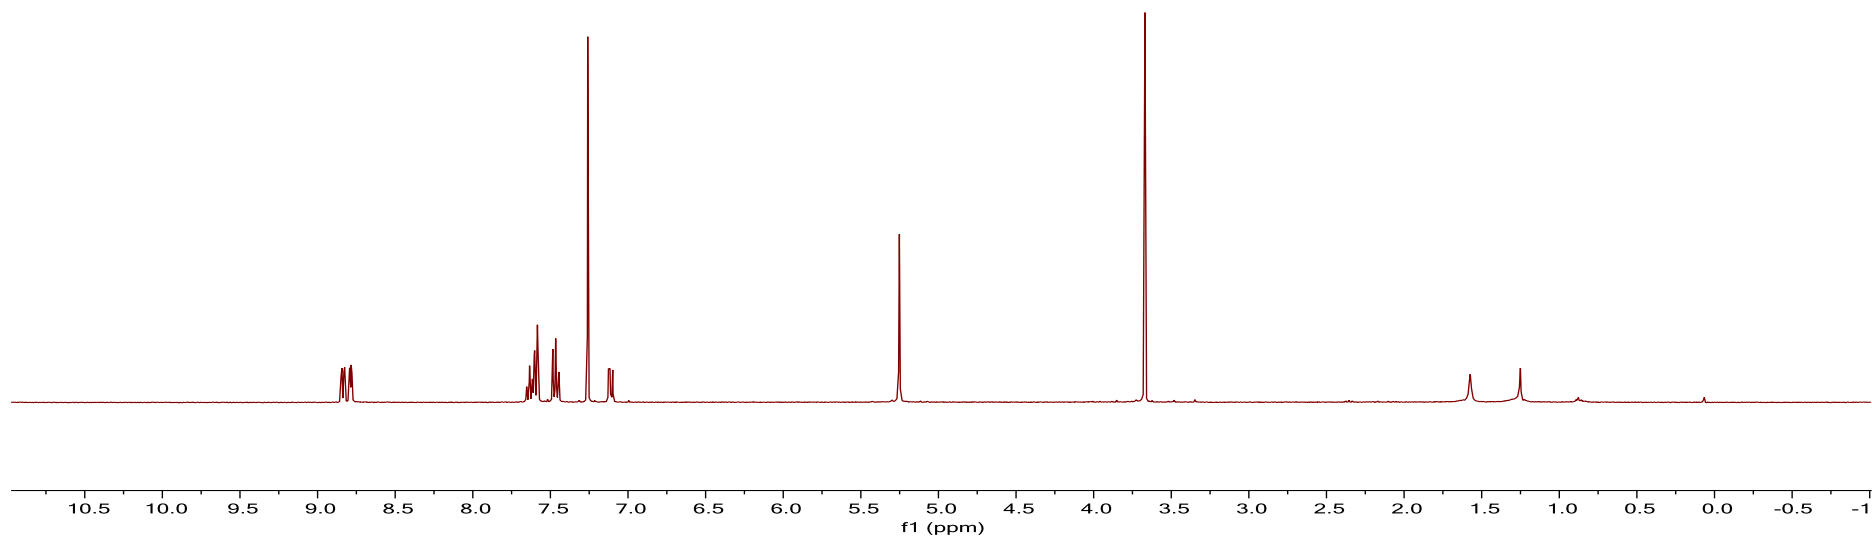

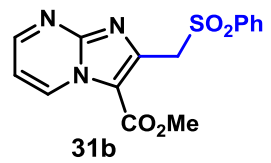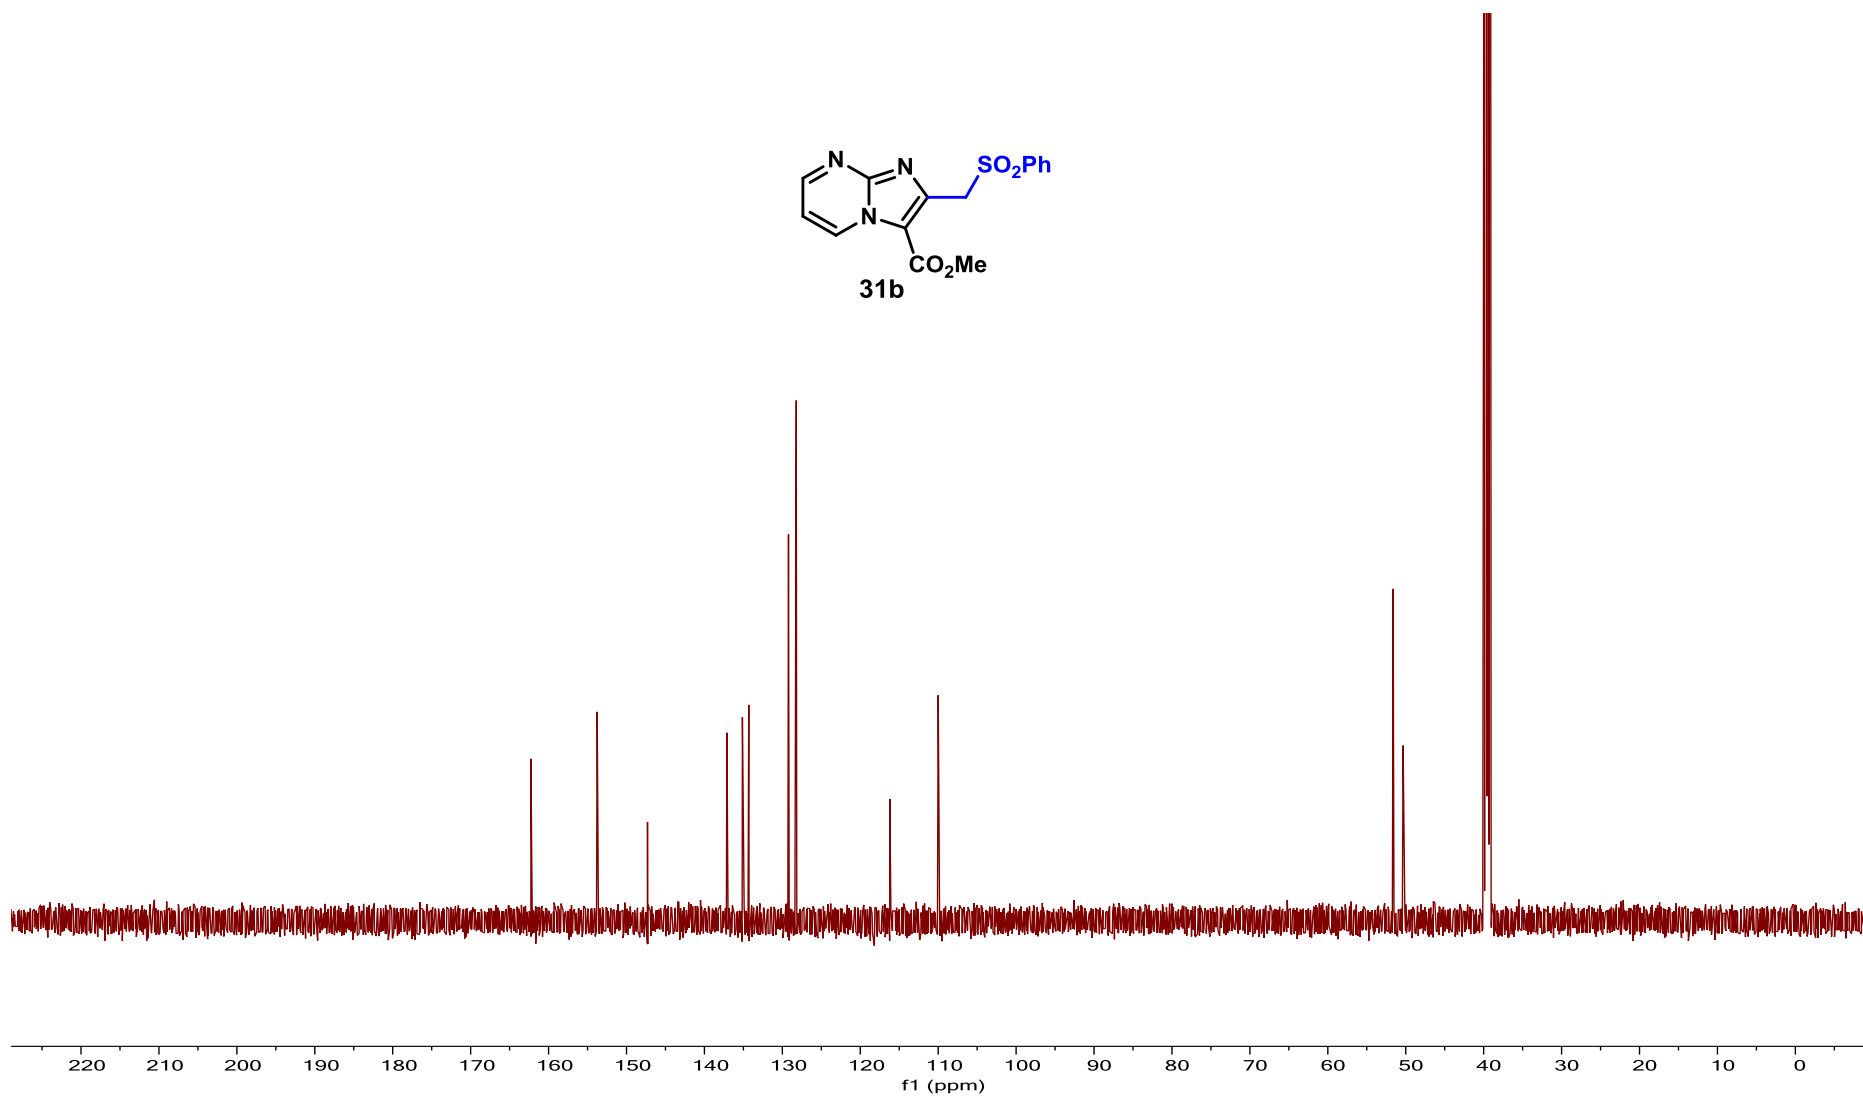

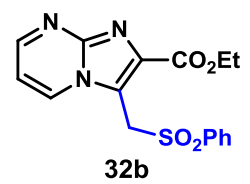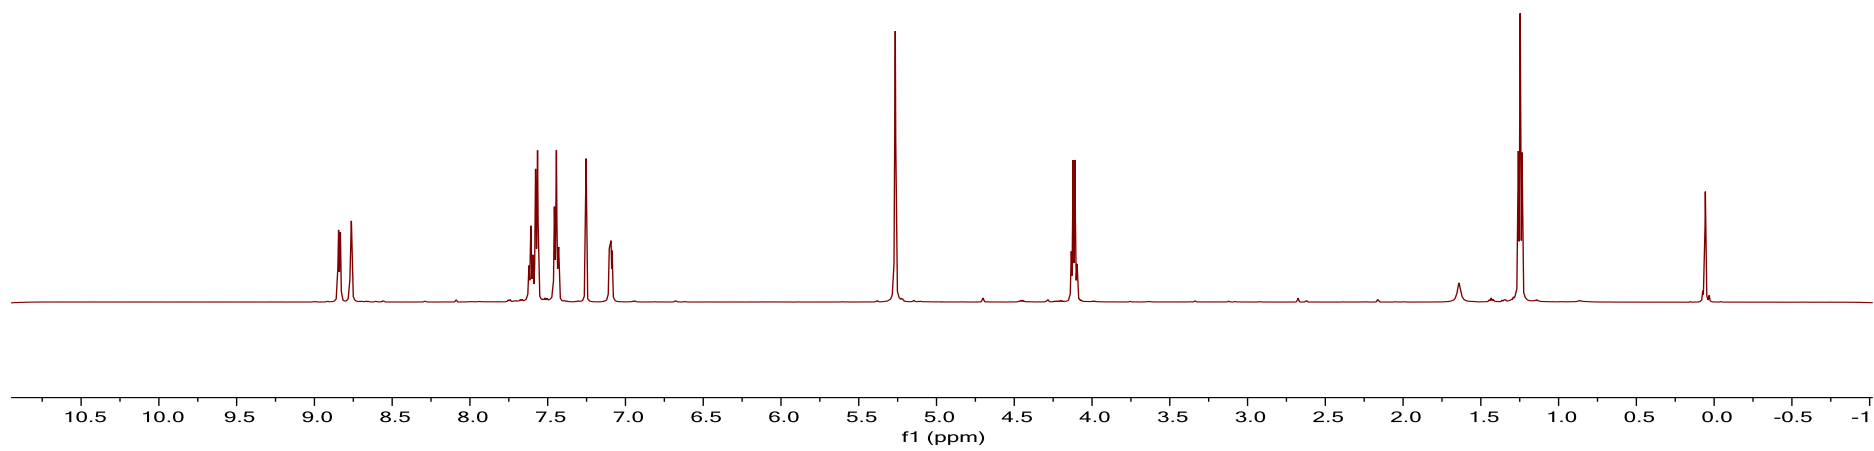

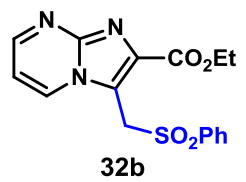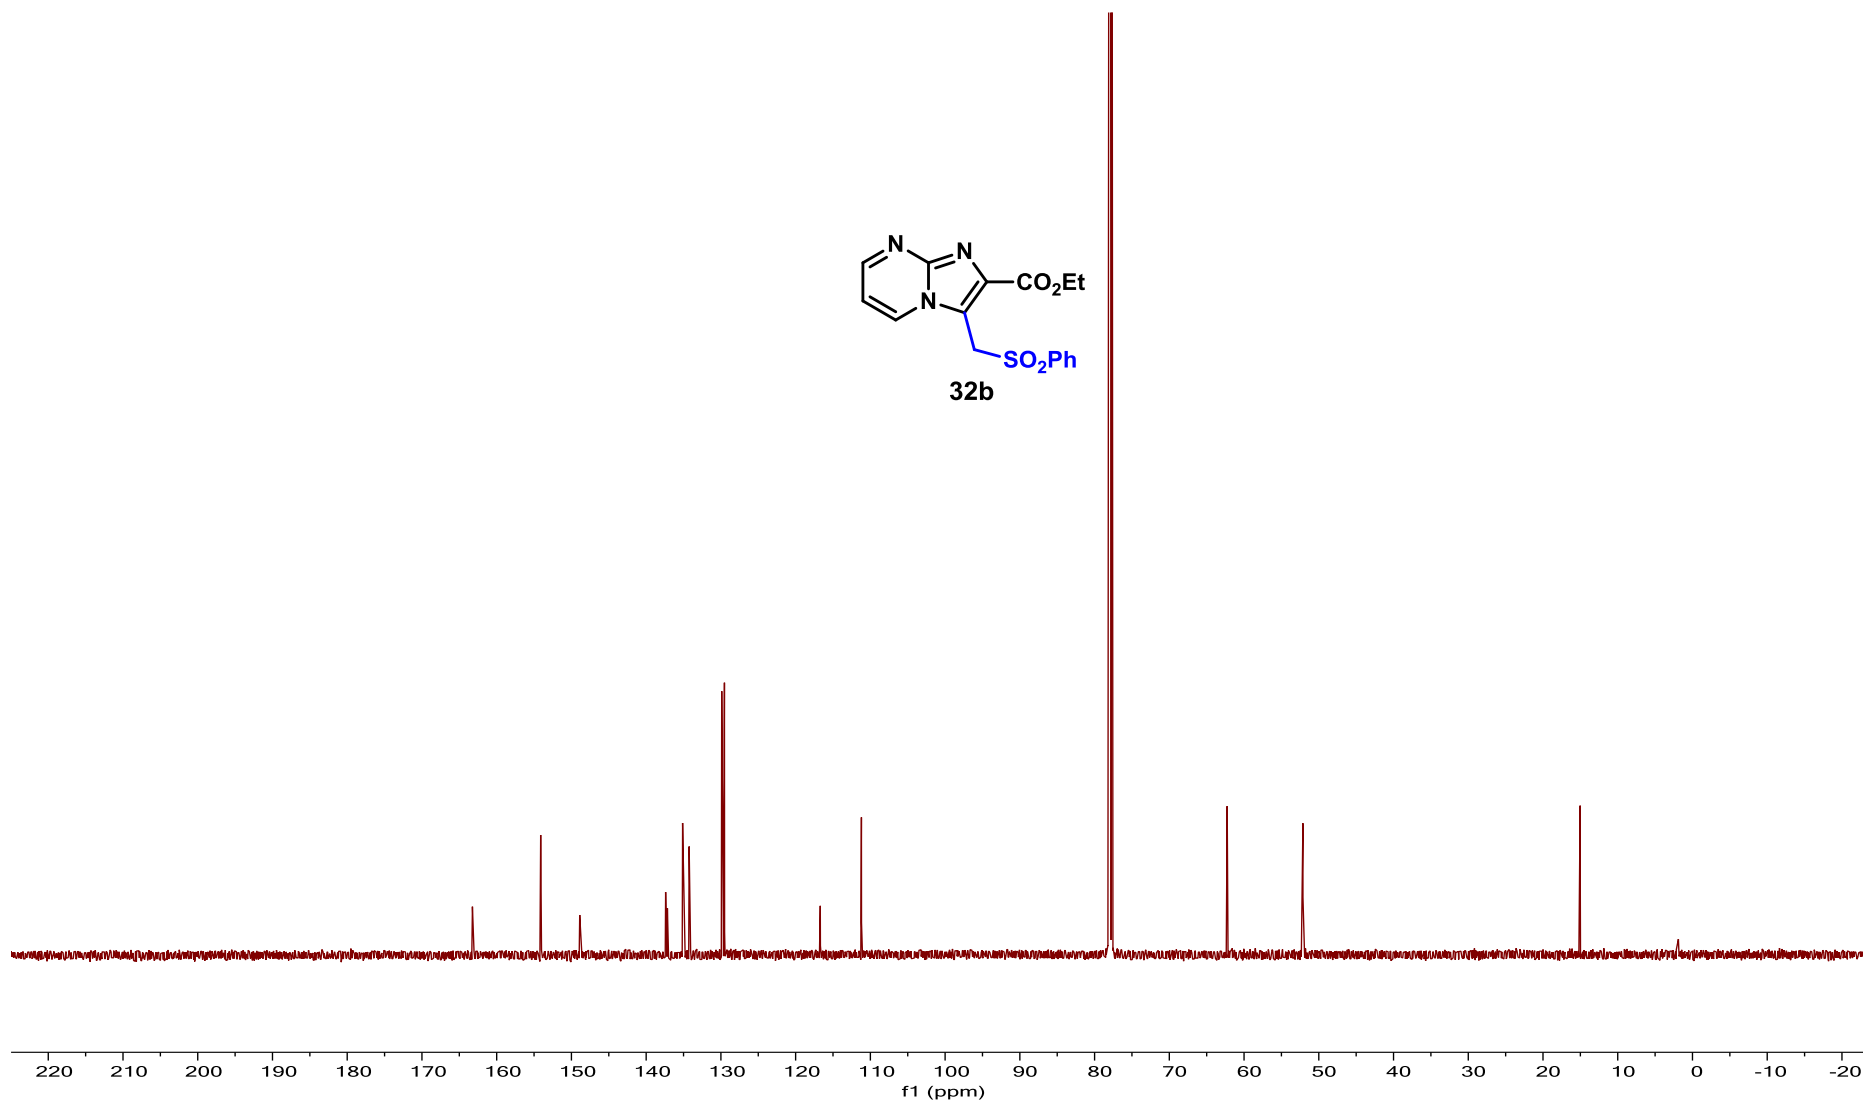

### 3. NMR Spectra of biologically relevant products L-33b to 36b

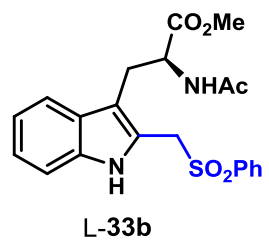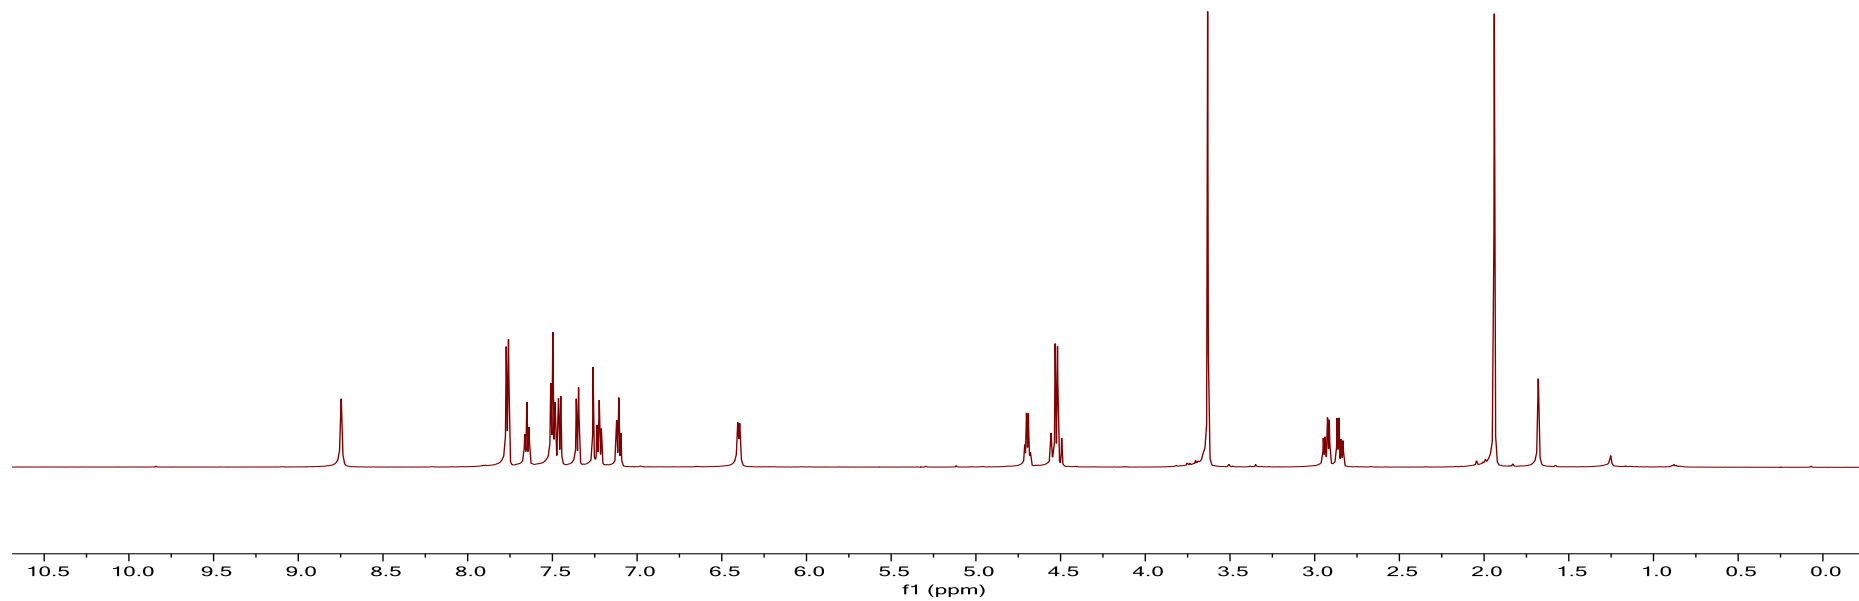

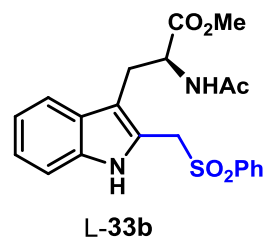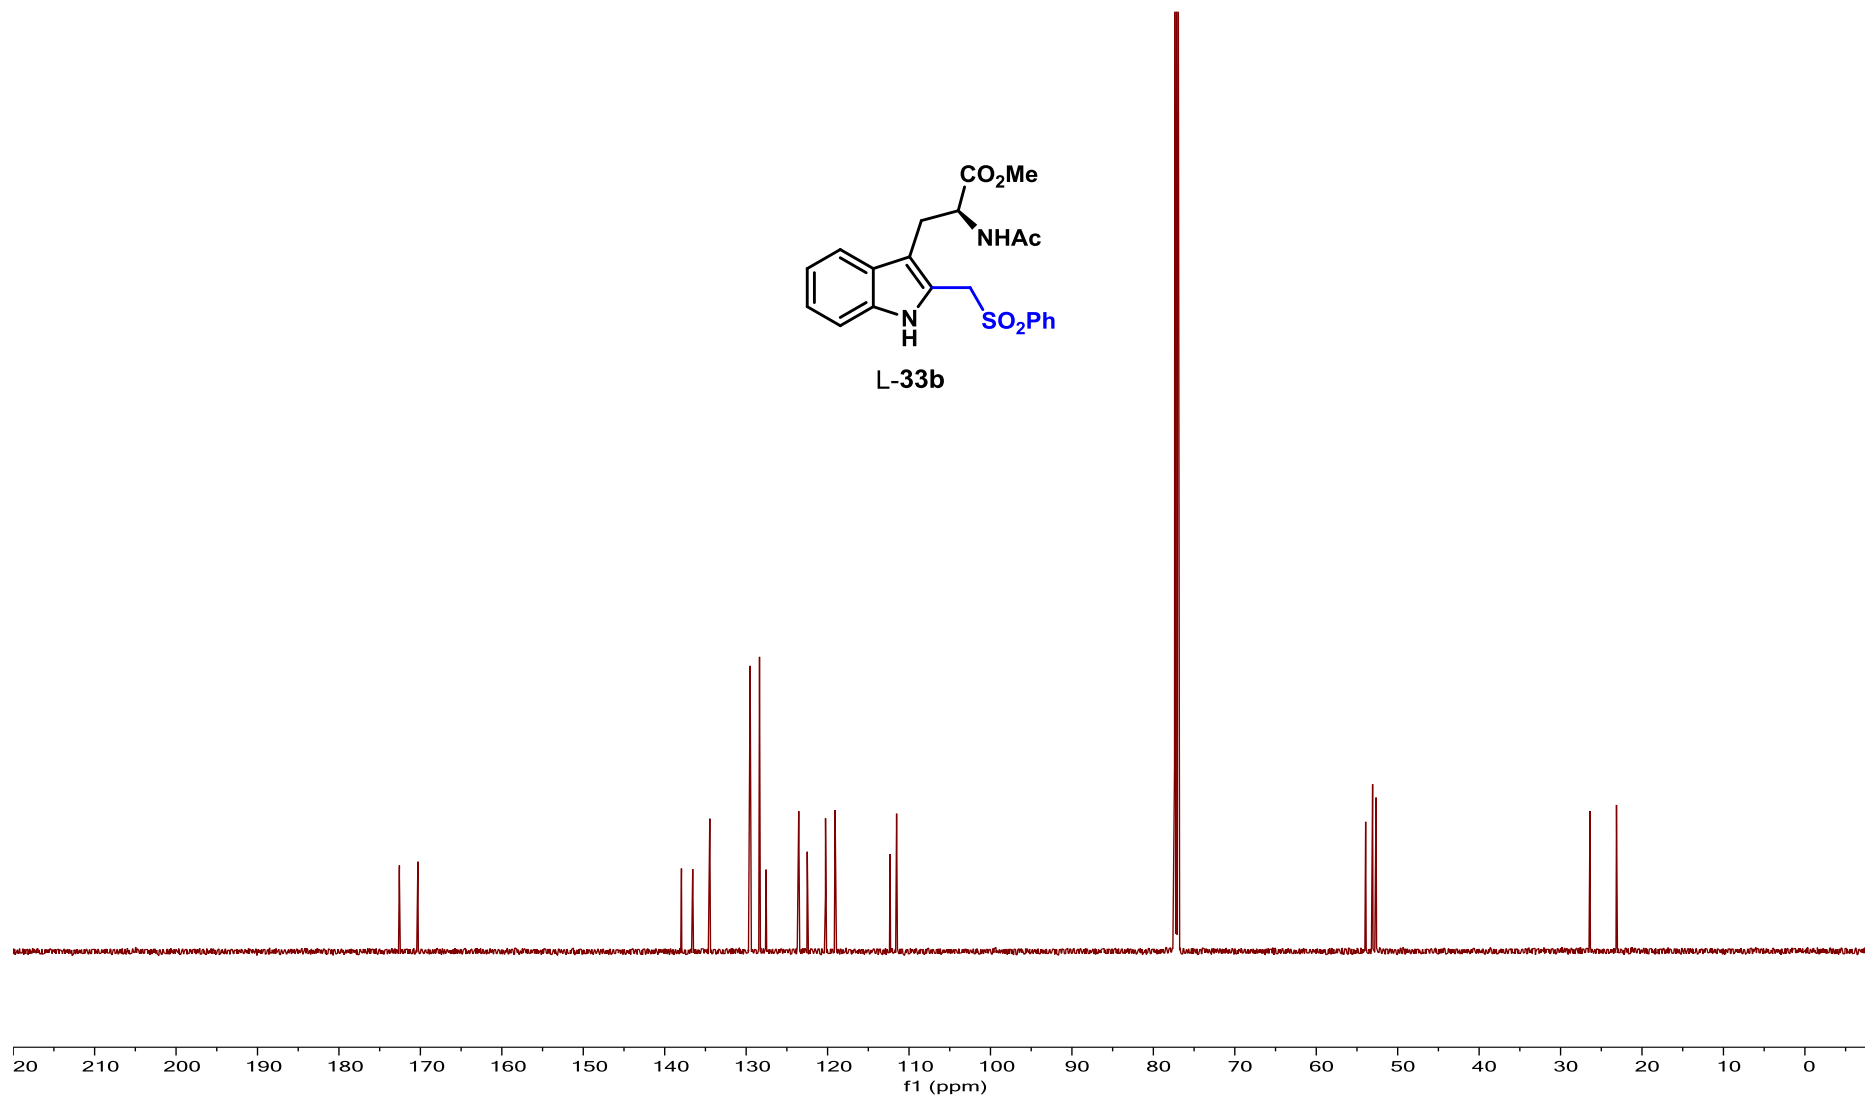

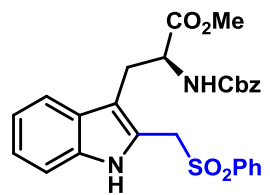

L-34b

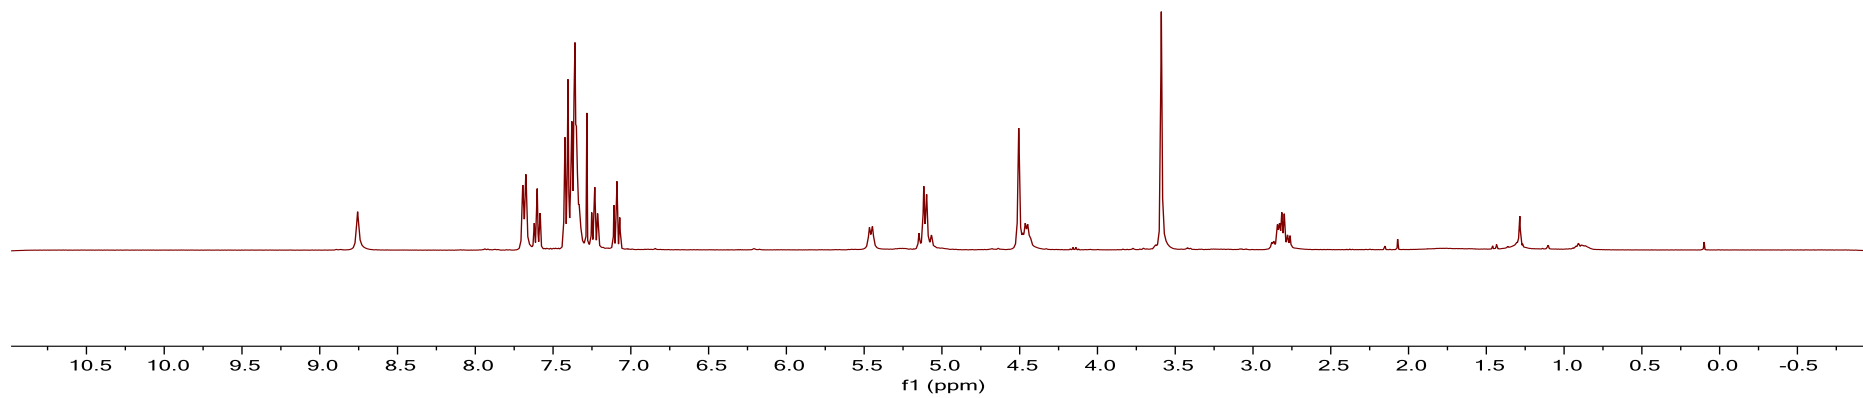

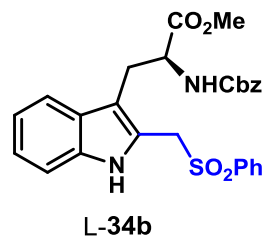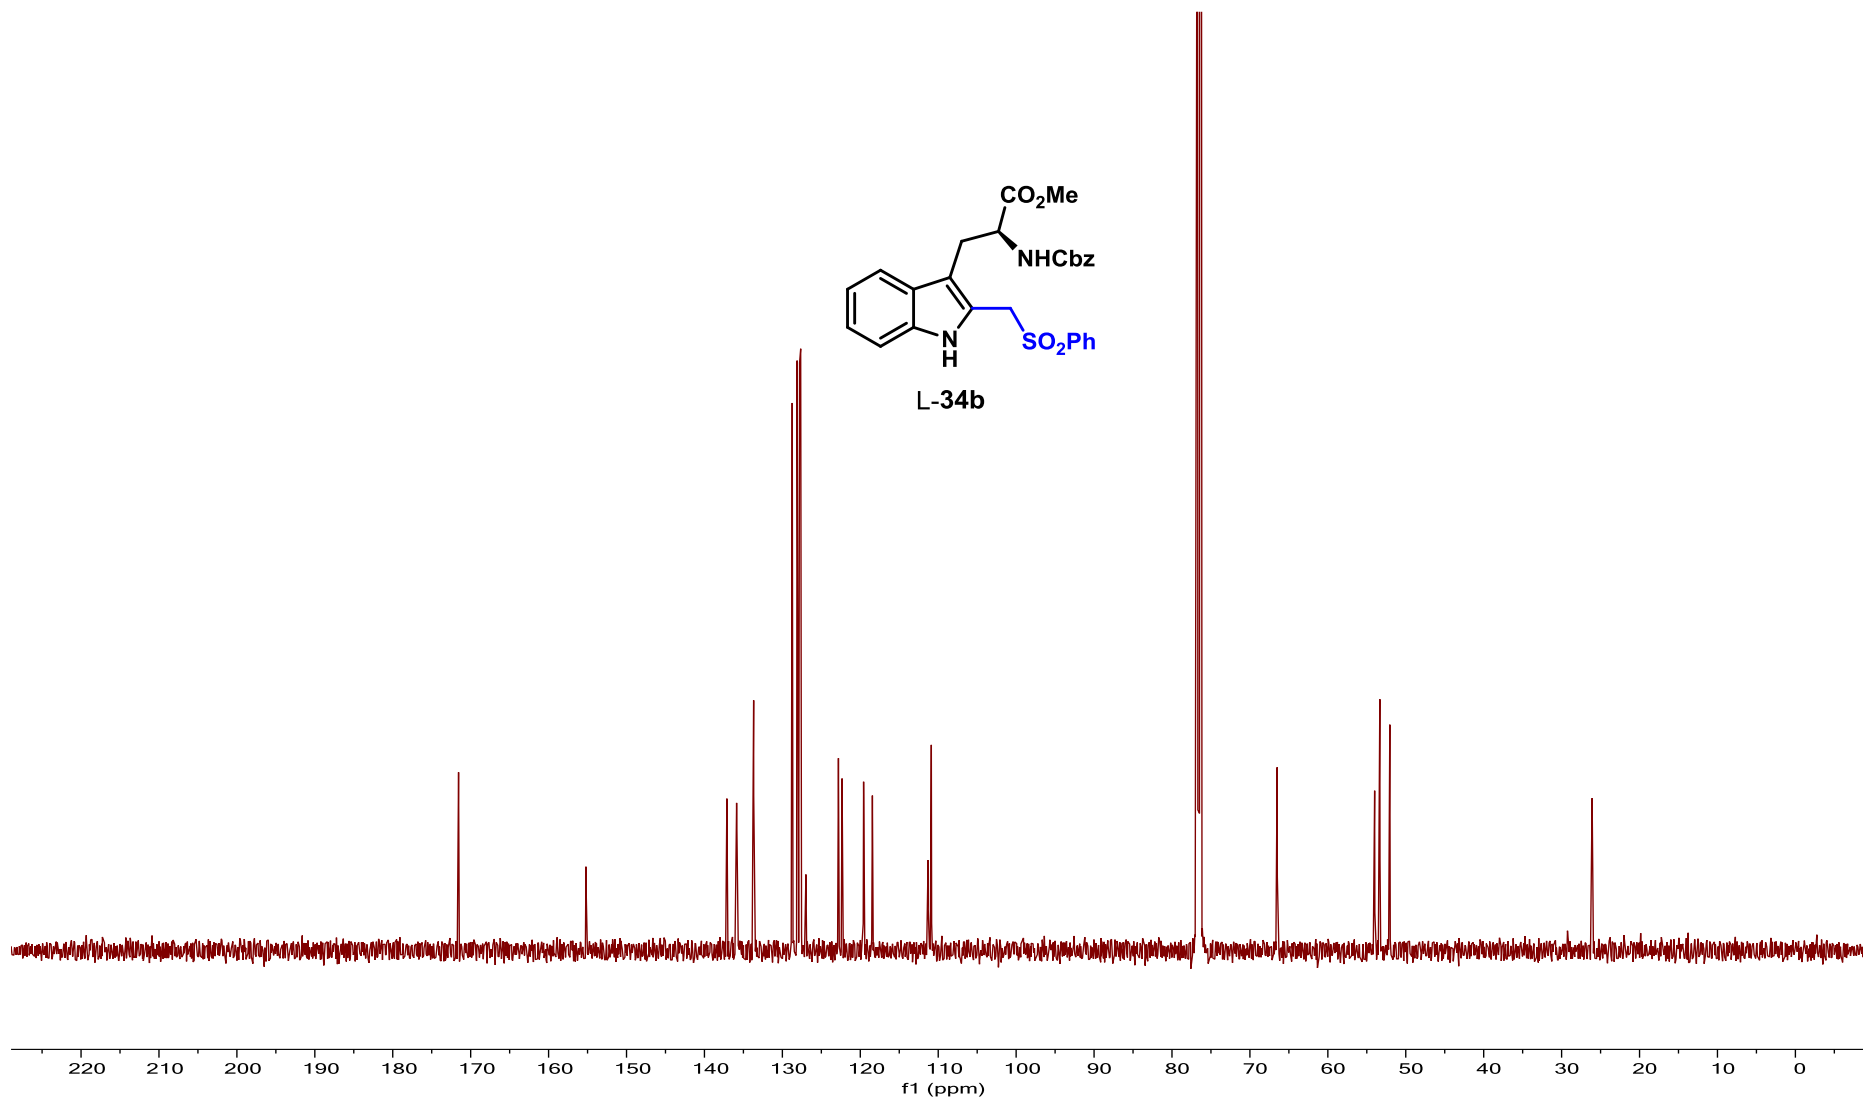



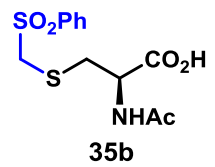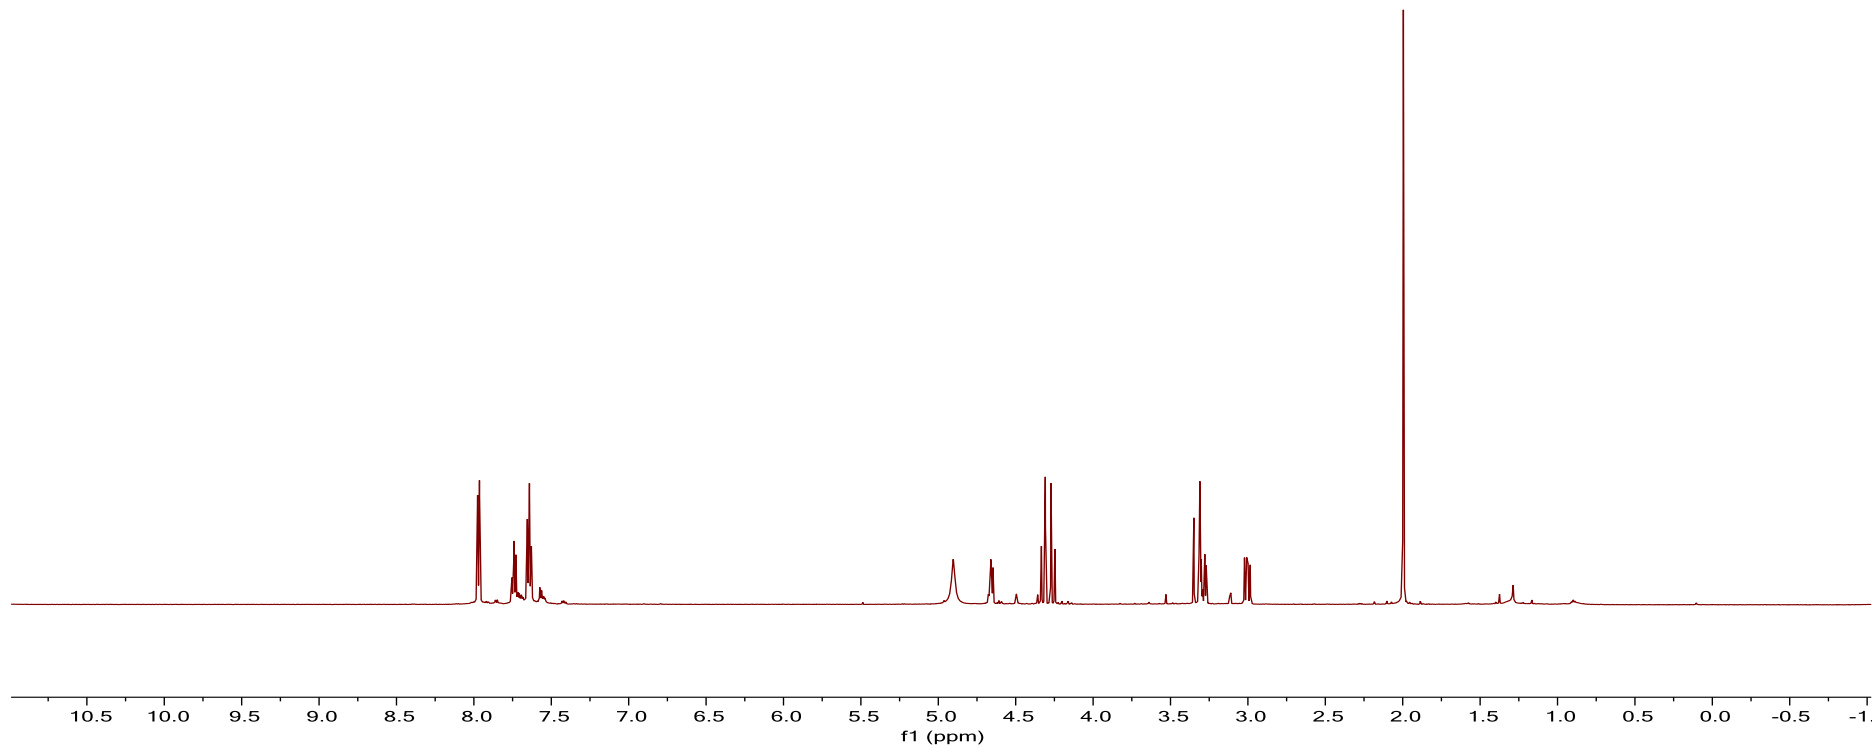

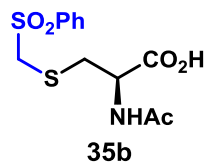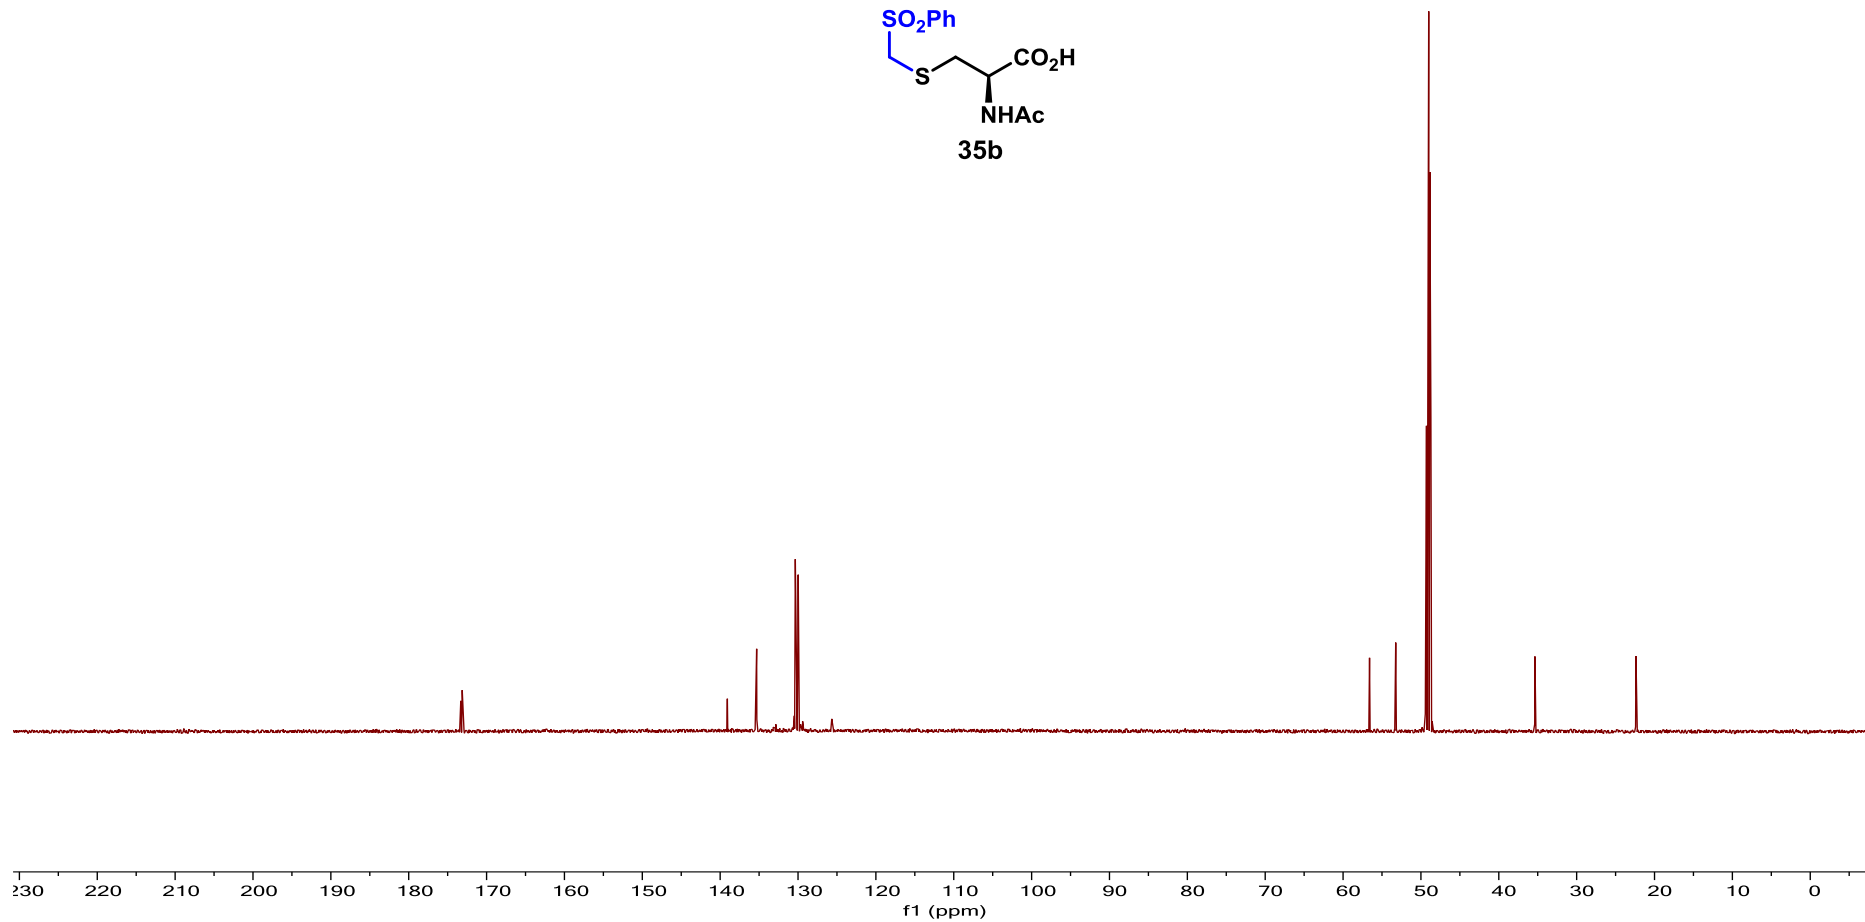

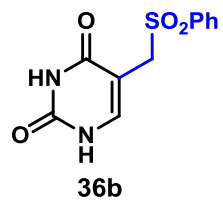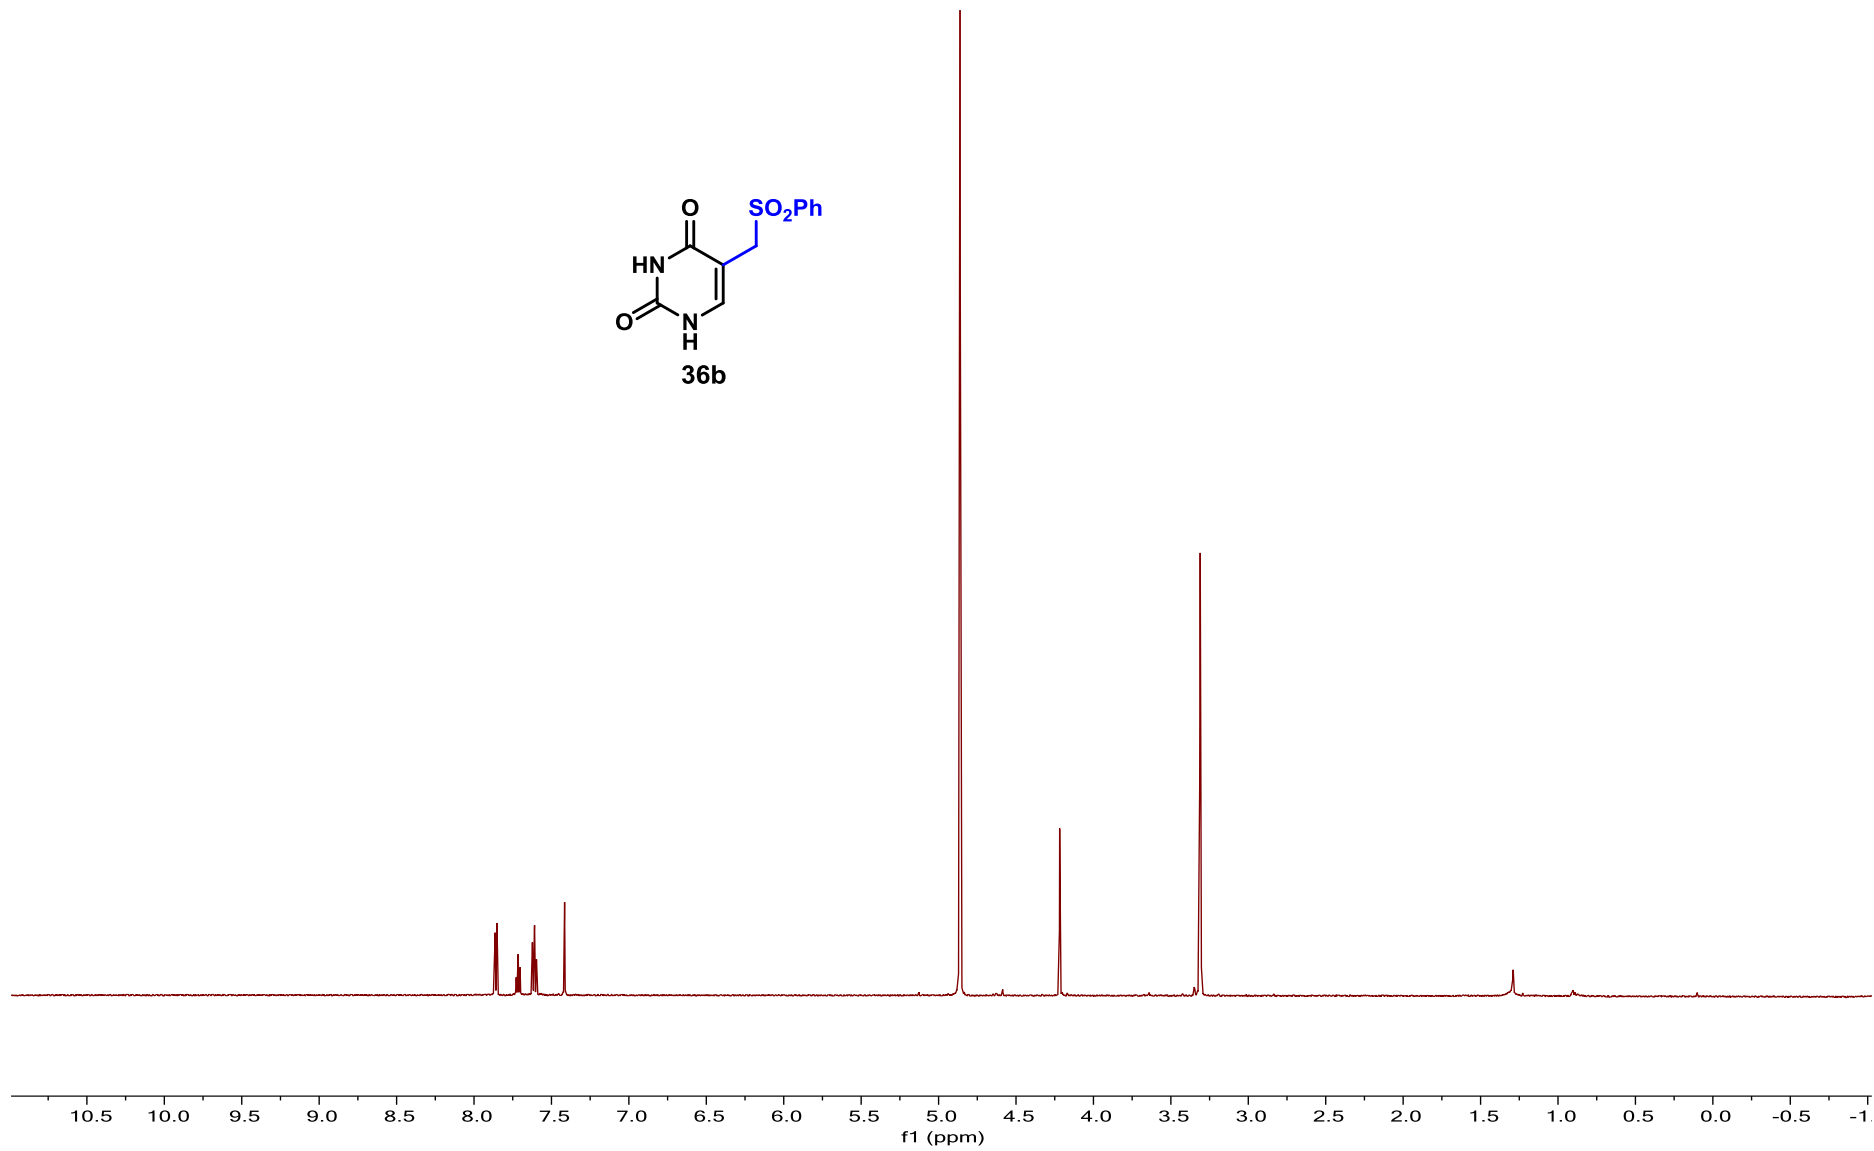

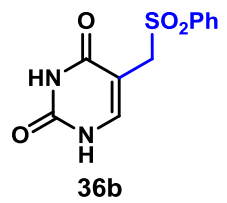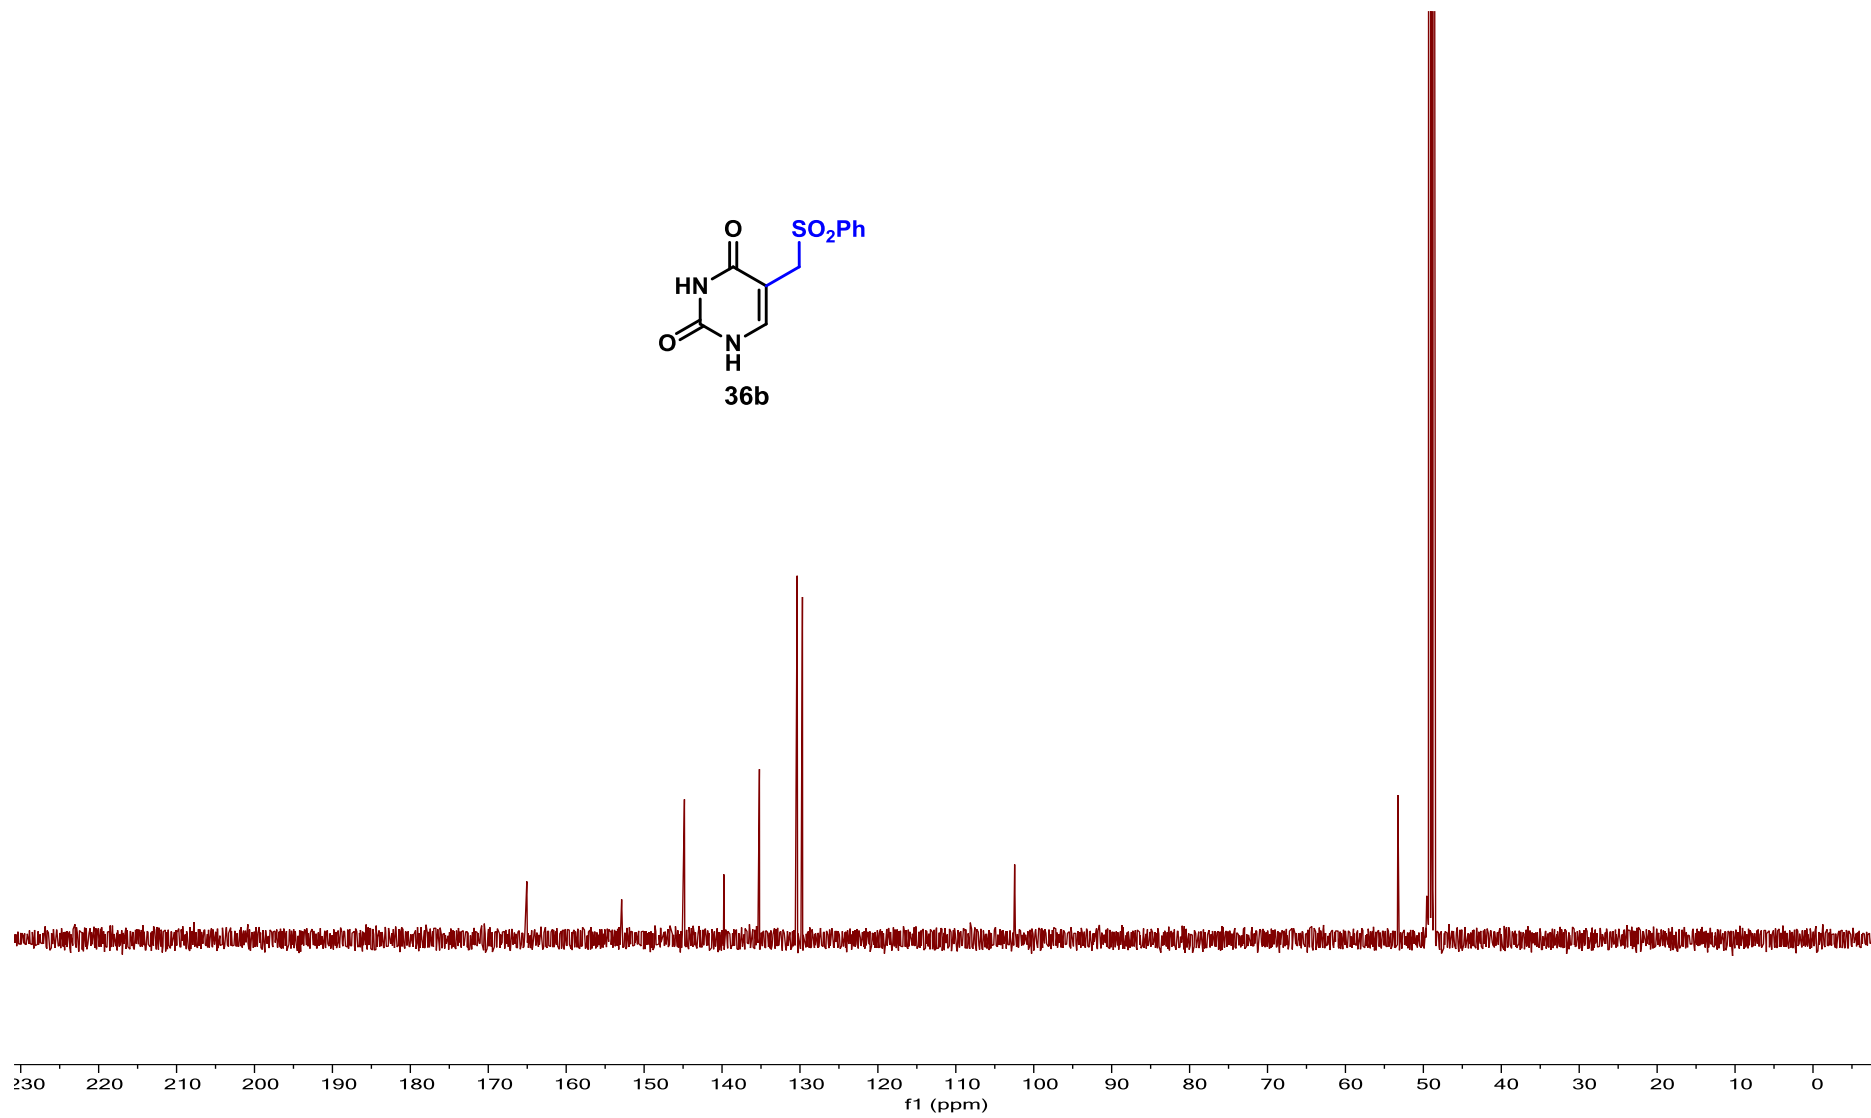

#### 4. NMR Spectra of desulfonylation products 7c to 29c

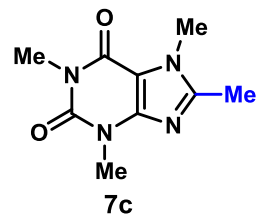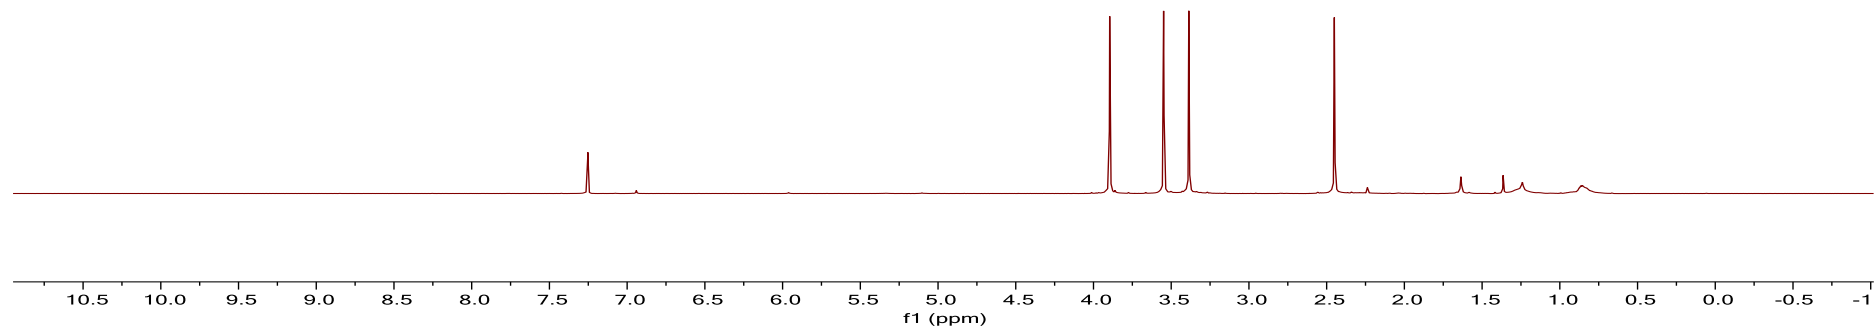

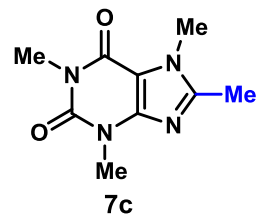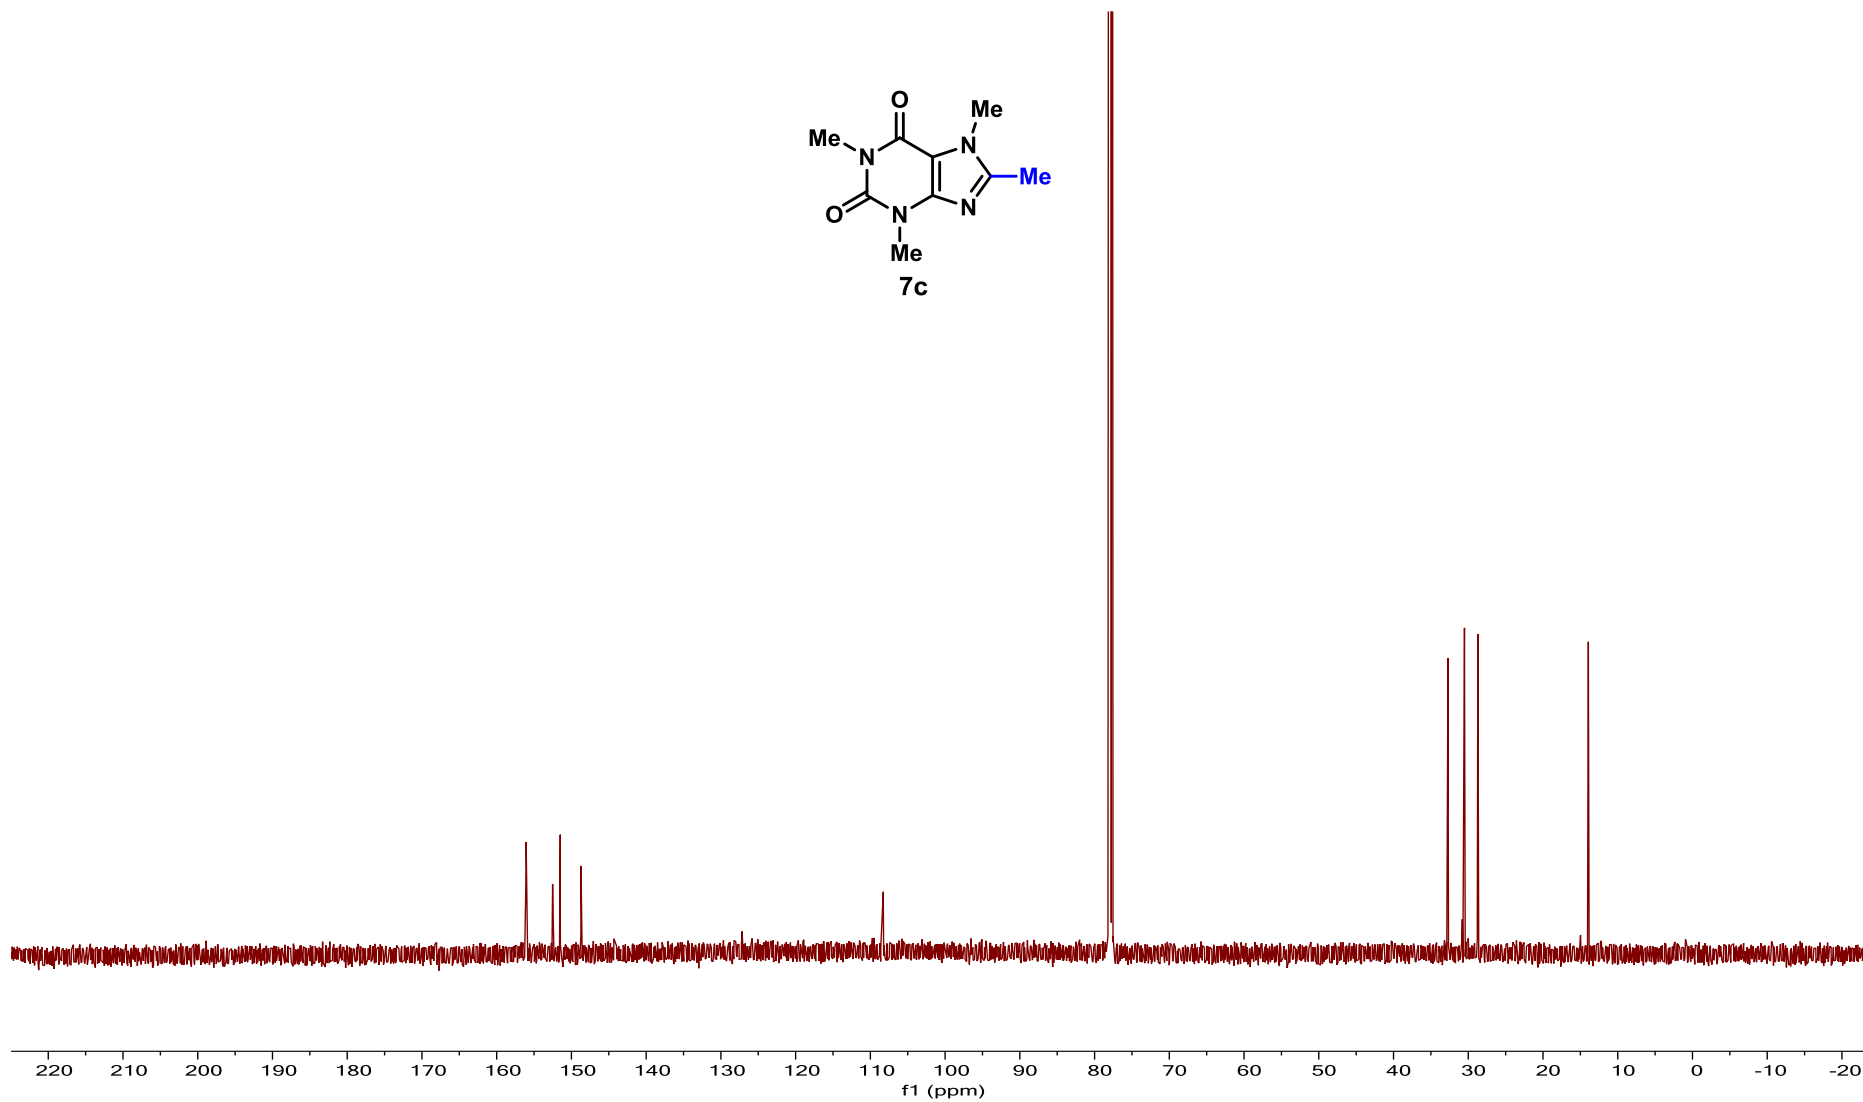

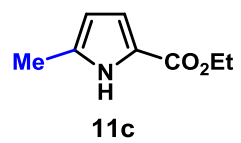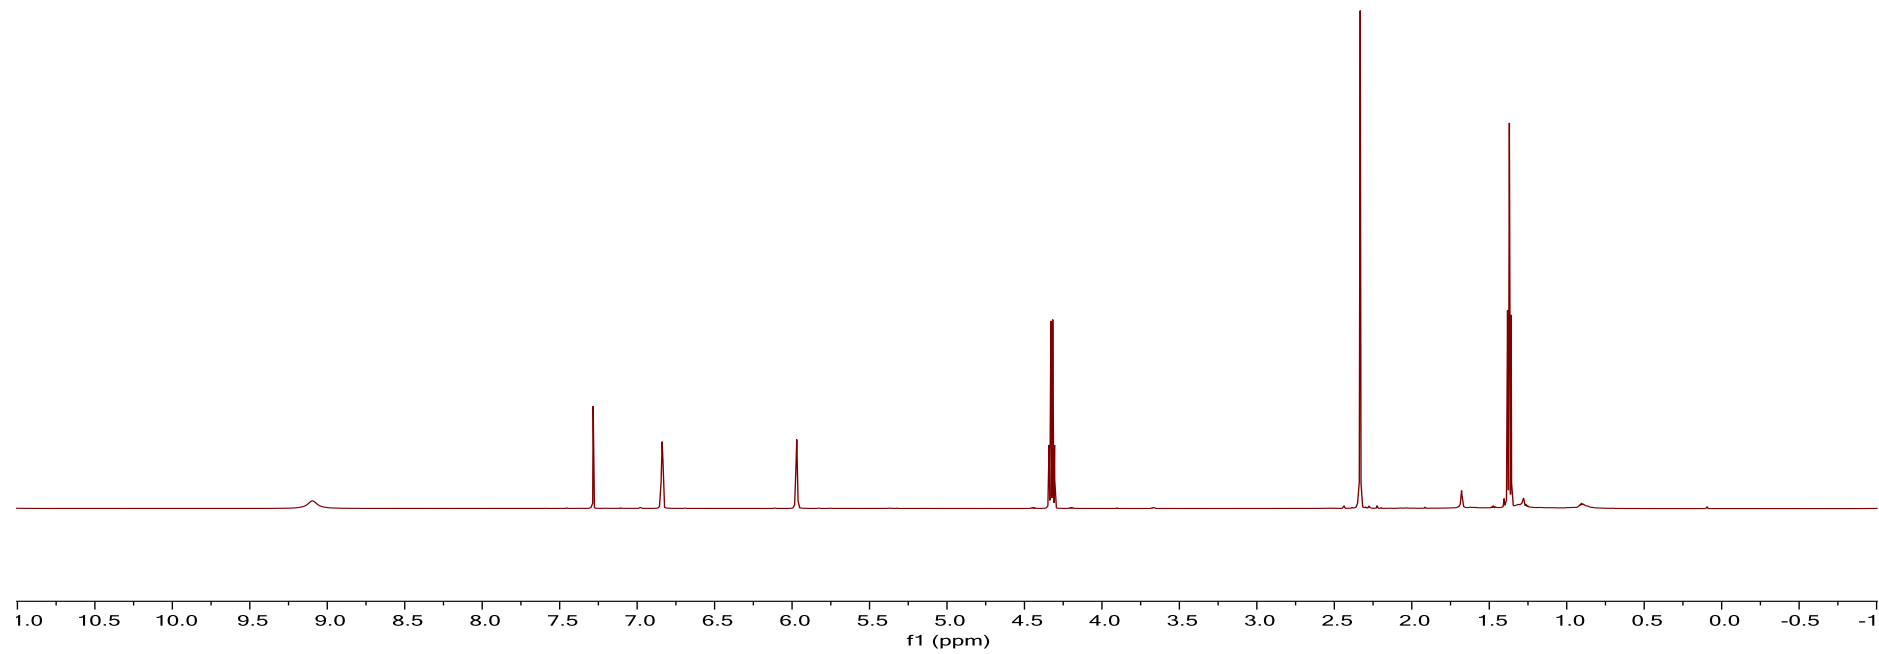

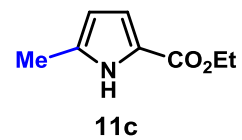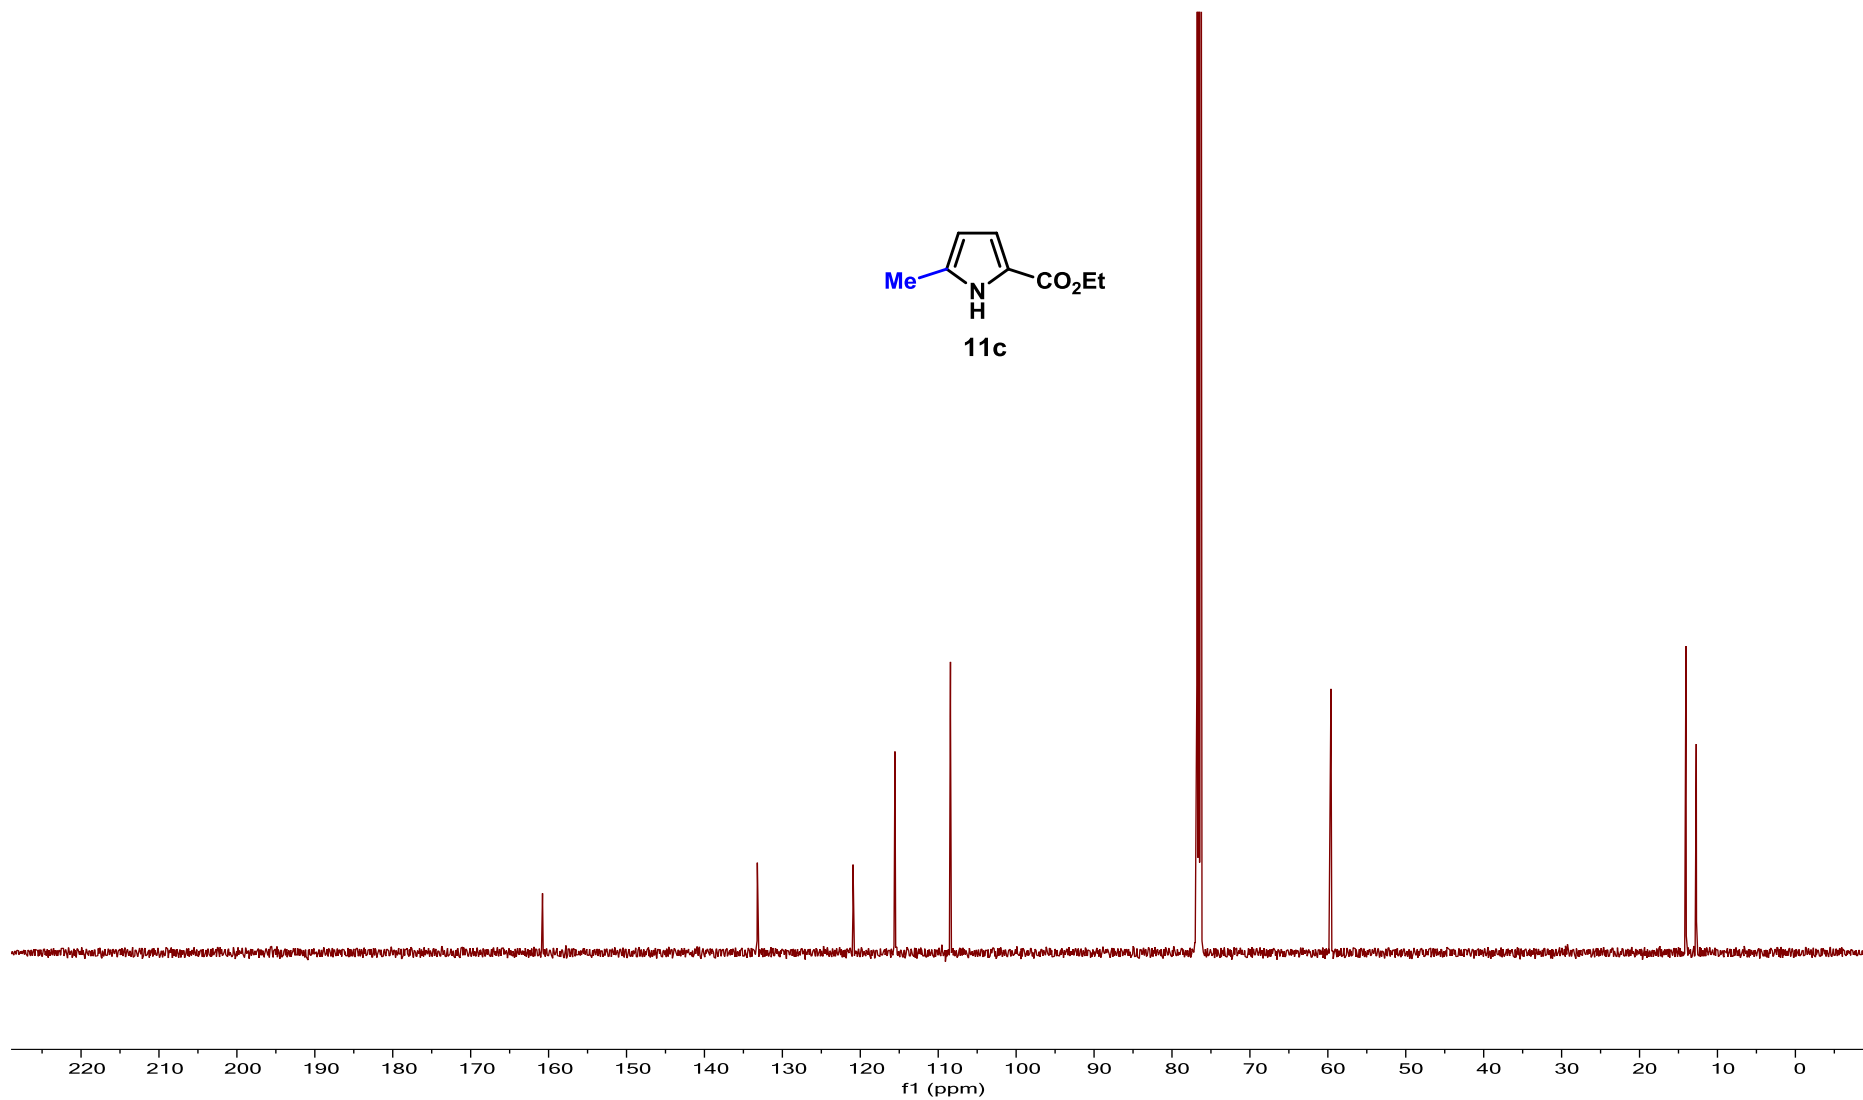



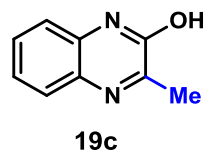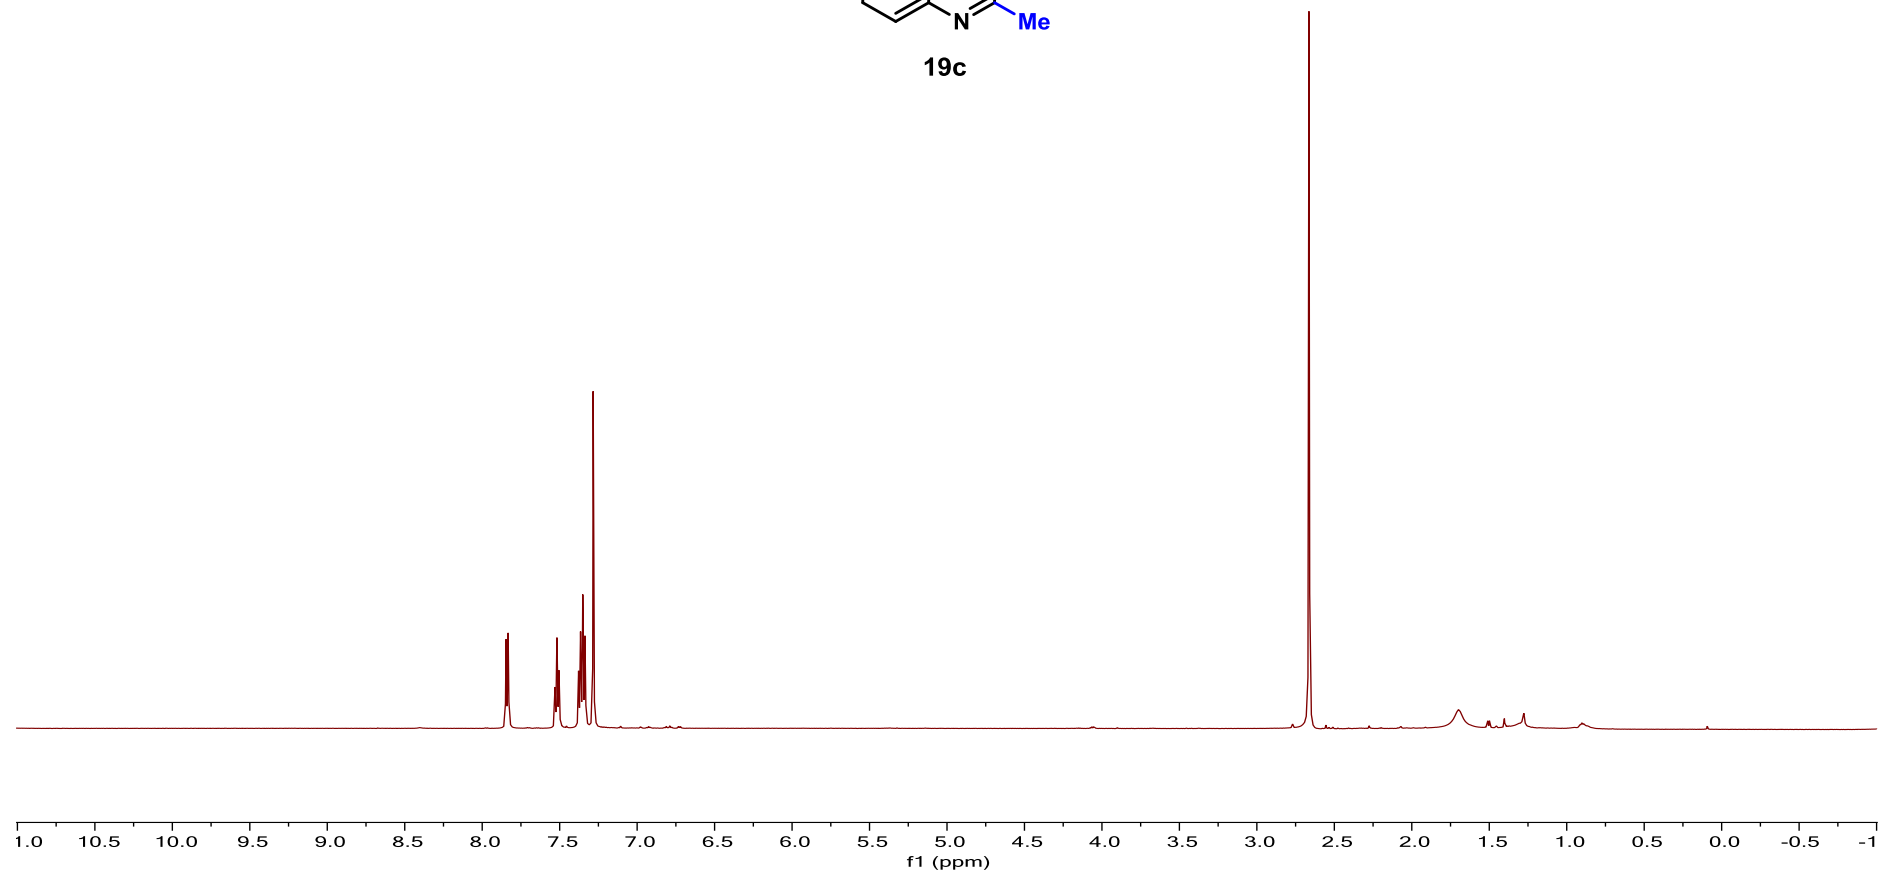

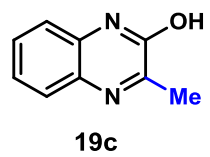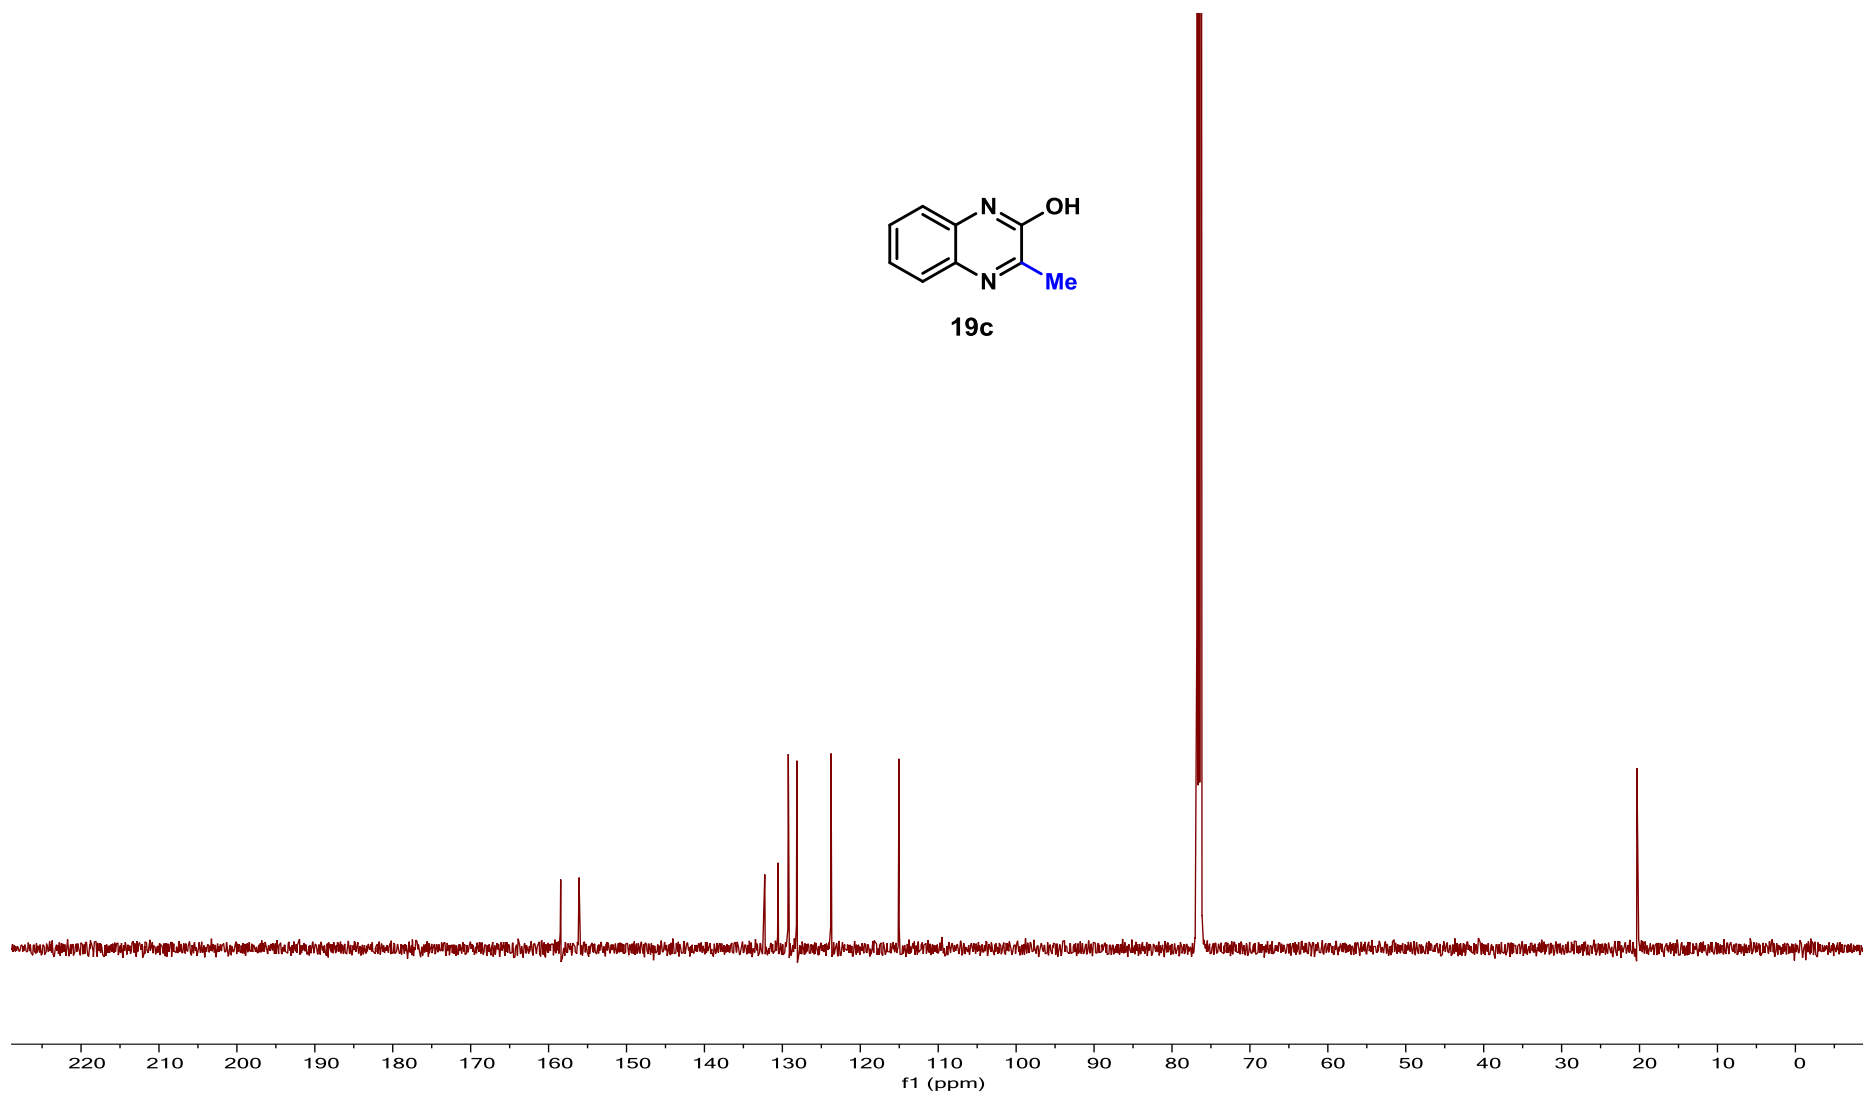

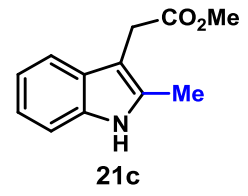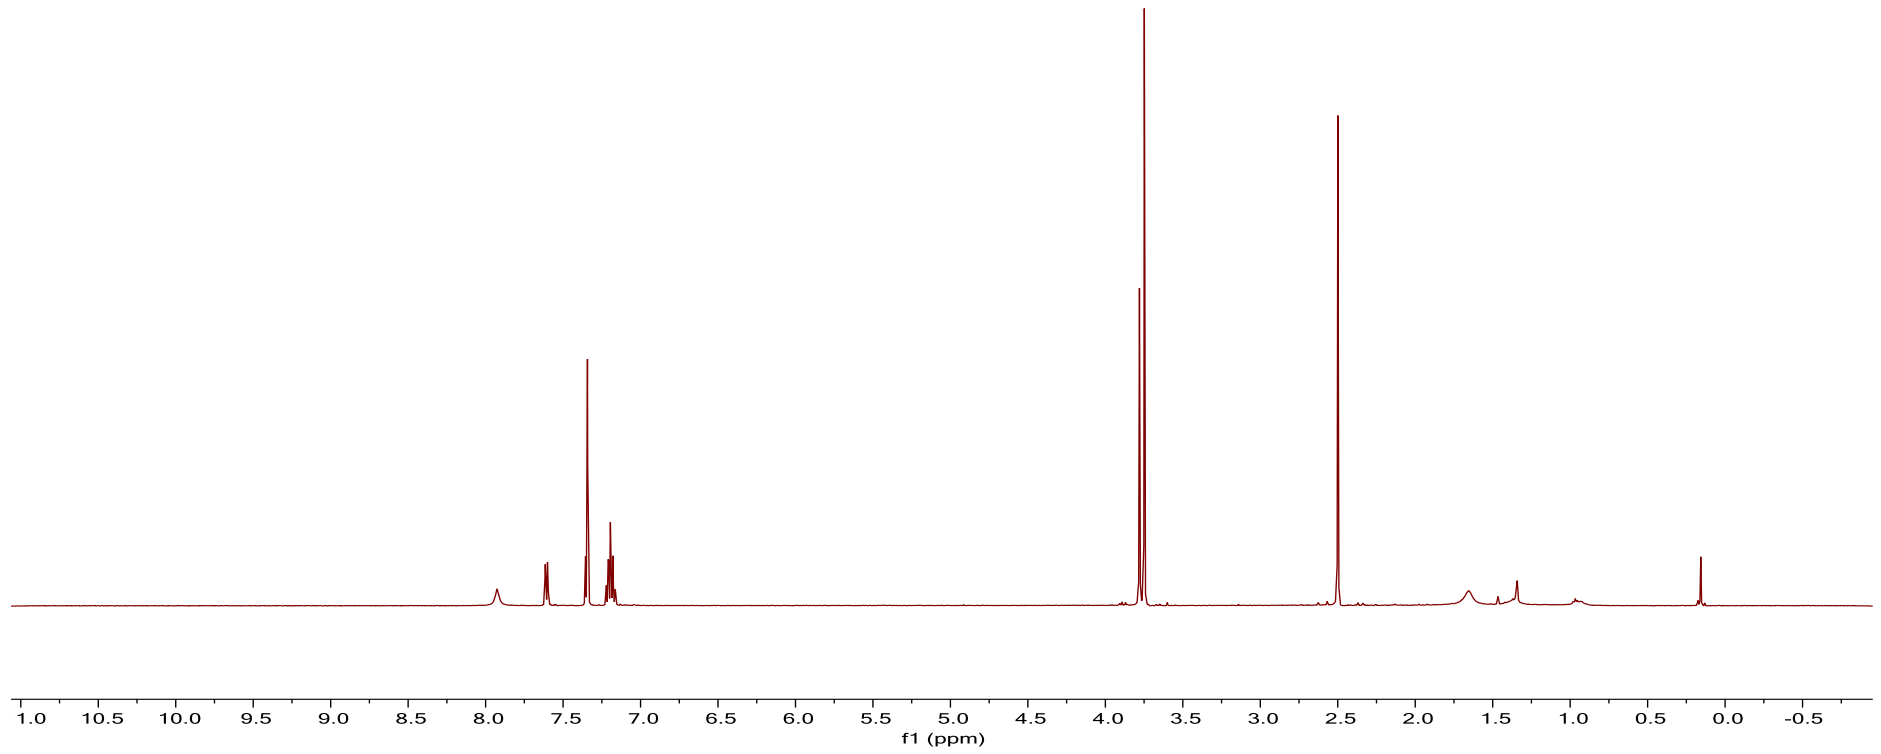

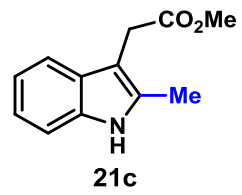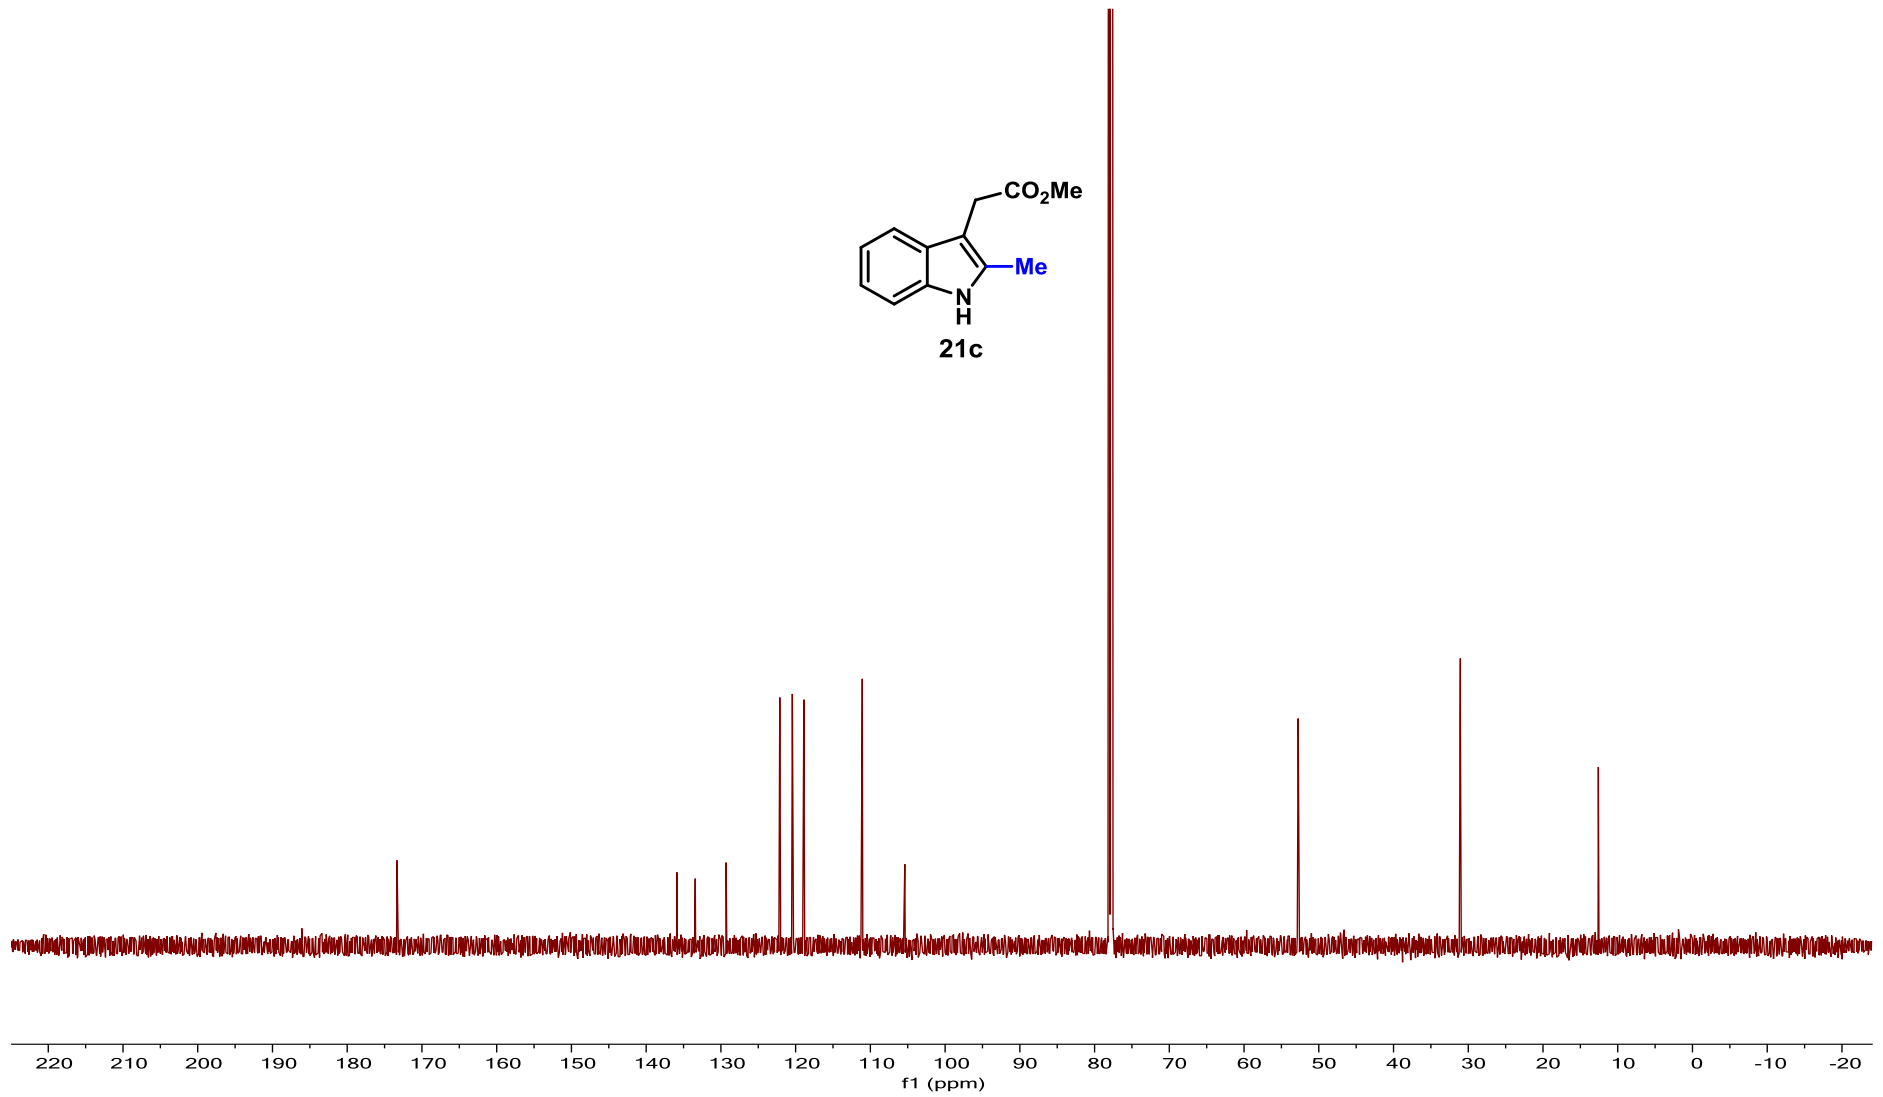

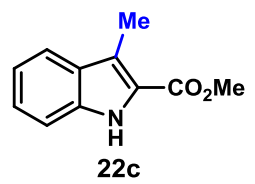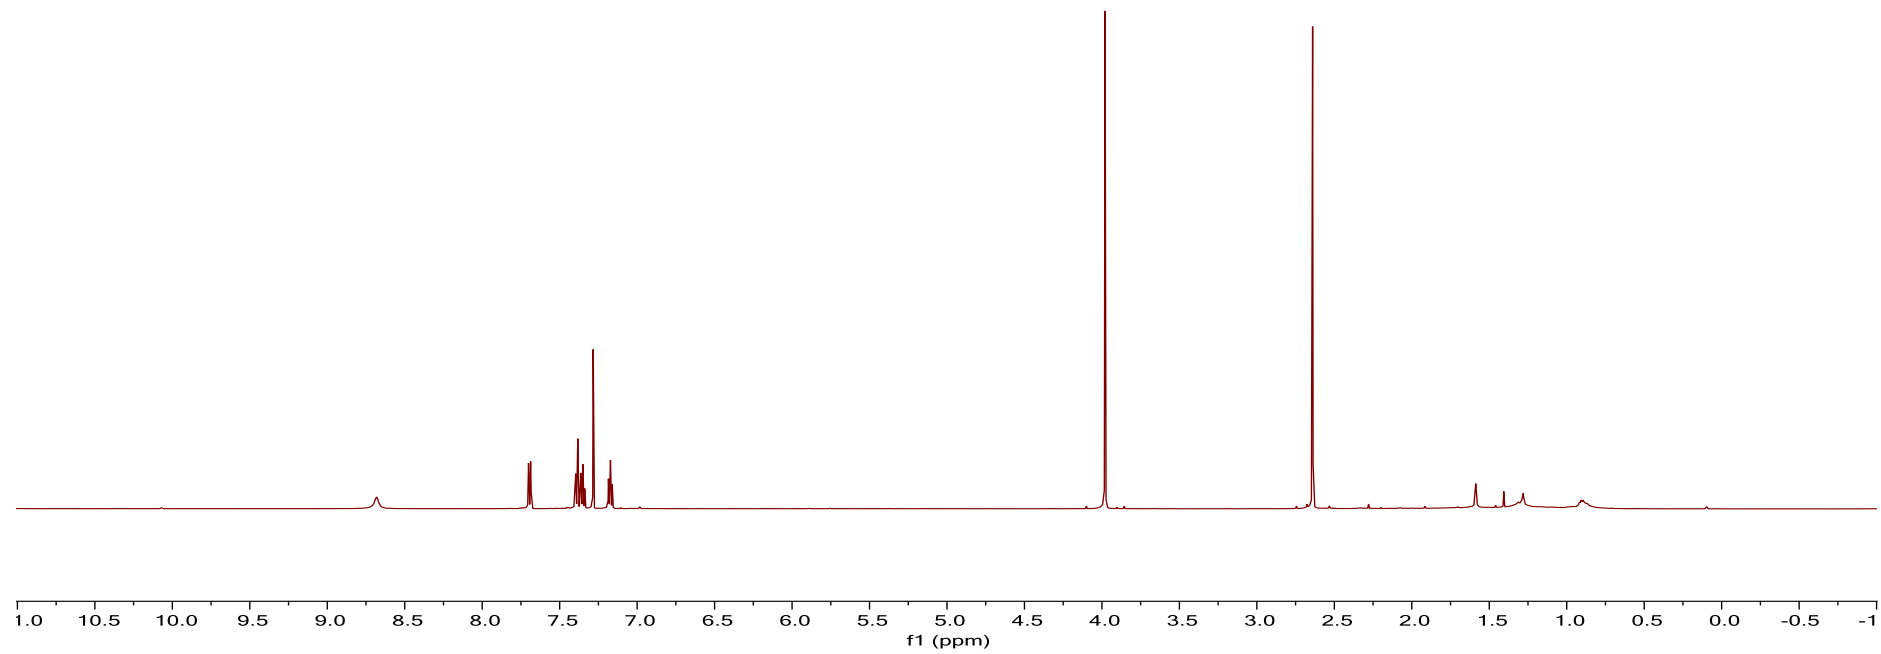

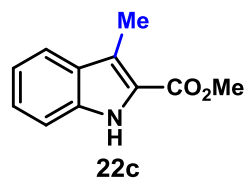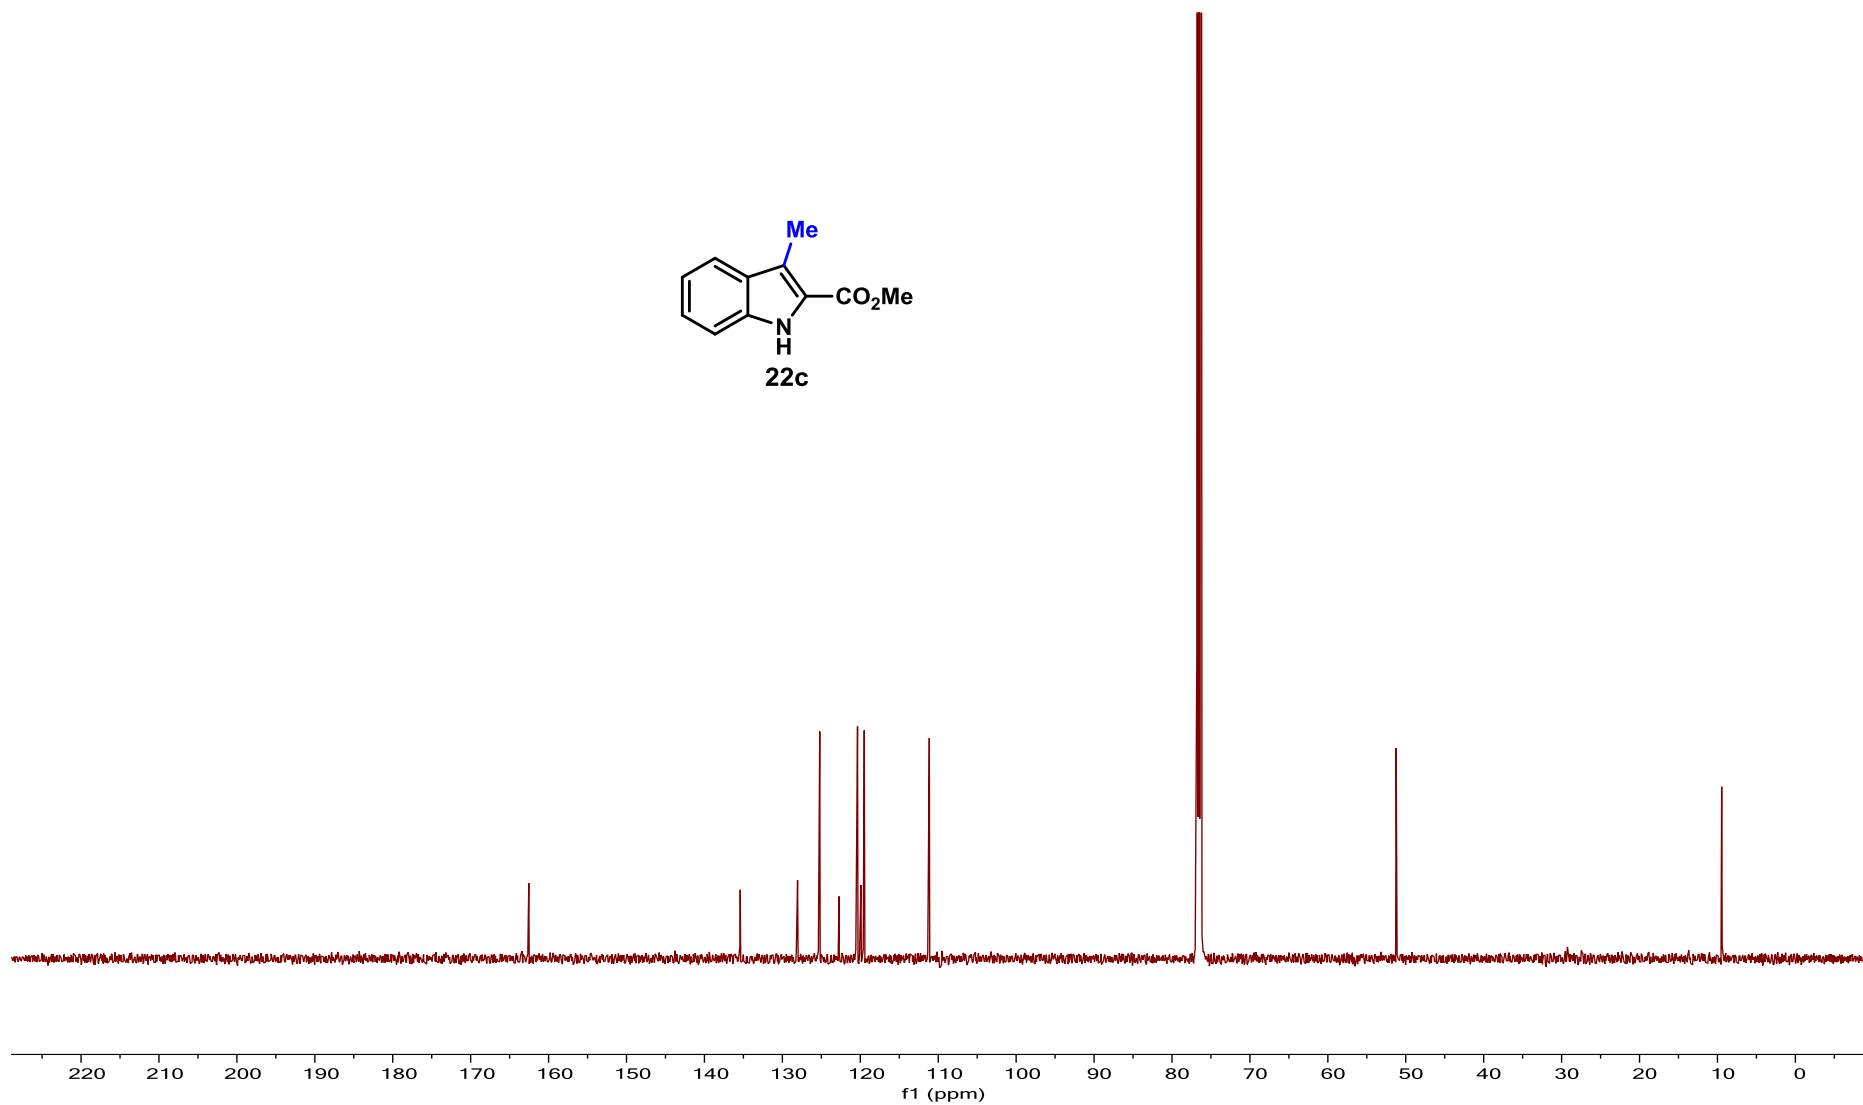

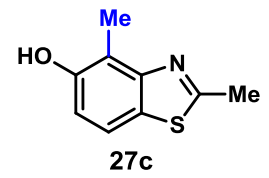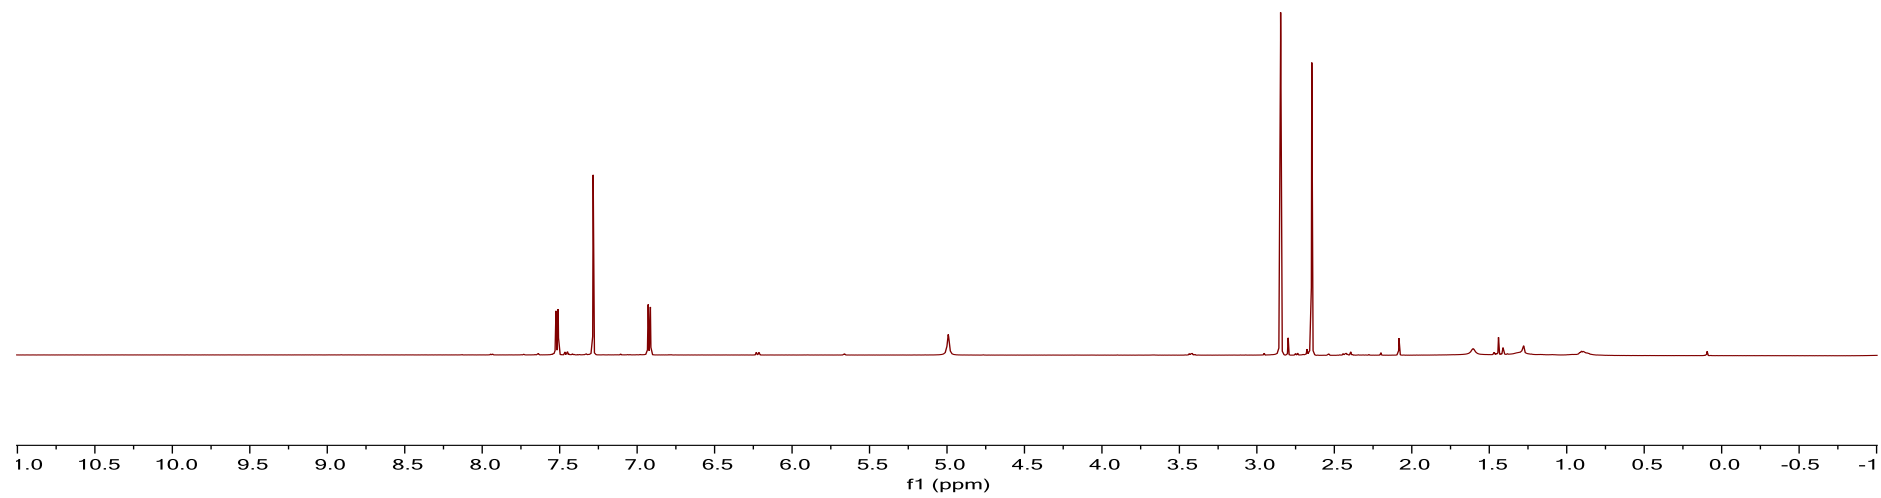

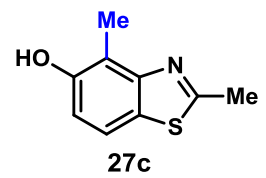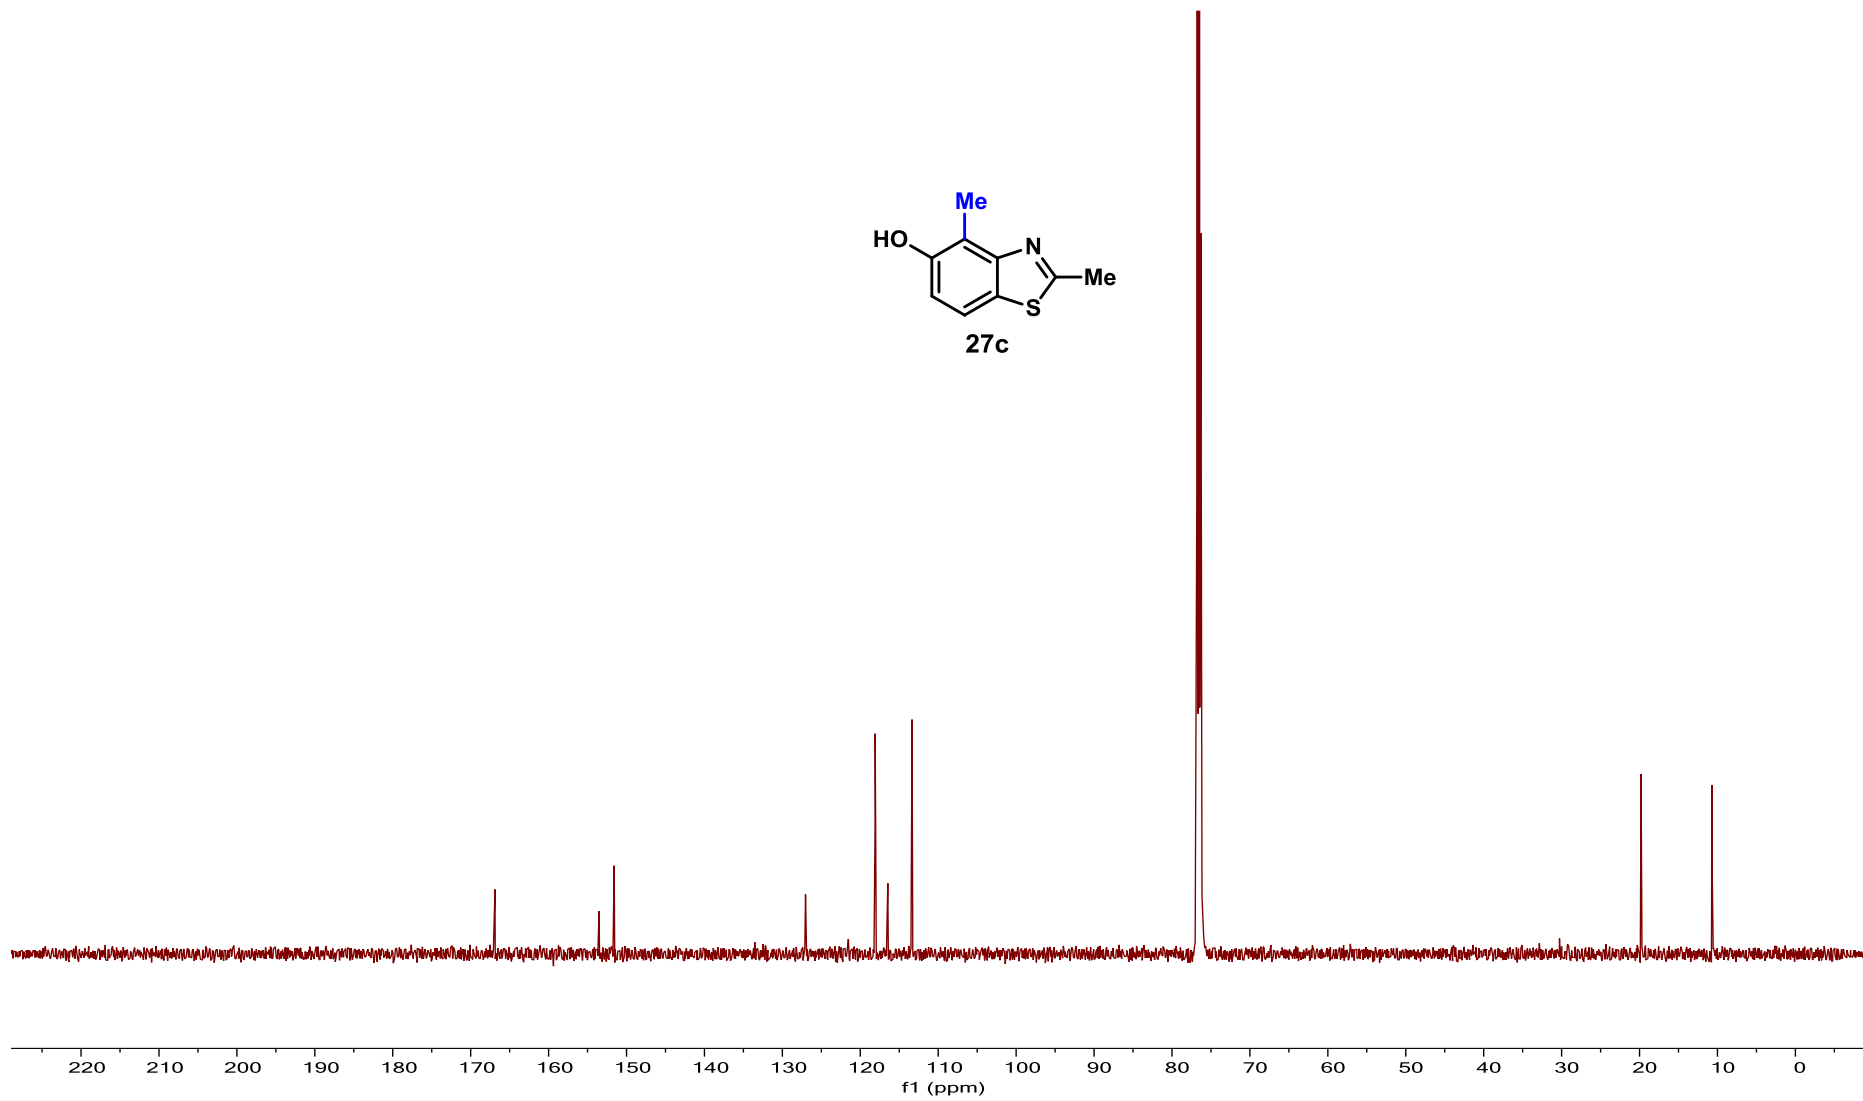



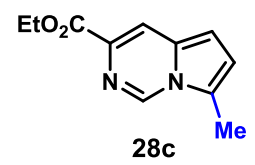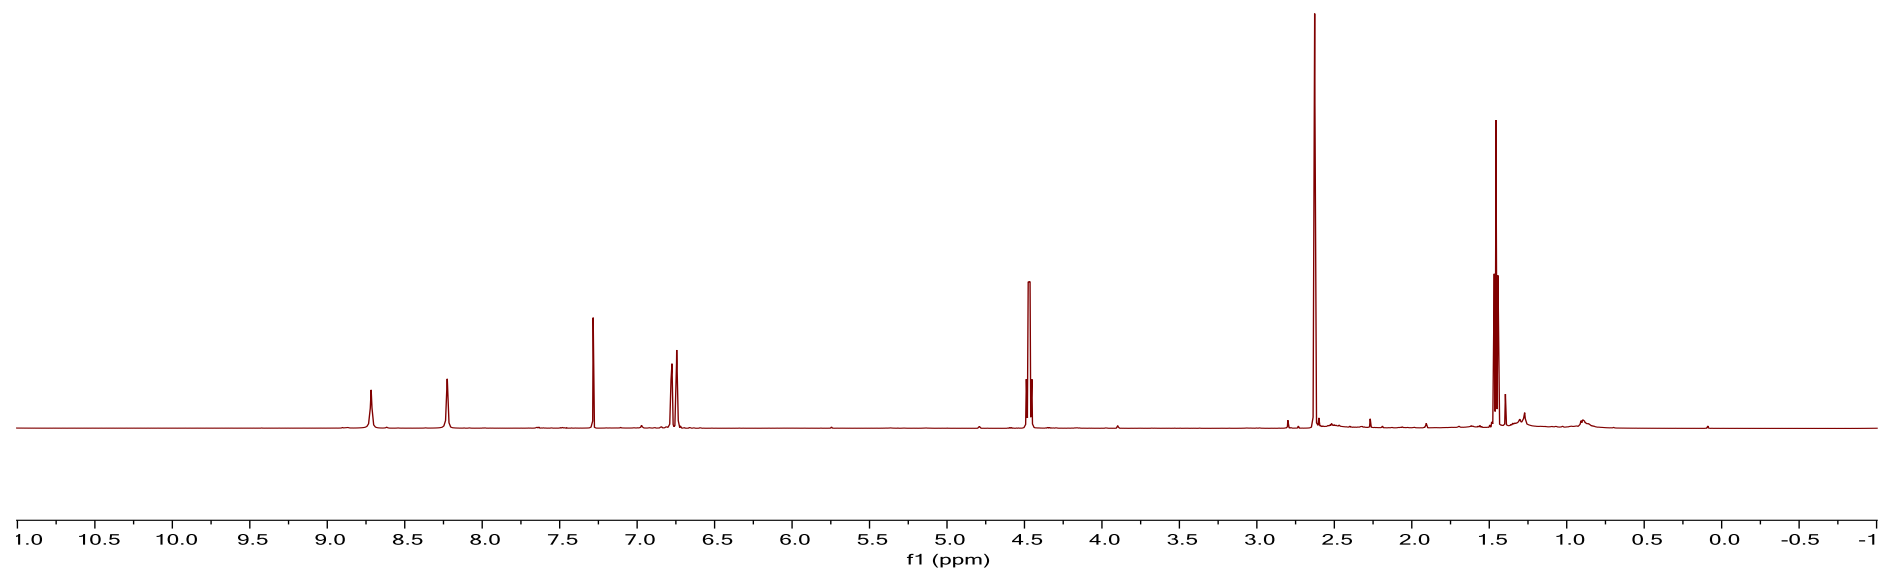

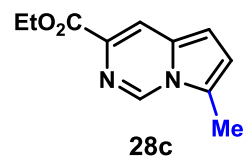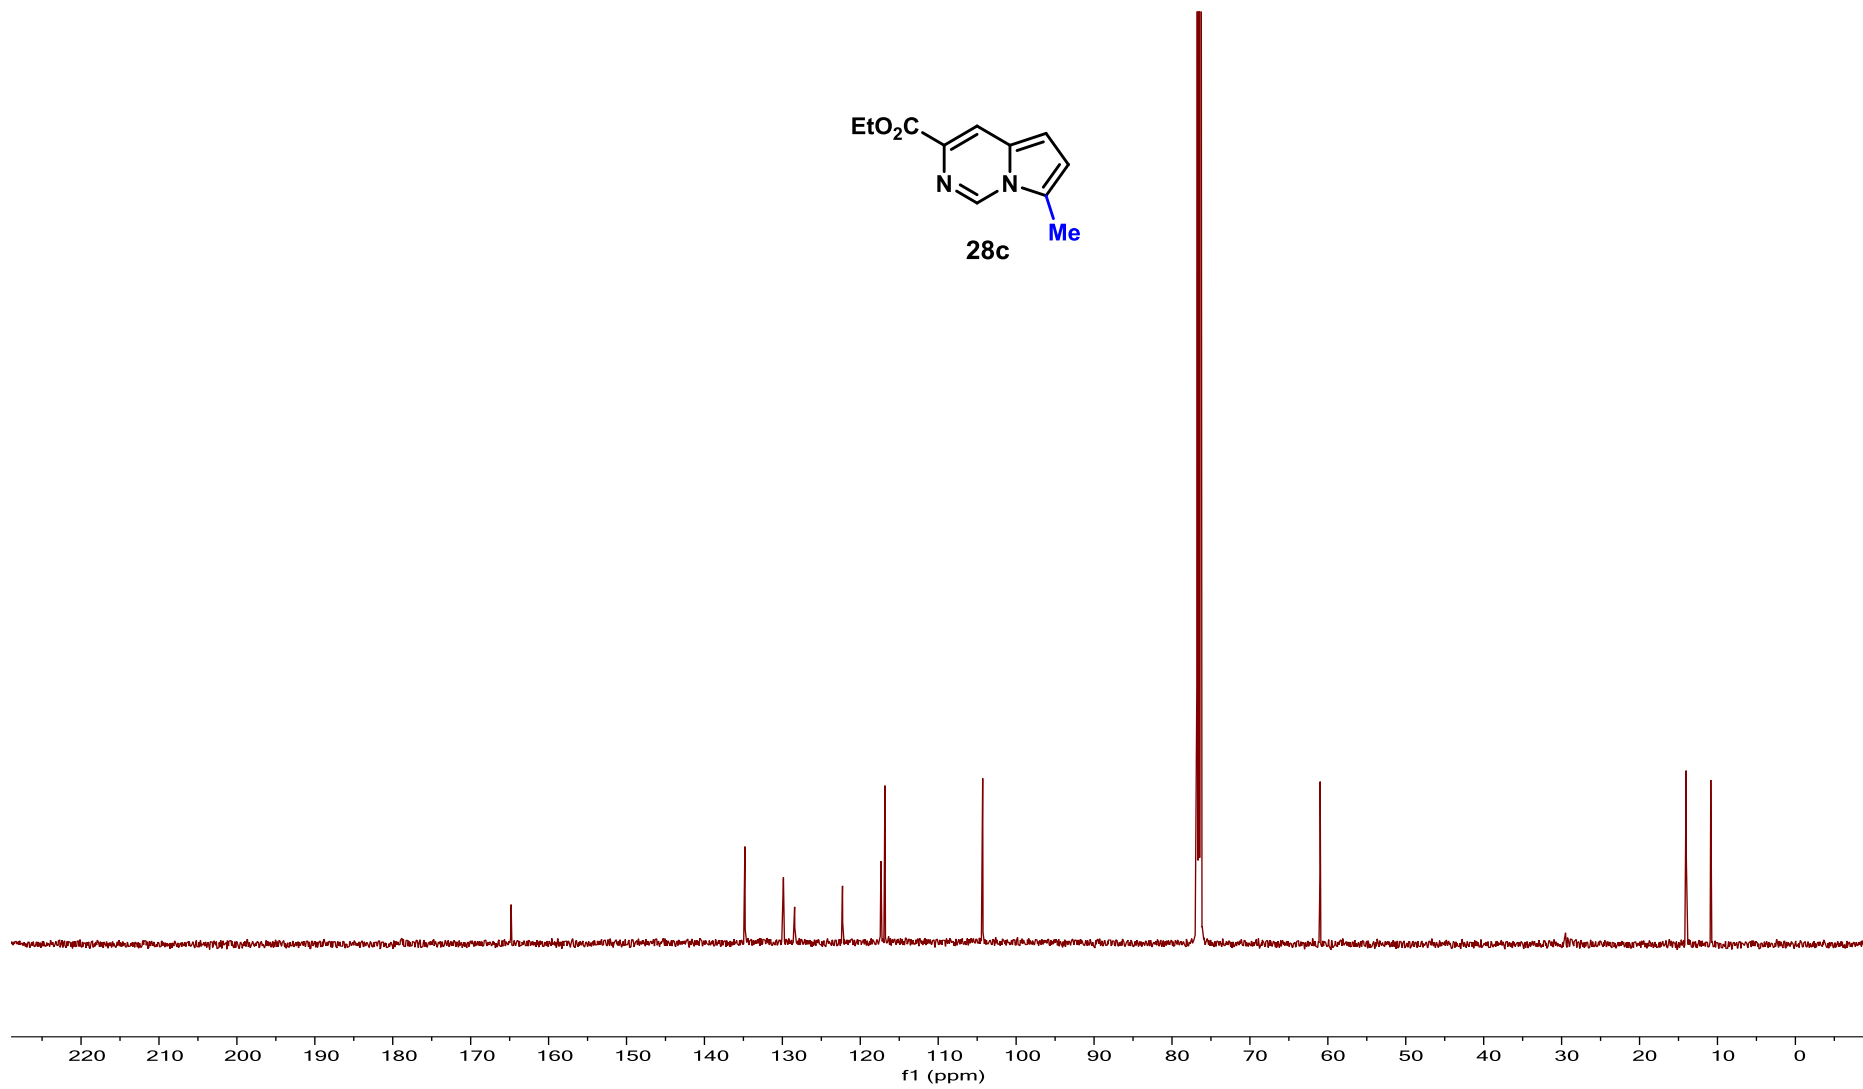

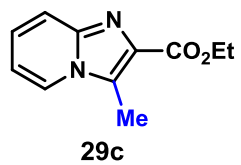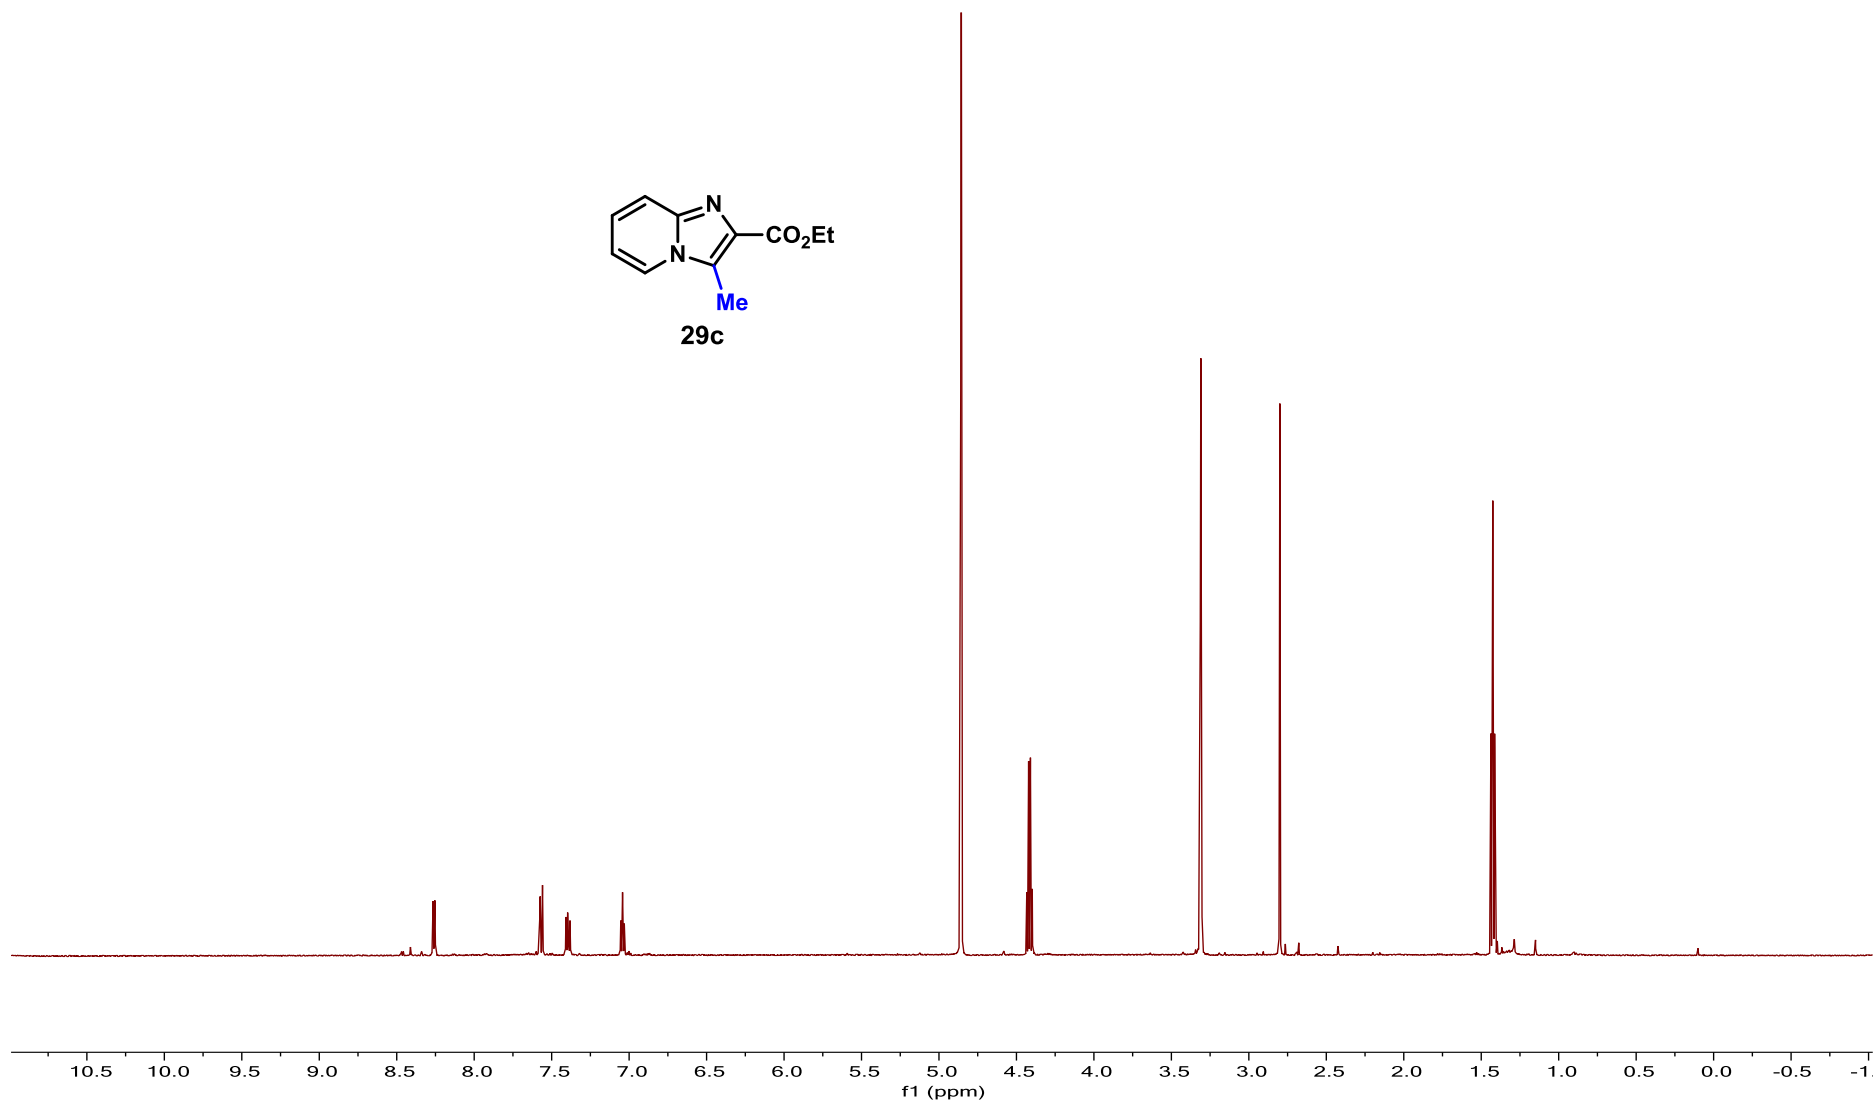

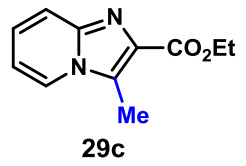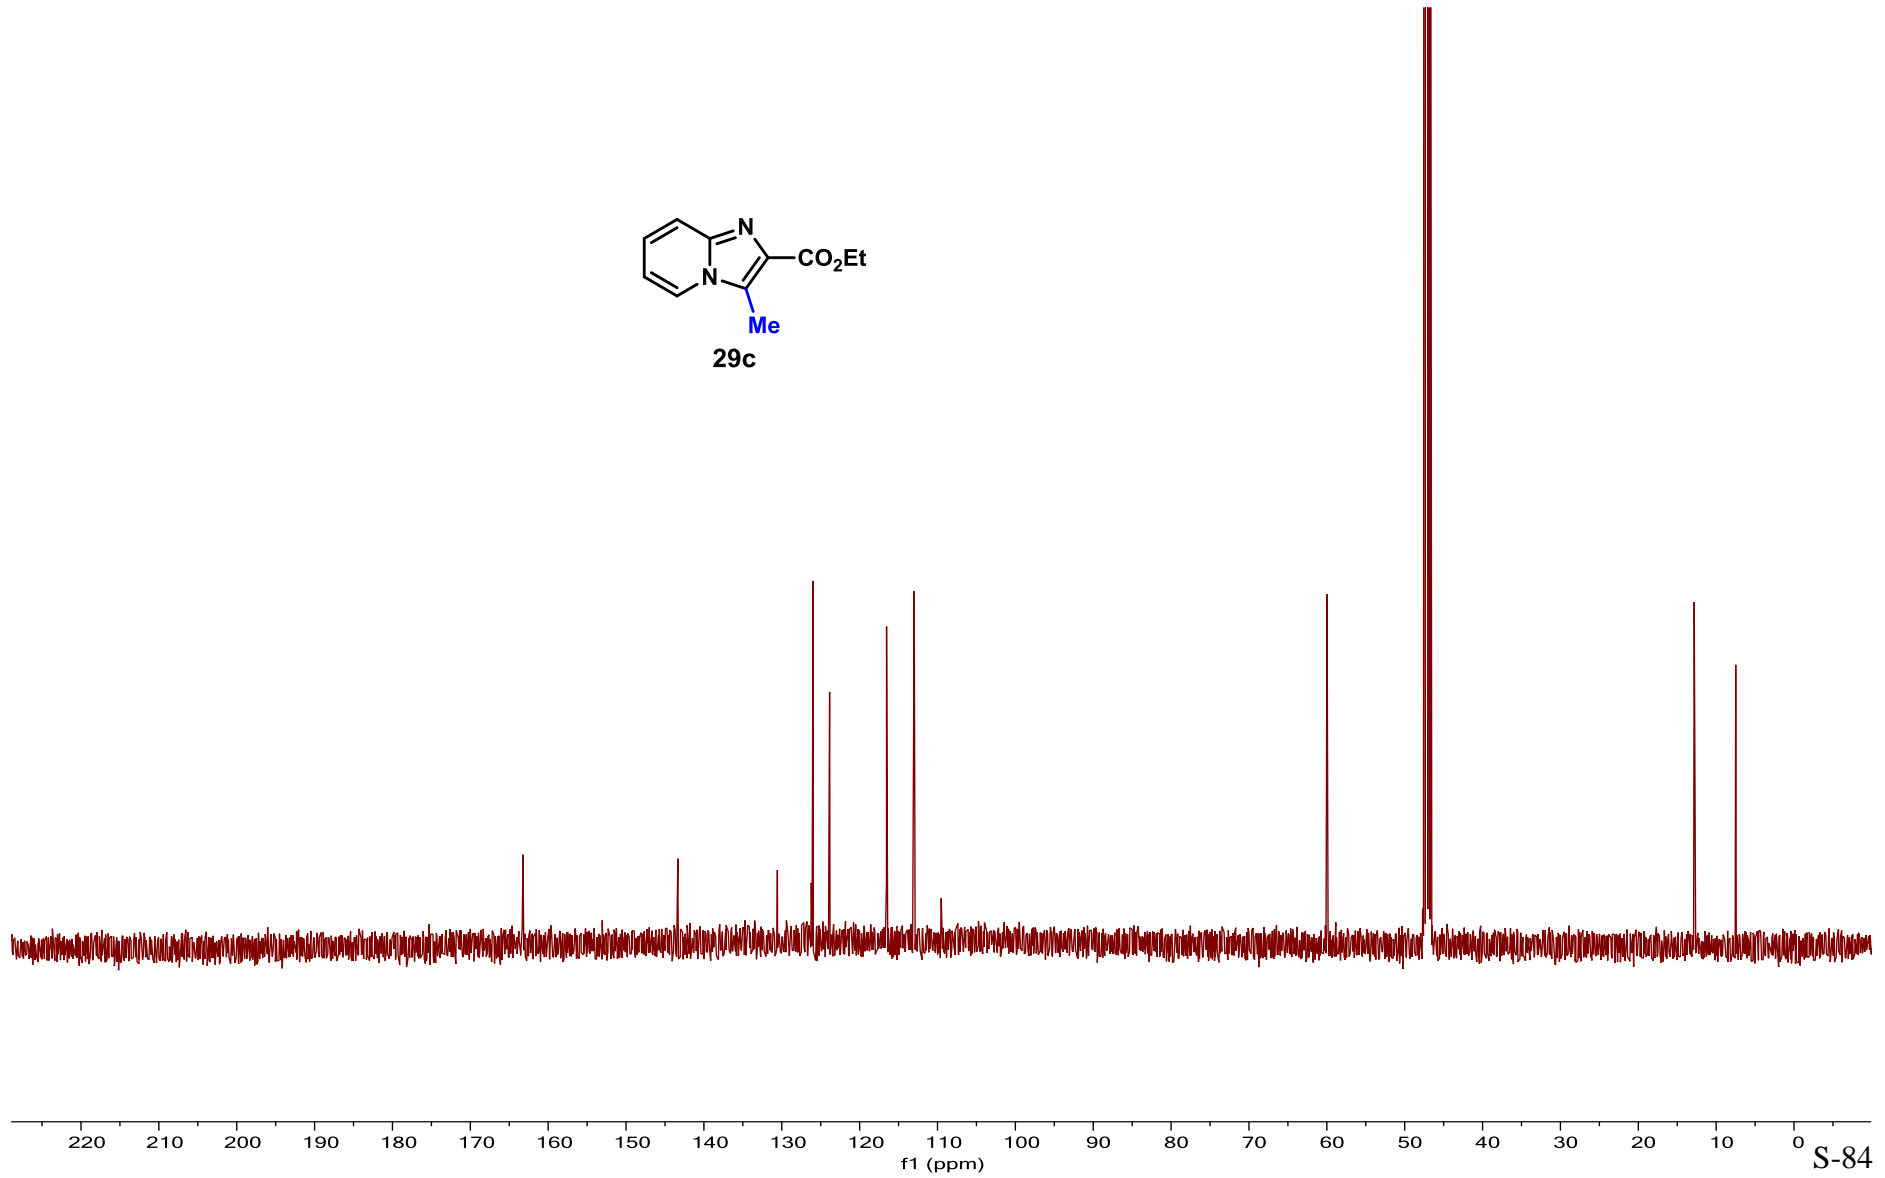

## 5. NMR Spectra of phenylsulfonylmethyl derived products 7d to 7f

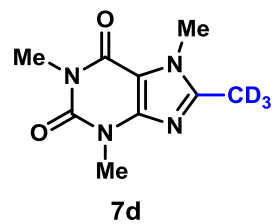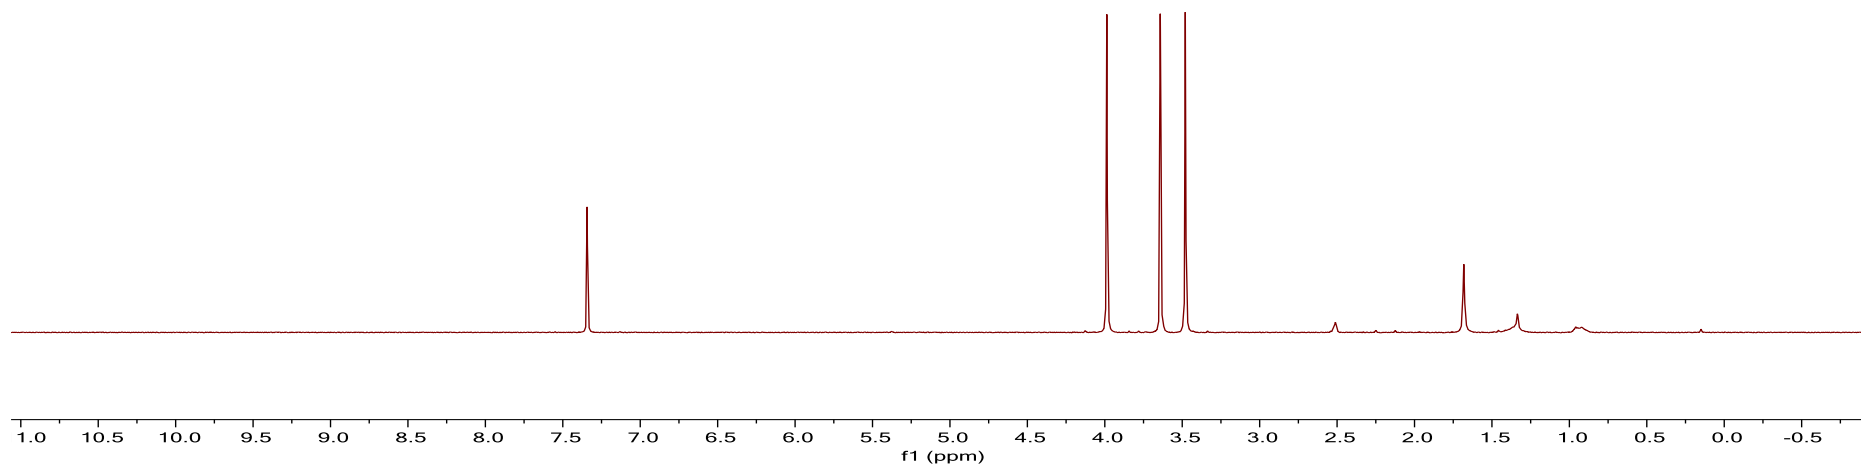

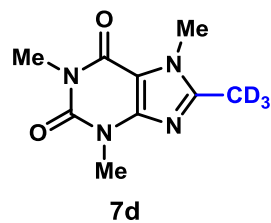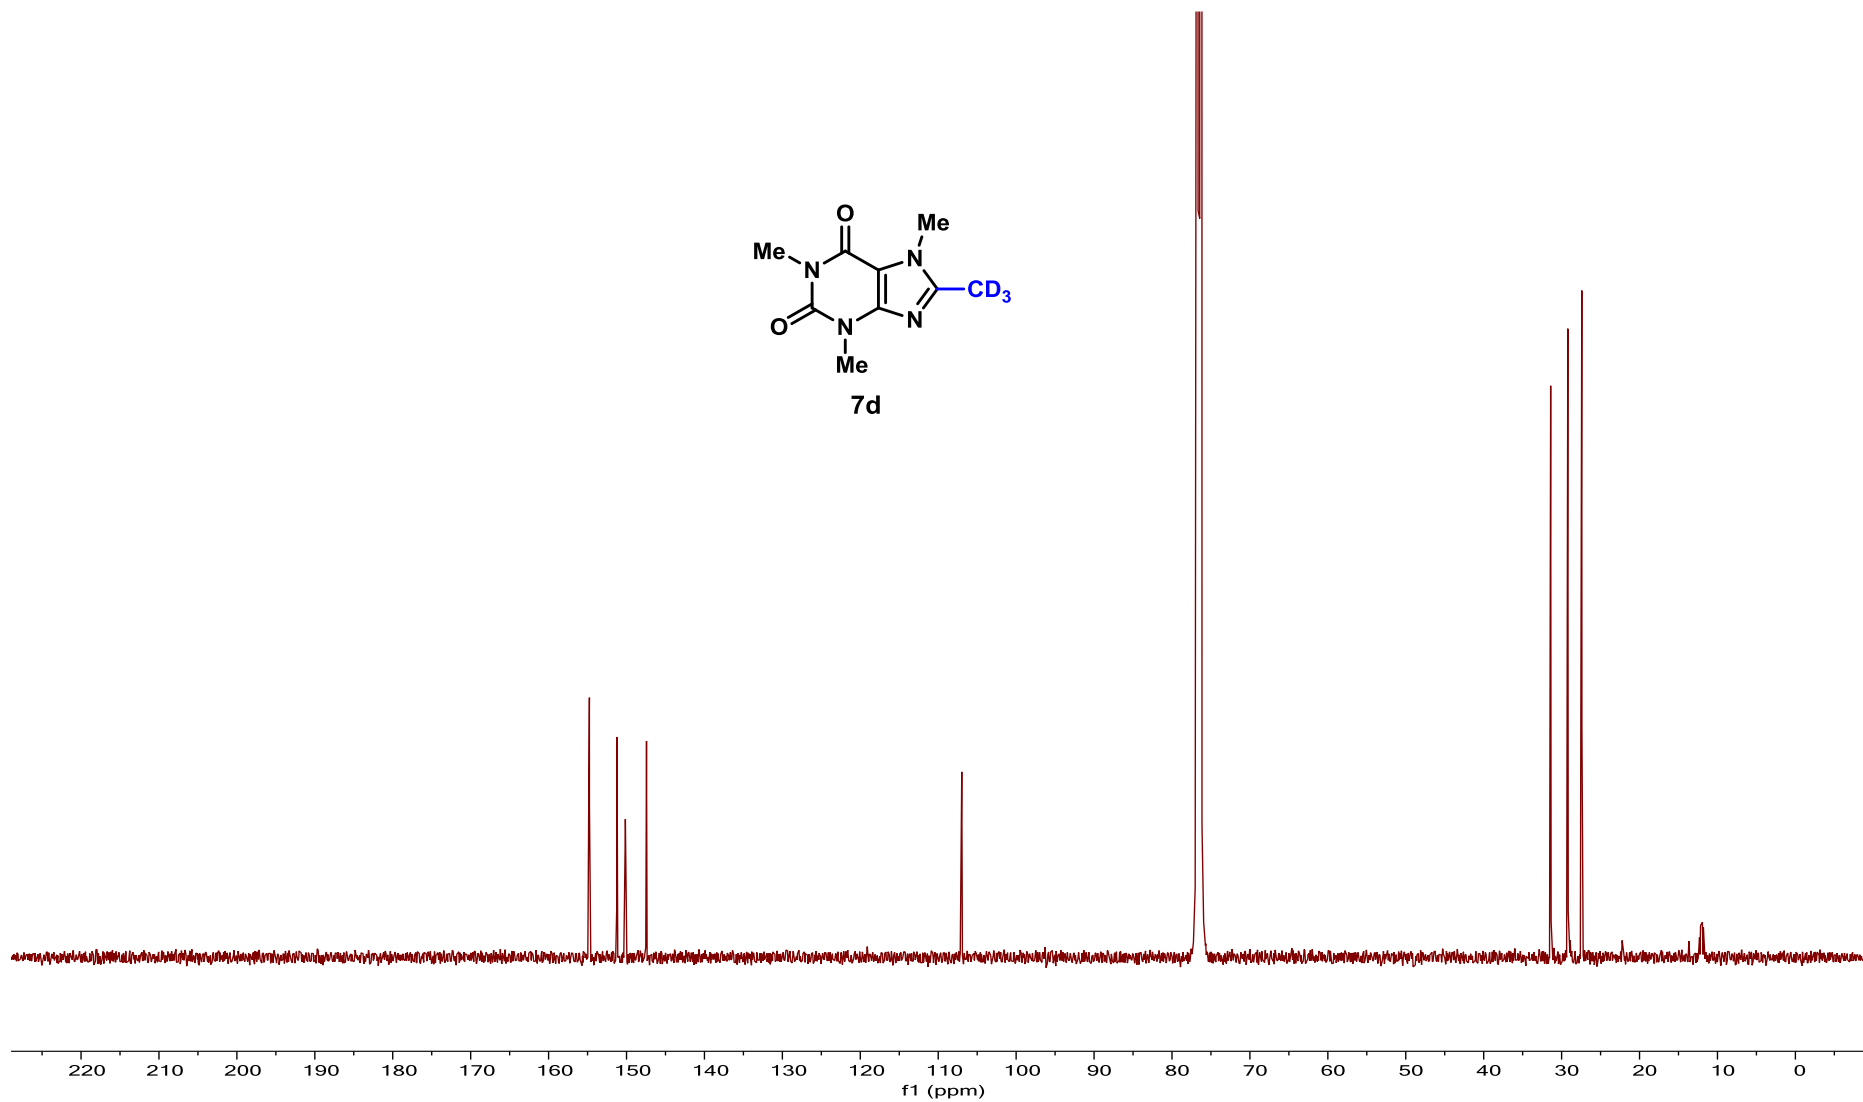

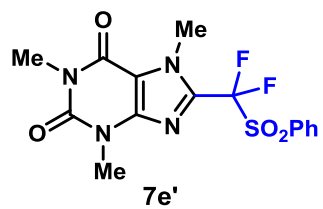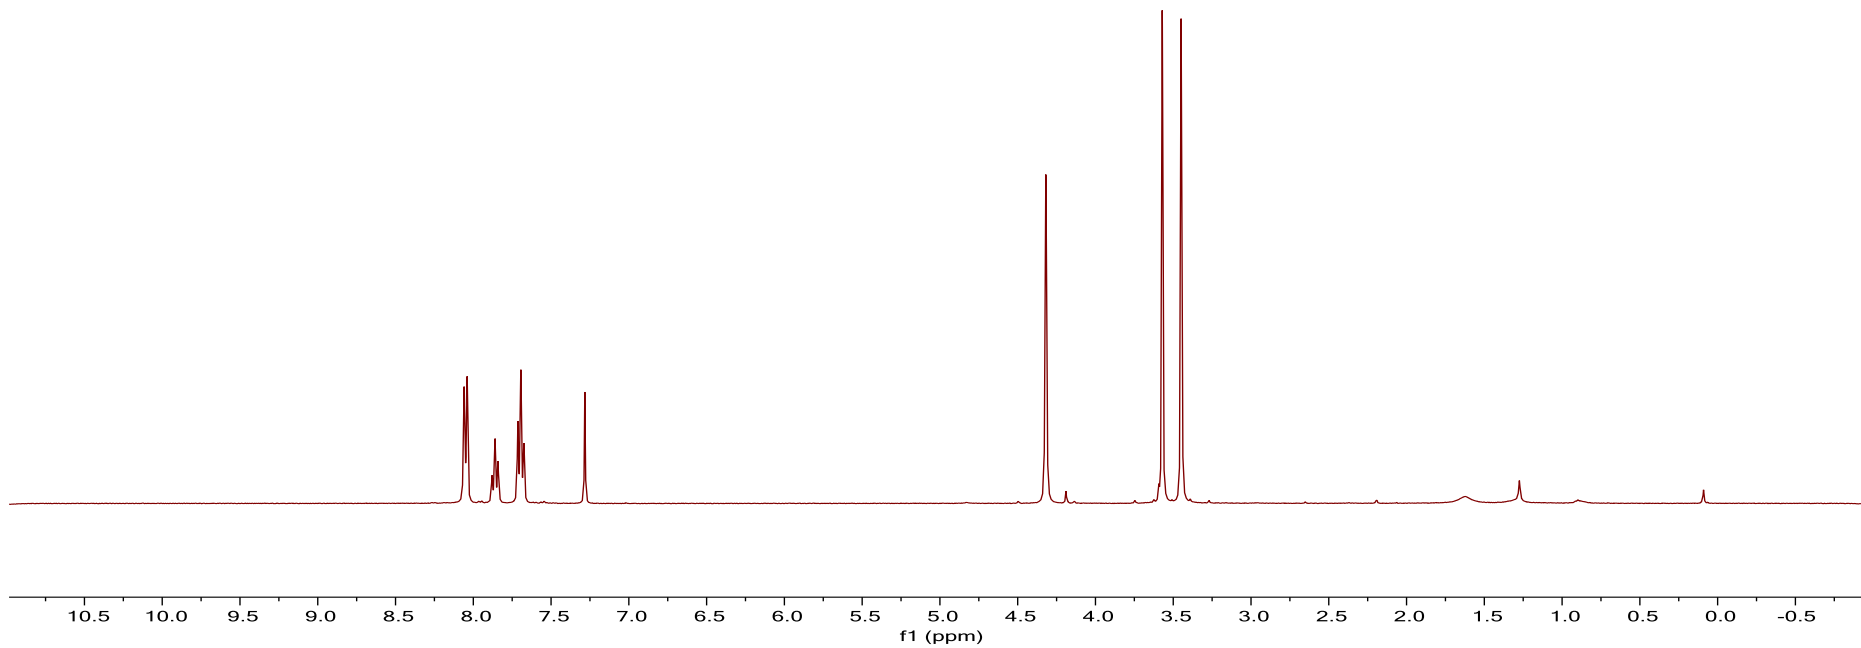

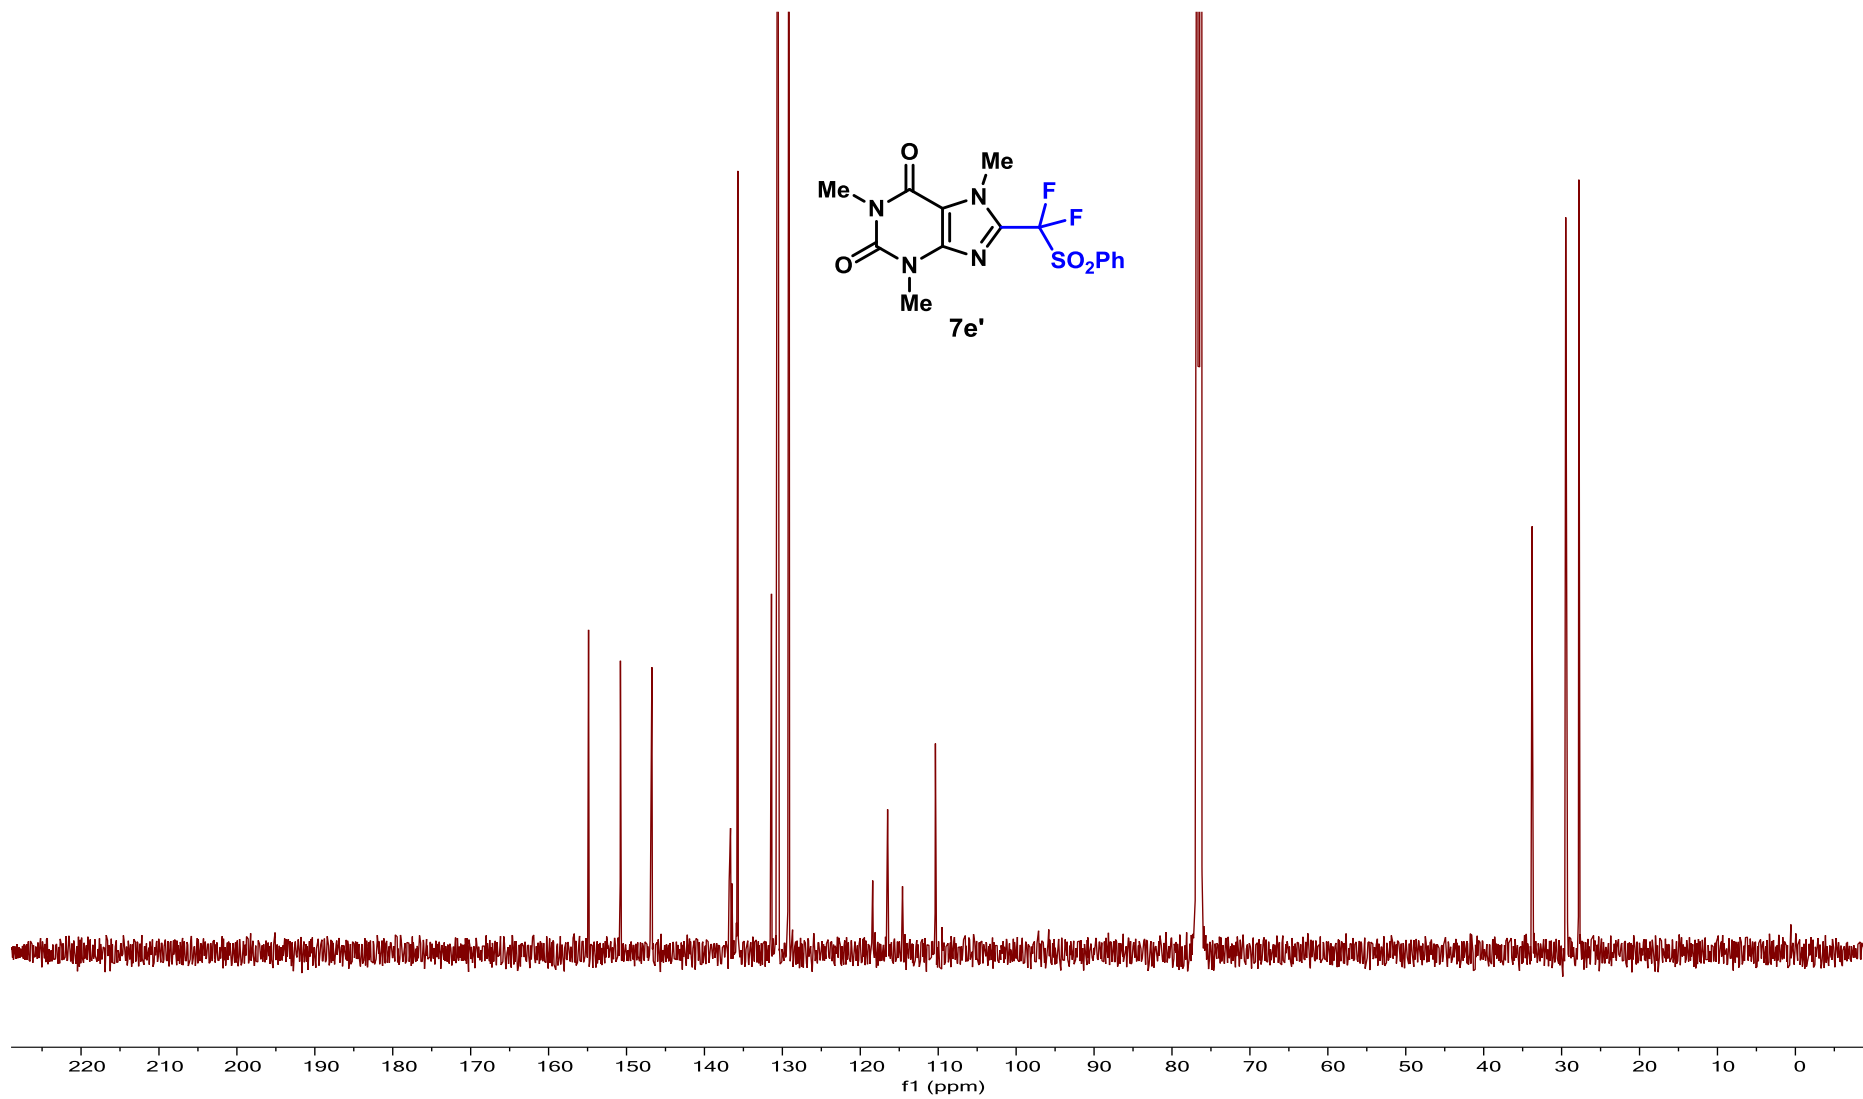



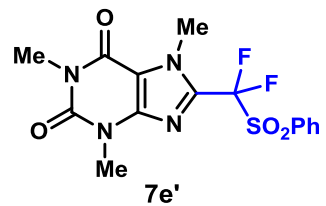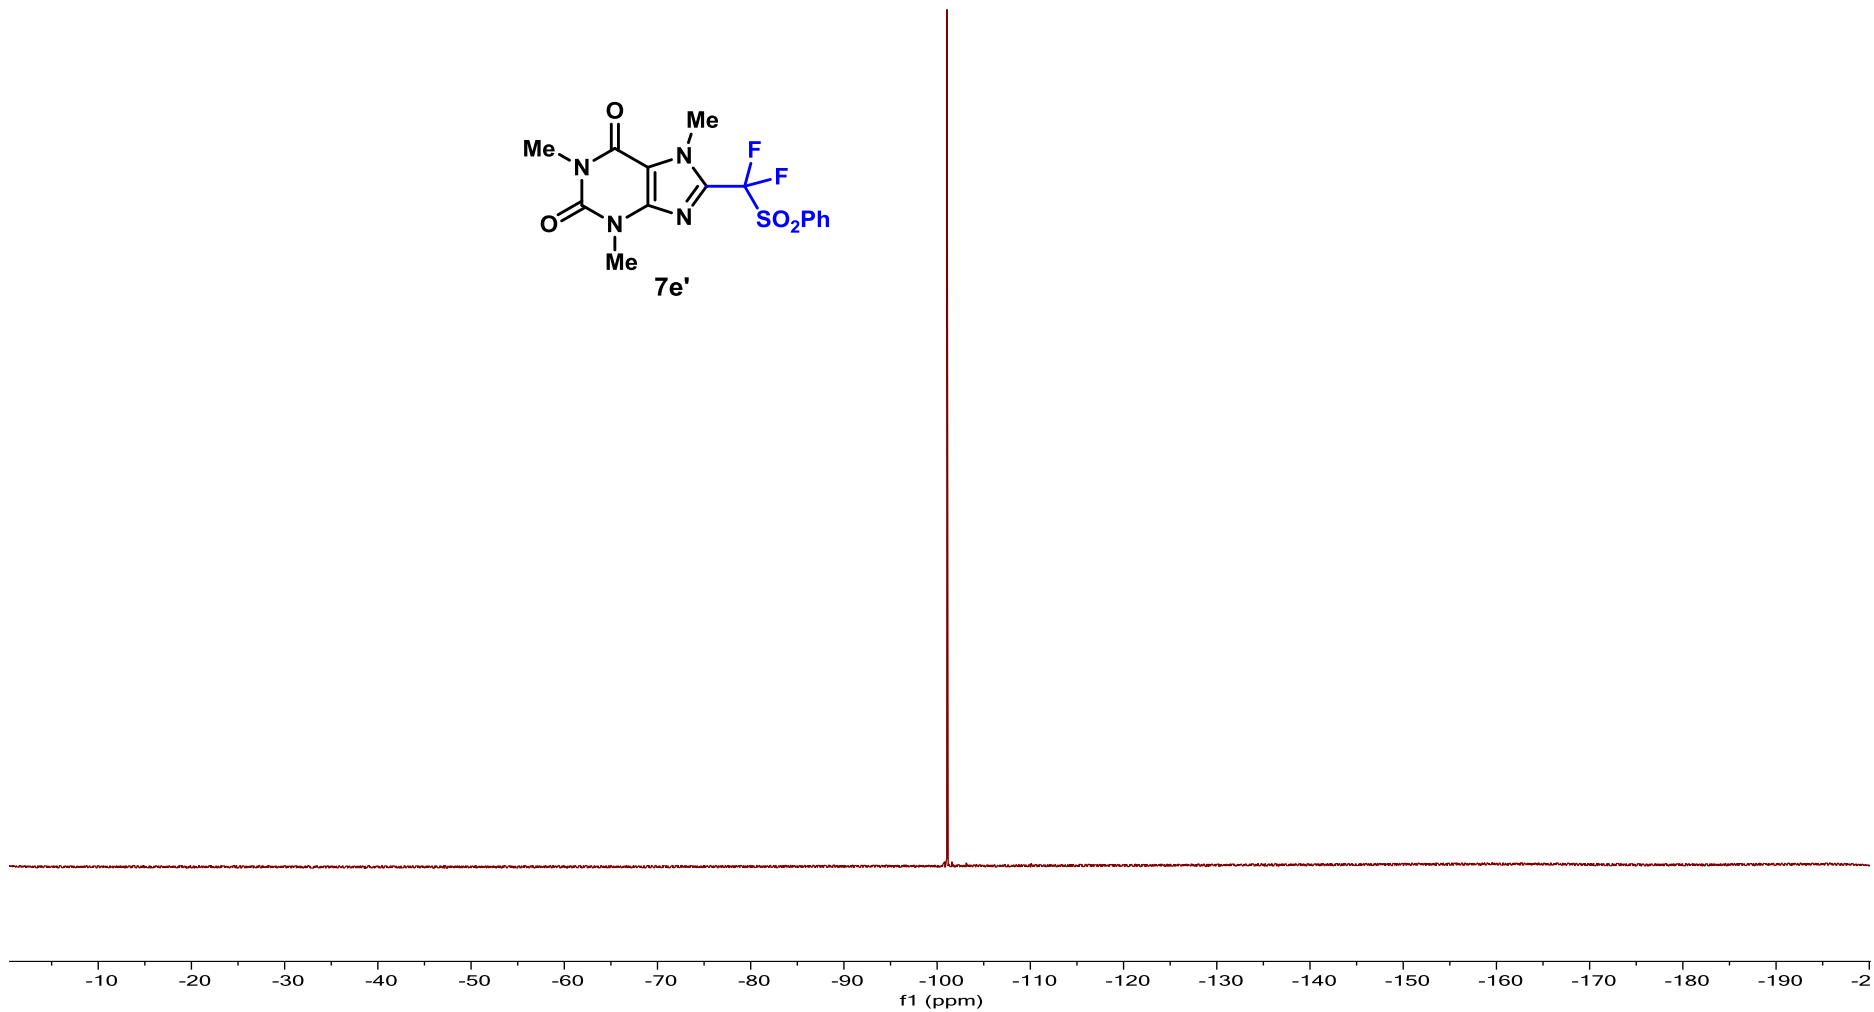

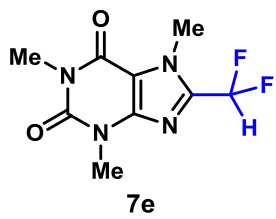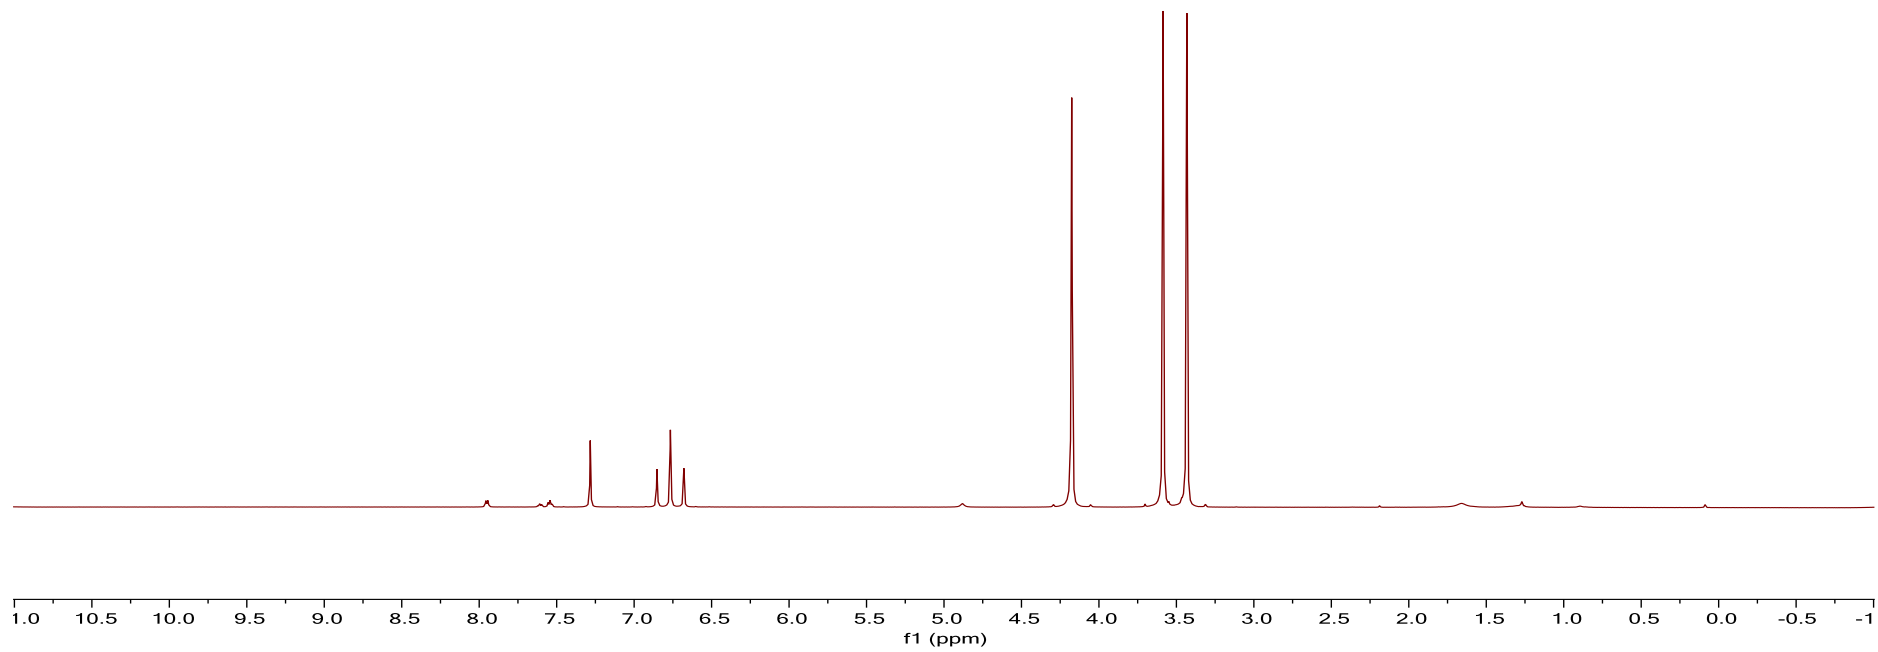

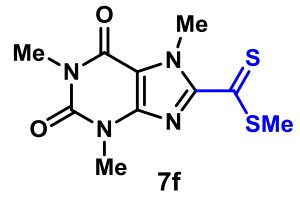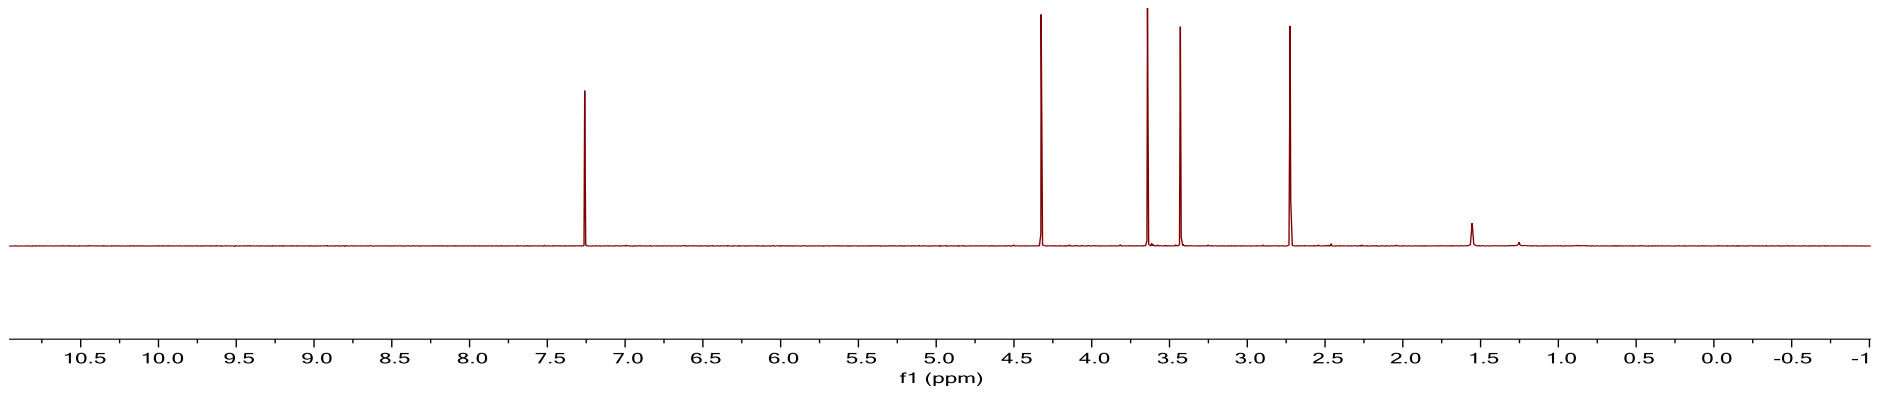

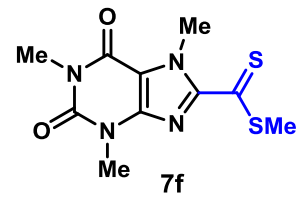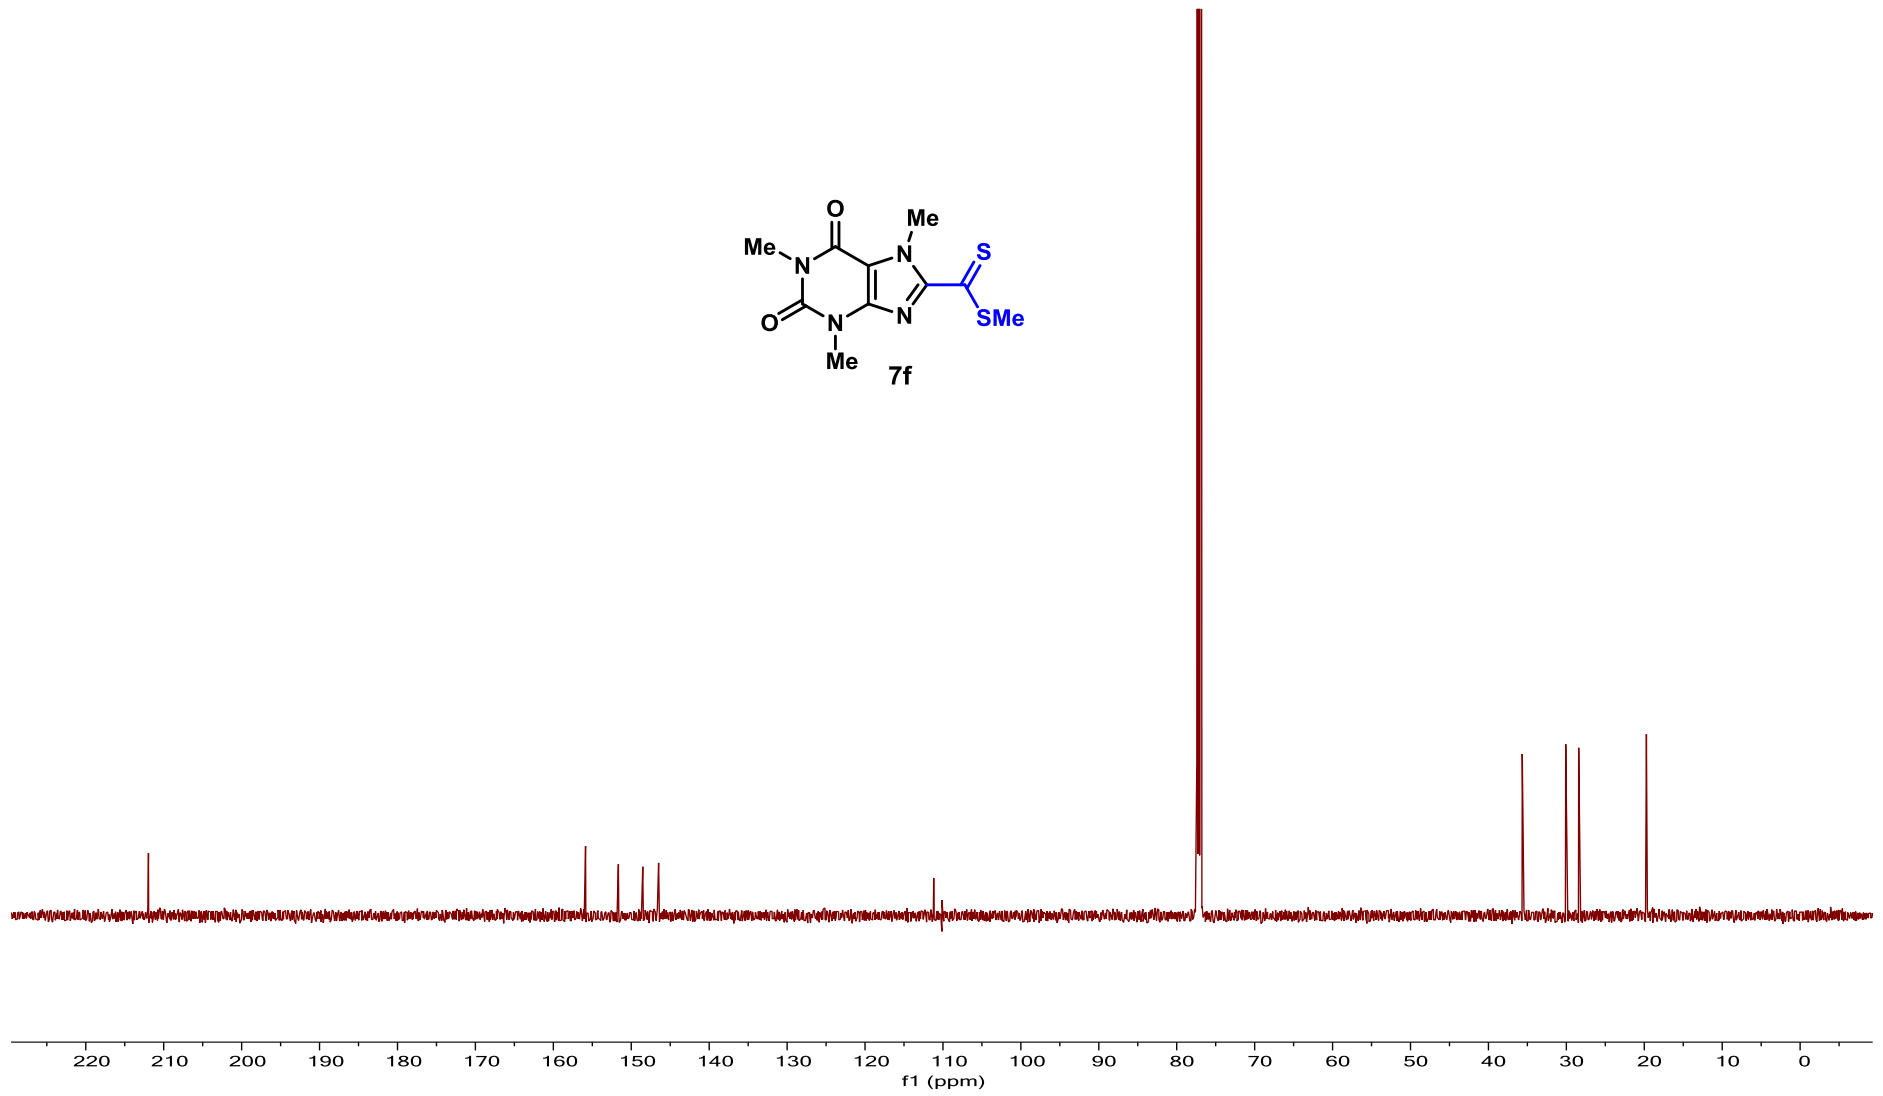

## 6. NMR Spectra of biologically important products 37c to 39c

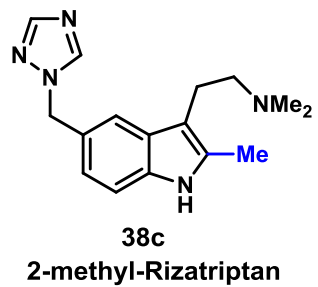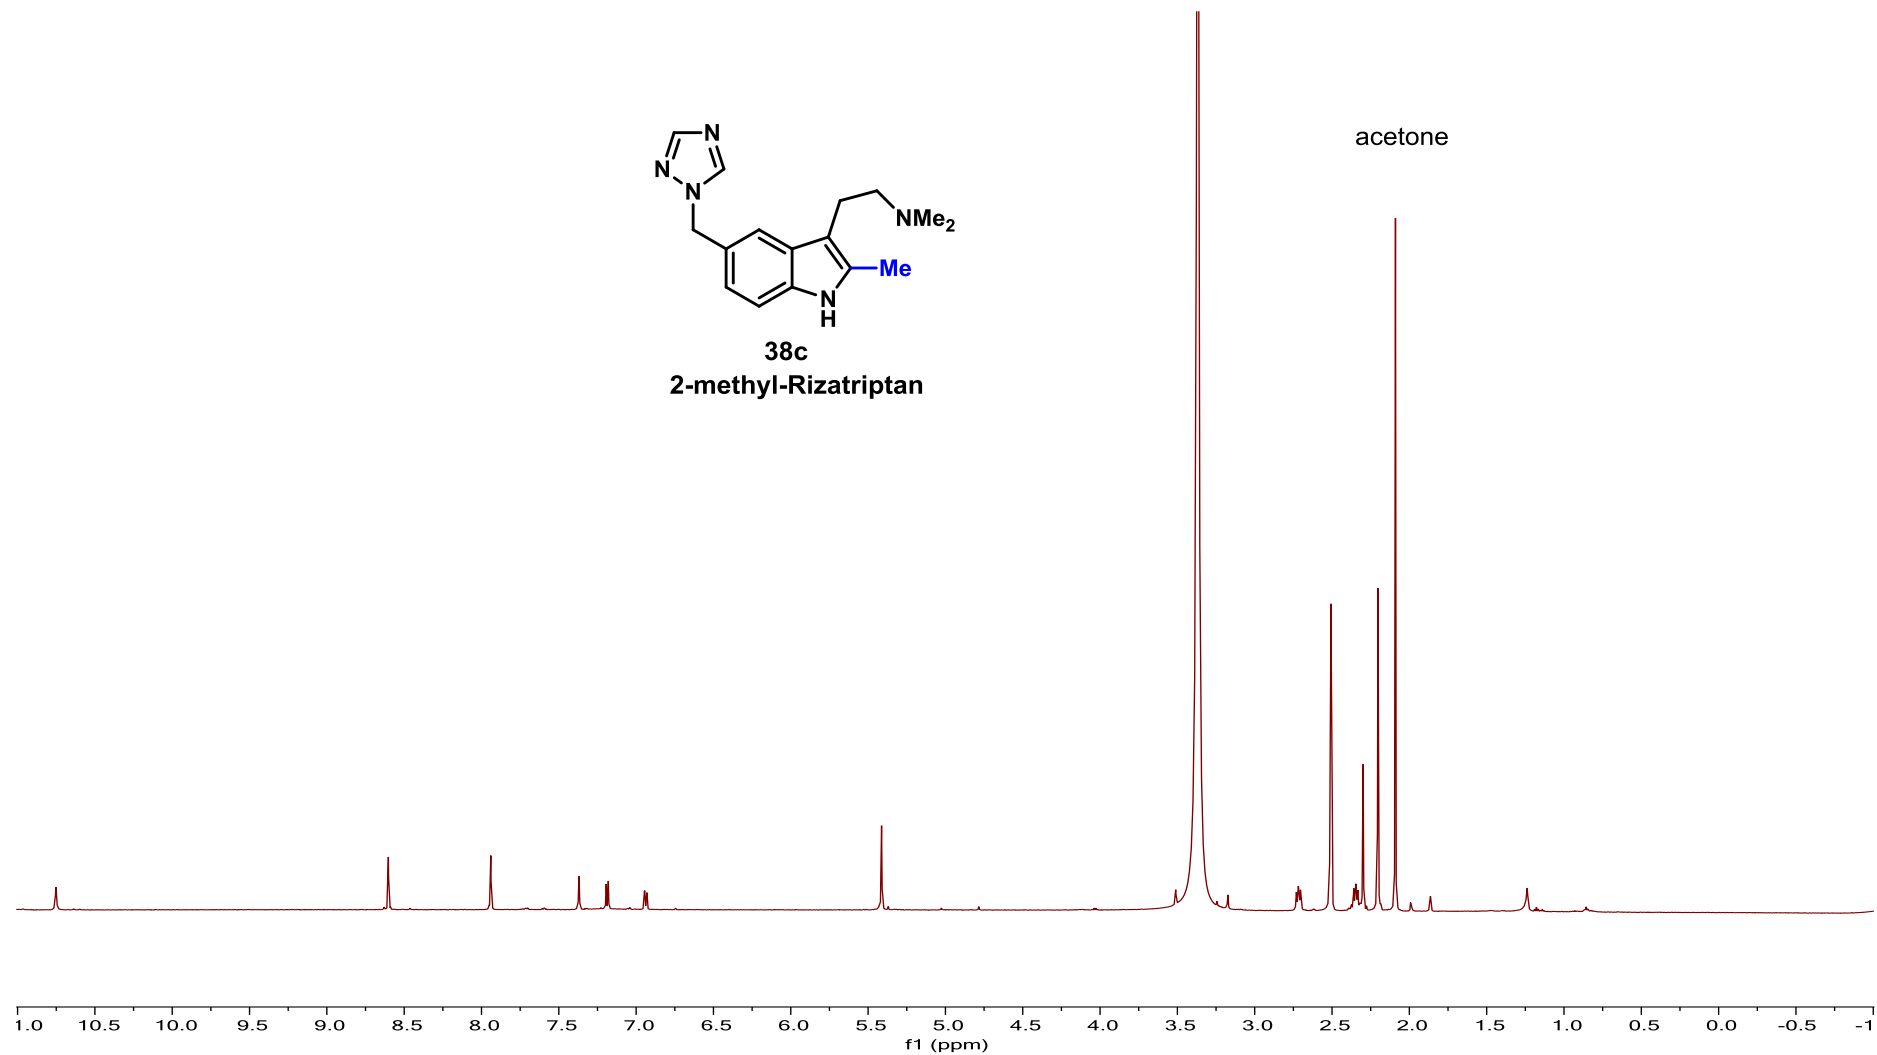

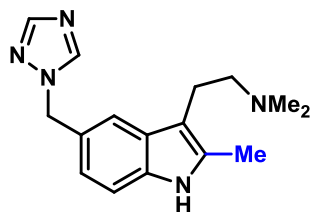

38c  
2-methyl-Rizatriptan

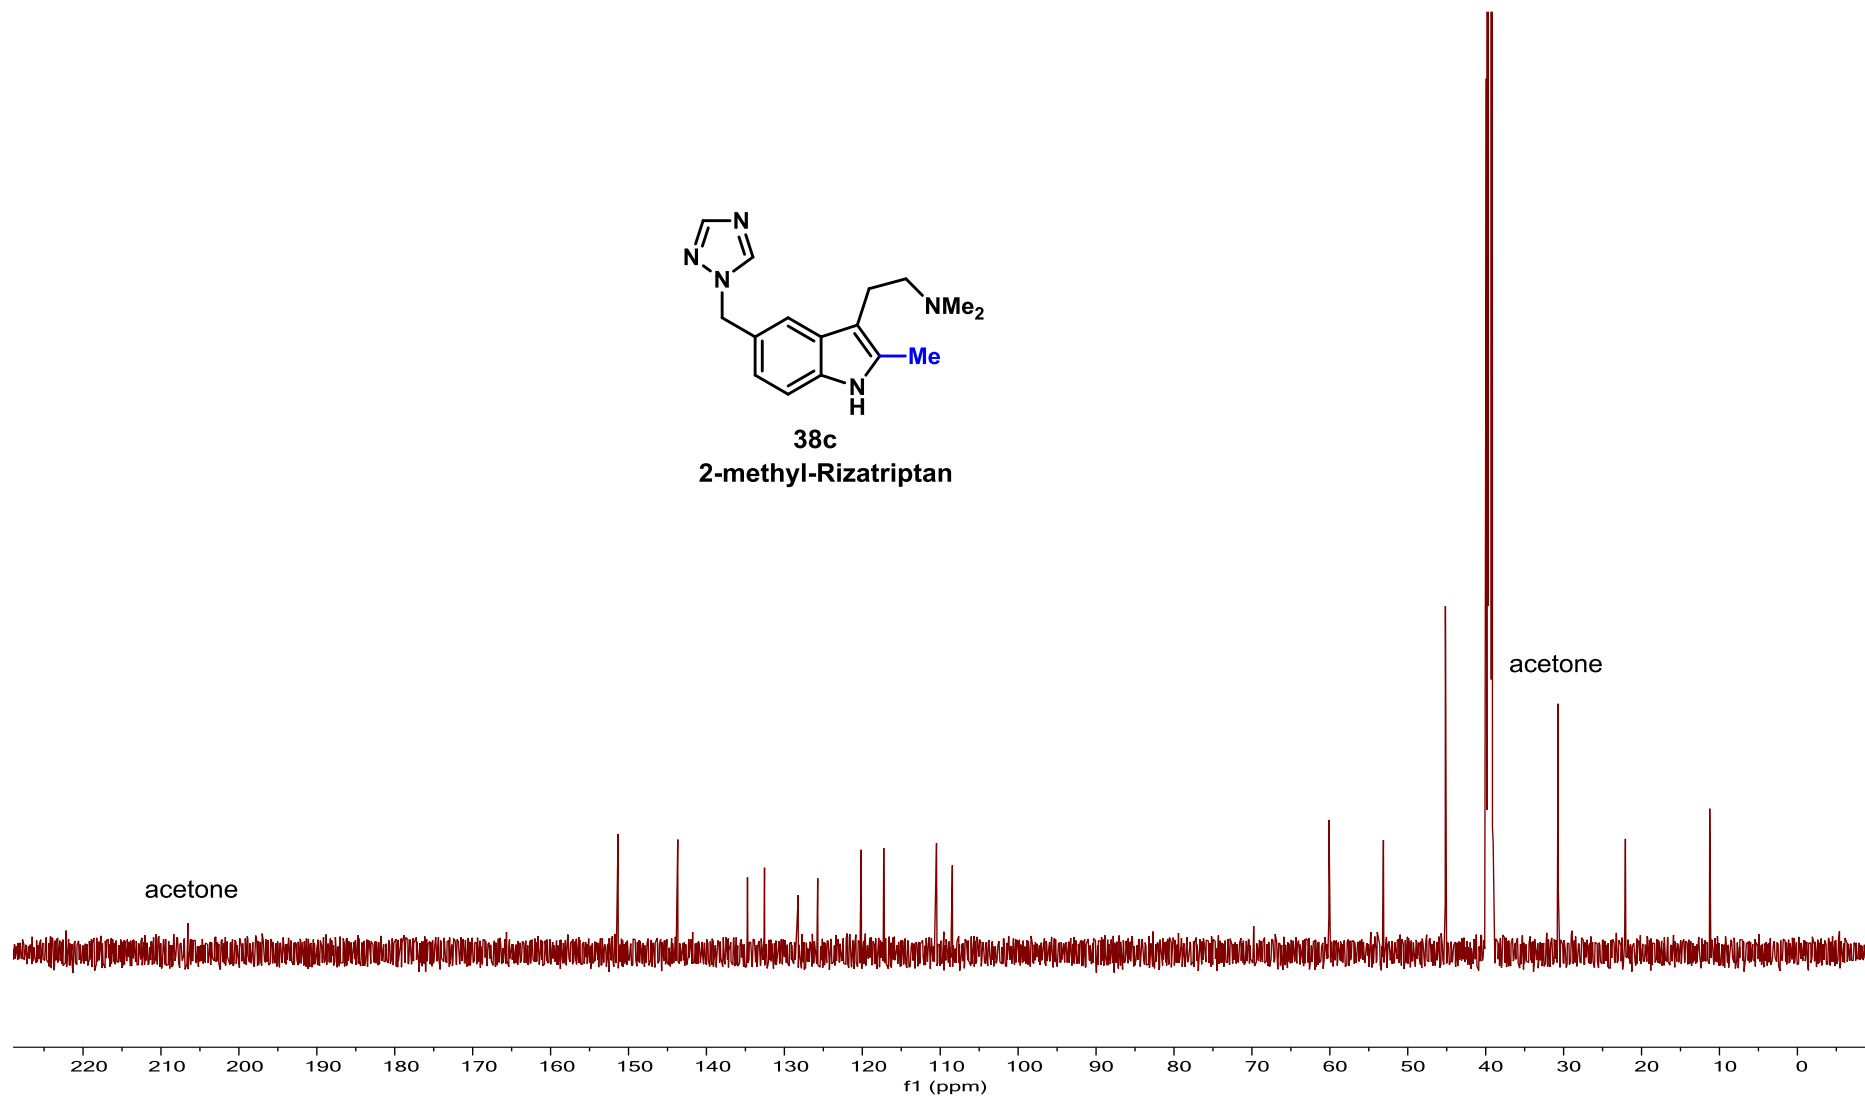

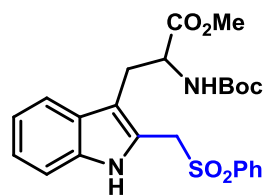

*N*-Boc-tryptophan  
methyl ester analogue  
(**L-38b** and **D-38b**)

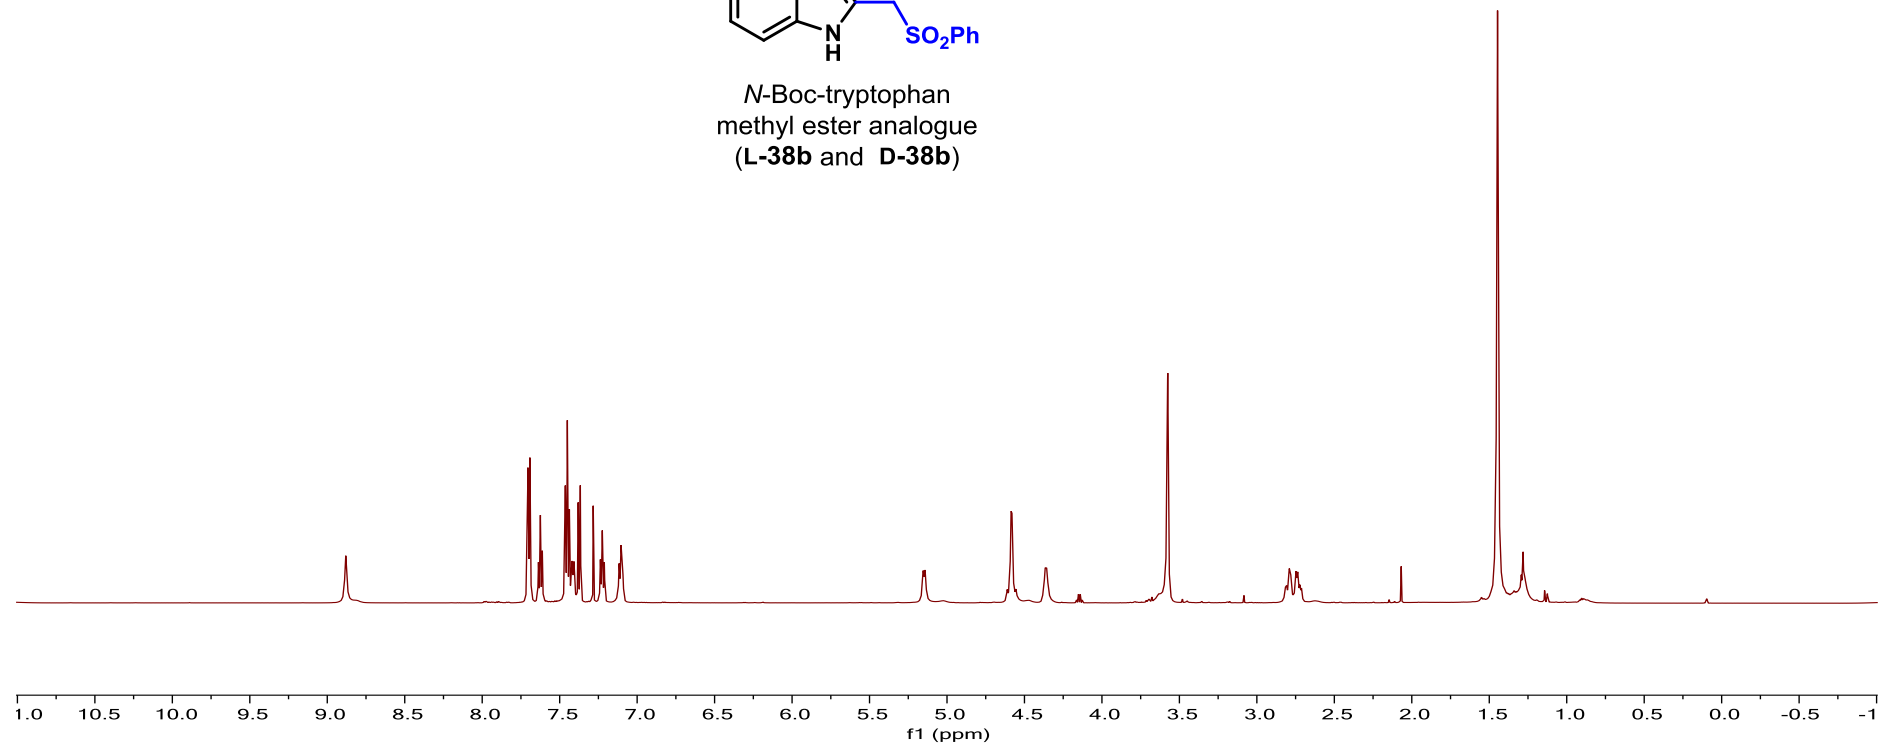

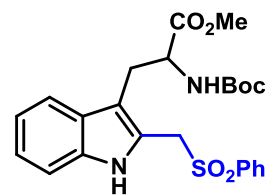

*N*-Boc-tryptophan  
methyl ester analogue  
(**L-38b** and **D-38b**)

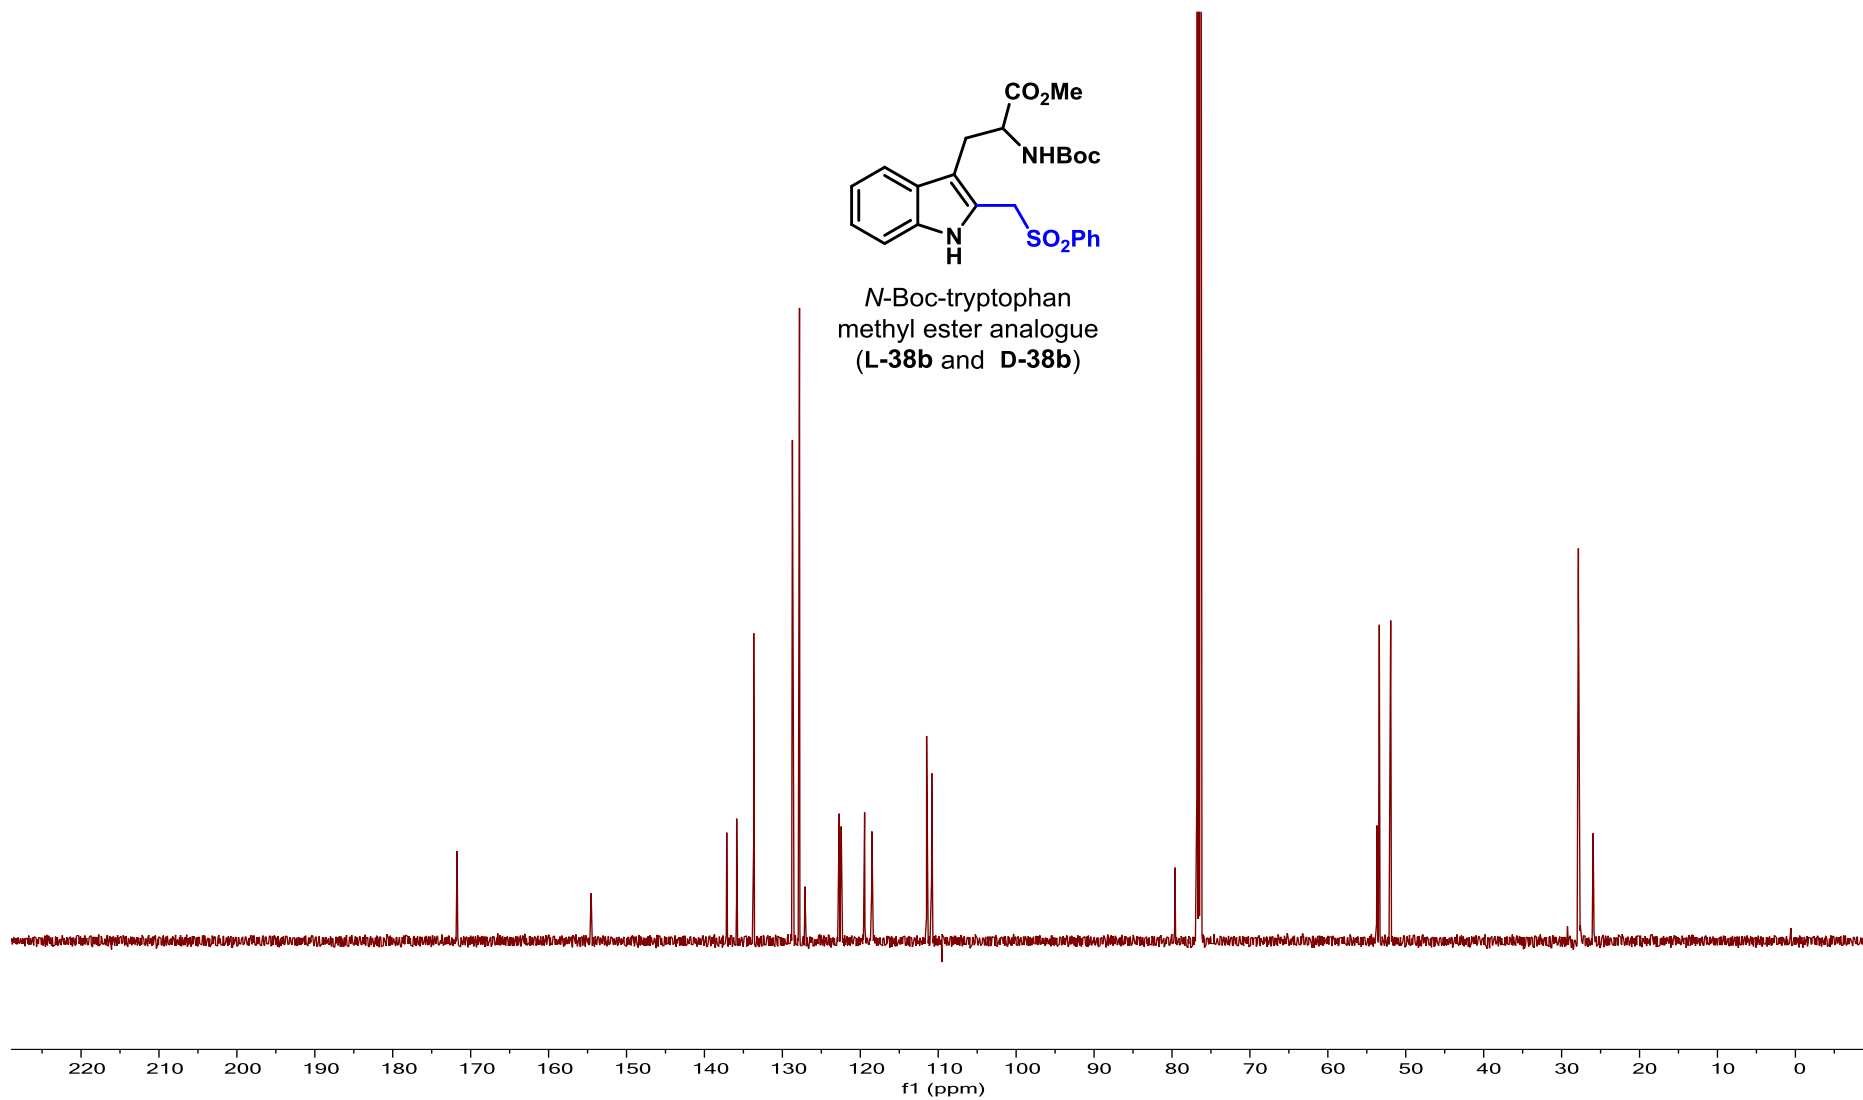



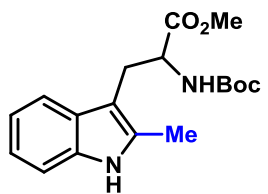

*N*-Boc-2-Me-tryptophan methyl ester  
(**L-38c** and **D-38c**)

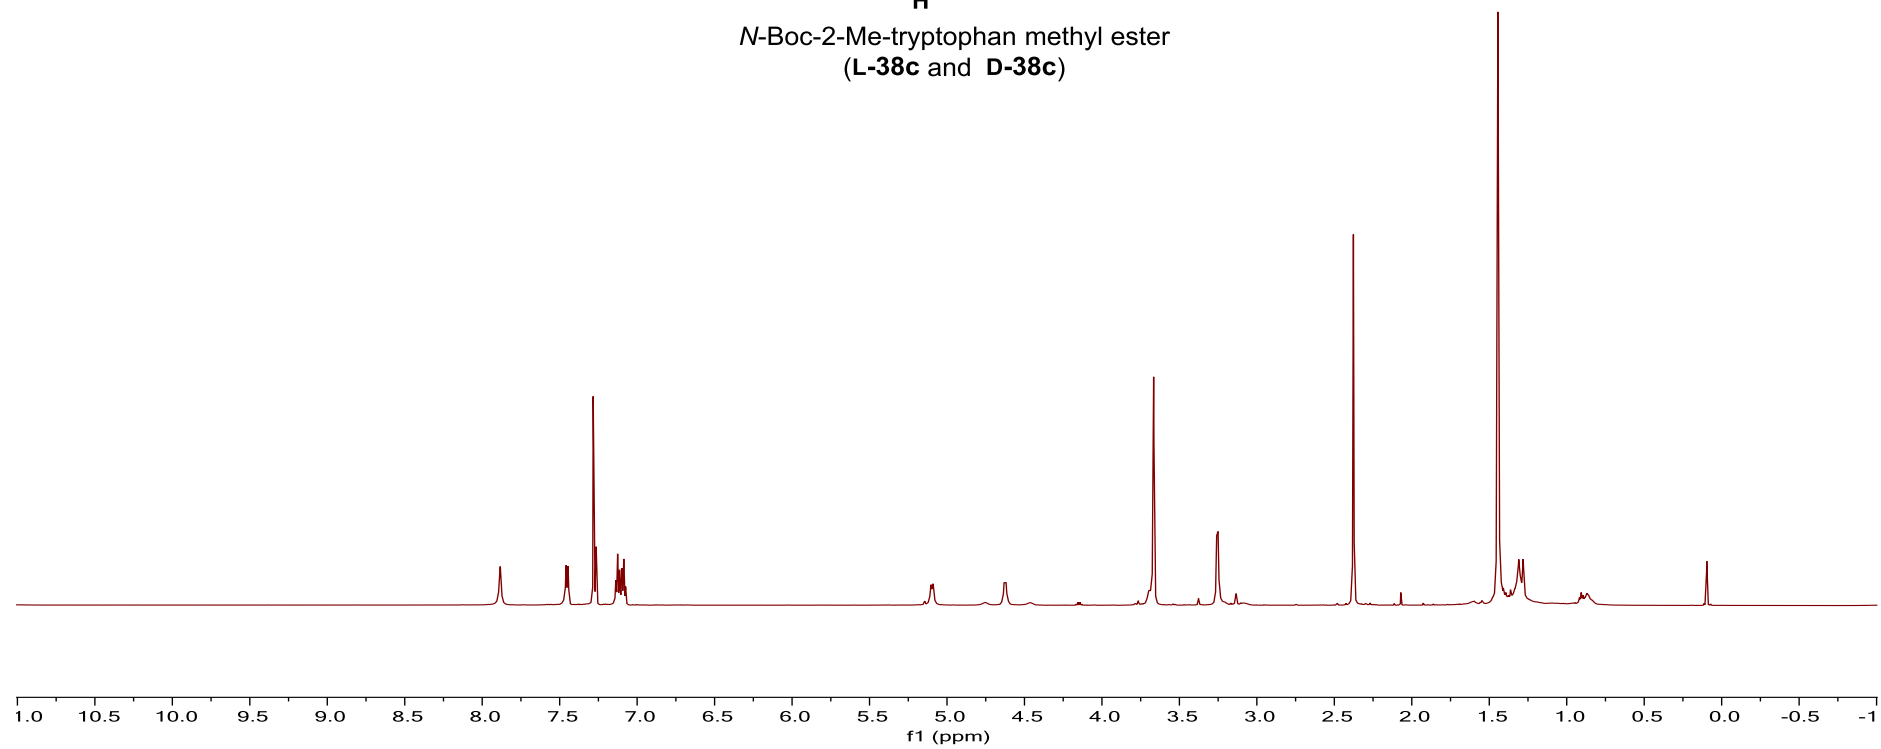

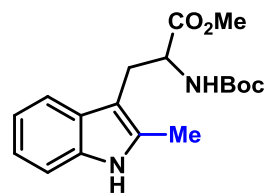

N-Boc-2-Me-tryptophan methyl ester  
(L-38c and D-38c)

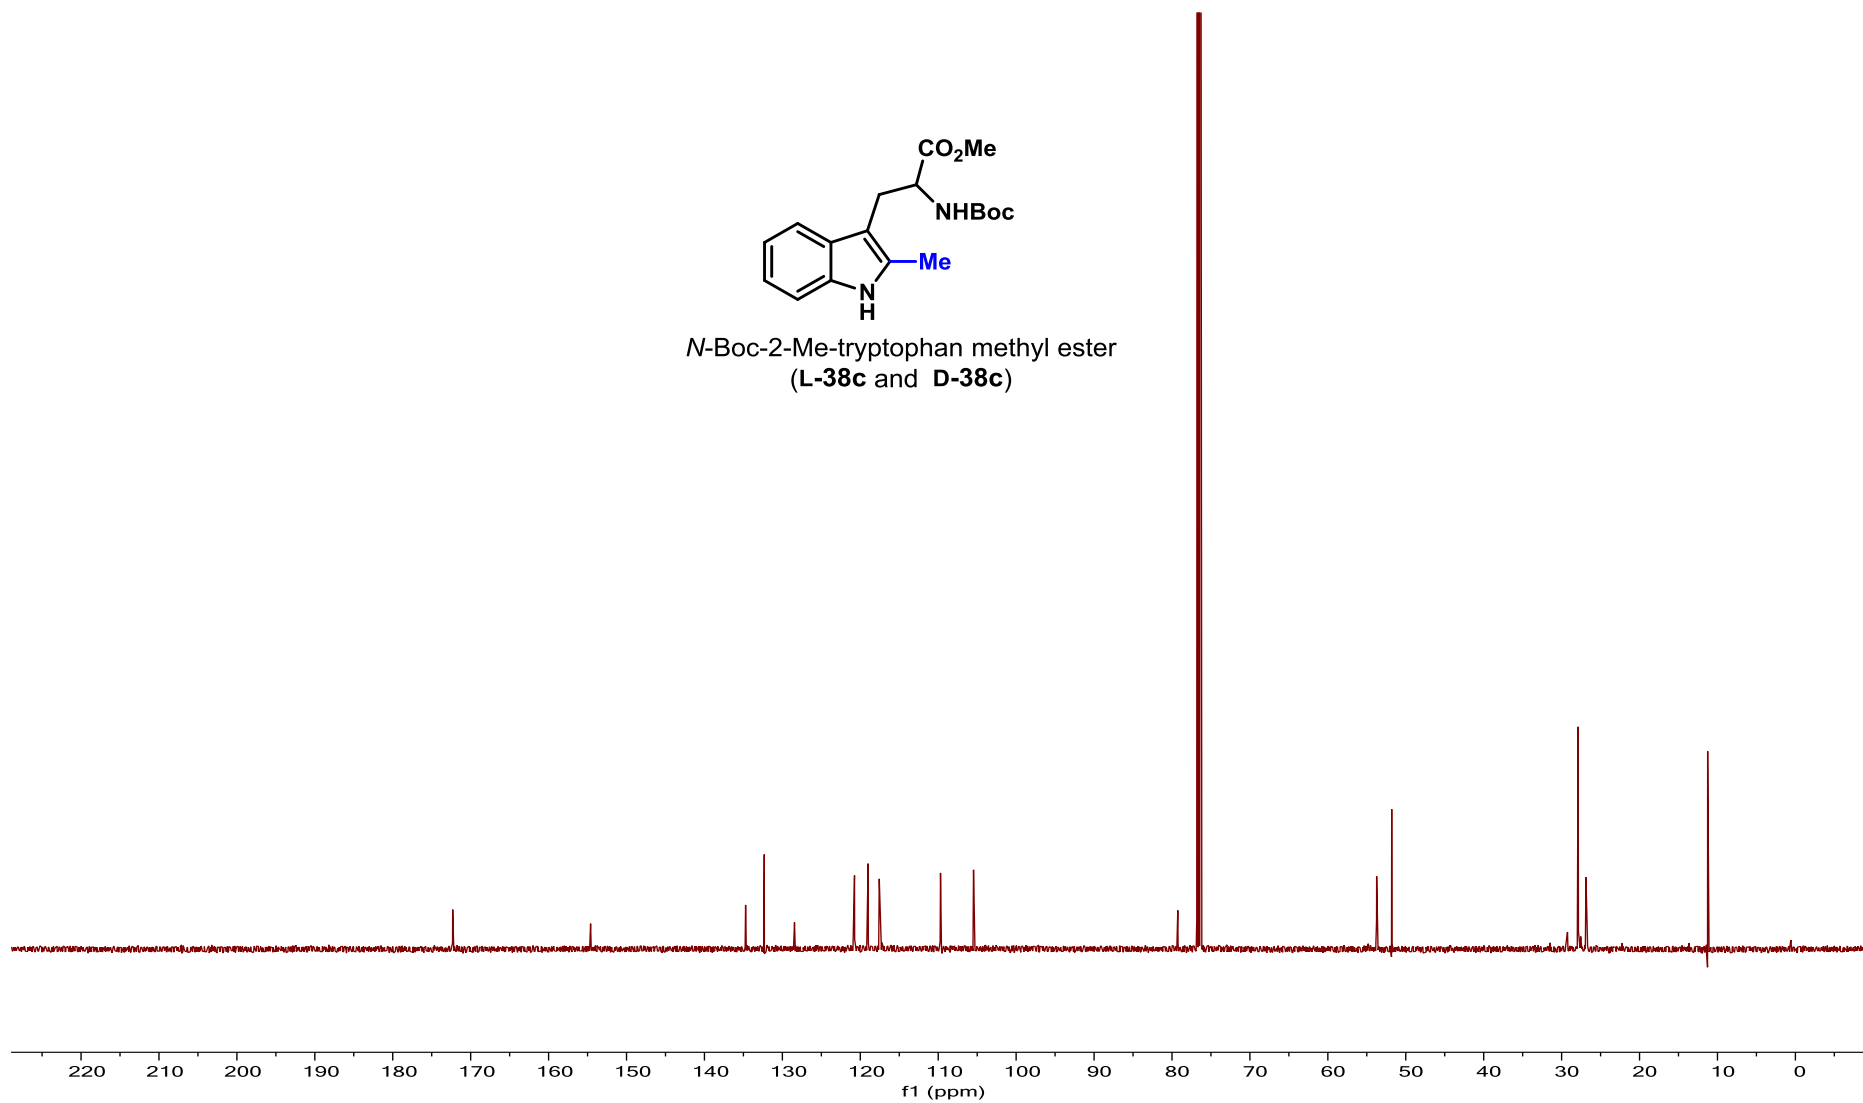

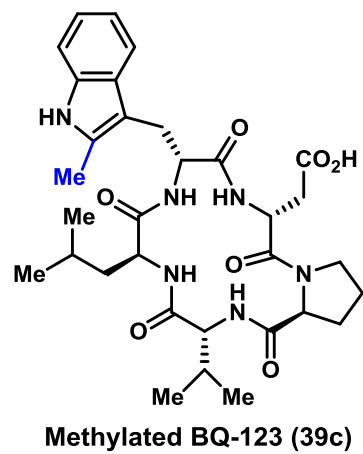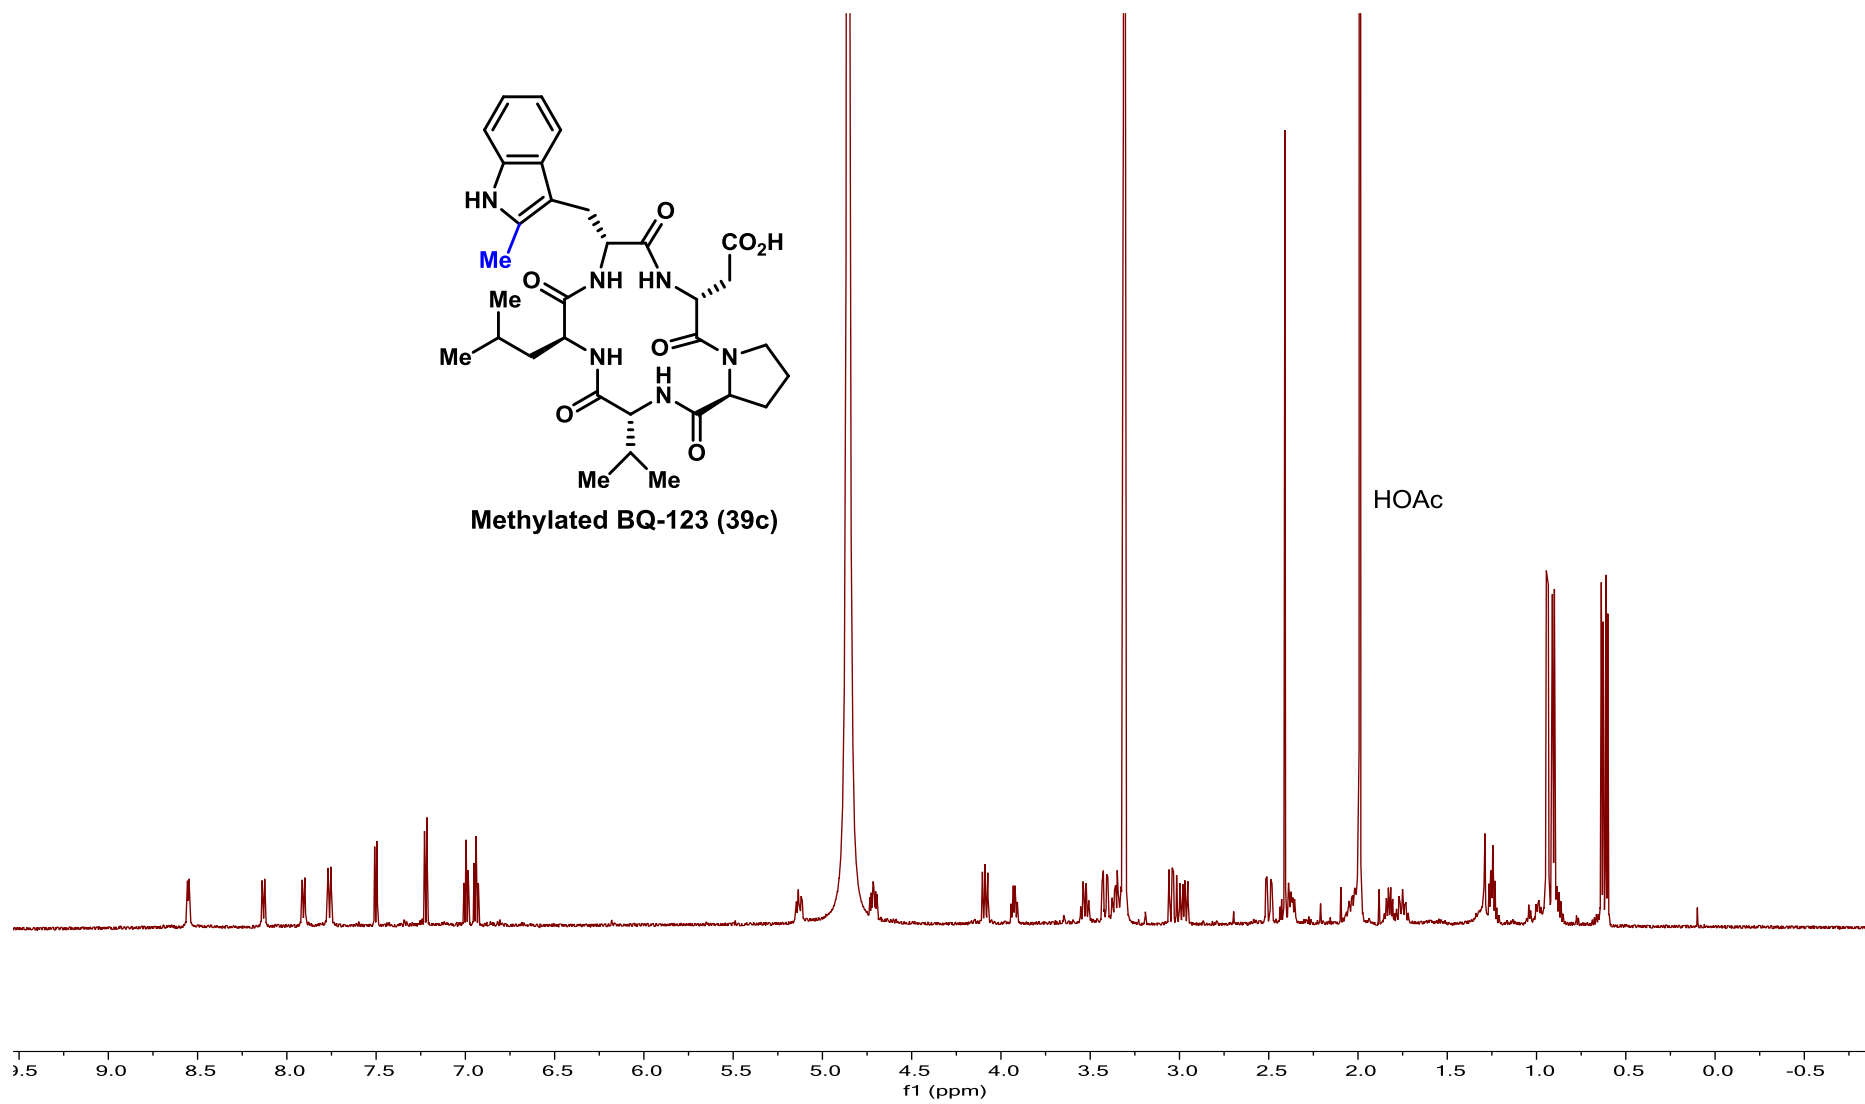

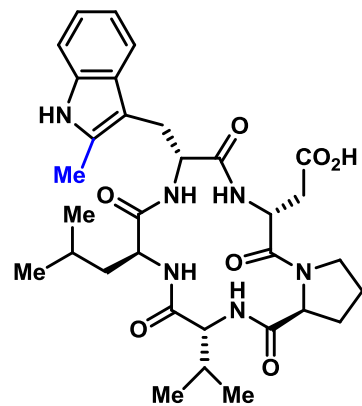

Methylated BQ-123 (39c)

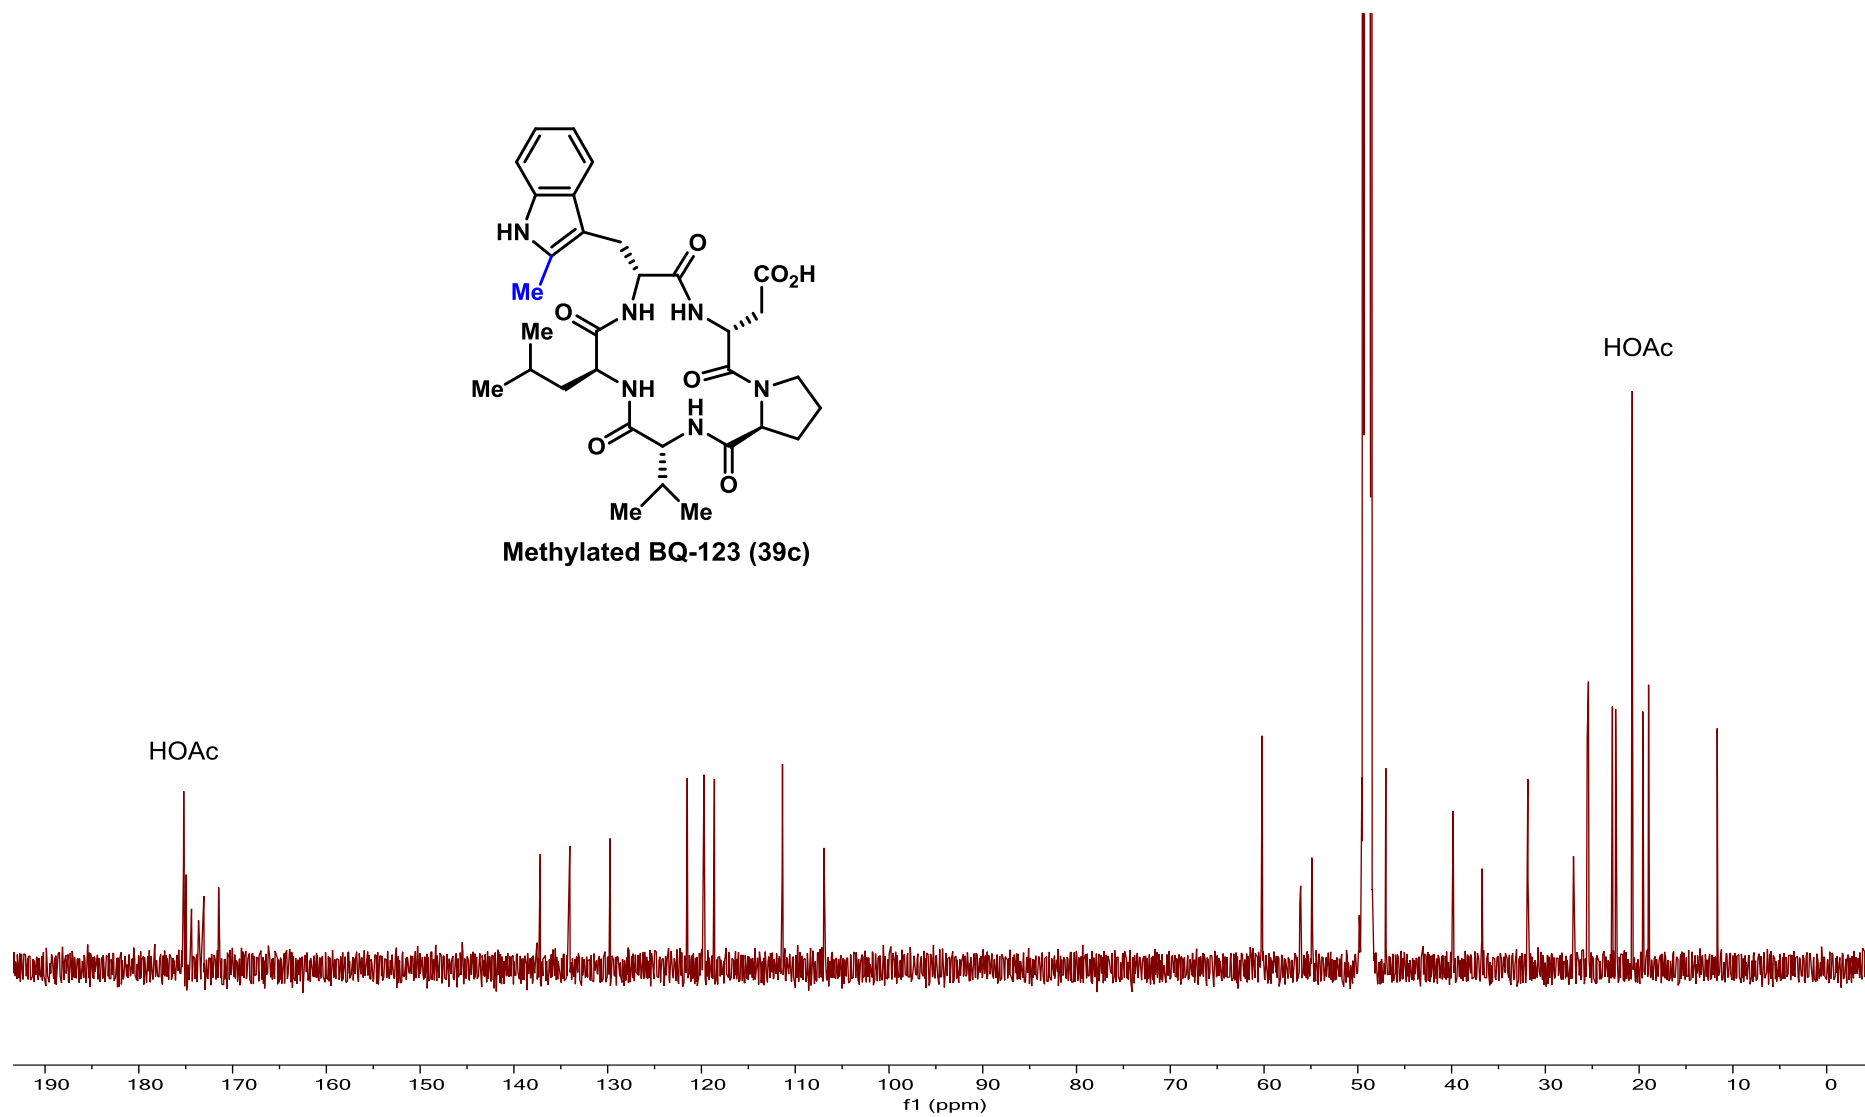

Supplement: ja5007838_si_002.pdf [file ja5007838_si_002.pdf]
