# Supplementary material
Source: PubMed Central journal article supplement (PMC3988686)
Supplement: ja5007838_si_001.pdf [file ja5007838_si_001.pdf]

# C–H Methylation of Heteroarenes Inspired by Radical SAM Methyl Transferase

Jinghan Gui<sup>†,§</sup>, Qianghui Zhou<sup>†,§</sup>, Chung-Mao Pan<sup>†</sup>, Yuki Yabe<sup>†</sup>, Aaron C. Burns<sup>‡</sup>, Michael R. Collins<sup>‡</sup>, Martha A. Ornelas<sup>‡</sup>, Yoshihiro Ishihara<sup>†</sup> and Phil S. Baran<sup>†,\*</sup>

<sup>†</sup>Department of Chemistry, The Scripps Research Institute, 10550 North Torrey Pines Road, La Jolla, California 92037

<sup>‡</sup>Department of Chemistry, Pfizer Pharmaceuticals, La Jolla Laboratories, 10770 Science Center Drive, La Jolla, California 92121

## Supporting Information

### Part 1: Experimental Procedures and Characterization Data

#### Table of Contents

|                                                                                                   |      |
|---------------------------------------------------------------------------------------------------|------|
| 1. General procedures .....                                                                       | S-2  |
| 2. Reaction condition optimization .....                                                          | S-3  |
| 3. Preparation of PSMS ( <b>6</b> ) .....                                                         | S-3  |
| 4. Typical procedure for the reaction of PSMS ( <b>6</b> ) with heterocycles.....                 | S-4  |
| 5. Photographic guide to the reaction of PSMS ( <b>6</b> ) with heterocycles .....                | S-5  |
| 6. Characterization data for compounds <b>7b</b> to <b>32b</b> .....                              | S-6  |
| 7. Characterization data for biologically relevant substrates <b>33b</b> to <b>36b</b> .....      | S-20 |
| 8. Typical procedure for the desulfonylation to reveal the methyl group.....                      | S-23 |
| 9. Characterization data for methylated products <b>7c</b> to L- <b>33c</b> .....                 | S-23 |
| 10. Experimental procedure and characterization data for compounds <b>7d</b> to <b>7g</b> .....   | S-27 |
| 11. Experimental procedure and characterization data for compounds <b>37c</b> to <b>39c</b> ..... | S-32 |
| 12. HPLC analysis of <i>N</i> -Boc-2-methyl-D/L-tryptophan methyl ester.....                      | S-35 |
| 13. X-ray crystallographic data for PSMS ( <b>6</b> ) .....                                       | S-38 |
| 14. X-ray crystallographic data for <b>18b</b> .....                                              | S-53 |

## 1. General Procedures:

Reagents were purchased at the highest commercial quality and used without further purification, unless otherwise stated. Yields refer to chromatographically and spectroscopically ( $^1\text{H}$  NMR) homogeneous material, unless otherwise stated. Reactions were monitored by thin layer chromatography (TLC) carried out on 0.25 mm E. Merck silica plates (60F-254), using UV light as the visualizing agent and  $\text{KMnO}_4$  or acidic solution of *p*-anisaldehyde and heat as a developing agent. Flash silica gel chromatography was performed using E. Merck silica gel (60, particle size 0.043–0.063 mm). NMR spectra were recorded on Bruker DRX-600, DRX-500, AMX-400, and Varian INOVA-399 instruments and were calibrated using residual undeuterated solvent as an internal reference ( $\text{CDCl}_3$  @ 7.26 ppm  $^1\text{H}$  NMR, 77.2 ppm  $^{13}\text{C}$  NMR;  $\text{CD}_3\text{OD}$  @ 3.31 ppm  $^1\text{H}$  NMR, 49.0 ppm  $^{13}\text{C}$  NMR;  $(\text{CD}_3)_2\text{CO}$  @ 2.05 ppm  $^1\text{H}$  NMR, 29.8 ppm  $^{13}\text{C}$  NMR;  $(\text{CD}_3)\text{SO}$  @ 2.50 ppm  $^1\text{H}$  NMR, 39.5 ppm  $^{13}\text{C}$  NMR). The following abbreviations were used to explain multiplicities: s = singlet, d = doublet, t = triplet, q = quartet, sept = septet, m = multiplet, br = broad. High resolution mass spectra (HRMS) were recorded on an Agilent LC/MSD TOF mass spectrometer by electrospray ionization time-of-flight reflectron experiments. IR experiments were recorded on a Perkin-Elmer Spectrum BX FTIR spectrometer. Melting points were recorded on a Fisher-Johns 12-144 melting point apparatus and were uncorrected. The UCSD small molecule X-ray facility collected and analyzed the X-ray diffraction data (for PSMS). Enantiomeric excesses (ee) were determined on a Hitachi LaChrow Elite HPLC system using HPLC chiralcel AD-H column (10% isopropanol in hexanes, 0.5 mL/min).

## 2. Reaction condition optimization:

Screening of solvents for the reaction, leading to even milder conditions than originally sought.

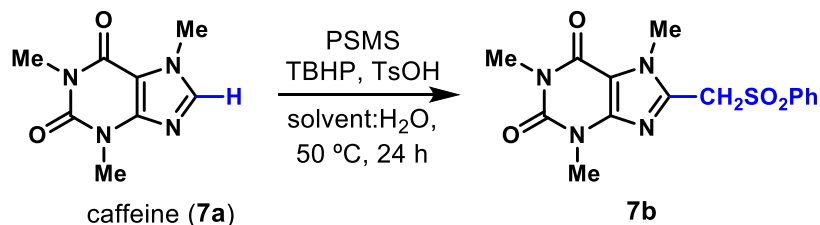

| entry | solvent                                         | <b>7a</b> : <b>7b</b> <sup>a</sup>  |
|-------|-------------------------------------------------|-------------------------------------|
| 1     | CICH <sub>2</sub> CH <sub>2</sub> Cl            | 2.3 : 1                             |
| 2     | DMSO                                            | 4.0 : 1                             |
| 3     | acetone                                         | 6.0 : 1                             |
| 4     | anisole                                         | 2.4 : 1                             |
| 5     | THF                                             | trace                               |
| 6     | EtOAc                                           | 2.6 : 1 (27%) <sup>b</sup>          |
| 7     | MeOH                                            | 5.0 : 1                             |
| 8     | C <sub>6</sub> H <sub>5</sub> CH <sub>3</sub>   | 2.5 : 1 (30%) <sup>b</sup>          |
| 9     | <b>C<sub>6</sub>H<sub>5</sub>CF<sub>3</sub></b> | <b>0.5 : 1 (32%)<sup>b,c</sup></b>  |
| 10    | C <sub>6</sub> F <sub>5</sub> CF <sub>3</sub>   | 1.9 : 1 (33%) <sup>b</sup>          |
| 11    | <b>C<sub>6</sub>H<sub>5</sub>CF<sub>3</sub></b> | <b>1.28 : 1 (43%)<sup>b,d</sup></b> |

Reaction conditions: **7a** (0.025 mmol, 1.0 equiv.), PSMS (3.0 equiv.), TBHP (5.0 equiv.), TsOH (1.0 equiv.), solvent/H<sub>2</sub>O (0.2 mL/0.08 mL), 50 °C, 24 h. <sup>a</sup>crude <sup>1</sup>H NMR ratio. <sup>b</sup>isolated yield of **7b**. <sup>c</sup>A significant amount of desulfonylation product (direct methylation product) was obtained. <sup>d</sup>Modified reaction conditions (no acid, less heat): **7a** (0.025 mmol, 1 equiv.), PSMS (1.5 equiv.), TBHP (5.0 equiv.), PhCF<sub>3</sub>/H<sub>2</sub>O (0.2 mL/0.08 mL), rt, 24 h; 43% isolated yield, 99% based on recovered starting material.

## 3. Preparation of zinc bis(phenylsulfonylmethanesulfinate) (PSMS, **6**):

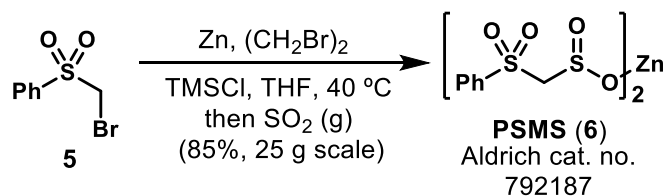

An oven-dried, argon-filled flask was charged with zinc dust (13.8 g, 0.213 mol) and THF (100 mL). This grey suspension was heated to 40 °C, and 1,2-dibromoethane (4.3 mL, 50 mmol) and a solution of TMSCl (6.7 mL, 53.0 mmol) in THF (25 mL) was added dropwise. After 30 min.

bromomethyl phenyl sulfone (25 g, 0.11 mol) was added as a solution in THF (50 mL). The temperature was maintained at 40 °C for an additional 30 min and then cooled to rt. The organozinc reagent was then transferred to a heat gun-dried, argon-filled round bottom flask and purged with SO<sub>2</sub> gas at rt for 45 min and allowed to stir for 2 h. Upon completion, the reaction mixture was extracted with water and diethyl ether. The aqueous layer was concentrated, and the obtained white solid was washed with DCM/EtOAc solution (5 L; ratio = 1:1) to afford PSMS (**6**) (25 g, 85%) as a white solid.

**Physical state:** white powder;

**Melting Point:** 120 – 122 °C;

**R<sub>f</sub>** = 0.30 (silica gel, 4:1 DCM:MeOH);

**<sup>1</sup>H NMR** (400 MHz, D<sub>2</sub>O): δ 10.42 (d, *J* = 7.4 Hz, 4H), 10.26 (t, *J* = 7.5 Hz, 2H), 10.15 (t, *J* = 8.0 Hz, 4H), 6.61 (s, 4H) ppm;

**<sup>13</sup>C NMR** (101 MHz, D<sub>2</sub>O): δ 138.1, 134.8, 129.5, 127.7, 80.2 ppm;

**IR** (neat): ν = 2921, 2852, 2360, 2336, 1302, 745 cm<sup>-1</sup>;

**HRMS** (ESI-TOF): calc'd for C<sub>7</sub>H<sub>7</sub>O<sub>4</sub>S<sub>2</sub> [PhSO<sub>2</sub>CH<sub>2</sub>SO<sub>2</sub><sup>-</sup>, M<sup>-</sup>] 218.9791, found 218.9792.

**Elem. Anal.:** C<sub>14</sub>H<sub>26</sub>O<sub>14</sub>S<sub>4</sub>Zn (PSMS·6H<sub>2</sub>O), calc'd: C, 27.48; H, 4.28; S, 20.96; found: C, 27.63; H, 4.14; S, 20.87; Br, 0.00 (demonstrating that there is no residual ZnBr<sub>2</sub>).

#### 4. Typical procedure for the reaction of PSMS (**6**) with heterocycles:

To a solution of substrate (0.2 mmol, 1 equiv.) and PSMS (**6**) (151 mg, 0.3 mmol, 1.5 equiv.) in PhCF<sub>3</sub>/H<sub>2</sub>O (1 mL/0.4 mL) was added 70% TBHP (aq.) (136 μL, 1 mmol, 5 equiv.) at 0 °C. After stirring at 0 °C for 5 min, the reaction system was warmed to room temperature and stirred at this temperature for 24 h [for substrates that were not completely consumed in 24 h, a second addition of PSMS (**6**) (151 mg, 0.3 mmol, 1.5 equiv.) and 70% TBHP (aq.) 136 μL (1 mmol, 5 equiv.) at 0 °C was performed; the reaction mixture was stirred for 5 min at 0 °C, then warmed to room temperature and stirred until the reaction was deemed to be complete (TLC or LCMS monitoring)]. Then the reaction was quenched with sat. NaHCO<sub>3</sub> solution and 5% EDTA-2Na solution, and the aqueous layer was extracted with DCM (3 times). The combined organic layers were washed with brine and dried over Na<sub>2</sub>SO<sub>4</sub>. Removal of the solvent and purification of the crude mixture by column chromatography or PTLC gave the desired product. (For reactions that do not work well in PhCF<sub>3</sub>/H<sub>2</sub>O, DMSO/H<sub>2</sub>O or H<sub>2</sub>O could be used as solvent.)

## 5. Photographic guide to the reaction of PSMS (6) with heterocycles:

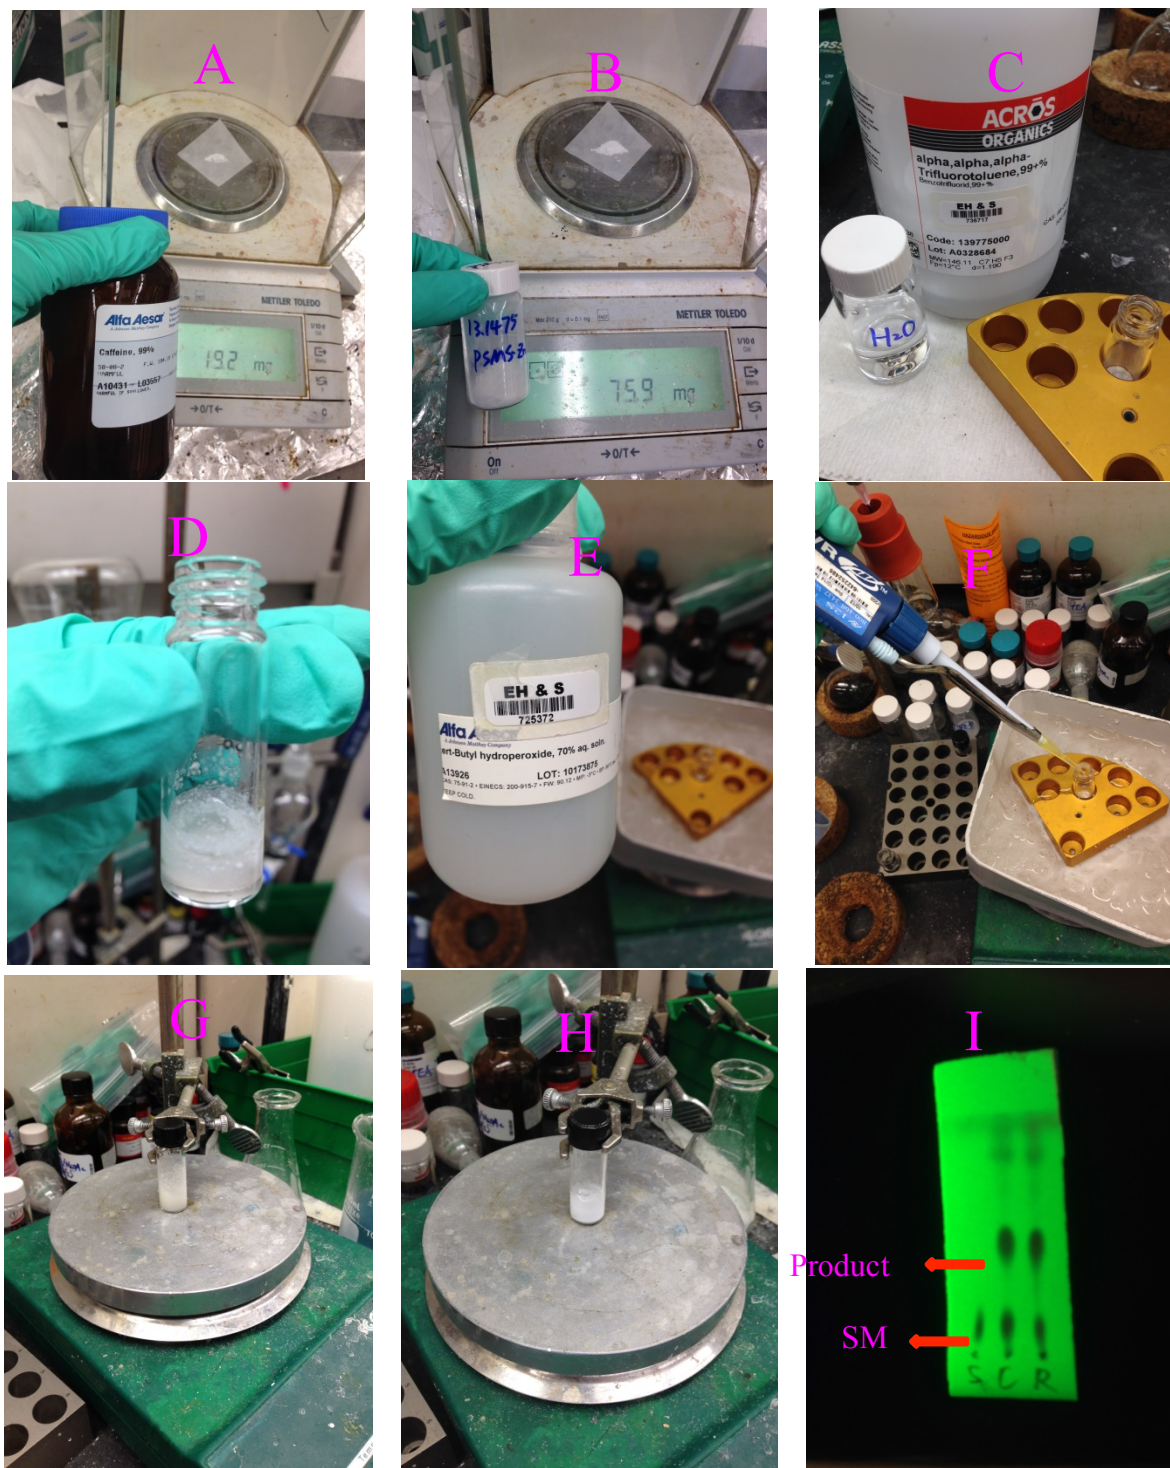

**Figure S1.** A. Weighing substrate (caffeine, 1 equiv.); B. Weighing PSMS (1.5 equiv.); C and D: Addition of solvent ( $\text{PhCF}_3/\text{H}_2\text{O}$ , 2.5/1); E and F. Addition of 70% TBHP (aq.) (5 equiv.) at 0 °C; G. Warmed to room temperature after 5 min; H and I: reaction system after 24 h and the TLC plate visualized under short-wave UV light.

## 6. Characterization data for compounds 7b to 32b:

### 1,3,7-Trimethyl-8-((phenylsulfonyl)methyl)-3,7-dihydro-1H-purine-2,6-dione

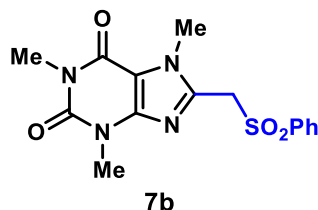

**Physical state:** white powder;

**Melting point:** 243 – 245 °C (decomposed);

$R_f$  = 0.60 (silica gel, 20:1 EtOAc:MeOH);

$^1\text{H NMR}$  (400 MHz,  $\text{CDCl}_3$ ):  $\delta$  7.76 (d,  $J$  = 7.8 Hz, 2H), 7.70 (t,  $J$  = 7.3 Hz, 1H), 7.55 (t,  $J$  = 7.8 Hz, 2H), 4.56 (s, 2H), 4.06 (s, 3H), 3.40 (s, 3H), 3.36 (s, 3H) ppm;

$^{13}\text{C NMR}$  (151 MHz,  $\text{CDCl}_3$ ):  $\delta$  155.4, 151.5, 147.7, 141.2, 137.9, 134.7, 129.4, 128.7, 109.1, 54.7, 33.0, 29.7, 28.2 ppm;

**IR** (neat):  $\nu$  = 2360, 2340, 1702, 1657, 1152, 980, 751  $\text{cm}^{-1}$ ;

**HRMS** (ESI-TOF): calc'd for  $\text{C}_{15}\text{H}_{17}\text{N}_4\text{O}_4\text{S}$  [ $\text{M}+\text{H}^+$ ] 349.0965, found 349.0968.

### 3,7-Dimethyl-1-(5-oxohexyl)-8-((phenylsulfonyl)methyl)-3,7-dihydro-1H-purine-2,6-dione

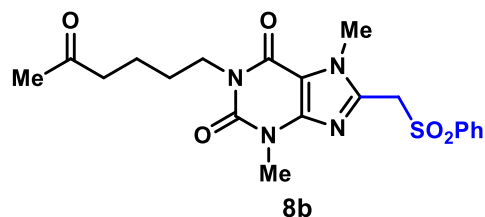

**Physical state:** white solid;

**Melting point:** 150–152 °C;

$R_f$  = 0.50 (silica gel, 20:1 EtOAc:MeOH);

$^1\text{H NMR}$  (400 MHz,  $\text{CDCl}_3$ ):  $\delta$  7.77 (dd,  $J$  = 8.4, 1.3 Hz, 2H), 7.70 (ddt,  $J$  = 8.6, 7.1, 1.3 Hz, 1H), 7.55 (dd,  $J$  = 8.2, 7.4 Hz, 2H), 4.55 (s, 2H), 4.04 (s, 3H), 3.99 (t,  $J$  = 6.8 Hz, 2H), 3.34 (s, 3H), 2.49 (t,  $J$  = 6.8 Hz, 2H), 2.14 (s, 3H), 1.65 (tt,  $J$  = 8.8, 6.0 Hz, 4H) ppm;

$^{13}\text{C NMR}$  (151 MHz,  $\text{CDCl}_3$ ):  $\delta$  209.0, 155.1, 151.2, 147.6, 141.2, 137.7, 134.7, 129.4, 128.7, 109.0, 54.6, 43.3, 41.0, 32.9, 30.2, 29.6, 27.4, 21.0 ppm;

**IR** (neat):  $\nu$  = 2360, 2339, 1700, 1655, 1321, 1151  $\text{cm}^{-1}$ ;

**HRMS** (ESI-TOF): calc'd for C<sub>20</sub>H<sub>25</sub>N<sub>4</sub>O<sub>5</sub>S [M+H<sup>+</sup>] 433.1540, found 433.1542.

**1,3-Dimethyl-8-((phenylsulfonyl)methyl)-3,7-dihydro-1H-purine-2,6-dione**

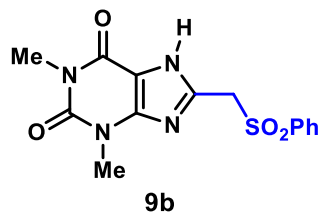

**Physical state:** white powder;

**Melting point:** 260 – 262 °C (decomposed);

*R<sub>f</sub>* = 0.70 (silica gel, 10:1 EtOAc:MeOH);

**<sup>1</sup>H NMR** (600 MHz, CDCl<sub>3</sub>): δ 7.76 (d, *J* = 7.8 Hz, 2H), 7.63 (t, *J* = 7.4 Hz, 1H), 7.51 (t, *J* = 7.6 Hz, 2H), 4.65 (s, 2H), 3.49 (s, 6H) ppm;

**<sup>13</sup>C NMR** (151 MHz, CDCl<sub>3</sub>): δ 156.2, 151.3, 149.0, 142.0, 138.0, 134.5, 129.4, 128.6, 108.4, 56.5, 30.4, 28.7 ppm;

**IR** (neat): ν = 2360, 1700, 1647, 1153, 762 cm<sup>-1</sup>;

**HRMS** (ESI-TOF): calc'd for C<sub>14</sub>H<sub>15</sub>N<sub>4</sub>O<sub>4</sub>S [M+H<sup>+</sup>] 335.0809, found 335.0809.

**1-(1-Methyl-2-((phenylsulfonyl)methyl)-1H-pyrrol-3-yl)ethan-1-one**

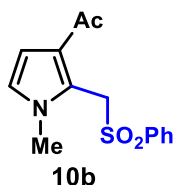

**Physical state:** light yellow solid;

**Melting point:** 150 – 152 °C;

*R<sub>f</sub>* = 0.70 (silica gel, 1:1 EtOAc:hexanes);

**<sup>1</sup>H NMR** (600 MHz, CDCl<sub>3</sub>): δ 7.64 (d, *J* = 7.5 Hz, 2H), 7.57 (t, *J* = 7.4 Hz, 1H), 7.42 (t, *J* = 7.8 Hz, 2H), 6.64 (d, *J* = 3.0 Hz, 1H), 6.38 (d, *J* = 3.0 Hz, 1H), 5.02 (s, 2H), 3.81 (s, 3H), 2.02 (s, 3H) ppm;

**<sup>13</sup>C NMR** (151 MHz, CDCl<sub>3</sub>): δ 194.0, 137.8, 133.7, 129.1, 128.6, 124.3, 124.0, 123.6, 110.5, 52.5, 34.9, 27.8 ppm;

**IR** (neat): ν = 2923, 2360, 2339, 1654, 1149, 778 cm<sup>-1</sup>;

**HRMS** (ESI-TOF): calc'd for C<sub>14</sub>H<sub>16</sub>NO<sub>3</sub>S [M+H<sup>+</sup>] 278.0845, found 278.0837.

**Ethyl 5-((phenylsulfonyl)methyl)-1H-pyrrole-2-carboxylate**

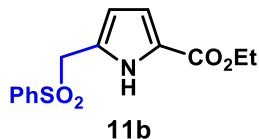

**Physical state:** white solid;

**Melting point:** 105 – 107 °C;

*R<sub>f</sub>* = 0.35 (silica gel, 1:2 EtOAc:hexanes);

**<sup>1</sup>H NMR** (600 MHz, CDCl<sub>3</sub>): δ 9.59 (s, 1H), 7.66 (d, *J* = 7.7 Hz, 2H), 7.62 (t, *J* = 7.5 Hz, 1H), 7.48 (t, *J* = 7.7 Hz, 2H), 6.75 (s, 1H), 5.86 (s, 1H), 4.38 (s, 2H), 4.33 (q, *J* = 7.1 Hz, 2H), 1.37 (t, *J* = 7.1 Hz, 3H) ppm;

**<sup>13</sup>C NMR** (151 MHz, CDCl<sub>3</sub>): δ 160.9, 137.6, 134.3, 129.3, 128.6, 124.9, 123.1, 115.6, 113.2, 60.8, 55.8, 14.6 ppm;

**IR** (neat): ν = 2924, 2360, 2339, 1698, 1306, 1149, 746 cm<sup>-1</sup>;

**HRMS** (ESI-TOF): calc'd for C<sub>14</sub>H<sub>16</sub>NO<sub>4</sub>S [M+H<sup>+</sup>] 294.0795, found 294.0793.

**2,2,2-Trifluoro-1-(5-((phenylsulfonyl)methyl)-1H-pyrrol-2-yl)ethan-1-one**

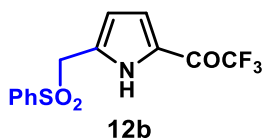

**Physical state:** white solid;

**Melting point:** 140 – 142 °C;

*R<sub>f</sub>* = 0.45 (silica gel, 1:2 EtOAc:hexanes);

**<sup>1</sup>H NMR** (600 MHz, CDCl<sub>3</sub>): δ 10.21 (s, 1H), 7.79 – 7.69 (m, 2H), 7.66 (t, *J* = 7.5 Hz, 1H), 7.52 (t, *J* = 7.8 Hz, 2H), 7.08 (dd, *J* = 4.1, 2.2 Hz, 1H), 6.10 (dd, *J* = 4.2, 2.4 Hz, 1H), 4.48 (s, 2H) ppm;

**<sup>13</sup>C NMR** (151 MHz, CDCl<sub>3</sub>): δ 170.4 (q, *J<sub>CF</sub>* = 36.8 Hz), 137.5, 134.6, 130.0, 129.5, 128.5, 127.1, 121.8 (q, *J<sub>CF</sub>* = 3.5 Hz), 116.9 (q, *J<sub>CF</sub>* = 288.9 Hz), 114.0, 55.5 ppm;

**<sup>19</sup>F NMR** (376 MHz, CDCl<sub>3</sub>): δ -72.8 ppm;

**IR** (neat): ν = 3309, 2360, 2339, 1670, 1083, 729 cm<sup>-1</sup>;



**HRMS** (ESI-TOF): calc'd for C<sub>13</sub>H<sub>11</sub>NO<sub>3</sub> F<sub>3</sub>S [M+H<sup>+</sup>] 318.0406, found 318.0406.

**Ethyl 4-methyl-2-((phenylsulfonyl)methyl)-1H-pyrrole-3-carboxylate**

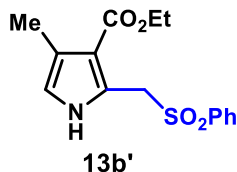

**Physical state:** brown solid;

**Melting point:** 104 – 107 °C;

*R<sub>f</sub>* = 0.33 (silica gel, 2:3 EtOAc:hexanes);

**<sup>1</sup>H NMR** (400 MHz, CDCl<sub>3</sub>): δ 9.00 (s, 1H), 7.66 – 7.53 (m, 3H), 7.50 – 7.35 (m, 2H), 6.59 (s, 1H), 4.92 (s, 2H), 3.98 (q, *J* = 7.1 Hz, 2H), 2.14 (s, 3H), 1.18 (t, *J* = 7.1 Hz, 3H) ppm;

**<sup>13</sup>C NMR** (151 MHz, CDCl<sub>3</sub>): δ 164.9, 137.7, 133.9, 128.9, 128.4, 124.0, 122.0, 118.4, 114.5, 59.5, 54.1, 14.4, 12.6 ppm;

**IR** (neat): ν = 2922, 2853, 2359, 2339, 1687, 1119, 722 cm<sup>-1</sup>;

**HRMS** (ESI-TOF): calc'd for C<sub>15</sub>H<sub>18</sub>NO<sub>4</sub>S [M+H<sup>+</sup>] 308.0951, found 308.0953.

**Ethyl 4-methyl-5-((phenylsulfonyl)methyl)-1H-pyrrole-3-carboxylate**

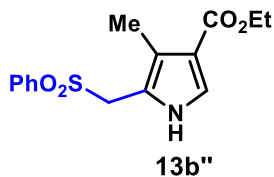

**Physical state:** brown oil;

*R<sub>f</sub>* = 0.25 (silica gel, 2:3 EtOAc:hexanes);

**<sup>1</sup>H NMR** (500 MHz, CDCl<sub>3</sub>): δ 8.76 (s, 1H), 7.62 (t, *J* = 7.4 Hz, 1H), 7.58 (d, *J* = 7.6 Hz, 2H), 7.47 (t, *J* = 7.8 Hz, 2H), 7.44 (d, *J* = 3.2 Hz, 1H), 4.28 (s, 2H), 4.23 (q, *J* = 7.1 Hz, 2H), 1.65 (s, 3H), 1.31 (t, *J* = 7.1 Hz, 3H) ppm;

**<sup>13</sup>C NMR** (151 MHz, CDCl<sub>3</sub>): δ 165.0, 137.2, 134.3, 129.3, 128.4, 125.5, 122.4, 116.4, 115.4, 59.6, 53.6, 14.6, 9.4 ppm;

**IR** (neat): ν = 3339, 2922, 2854, 1685, 1068, 686 cm<sup>-1</sup>;

**HRMS** (ESI-TOF): calc'd for C<sub>15</sub>H<sub>18</sub>NO<sub>4</sub>S [M+H<sup>+</sup>] 308.0951, found 308.0951.

## 2-Methyl-4-nitro-5-((phenylsulfonyl)methyl)-1H-imidazole

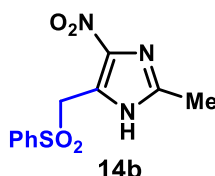

**Physical state:** yellow solid;

**Melting point:** 173 – 175 °C;

$R_f$  = 0.50 (silica gel, 20:1 EtOAc:MeOH);

$^1\text{H NMR}$  (600 MHz, DMSO- $d_6$ ):  $\delta$  7.74 (t,  $J$  = 7.3 Hz, 1H), 7.66 (d,  $J$  = 7.6 Hz, 2H), 7.59 (t,  $J$  = 7.7 Hz, 2H), 4.98 (s, 2H), 2.32 (s, 3H);

$^{13}\text{C NMR}$  (151 MHz, DMSO- $d_6$ ):  $\delta$  144.6, 144.3, 137.7, 134.5, 129.5, 127.9, 120.0, 52.5, 13.8 ppm;

**IR** (neat):  $\nu$  = 2922, 2359, 2339, 1540, 1141, 668  $\text{cm}^{-1}$ ;

**HRMS** (ESI-TOF): calc'd for  $\text{C}_{11}\text{H}_{12}\text{N}_3\text{O}_4\text{S}$  [ $\text{M}+\text{H}^+$ ] 282.0543, found 282.0551.

## Methyl 1-methyl-5-((phenylsulfonyl)methyl)-1H-imidazole-4-carboxylate

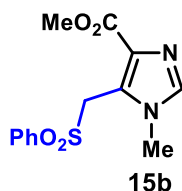

**Physical state:** colorless oil;

$R_f$  = 0.45 (silica gel, 20:1 EtOAc:MeOH);

$^1\text{H NMR}$  (400 MHz,  $\text{CDCl}_3$ ):  $\delta$  7.69 – 7.60 (m, 3H), 7.57 (s, 1H), 7.52 – 7.44 (m, 2H), 4.90 (s, 2H), 3.89 (s, 3H), 3.52 (s, 3H);

$^{13}\text{C NMR}$  (151 MHz,  $\text{CDCl}_3$ ):  $\delta$  162.4, 139.7, 137.2, 134.2, 132.5, 129.0, 129.0, 126.3, 51.6, 51.5, 33.0 ppm;

**IR** (neat):  $\nu$  = 2923, 2360, 2338, 1712, 1127, 689  $\text{cm}^{-1}$ ;

**HRMS** (ESI-TOF): calc'd for  $\text{C}_{13}\text{H}_{15}\text{N}_2\text{O}_4\text{S}$  [ $\text{M}+\text{H}^+$ ] 295.0747, found 295.0756.

## 4-Methyl-2-phenyl-5-((phenylsulfonyl)methyl)-1H-imidazole

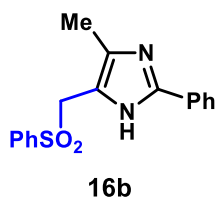

**Physical state:** colorless oil;

$R_f$  = 0.60 (silica gel, 20:1 EtOAc:MeOH);

$^1\text{H NMR}$  (400 MHz, DMSO- $d_6$ ):  $\delta$  7.88 – 7.70 (m, 5H), 7.59 (m, 2H), 7.39 (m, 2H), 7.29 (m,  $J$  = 7.3 Hz, 1H), 4.51 (s, 2H), 1.96 (s, 3H) ppm;

$^{13}\text{C NMR}$  (151 MHz, DMSO- $d_6$ ):  $\delta$  143.9, 139.1, 133.5, 130.5, 129.0, 128.6, 128.5, 128.2, 127.8, 125.6, 124.4, 54.9, 9.0 ppm;

**IR** (neat):  $\nu$  = 2360, 2337, 1447, 1303, 1141, 1082, 773, 687, 551, 526  $\text{cm}^{-1}$ ;

**HRMS** (ESI-TOF): calc'd for  $\text{C}_{17}\text{H}_{17}\text{N}_2\text{O}_2\text{S}$  [ $\text{M}+\text{H}^+$ ] 313.1005, found 313.1006.

#### Methyl 2,6-dihydroxy-5-((phenylsulfonyl)methyl)pyrimidine-4-carboxylate

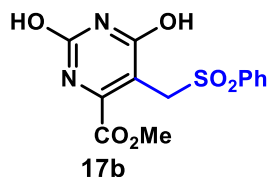

To a solution of methyl 2,6-dihydroxypyrimidine-4-carboxylate (85 mg, 0.5 mmol) and PSMS (378 mg, 0.75 mmol) in DMSO:H<sub>2</sub>O (2:1, 3 mL) at room temperature was added 70% TBHP (aq.) (415  $\mu\text{L}$ , 3 mmol) portionwise. The reaction was stirred at room temperature for 16 h. The LC-MS showed complete conversion. The reaction was diluted with water and the obtained solid was filtered. The resulting cake was dried in a vacuum oven for 16 h. The cake was triturated in acetone, filtered and the remaining solids washed with acetone and discarded. The filtrate was evaporated to give the product as a white solid (83 mg, 51%).

**Physical state:** white powder;

**Melting point:** 250 – 252  $^{\circ}\text{C}$ ;

$R_f$  = 0.37 (silica gel, EtOAc);

$^1\text{H NMR}$  (400 MHz, DMSO- $d_6$ ):  $\delta$  11.54 (s, 1H), 11.34 (s, 1H), 7.81 – 7.68 (m, 3H), 7.68 – 7.33 (m, 2H), 4.56 (s, 2H), 3.79 (s, 3H) ppm;

$^{13}\text{C}$  NMR (151 MHz, DMSO- $d_6$ ):  $\delta$  162.8, 161.2, 149.5, 142.0, 138.5, 134.0, 129.3, 128.0, 102.3, 53.3, 50.4 ppm;

IR (neat):  $\nu$  = 3729, 2360, 2339, 1679, 1299, 670  $\text{cm}^{-1}$ ;

HRMS (ESI-TOF): calc'd for  $\text{C}_{13}\text{H}_{13}\text{N}_2\text{O}_6\text{S}$  [ $\text{M}+\text{H}^+$ ] 325.0489, found 325.0487.

#### 4-((Phenylsulfonyl)methyl)pyridazin-3-amine

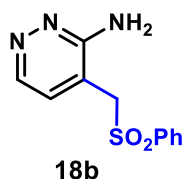

To a vial charged with 3-aminopyridazine (25 mg, 0.26 mmol, 1.0 equiv.) were added DMSO (500  $\mu\text{L}$ ), TFA (20  $\mu\text{L}$ , 0.26 mmol, 1.0 equiv.), and 70% TBHP (aq.) (180  $\mu\text{L}$ , 1.3 mmol, 5.0 equiv.). The vial was placed in a pre-heated sandbath (50  $^{\circ}\text{C}$ ) and a solution of PSMS (**6**) (197 mg, 0.39 mmol, 1.5 equiv., in 500  $\mu\text{L}$  DMSO, warmed gently with a heat gun to solubilize) was added portionwise in four 30 min intervals (ca. 150  $\mu\text{L}$  each). After the last addition of PSMS, the reaction mixture was allowed to stir for an additional 18 h at 50  $^{\circ}\text{C}$ , cooled to room temperature, quenched with sat. aq.  $\text{NaHCO}_3$  (ca. 10 mL), and filtered. The resultant aqueous phase was extracted with EtOAc (5 x 25 mL) and dried over anhydrous  $\text{Na}_2\text{SO}_4$ . Concentration provided the crude material, which was purified using a Biotage 25g HP column (5% EtOH in EtOAc) to afford 27 mg (41% yield) of 4-((phenylsulfonyl)methyl)pyridazin-3-amine **18b** as an off-white amorphous solid. The material contains ~10% (by NMR integration) of an isomeric compound.

**Physical state:** off-white amorphous solid;

**Melting point:** 110 – 113  $^{\circ}\text{C}$ ;

$R_f$  = 0.20 (silica gel, 19:1 EtOAc:EtOH);

$^1\text{H}$  NMR (600 MHz, DMSO- $d_6$ ):  $\delta$  8.37 (d,  $J$  = 4.6 Hz, 1 H), 7.80 (d,  $J$  = 7.3, 2 H), 7.75 (t,  $J$  = 7.4 Hz, 1 H), 7.62 (t,  $J$  = 7.9 Hz, 2 H), 6.98 (d,  $J$  = 4.8 Hz, 1 H), 6.38 (s, 2 H), 4.71 (s, 2H) ppm;

$^{13}\text{C}$  NMR (151 MHz, DMSO- $d_6$ )  $\delta$  159.9, 142.4, 138.3, 134.2, 129.7, 129.2, 128.2, 112.7, 55.0 ppm;

IR (neat):  $\nu$  = 3732, 2360, 2339, 1148, 684  $\text{cm}^{-1}$ ;

HRMS (ESI-TOF) calc'd for  $\text{C}_{11}\text{H}_{12}\text{N}_3\text{O}_2\text{S}$  [ $\text{M}+\text{H}^+$ ] 250.0645, found 250.0646.

### 3-((Phenylsulfonyl)methyl)quinoxalin-2-ol

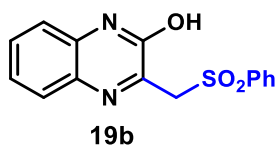

**Physical state:** white solid;

**Melting point:** 150 – 152 °C;

$R_f$  = 0.60 (silica gel, 1:1 EtOAc:DCM);

**$^1\text{H}$  NMR** (500 MHz,  $\text{CDCl}_3$ ):  $\delta$  7.89 (d,  $J$  = 7.3 Hz, 2H), 7.75 (d,  $J$  = 8.1 Hz, 1H), 7.62 (t,  $J$  = 7.4 Hz, 1H), 7.58 (t,  $J$  = 7.1 Hz, 1H), 7.51 (t,  $J$  = 7.7 Hz, 2H), 7.36 (t,  $J$  = 7.7 Hz, 1H), 7.27 (d,  $J$  = 8.0 Hz, 1H), 4.86 (s, 2H) ppm;

**$^{13}\text{C}$  NMR** (151 MHz,  $\text{DMSO}-d_6$ ):  $\delta$  154.1, 150.4, 139.4, 134.0, 132.2, 131.5, 131.3, 129.3, 128.7, 128.2, 123.7, 115.6, 57.5 ppm;

**IR** (neat):  $\nu$  = 2922, 2852, 2360, 2339, 1668, 1149, 687  $\text{cm}^{-1}$ ;

**HRMS** (ESI-TOF): calc'd for  $\text{C}_{15}\text{H}_{13}\text{N}_2\text{O}_3\text{S}$  [ $\text{M}+\text{H}^+$ ] 301.0641, found 301.0643.

### 2-(2-((Phenylsulfonyl)methyl)-1H-indol-3-yl)ethan-1-ol

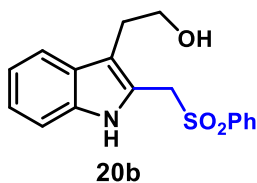

**Physical state:** light yellow oil;

$R_f$  = 0.42 (silica gel, 1:1 EtOAc:hexanes);

**$^1\text{H}$  NMR** (600 MHz,  $\text{CDCl}_3$ ):  $\delta$  8.80 (br s, 1H), 7.73 (d,  $J$  = 7.5 Hz, 2H), 7.63 (t,  $J$  = 7.5 Hz, 1H), 7.50 (d,  $J$  = 7.9 Hz, 1H), 7.47 (t,  $J$  = 7.8 Hz, 2H), 7.38 (d,  $J$  = 8.2 Hz, 1H), 7.24 (t,  $J$  = 7.6 Hz, 1H), 7.12 (t,  $J$  = 7.4 Hz, 1H), 4.57 (s, 2H), 3.57 (t,  $J$  = 6.2 Hz, 2H), 2.61 (t,  $J$  = 6.2 Hz, 2H) ppm;

**$^{13}\text{C}$  NMR** (151 MHz,  $\text{CDCl}_3$ ):  $\delta$  137.9, 136.7, 134.3, 129.4, 128.4, 127.5, 123.4, 122.2, 119.9, 119.0, 114.4, 111.5, 62.4, 54.3, 27.4 ppm;

**IR** (neat):  $\nu$  = 3379, 2924, 2360, 2339, 1447, 1303, 1146, 738  $\text{cm}^{-1}$ ;

**HRMS** (ESI-TOF): calc'd for  $\text{C}_{17}\text{H}_{18}\text{NO}_3\text{S}$  [ $\text{M}+\text{H}^+$ ] 316.1002, found 316.0994.

### Methyl 2-((phenylsulfonyl)methyl)-1*H*-indol-3-yl)acetate

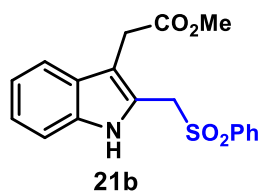

**Physical state:** light yellow solid;

**Melting point:** 134 – 136 °C;

$R_f$  = 0.40 (silica gel, 1:2 EtOAc:hexanes);

$^1\text{H NMR}$  (500 MHz,  $\text{CDCl}_3$ ):  $\delta$  8.75 (s, 1H), 7.66 (d,  $J$  = 7.9 Hz, 2H), 7.61 (t,  $J$  = 7.5 Hz, 1H), 7.50 (d,  $J$  = 7.9 Hz, 1H), 7.44 (t,  $J$  = 7.8 Hz, 2H), 7.36 (d,  $J$  = 8.2 Hz, 1H), 7.23 (t,  $J$  = 7.6 Hz, 1H), 7.13 (t,  $J$  = 7.5 Hz, 1H), 4.60 (s, 2H), 3.54 (s, 3H), 3.21 (s, 2H) ppm;

$^{13}\text{C NMR}$  (151 MHz,  $\text{CDCl}_3$ ):  $\delta$  171.5, 137.7, 136.3, 134.2, 129.3, 128.4, 127.3, 123.4, 122.8, 120.3, 119.1, 111.4, 110.1, 54.3, 52.2, 29.4 ppm;

**IR** (neat):  $\nu$  = 3360, 2922, 2852, 2360, 2339, 1728, 1306, 1147, 742  $\text{cm}^{-1}$ ;

**HRMS** (ESI-TOF): calc'd for  $\text{C}_{18}\text{H}_{18}\text{NO}_4\text{S}$  [ $\text{M}+\text{H}^+$ ] 344.0951, found 344.0956.

### Methyl 3-((phenylsulfonyl)methyl)-1*H*-indole-2-carboxylate

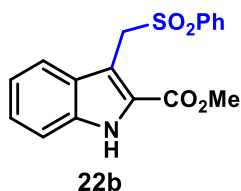

**Physical state:** white solid;

**Melting point:** 177 – 179 °C;

$R_f$  = 0.28 (silica gel, 1:2 EtOAc:hexanes);

$^1\text{H NMR}$  (400 MHz,  $\text{CDCl}_3$ ):  $\delta$  9.01 (s, 1H), 7.70 (d,  $J$  = 8.2 Hz, 1H), 7.64 (d,  $J$  = 8.2 Hz, 2H), 7.56 (t,  $J$  = 7.5 Hz, 1H), 7.46 – 7.31 (m, 4H), 7.18 (t,  $J$  = 7.4 Hz, 1H), 5.02 (s, 2H), 3.65 (s, 3H) ppm;

$^{13}\text{C NMR}$  (151 MHz,  $\text{CDCl}_3$ ):  $\delta$  161.4, 138.4, 135.6, 133.6, 128.8, 128.7, 127.7, 126.3, 125.5, 121.7, 121.6, 112.0, 109.7, 53.6, 52.0 ppm;

**IR** (neat):  $\nu$  = 3336, 2923, 2360, 2337, 1709, 1149, 791  $\text{cm}^{-1}$ ;

**HRMS** (ESI-TOF): calc'd for  $\text{C}_{17}\text{H}_{16}\text{NO}_4\text{S}$  [ $\text{M}+\text{H}^+$ ] 330.0795, found 330.0793.

## 2-Methyl-3-((phenylsulfonyl)methyl)-1H-indole

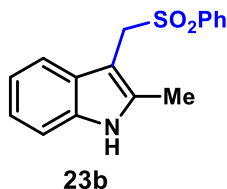

**Physical state:** yellow solid;

**Melting point:** 173 – 175 °C;

$R_f$  = 0.28 (silica gel, 1:2 EtOAc:hexanes);

**$^1\text{H}$  NMR** (400 MHz,  $\text{CDCl}_3$ ):  $\delta$  7.97 (s, 1H), 7.64 (d,  $J$  = 8.0 Hz, 2H), 7.54 (t,  $J$  = 7.5 Hz, 1H), 7.37 (t,  $J$  = 7.7 Hz, 2H), 7.23 (d,  $J$  = 8.1 Hz, 1H), 7.14 (d,  $J$  = 7.9 Hz, 1H), 7.08 (t,  $J$  = 7.6 Hz, 1H), 6.96 (t,  $J$  = 7.5 Hz, 1H), 4.48 (s, 2H), 2.12 (s, 3H) ppm;

**$^{13}\text{C}$  NMR** (151 MHz,  $\text{CDCl}_3$ ):  $\delta$  138.4, 136.0, 134.9, 133.6, 129.0, 128.8, 128.2, 121.8, 120.3, 118.0, 110.4, 99.3, 54.0, 11.6 ppm;

**IR** (neat):  $\nu$  = 2923, 2361, 2339, 1134, 740  $\text{cm}^{-1}$ ;

**HRMS** (ESI-TOF): calc'd for  $\text{C}_{16}\text{H}_{16}\text{NO}_2\text{S}$  [ $\text{M}+\text{H}^+$ ] 286.0896, found 286.0901.

## 3-Bromo-2-((phenylsulfonyl)methyl)-1H-pyrrolo[2,3-*b*]pyridine

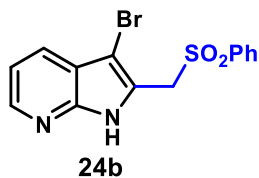

To a solution of 3-bromo-1H-pyrrolo[2,3-*b*]pyridine (90 mg, 0.46 mmol, 1.0 equiv.) and PSMS (345 mg, 0.685 mmol) in DMSO/ $\text{H}_2\text{O}$  (2:1, 3 mL) at room temperature, 70% TBHP (aq.) (327  $\mu\text{L}$ , 2.28 mmol, 5 equiv.) was added portionwise. The reaction was stirred at room temperature for 16 h. By LC-MS, 60% conversion was observed. Another portion of PSMS (**6**) (345 mg, 0.685 mmol, 1.5 equiv.) in DMSO: $\text{H}_2\text{O}$  (2:1, 3 mL) and 70% TBHP (aq.) (327  $\mu\text{L}$ , 2.28 mmol, 5 equiv.) were added. The reaction was stirred at room temperature for 2 h. The LC-MS showed that most of the starting material was consumed. The reaction was diluted with water and the solids obtained were filtered. The resulting cake was washed with acetone and the insoluble

solids were discarded. The filtrate was evaporated to give the product in ~ 95 % purity. The aqueous layer was saturated with sodium chloride and extracted with ethyl acetate (3 x 20 mL). The organic layers were combined and washed with water (3 x 20 mL), dried over Na<sub>2</sub>SO<sub>4</sub> and evaporated to give a second batch of product. The combined batches were dissolved in DCM/MeOH and silica gel was added to the solution. The suspension was filtered through a silica plug and washed with dichloromethane/methanol (20%, v/v). The solvent was removed to give the product as a yellow solid, which was recrystallized in acetone/water to give product **24b** (63 mg, 39 %).

**Physical state:** yellow solid;

**Melting point:** 210 °C (decomposed);

*R<sub>f</sub>* = 0.62 (silica gel, EtOAc);

**<sup>1</sup>H NMR** (400 MHz, DMSO-*d*<sub>6</sub>): δ 12.32 (br s, 1H), 8.37 (d, *J* = 3.6 Hz, 1H), 7.93 – 7.70 (m, 4H), 7.70 – 7.51 (m, 2H), 7.22 (dd, *J* = 4.6, 7.6 Hz, 1H), 4.82 (s, 2H) ppm;

**<sup>13</sup>C NMR** (101 MHz, DMSO-*d*<sub>6</sub>): δ 147.1, 144.8, 138.1, 134.2, 129.4, 128.1, 126.8, 125.0, 118.8, 116.7, 90.9, 54.1 ppm;

**IR** (neat): ν = 3732, 3704, 2360, 2339, 1307, 685 cm<sup>-1</sup>;

**HRMS** (ESI-TOF): calc'd for C<sub>14</sub>H<sub>12</sub>N<sub>2</sub>O<sub>2</sub>SBr [M+H<sup>+</sup>] 350.9797, found 350.9789.

### 5-Methoxy-4-((phenylsulfonyl)methyl)-1*H*-benzo[*d*]imidazole

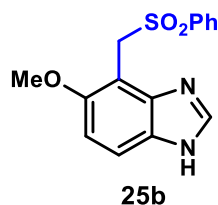

**Physical state:** white solid;

**Melting point:** 182 – 184 °C;

*R<sub>f</sub>* = 0.60 (silica gel, 10:1 DCM:MeOH);

**<sup>1</sup>H NMR** (600 MHz, CDCl<sub>3</sub>): δ 8.05 (s, 1H), 7.72 – 7.63 (m, 1H), 7.58 (d, *J* = 7.7 Hz, 2H), 7.55 (t, *J* = 7.5 Hz, 1H), 7.38 (t, *J* = 7.6 Hz, 2H), 6.68 (d, *J* = 8.6 Hz, 1H), 4.80 (s, 2H), 3.40 (s, 3H);

**<sup>13</sup>C NMR** (151 MHz, DMSO-*d*<sub>6</sub>): δ 153.5, 142.0, 139.0, 137.7, 134.8, 133.7, 128.8, 128.2, 120.0, 106.2, 99.4, 55.7, 53.1 ppm;

**IR** (neat): ν = 2924, 2849, 2360, 2339, 1303, 1137, 740 cm<sup>-1</sup>;



**HRMS** (ESI-TOF): calc'd for C<sub>15</sub>H<sub>15</sub>N<sub>2</sub>O<sub>3</sub>S [M+H<sup>+</sup>] 303.0798, found 303.0795.

**2-Methyl-7-((phenylsulfonyl)methyl)benzo[*d*]thiazol-6-ol**

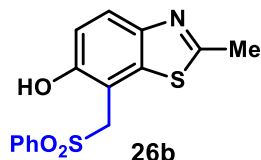

**Physical state:** colorless oil;

**R<sub>f</sub>** = 0.30 (silica gel, 2:1 EtOAc:hexanes);

**<sup>1</sup>H NMR** (600 MHz, acetone-*d*<sub>6</sub>) δ 8.76 (s, 1H), 7.68 (m, 4H), 7.51 (t, *J* = 7.5 Hz, 2H), 6.92 (d, *J* = 8.7 Hz, 1H), 4.69 (s, 2H), 2.72 (s, 3H);

**<sup>13</sup>C NMR** (151 MHz, acetone-*d*<sub>6</sub>): δ 164.5, 154.4, 148.4, 140.5, 140.3, 134.5, 129.7, 129.4, 124.1, 115.6, 109.0, 58.0, 19.7 ppm;

**IR** (neat): ν = 2921, 2854, 1447, 1135, 728 cm<sup>-1</sup>;

**HRMS** (ESI-TOF): calc'd for C<sub>15</sub>H<sub>14</sub>NO<sub>3</sub>S<sub>2</sub> [M+H<sup>+</sup>] 320.0410, found 320.0412.

**2-Methyl-4-((phenylsulfonyl)methyl)benzo[*d*]thiazol-5-ol**

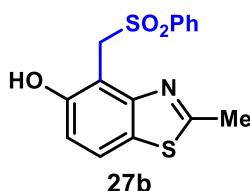

**Physical state:** white powder;

**Melting point:** 185 – 187 °C;

**R<sub>f</sub>** = 0.80 (silica gel, 1:1 EtOAc:hexanes);

**<sup>1</sup>H NMR** (600 MHz, CDCl<sub>3</sub>): δ 7.71 (d, *J* = 7.8 Hz, 2H), 7.62 (d, *J* = 8.6 Hz, 1H), 7.52 (s, 1H), 7.49 (t, *J* = 7.5 Hz, 1H), 7.34 (t, *J* = 7.7 Hz, 2H), 7.11 (d, *J* = 8.6 Hz, 1H), 5.08 (s, 2H), 2.55 (s, 3H) ppm;

**<sup>13</sup>C NMR** (151 MHz, CDCl<sub>3</sub>): δ 167.9, 154.7, 154.0, 137.1, 133.9, 128.9, 128.6, 128.0, 122.6, 117.4, 109.4, 55.1, 20.0 ppm;

**IR** (neat): ν = 3407, 2359, 2335, 1302, 1132, 733 cm<sup>-1</sup>;

**HRMS** (ESI-TOF): calc'd for C<sub>15</sub>H<sub>14</sub>NO<sub>3</sub>S<sub>2</sub> [M+H<sup>+</sup>] 320.0410, found 320.0417.

**Ethyl 7-((phenylsulfonyl)methyl)pyrrolo[1,2-*c*]pyrimidine-3-carboxylate**

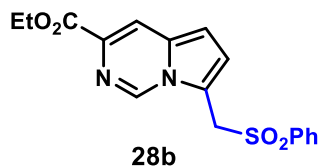

**Physical state:** light yellow solid;

**Melting point:** 162 – 164 °C;

**R<sub>f</sub>** = 0.30 (silica gel, 1:1 EtOAc:hexanes);

**<sup>1</sup>H NMR** (400 MHz, CDCl<sub>3</sub>): δ 8.87 (s, 1H), 8.18 (s, 1H), 7.64 – 7.60 (m, 3H), 7.45 (t, *J* = 7.8 Hz, 2H), 6.67 (d, *J* = 4.1 Hz, 1H), 6.63 (d, *J* = 4.0 Hz, 1H), 4.77 (s, 2H), 4.44 (q, *J* = 7.1 Hz, 2H), 1.43 (t, *J* = 7.1 Hz, 3H) ppm;

**<sup>13</sup>C NMR** (151 MHz, CDCl<sub>3</sub>): δ 165.0, 137.5, 136.0, 134.5, 132.9, 131.5, 129.4, 128.4, 121.4, 117.6, 113.2, 105.3, 61.8, 54.3, 14.6 ppm;

**IR** (neat): ν = 2923, 2360, 2339, 1712, 1151, 782 cm<sup>-1</sup>;

**HRMS** (ESI-TOF): calc'd for C<sub>17</sub>H<sub>17</sub>N<sub>2</sub>O<sub>4</sub>S [M+H<sup>+</sup>] 345.0904, found 345.0910.

**Ethyl 3-((phenylsulfonyl)methyl)imidazo[1,2-*a*]pyridine-2-carboxylate**

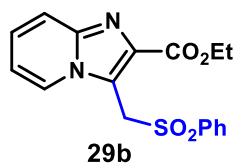

**Physical state:** yellow oil;

**R<sub>f</sub>** = 0.60 (silica gel, 1:10 MeOH:DCM);

**<sup>1</sup>H NMR** (400 MHz, CDCl<sub>3</sub>): δ 8.55 – 8.36 (m, 1H), 7.71 (dd, *J* = 9.1, 1.0 Hz, 1H), 7.59 (ddd, *J* = 7.1, 2.8, 1.5 Hz, 3H), 7.48 – 7.41 (m, 2H), 7.40 – 7.34 (m, 1H), 7.03 (td, *J* = 6.9, 1.2 Hz, 1H), 5.27 (s, 2H), 4.12 (q, *J* = 7.1 Hz, 2H), 1.26 (t, *J* = 7.1 Hz, 3H) ppm;

**<sup>13</sup>C NMR** (151 MHz, CDCl<sub>3</sub>): δ 162.8, 145.6, 137.1, 135.5, 134.2, 129.0, 128.9, 127.4, 125.2, 119.2, 117.1, 114.5, 61.3, 51.8, 14.4 ppm;

**IR** (neat): ν = 2360, 2339, 1709, 1308, 1214, 1130, 733, 523 cm<sup>-1</sup>;

**HRMS** (ESI-TOF): calc'd for C<sub>17</sub>H<sub>17</sub>N<sub>2</sub>O<sub>4</sub>S [M+H<sup>+</sup>] 345.0904, found 345.0903.

**Methyl 7-((phenylsulfonyl)methyl)imidazo[1,2-*a*]pyridine-8-carboxylate**

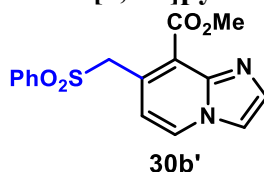

**Physical state:** yellow foam;

$R_f = 0.50$  (silica gel, 1:10 MeOH:DCM);

$^1\text{H NMR}$  (600 MHz,  $\text{CDCl}_3$ ):  $\delta$  8.20 (d,  $J = 7.0$  Hz, 1H), 7.76 (s, 1H), 7.75 – 7.71 (m, 2H), 7.65 (s, 1H), 7.63 (t,  $J = 7.5$  Hz, 1H), 7.49 (t,  $J = 7.9$  Hz, 2H), 6.91 (d,  $J = 7.0$  Hz, 1H), 4.83 (s, 2H), 3.86 (s, 3H) ppm;

$^{13}\text{C NMR}$  (151 MHz, acetone- $d_6$ ):  $\delta$  166.6, 143.1, 139.9, 135.5, 135.0, 130.3, 129.4, 128.7, 125.5, 124.4, 115.8, 114.8, 58.9, 53.0;

**IR** (neat):  $\nu = 2360, 2339, 1716, 1308, 1147, 1083, 728, 527$   $\text{cm}^{-1}$ ;

**HRMS** (ESI-TOF): calc'd for  $\text{C}_{16}\text{H}_{15}\text{N}_2\text{O}_4\text{S}$  [ $\text{M}+\text{H}^+$ ] 331.0747, found 331.0752.

**Methyl 5-((phenylsulfonyl)methyl)imidazo[1,2-*a*]pyridine-8-carboxylate**

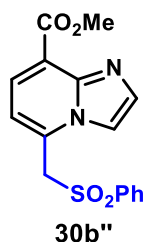

**Physical state:** yellow foam;

$R_f = 0.40$  (silica gel, 1:10 MeOH:DCM);

$^1\text{H NMR}$  (600 MHz,  $\text{CDCl}_3$ ):  $\delta$  7.85 (d,  $J = 7.3$  Hz, 1H), 7.76 (d,  $J = 1.3$  Hz, 1H), 7.70 – 7.66 (m, 3H), 7.66 – 7.62 (m, 1H), 7.53 – 7.42 (m, 2H), 6.57 (d,  $J = 7.4$  Hz, 1H), 4.73 (s, 2H), 4.06 (s, 3H) ppm;

$^{13}\text{C NMR}$  (151 MHz, acetone- $d_6$ ):  $\delta$  165.9, 143.5, 139.5, 135.4, 135.0, 132.1, 130.4, 129.5, 128.1, 121.3, 116.2, 113.6, 59.6, 52.7 ppm;

**IR** (neat):  $\nu = 2360, 2339, 1720, 1301, 1209, 1149, 1083, 744, 527$   $\text{cm}^{-1}$ ;

**HRMS** (ESI-TOF): calc'd for  $\text{C}_{16}\text{H}_{15}\text{N}_2\text{O}_4\text{S}$  [ $\text{M}+\text{H}^+$ ] 331.0747, found 331.0752.

**Methyl 2-((phenylsulfonyl)methyl)imidazo[1,2-*a*]pyrimidine-3-carboxylate**

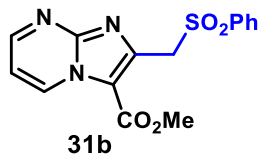

**Physical state:** white solid;

**Melting point:** 280 °C (decomposed);

$R_f$  = 0.75 (silica gel, 1:10 MeOH:DCM);

**$^1\text{H}$  NMR** (400 MHz,  $\text{CDCl}_3$ ):  $\delta$  8.84 (dd,  $J$  = 7.0, 2.0 Hz, 1H), 8.79 (dd,  $J$  = 4.1, 2.0 Hz, 1H), 7.69 – 7.55 (m, 3H), 7.51 – 7.42 (m, 2H), 7.11 (dd,  $J$  = 7.0, 4.0 Hz, 1H), 5.25 (s, 2H), 3.67 (s, 3H) ppm;

**$^{13}\text{C}$  NMR** (151 MHz,  $\text{DMSO-}d_6$ ):  $\delta$  162.3, 153.8, 147.3, 137.1, 135.1 (2C), 134.3, 129.2, 128.2, 116.2, 110.0, 51.6, 50.3 ppm;

**IR** (neat):  $\nu$  = 2361, 2340, 1717, 1309, 1230, 689, 667  $\text{cm}^{-1}$ ;

**HRMS** (ESI-TOF): calc'd for  $\text{C}_{15}\text{H}_{13}\text{N}_3\text{NaO}_4\text{S}$  [ $\text{M}+\text{H}^+$ ] 354.0519, found 354.0523.

### Ethyl 3-((phenylsulfonyl)methyl)imidazo[1,2-*a*]pyrimidine-2-carboxylate

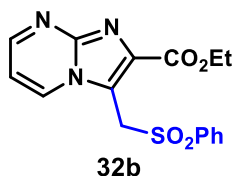

**Physical state:** white powder;

**Melting point:** 208 °C (decomposed);

$R_f$  = 0.45 (silica gel, 10:1 EtOAc:MeOH);

**$^1\text{H}$  NMR** (600 MHz,  $\text{CDCl}_3$ ):  $\delta$  8.85 (d,  $J$  = 6.9 Hz, 1H), 8.77 (d,  $J$  = 4.0 Hz, 1H), 7.62 (t,  $J$  = 7.4 Hz, 1H), 7.58 (d,  $J$  = 7.7 Hz, 2H), 7.45 (t,  $J$  = 7.7 Hz, 2H), 7.10 (dd,  $J$  = 6.9, 4.0 Hz, 1H), 5.27 (s, 2H), 4.12 (q,  $J$  = 7.1 Hz, 2H), 1.25 (t,  $J$  = 7.1 Hz, 3H) ppm;

**$^{13}\text{C}$  NMR** (151 MHz,  $\text{CDCl}_3$ ):  $\delta$  162.5, 153.4, 148.2, 136.7, 136.4, 134.4, 133.5, 129.2, 128.8, 116.0, 110.5, 61.5, 51.4, 14.3 ppm;

**IR** (neat):  $\nu$  = 2924, 2359, 2340, 1715, 1226, 687  $\text{cm}^{-1}$ ;

**HRMS** (ESI-TOF): calc'd for  $\text{C}_{16}\text{H}_{16}\text{N}_3\text{O}_4\text{S}$  [ $\text{M}+\text{H}^+$ ] 346.0856, found 346.0863.

## 7. Characterization data for biologically relevant substrates 33b to 36b

**Methyl (S)-2-acetamido-3-(2-((phenylsulfonyl)methyl)-1H-indol-3-yl)propanoate**

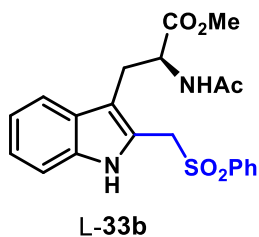

**Physical state:** white foam;

$[\alpha]_{25}^D = +11.1^\circ$  ( $c = 1.0$ ,  $\text{CHCl}_3$ );

$R_f = 0.50$  (silica gel, 4:1 EtOAc:hexanes);

$^1\text{H NMR}$  (600 MHz,  $\text{CDCl}_3$ ):  $\delta$  8.75 (s, 1H), 7.80 – 7.73 (m, 2H), 7.65 (td,  $J = 7.5, 1.4$  Hz, 1H), 7.50 (t,  $J = 7.6$  Hz, 2H), 7.46 (d,  $J = 8.0$  Hz, 1H), 7.35 (d,  $J = 8.2$  Hz, 1H), 7.22 (dd,  $J = 8.3, 6.9$  Hz, 1H), 7.11 (t,  $J = 7.5$  Hz, 1H), 6.40 (d,  $J = 7.2$  Hz, 1H), 4.70 (q,  $J = 6.5$  Hz, 1H), 4.62 – 4.37 (m, 2H), 3.63 (s, 3H), 2.89 (ddd,  $J = 48.7, 14.9, 6.2$  Hz, 2H), 1.94 (s, 3H) ppm;

$^{13}\text{C NMR}$  (151 MHz,  $\text{CDCl}_3$ ):  $\delta$  172.6, 170.3, 137.9, 136.6, 134.5, 129.5, 128.4, 127.6, 123.5, 122.5, 120.2, 119.1, 112.3, 111.5, 53.9, 53.1, 52.7, 26.4, 23.1 ppm;

**IR** (neat):  $\nu = 2360, 2339, 1742, 1651, 1304, 1145, 741, 670$   $\text{cm}^{-1}$ ;

**HRMS** (ESI-TOF): calc'd for  $\text{C}_{21}\text{H}_{23}\text{N}_2\text{O}_5\text{S}$   $[\text{M}+\text{H}^+]$  415.1322, found 415.1325.

**Methyl (S)-2-(((benzyloxy)carbonyl)amino)-3-(2-((phenylsulfonyl)methyl)-1H-indol-3-yl)-propanoate**

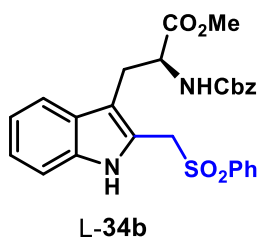

**Physical state:** colorless oil;

$[\alpha]_{25}^D = +13.2^\circ$  ( $c = 1.0$ ,  $\text{CHCl}_3$ );

$R_f = 0.3$  (silica gel, 2:1 EtOAc:hexanes);

$^1\text{H NMR}$  (400 MHz,  $\text{CDCl}_3$ ):  $\delta$  8.73 (s, 1H), 7.66 (d,  $J = 7.6$  Hz, 2H), 7.59 (d,  $J = 7.5$  Hz, 1H), 7.44 – 7.28 (m, 9H), 7.21 (t,  $J = 7.6$  Hz, 1H), 7.07 (t,  $J = 7.5$  Hz, 1H), 5.43 (d,  $J = 7.6$  Hz, 1H), 5.15 – 5.01 (m, 2H), 4.53 – 4.34 (m, 3H), 3.57 (s, 3H), 2.80 (qd,  $J = 14.9, 5.7$  Hz, 2H) ppm;

$^{13}\text{C}$  NMR (151 MHz,  $\text{CDCl}_3$ ):  $\delta$  172.1, 155.8, 137.7, 136.5, 136.3, 134.3, 129.3, 128.7, 128.4 (2C), 128.2, 127.6, 123.4, 122.9, 120.2, 119.0, 111.9, 111.5, 67.1, 54.6, 53.9, 52.6, 26.7 ppm;

IR (neat):  $\nu$  = 3350, 1709, 1446, 1306, 1147, 876, 737  $\text{cm}^{-1}$ ;

HRMS (ESI-TOF): calc'd for  $\text{C}_{27}\text{H}_{27}\text{N}_2\text{O}_6\text{S}$  [ $\text{M}+\text{H}^+$ ] 507.1584, found 507.1589;

### *N*-Acetyl-*S*-((phenylsulfonyl)methyl)-*L*-cysteine

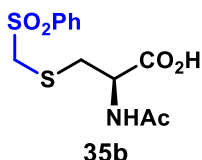

**Physical state:** white solid;

$[\alpha]_{25}^{\text{D}}$  = +16.9° ( $c$  = 0.55, MeOH);

**Melting point:** 105 – 107 °C;

$R_f$  = 0.20 (silica gel, 1:20  $\text{H}_2\text{O}$ : acetone);

$^1\text{H}$  NMR (600 MHz,  $\text{CD}_3\text{OD}$ ):  $\delta$  8.00 – 7.94 (m, 2H), 7.78 – 7.72 (m, 1H), 7.67 – 7.61 (m, 2H), 4.70 – 4.62 (m, 1H), 4.32 (d,  $J$  = 15.0 Hz, 1H), 4.26 (d,  $J$  = 15.0 Hz, 1H), 3.29 (dd,  $J$  = 13.8, 4.9 Hz, 1H), 3.00 (dd,  $J$  = 13.8, 8.4 Hz, 1H), 2.00 (s, 3H) ppm;

$^{13}\text{C}$  NMR (151 MHz,  $\text{CD}_3\text{OD}$ ):  $\delta$  173.3, 173.1, 139.1, 135.3, 130.3, 130.0, 56.6, 53.2, 35.4, 22.4 ppm;

IR (neat):  $\nu$  = 2360, 2339, 1732, 1540, 1304, 1149, 686  $\text{cm}^{-1}$ ;

HRMS (ESI-TOF): calc'd for  $\text{C}_{12}\text{H}_{16}\text{NO}_5\text{S}_2$  [ $\text{M}+\text{H}^+$ ] 318.0464, found 318.0465.

### 5-((Phenylsulfonyl)methyl)pyrimidine-2,4(1*H*,3*H*)-dione

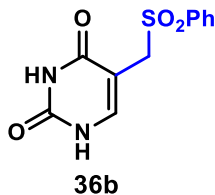

**Physical state:** white solid;

**Melting point:** 172 – 175 °C;

$R_f$  = 0.60 (silica gel, 1:4 MeOH:DCM);

**<sup>1</sup>H NMR** (600 MHz, CD<sub>3</sub>OD): δ 7.88 – 7.83 (m, 2H), 7.74 – 7.70 (m, 1H), 7.63 – 7.59 (m, 2H), 7.42 (s, 1H), 4.22 (s, 2H) ppm;

**<sup>13</sup>C NMR** (151 MHz, CD<sub>3</sub>OD): δ 165.0, 152.9, 144.8, 139.8, 135.2, 130.4, 129.7, 102.4, 53.3 ppm;

**IR** (neat): ν = 2361, 2340, 1653, 1299, 1145, 671 cm<sup>-1</sup>;

**HRMS** (ESI-TOF): calc'd for C<sub>11</sub>H<sub>11</sub>N<sub>2</sub>O<sub>4</sub>S [M+H<sup>+</sup>] 267.0434, found 267.0441.

## 8. Typical procedure for the desulfonylation to reveal the methyl group

**Procedure A** (Mg, MeOH): To a solution of phenylsulfonylmethyl substrate (1.0 equiv.) in dry MeOH (ca. 0.05 M) was added **freshly activated** Mg turnings (40.0 equiv.). After heating at 50 °C for 1.5 h, a white slurry was formed and the reaction was completed. Filtration of the reaction mixture through a short pad of silica gel and concentration of the filtrate gave the crude mixture. Purification of the crude mixture by column chromatography or PTLC gave the desired product.

**Procedure B** (SmI<sub>2</sub>, THF/H<sub>2</sub>O): A solution of phenylsulfonylmethyl substrate (1 equiv.) in THF/H<sub>2</sub>O (10/1, 0.05 M) was degassed for 20 min at room temperature. Then a solution of SmI<sub>2</sub> in THF (ca. 0.03 M, 6 equiv.) was added to the reaction mixture and the resulting deep purple-dark solution was stirred at room temperature for 30 min. The reaction was quenched with saturated NaHCO<sub>3</sub> solution and extracted with EtOAc (3 times). The combined organic phase was washed with brine and dried over Na<sub>2</sub>SO<sub>4</sub>. Purification by column chromatography or PTLC gave the desired desulfonylation product.

**Procedure C** (Raney-Nickel, EtOH): A suspension of phenylsulfonylmethyl substrate (1 equiv.) and Raney-Nickel (activated catalyst, 50% slurry in water) (pre-triturated with EtOH 3 times, 100 mg for 5 mg substrate) in EtOH (0.05 M) was refluxed for 2 h. The catalyst was filtered through a short pad of silica gel and concentration of the filtrate afforded the crude product, which was purified by column chromatography or PTLC gave the desired desulfonylation product.

## 9. Characterization data for methylated products 7c to L-33c

### 1,3,7,8-Tetramethyl-3,7-dihydro-1*H*-purine-2,6-dione

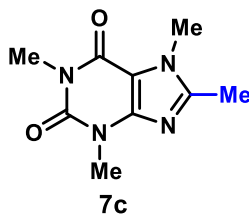

**Physical state:** white powder;

**Melting point:** 189 – 191 °C

$R_f$  = 0.40 (silica gel, 20:1 EtOAc:MeOH);

$^1\text{H NMR}$  (600 MHz,  $\text{CDCl}_3$ ):  $\delta$  3.90 (s, 3H), 3.56 (s, 3H), 3.39 (s, 3H), 2.46 (s, 3H) ppm;

$^{13}\text{C NMR}$  (151 MHz,  $\text{CDCl}_3$ ):  $\delta$  155.4, 151.8, 150.8, 148.0, 107.6, 32.0, 29.8, 28.0, 13.2 ppm;

**IR** (neat):  $\nu$  = 2925, 2360, 2339, 1707, 1650, 1220, 747  $\text{cm}^{-1}$ ;

**HRMS** (ESI-TOF): calc'd for  $\text{C}_9\text{H}_{13}\text{N}_4\text{O}_2$  [ $\text{M}+\text{H}^+$ ] 209.1033, found 209.1040.

**Ethyl 5-methyl-1H-pyrrole-2-carboxylate** (spectroscopic data match those previously reported<sup>1</sup>)

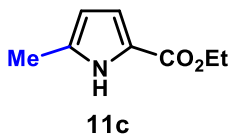

**Physical state:** colorless oil;

$R_f$  = 0.22 (silica gel, 1:5 EtOAc:hexanes);

$^1\text{H NMR}$  (600 MHz,  $\text{CDCl}_3$ ):  $\delta$  9.07 (br s, 1H), 6.81 (t,  $J$  = 3.0 Hz, 1H), 5.95 (t,  $J$  = 3.0 Hz, 1H), 4.30 (q,  $J$  = 7.2 Hz, 1H), 2.31 (s, 3H), 1.35 (t,  $J$  = 7.2 Hz, 1H) ppm;

$^{13}\text{C NMR}$  (151 MHz,  $\text{CDCl}_3$ ):  $\delta$  161.4, 133.8, 121.5, 116.2, 109.0, 60.2, 14.6, 13.3 ppm;

**IR** (neat):  $\nu$  = 3287, 2922, 2361, 1667, 1220, 802  $\text{cm}^{-1}$ ;

**HRMS** (ESI-TOF): calc'd for  $\text{C}_8\text{H}_{12}\text{NO}_2$  [ $\text{M}+\text{H}^+$ ] 154.0863, found 154.0867.

### 3-Methylquinoxalin-2-ol

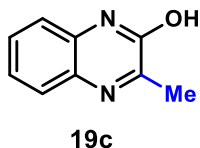

**Physical state:** white powder;

<sup>1</sup> Curran, T. P.; Keaney, M. T., *J. Org. Chem.*, **1996**, *61*, 9068–9069.



**Melting point:** 195 – 197 °C (decomposed);

$R_f$  = 0.55 (silica gel, 1:2 EtOAc:hexanes);

$^1\text{H NMR}$  (600 MHz,  $\text{CDCl}_3$ ):  $\delta$  7.82 (d,  $J$  = 7.8 Hz, 1H), 7.49 (t,  $J$  = 7.8 Hz, 1H), 7.34 (t,  $J$  = 7.8 Hz, 1H), 7.32 (d,  $J$  = 7.8 Hz, 1H), 2.64 (s, 3H) ppm;

$^{13}\text{C NMR}$  (151 MHz,  $\text{CDCl}_3$ ):  $\delta$  159.1, 156.7, 132.9, 131.2, 129.8, 128.8, 124.4, 115.6, 20.9 ppm;

**IR** (neat):  $\nu$  = 2915, 2360, 2338, 1665, 1565, 752  $\text{cm}^{-1}$ ;

**HRMS** (ESI-TOF): calc'd for  $\text{C}_9\text{H}_9\text{N}_2\text{O}$  [ $\text{M}+\text{H}^+$ ] 161.0709, found 161.0712.

**Methyl 2-(2-methyl-1H-indol-3-yl)acetate** (spectroscopic data match those previously reported<sup>2</sup>)

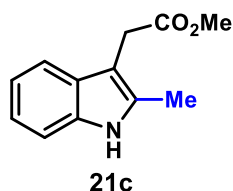

**Physical state:** light yellow oil;

$R_f$  = 0.53 (silica gel, 1:2 EtOAc:hexanes);

$^1\text{H NMR}$  (500 MHz,  $\text{CDCl}_3$ ):  $\delta$  7.84 (br s, 1H), 7.52-7.53 (m, 1H), 7.26 – 7.28 (m, 1H), 7.08 – 7.14 (m, 2H), 3.70 (s, 2H), 3.67 (s, 3H), 2.42 (s, 3H) ppm;

$^{13}\text{C NMR}$  (151 MHz,  $\text{CDCl}_3$ ):  $\delta$  172.6, 135.2, 132.7, 128.6, 121.4, 119.7, 118.2, 110.4, 104.7, 52.1, 30.4, 11.9;

**IR** (neat):  $\nu$  = 3392, 2360, 2339, 1721, 1165, 738  $\text{cm}^{-1}$ ;

**HRMS** (ESI-TOF): calc'd for  $\text{C}_{12}\text{H}_{14}\text{NO}_2$  [ $\text{M}+\text{H}^+$ ] 204.1019, found 204.1026.

**Methyl 3-methyl-1H-indole-2-carboxylate** (spectroscopic data match those previously reported<sup>3</sup>)

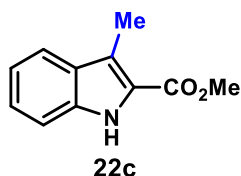

**Physical state:** light brown solid;

<sup>2</sup> Varvaresou, A.; Siatra-Papastaiikoudi, T.; Tsoinias, A.; Tsantili-Kakoulidou, A.; Vamvakides, A. II, *Farmaco*, **1998**, 53, 320-326;

<sup>3</sup> García-Rubia, A.; Urones, B.; Gómez Arrayás, R.; Carretero, J. C. *Angew. Chem. Int. Ed.* **2011**, 50, 10927-10931.

**Melting point:** 123 – 125 °C;

$R_f$  = 0.50 (silica gel, 1:5 EtOAc:hexanes);

$^1\text{H NMR}$  (600 MHz,  $\text{CDCl}_3$ ):  $\delta$  8.66 (br s, 1H), 7.67 (d,  $J$  = 8.4 Hz, 1H), 7.36 (d,  $J$  = 8.4 Hz, 1H), 7.33 (t,  $J$  = 7.8 Hz, 1H), 7.15 (t,  $J$  = 7.8 Hz, 1H), 3.96 (s, 3H), 2.62 (s, 3H) ppm;

$^{13}\text{C NMR}$  (151 MHz,  $\text{CDCl}_3$ ):  $\delta$  163.2, 136.0, 128.7, 125.8, 123.3, 121.0, 120.5, 120.1, 111.8, 51.8, 10.1 ppm;

**IR** (neat):  $\nu$  = 3318, 2950, 1683, 1257, 737  $\text{cm}^{-1}$ ;

**HRMS** (ESI-TOF): calc'd for  $\text{C}_{11}\text{H}_{12}\text{NO}_2$  [ $\text{M}+\text{H}^+$ ] 190.0863, found 190.0857.

### 2,4-Dimethylbenzo[*d*]thiazol-5-ol

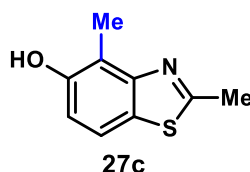

**Physical state:** light yellow solid;

**Melting point:** 155 – 157 °C;

$R_f$  = 0.60 (silica gel, 1:2 EtOAc:hexanes);

$^1\text{H NMR}$  (600 MHz,  $\text{CDCl}_3$ ):  $\delta$  7.49 (d,  $J$  = 8.5 Hz, 1H), 6.90 (d,  $J$  = 8.5 Hz, 1H), 4.97 (s, 1H), 2.82 (s, 3H), 2.62 (s, 3H) ppm;

$^{13}\text{C NMR}$  (151 MHz,  $\text{CDCl}_3$ ):  $\delta$  167.5, 154.1, 152.2, 127.6, 118.7, 117.1, 114.0, 20.4, 11.3 ppm;

**IR** (neat):  $\nu$  = 2922, 2853, 2360, 2338, 1291, 669  $\text{cm}^{-1}$ ;

**HRMS** (ESI-TOF): calc'd for  $\text{C}_9\text{H}_{10}\text{NOS}$  [ $\text{M}+\text{H}^+$ ] 180.0478, found 180.0477.

### Ethyl 7-methylpyrrolo[1,2-*c*]pyrimidine-3-carboxylate

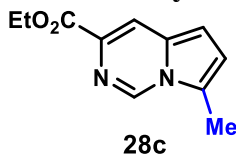

**Physical state:** yellow oil;

$R_f$  = 0.25 (silica gel, 1:1 EtOAc:hexanes);

$^1\text{H NMR}$  (600 MHz,  $\text{CDCl}_3$ ):  $\delta$  8.69 (s, 1H), 8.20 (s, 1H), 6.75 (d,  $J$  = 3.7 Hz, 1H), 6.72 (d,  $J$  = 3.8 Hz, 1H), 4.45 (q,  $J$  = 7.1 Hz, 2H), 2.60 (s, 3H), 1.43 (t,  $J$  = 7.2 Hz, 3H) ppm;

$^{13}\text{C NMR}$  (151 MHz,  $\text{CDCl}_3$ ):  $\delta$  165.4, 135.4, 130.5, 129.0, 122.9, 117.9, 117.4, 104.9, 61.6,

14.6, 11.5 ppm;

**IR** (neat):  $\nu = 2921, 2853, 1702, 1525, 778 \text{ cm}^{-1}$ ;

**HRMS** (ESI-TOF): calc'd for  $\text{C}_{11}\text{H}_{13}\text{N}_2\text{O}_2$   $[\text{M}+\text{H}^+]$  205.0972, found 205.0969.

**Ethyl 3-methylimidazo[1,2-*a*]pyridine-2-carboxylate**

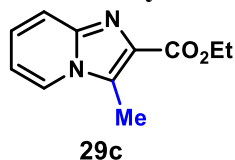

**Physical state:** yellow oil;

$R_f = 0.75$  (silica gel, 1:15 MeOH:DCM, run up twice);

**$^1\text{H}$  NMR** (600 MHz,  $\text{CD}_3\text{OD}$ ):  $\delta$  8.26 (dt,  $J = 7.0, 1.2$  Hz, 1H), 7.57 (dt,  $J = 9.2, 1.1$  Hz, 1H), 7.43 – 7.36 (m, 1H), 7.04 (td,  $J = 6.9, 1.2$  Hz, 1H), 4.42 (q,  $J = 7.1$  Hz, 2H), 2.80 (s, 3H), 1.43 (t,  $J = 7.1$  Hz, 3H) ppm;

**$^{13}\text{C}$  NMR** (151 MHz,  $\text{CD}_3\text{OD}$ ):  $\delta$  165.1, 145.2, 132.4, 127.9, 125.7, 118.4, 114.9, 111.4, 61.8, 14.7, 9.4 ppm;

**IR** (neat):  $\nu = 2360, 2340, 1703, 1220, 1095, 753 \text{ cm}^{-1}$ ;

**HRMS** (ESI-TOF): calc'd for  $\text{C}_{11}\text{H}_{13}\text{N}_2\text{O}_2$   $[\text{M}+\text{H}^+]$  205.0972, found 205.0973.

**Methyl (*S*)-2-acetamido-3-(2-methyl-1*H*-indol-3-yl)propanoate** (spectroscopic data match those previously reported<sup>4</sup>)

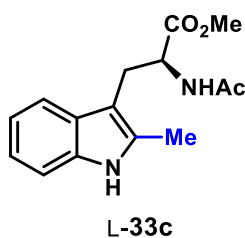

$[\alpha]_{25}^D = +37.1^\circ$  ( $c = 0.35$ ,  $\text{CHCl}_3$ );

**$^1\text{H}$  NMR** (600 MHz,  $\text{CDCl}_3$ ):  $\delta$  7.92 (brs, 1H), 7.41 (d,  $J = 8.5$  Hz, 1H), 7.26 (d,  $J = 7.4$  Hz, 1H), 7.11 (ddd,  $J = 8.1, 7.1, 1.3$  Hz, 1H), 7.07 (ddd,  $J = 8.1, 7.1, 1.2$  Hz, 1H), 6.00 (d,  $J = 8.0$  Hz, 1H), 4.90 (ddd,  $J = 8.0, 6.0, 4.7$  Hz, 1H), 3.67 (s, 3H), 3.32 – 3.22 (m, 2H), 2.34 (s, 3H), 1.94 (s, 3H) ppm;

<sup>4</sup> Angelini, E.; Balsamini, C.; Bartocchini, F.; Lucarini, S.; Piersanti, G. *J. Org. Chem.* **2008**, *73*, 5654-5657.

$^{13}\text{C}$  NMR (151 MHz,  $\text{CDCl}_3$ ):  $\delta$  172.7, 169.7, 135.3, 132.9, 129.2, 121.5, 119.7, 117.9, 110.5, 105.9, 53.1, 52.5, 27.0, 23.4, 11.8 ppm;

## 10. Experimental procedure and characterization data for compounds 7d to 7g

### 1,3,7-Trimethyl-8-(methyl-d<sub>3</sub>)-3,7-dihydro-1H-purine-2,6-dione

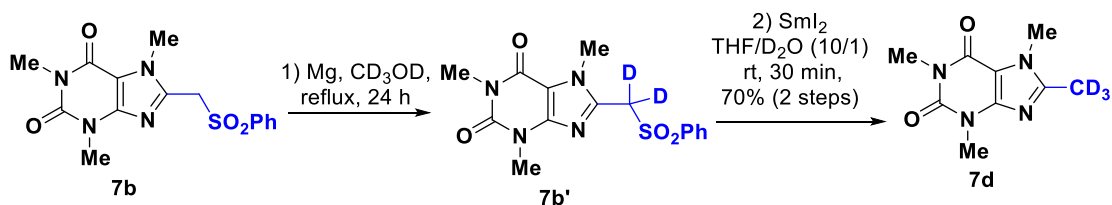

To a solution of **7b** (10.5 mg, 0.03 mmol, 1 equiv.) in  $\text{CD}_3\text{OD}$  (1 mL) was added freshly activated Mg turnings (28.8 mg, 1.2 mmol, 40 equiv.) and the reaction system was heated to reflux for 24 h. By LC-MS, 100% conversion of **7b** to dideuterated product **7b'** was observed but desired product **7d** was not obtained. At this time, the reaction mixture was filtered through a short pad of silica gel and concentration of the filtrate gave the crude product **7b'**. This crude product was dissolved in THF/ $\text{D}_2\text{O}$  (1 mL/0.1 mL) and degassed for 20 min. Then a solution of  $\text{SmI}_2$  in THF (0.15 mmol, 5 equiv.) was added. After stirred at room temperature for 30 min, the reaction system was quenched with sat.  $\text{NaHCO}_3$  solution, and the aqueous layer was extracted with EtOAc (3 times). The combined organic layers were washed with brine and dried over  $\text{Na}_2\text{SO}_4$ . Removal of the solvent and purification of the crude mixture by PTLC (EtOAc/MeOH = 20/1) gave the desired product **7d** (4.4 mg, 70% over two steps, 91% D incorporation as shown by  $^1\text{H}$  NMR).

**Physical state:** white powder;

**Melting point:** 202 – 204 °C;

$R_f$  = 0.40 (silica gel, 20:1 EtOAc:MeOH);

$^1\text{H}$  NMR (600 MHz,  $\text{CDCl}_3$ ):  $\delta$  3.90 (s, 3H), 3.56 (s, 3H), 3.39 (s, 3H) ppm;

$^{13}\text{C}$  NMR (151 MHz,  $\text{CDCl}_3$ ):  $\delta$  155.4, 151.8, 150.8, 148.0, 107.6, 32.0, 29.8, 28.0, 12.7 (sept,  $J_{\text{CD}} = 4.7$  Hz) ppm;

**IR** (neat):  $\nu = 2922, 2360, 2339, 1712, 1649, 1439, 745$   $\text{cm}^{-1}$ ;

**HRMS** (ESI-TOF): calc'd for  $\text{C}_9\text{H}_{10}\text{D}_3\text{N}_4\text{O}_2$  [ $\text{M}+\text{H}^+$ ] 212.1221, found 212.1223.

### 8-(Difluoro(phenylsulfonyl)methyl)-1,3,7-trimethyl-3,7-dihydro-1H-purine-2,6-dione

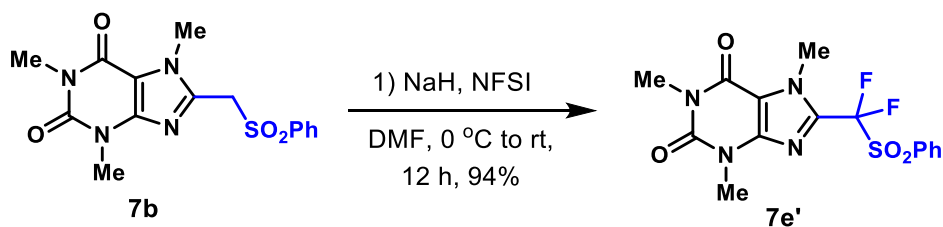

To a solution of **7b** (10.5 mg, 0.03 mmol, 1 equiv.) in dry DMF (0.5 mL) was added 95% NaH (7.2 mg, 0.3 mmol, 10 equiv.) at 0 °C. After 20 min, NFSI (47.3 mg, 0.15 mmol, 5 equiv.) was added to the reaction system and the resulting slurry was warmed to room temperature naturally. After stirring at room temperature for 12 h, the reaction system was quenched with sat. NH<sub>4</sub>Cl solution, and the aqueous layer was extracted with EtOAc (3 times). The combined organic layers were washed with brine and dried over Na<sub>2</sub>SO<sub>4</sub>. Removal of the solvent and purification of the crude mixture by PTLC (6:1 DCM:acetone) gave the desired product **7e'** (10.9 mg, 94% ) as a white solid.

**Physical state:** white solid;

**Melting point:** 189 – 191 °C;

$R_f$  = 0.40 (silica gel, 1:1 EtOAc:hexanes);

**<sup>1</sup>H NMR** (400 MHz, CDCl<sub>3</sub>): δ 8.03 (d,  $J$  = 7.8 Hz, 2H), 7.84 (t,  $J$  = 7.6 Hz, 1H), 7.67 (t,  $J$  = 7.7 Hz, 2H), 4.30 (s, 3H), 3.55 (s, 3H), 3.43 (s, 3H) ppm;

**<sup>13</sup>C NMR** (151 MHz, CDCl<sub>3</sub>): δ 154.9, 150.8, 146.7, 136.7 (t,  $J_{CF}$  = 27.5 Hz), 135.7, 131.4, 130.6, 129.2, 116.5 (t,  $J_{CF}$  = 288.7 Hz), 110.4, 33.8, 29.5, 27.8 ppm;

**<sup>19</sup>F NMR** (376 MHz, CDCl<sub>3</sub>) δ -101.1 ppm.

**IR** (neat):  $\nu$  = 2360, 2339, 1708, 1664, 1169, 729 cm<sup>-1</sup>;

**HRMS** (ESI-TOF): calc'd for C<sub>15</sub>H<sub>15</sub>N<sub>4</sub>O<sub>4</sub> F<sub>2</sub>S [M+H<sup>+</sup>] 385.0777, found 385.0783.

### 8-(Difluoromethyl)-1,3,7-trimethyl-3,7-dihydro-1H-purine-2,6-dione (spectroscopic data match those previously reported<sup>5</sup>)

<sup>5</sup> Fujiwara, Y.; Dixon, J. A.; Rodriguez, R. A.; Baxter, R. D.; Dixon, D. D.; Collins, M. R.; Blackmond, D. G.; Baran, P. S. *J. Am. Chem. Soc.* **2012**, *134*, 1494-1497.

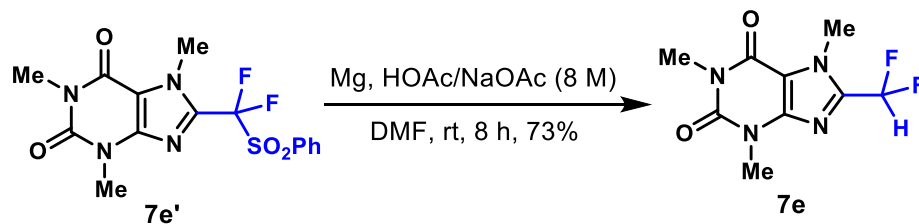

To a solution of **7e'** (5.4 mg, 0.014 mmol, 1 equiv.) in DMF (0.5 mL) and HOAc/NaOAc (1:1) buffer solution (8 mol/L, 0.2 mL) was added freshly activated Mg turnings (10 mg, 0.42 mmol, 30 equiv.) and the reaction system was stirred at room temperature for 8 h. Then, the reaction system was quenched with water and extracted with EtOAc (3 times). The combined organic layers were washed with sat. NaHCO<sub>3</sub> solution, brine and dried over Na<sub>2</sub>SO<sub>4</sub>. Removal of the solvent and purification of the crude mixture by PTLC (2:1 hexanes:EtOAc) gave the desired product **7e** (2.5 mg, 73%) as a white solid.

**Physical state:** white solid;

**Melting point:** 159 – 161 °C;

$R_f$  = 0.50 (silica gel, 1:2 EtOAc:hexanes);

**<sup>1</sup>H NMR** (600 MHz, CDCl<sub>3</sub>): δ 6.74 (t,  $J$  = 52.2 Hz, 1H), 4.15 (s, 3H), 3.56 (s, 3H), 3.41 (s, 3H) ppm;

**<sup>13</sup>C NMR** (101 MHz, CDCl<sub>3</sub>): δ 155.7, 151.6, 147.1, 142.9 (t,  $J_{CF}$  = 27.3 Hz), 109.9 (t,  $J_{CF}$  = 238.9 Hz), 109.6, 33.0, 29.9, 28.3 ppm;

**<sup>19</sup>F NMR** (376 MHz, CDCl<sub>3</sub>) δ -115.3 ppm.

**IR** (neat):  $\nu$  = 2360, 2339, 1710, 1666, 1040, 745 cm<sup>-1</sup>;

**HRMS** (ESI-TOF): calc'd for C<sub>9</sub>H<sub>11</sub>N<sub>4</sub>O<sub>2</sub>F<sub>2</sub> [M+H<sup>+</sup>] 245.0845, found 245.0844.

### Methyl 1,3,7-trimethyl-2,6-dioxo-2,3,6,7-tetrahydro-1H-purine-8-carbodithioate

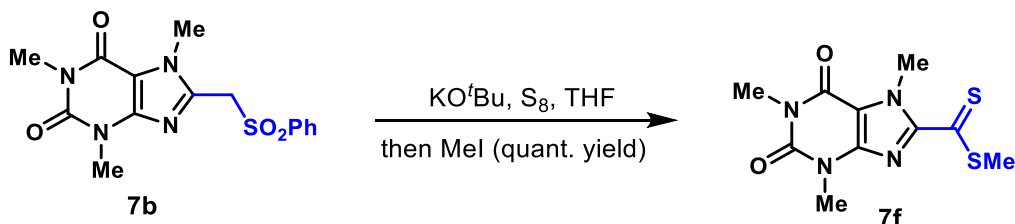

A mixture of sulfone **7b** (10 mg, 0.029 mmol) and elemental sulfur (22.0 mg, 0.086 mmol, 3.0 equiv.) was placed into THF (0.5 mL) under magnetic stirring. After addition of *t*-BuOK (9.7 mg, 0.086 mmol, 3.0 equiv.), the color of the solution changed to dark brown. The reaction was

stirred at r.t. for 1 h. Then, CH<sub>3</sub>I (0.005 mL, 0.086 mmol, 3.0 equiv.) was added to the solution and the stirring was continued for 1 h. Upon completion, the solvent was removed under vacuum, and the residue, dissolved in CH<sub>2</sub>Cl<sub>2</sub> (0.5 mL), was directly purified by chromatography on silica gel (1:10 EtOAc:hexanes), afforded pure dithioester **7f** (8.1 mg, 99%).

**Physical state:** orange solid;

**Melting point:** 161 – 163 °C;

*R<sub>f</sub>* = 0.20 (silica gel, 1:4 EtOAc:hexanes);

<sup>1</sup>H NMR (400 MHz, CDCl<sub>3</sub>): δ 4.33 (s, 3H), 3.64 (s, 3H), 3.43 (s, 3H), 2.72 (s, 3H) ppm;

<sup>13</sup>C NMR (151 MHz, CDCl<sub>3</sub>): δ 212.0, 155.9, 151.6, 148.5, 146.5, 111.2, 35.7, 30.1, 28.4, 19.7 ppm;

**IR** (neat): ν = 2360, 2339, 1704, 1665, 1543, 1098 cm<sup>-1</sup>;

**HRMS** (ESI-TOF): calc'd for C<sub>10</sub>H<sub>13</sub>N<sub>4</sub>O<sub>2</sub>S<sub>2</sub> [M+H<sup>+</sup>] 285.0474, found 285.0472.

**(E)-1,3,7-Trimethyl-8-styryl-3,7-dihydro-1H-purine-2,6-dione**

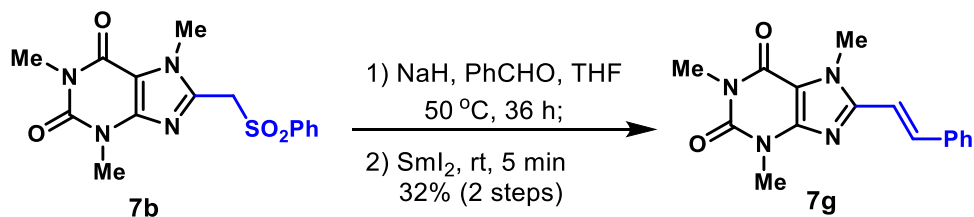

To a solution of **7d** (10.0 mg, 28.7 μmol, 1 equiv.) in THF (1 mL) was added 95% NaH (2.2 mg, 86.1 μmol, 3 equiv.) at room temperature and after 10 min of stirring, benzaldehyde (8.7 μL, 3 equiv.) was added to the reaction mixture. The reaction mixture was stirred at 50 °C for 36 h, quenched with H<sub>2</sub>O, and extracted with EtOAc. The organic layers were combined, washed with brine, dried over Na<sub>2</sub>SO<sub>4</sub>, filtered, and concentrated under reduced pressure. Purification by preparative TLC (SiO<sub>2</sub>, 1:1 EtOAc:hexanes) gave sulfonylalkene (4.3 mg, 9.8 μmol, 34%). To a solution of sulfonylalkene (1.9 mg, 4.35 μmol, 1 equiv.), DMPU (10.5 μL, 87.0 μmol, 20 equiv.), MeOH (3.5 μL, 87.0 μmol, 20 equiv.) in THF (0.5 mL) was added SmI<sub>2</sub> (0.03 M in THF) (1.2 mL, 34.8 μmol, 8 equiv.). The reaction was stirred at room temperature for 5 min, quenched with NaHCO<sub>3</sub> and then extracted with EtOAc. The organic layers were combined, washed with brine, dried over Na<sub>2</sub>SO<sub>4</sub>, filtered, and concentrated under reduced pressure. Purification by preparative TLC (SiO<sub>2</sub>, 1:1 EtOAc:hexanes) gave **7g** (1.2 mg, 9.1 μmol, 93%) as a white solid.

Spectroscopic data match those previously reported<sup>6</sup>.

<sup>1</sup>H NMR (500 MHz, CDCl<sub>3</sub>): δ 7.82 (d, *J* = 15.8 Hz, 1H), 7.59 (d, *J* = 7.5 Hz, 2H), 7.43 – 7.35 (m, 3H), 6.93 (d, *J* = 15.8 Hz, 1H), 4.07 (s, 3H), 3.64 (s, 3H), 3.42 (s, 3H) ppm;

<sup>13</sup>C NMR (151 MHz, CDCl<sub>3</sub>): δ 155.3, 151.8, 149.9, 148.6, 138.4, 135.5, 129.5, 129.0, 127.4, 111.2, 107.9, 31.5, 29.8, 27.9 ppm;

IR (neat): ν = 3729, 3626, 2360, 2340, 2217, 2156, 2043, 1986, 1694, 1665, 1542, 1275;

HRMS (ESI-TOF): calc'd for C<sub>16</sub>H<sub>17</sub>N<sub>4</sub>O<sub>2</sub> [M+H<sup>+</sup>] 297.1352, found 297.1347.

## 11. Experimental procedure and characterization data for biologically important substrates 37c to 39c

### 2-Methyl-Rizatriptan®

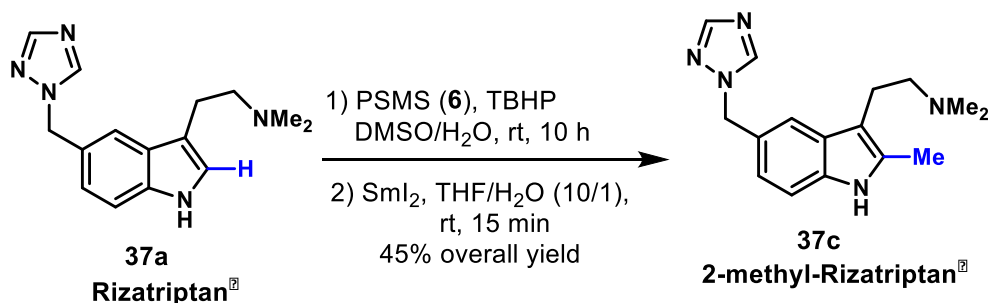

On a 0.05 mmol (19.6 mg) scale, the typical procedure for the reaction of PSMS (6) with heterocycles was followed, employing DMSO/H<sub>2</sub>O (0.4/0.16 mL) as the solvent instead. The reaction was conducted at room temperature for 10 h to yield the desired 2-phenylsulfonylmethyl-Rizatriptan® **37b** (12.6 mg, 60% yield).

On a 0.0064 mmol (2.7 mg) scale, intermediate **37b** was desulfonylated using the typical procedure B for the desulfonylation, affording 1.3 mg of desired 2-methyl-Rizatriptan® **37c** (72%, 45% overall yield over two steps).

### 2-Methyl-Rizatriptan®

**Physical state:** white foam;

**R<sub>f</sub>** = 0.40 (silica gel (pre-treated with Et<sub>3</sub>N), 1:1 EtOAc:MeOH);

<sup>6</sup> Sahnoun, S.; Messaoudi, S.; Brion, J.-D.; Alami, M. *Eur. J. Org. Chem.* **2010**, 31, 6097-6102.



**<sup>1</sup>H NMR** (600 MHz, DMSO-*d*<sub>6</sub>): δ 10.74 (s, 1H), 8.59 (s, 1H), 7.93 (s, 1H), 7.36 (d, *J* = 1.6 Hz, 1H), 7.18 (d, *J* = 8.2 Hz, 1H), 6.93 (dd, *J* = 8.2, 1.7 Hz, 1H), 5.40 (s, 2H), 2.71 (t, *J* = 7.8 Hz, 2H), 2.34 (t, *J* = 7.8 Hz, 2H), 2.29 (s, 3H), 2.19 (s, 6H) ppm;

**<sup>13</sup>C NMR** (151 MHz, DMSO-*d*<sub>6</sub>): δ 151.3, 143.7, 134.7, 132.5, 128.2, 125.7, 120.1, 117.3, 110.5, 108.4, 60.1, 53.1, 45.2, 22.1, 11.3 ppm;

**IR** (neat): ν = 3328, 2921, 2852, 2360, 2339, 1085, 678 cm<sup>-1</sup>;

**HRMS** (ESI-TOF): calc'd for C<sub>16</sub>H<sub>22</sub>N<sub>5</sub><sup>+</sup> [M+H<sup>+</sup>] 284.1870, found 284.1878.

### *N*-Boc-2-methyl-L/D-tryptophan methyl ester

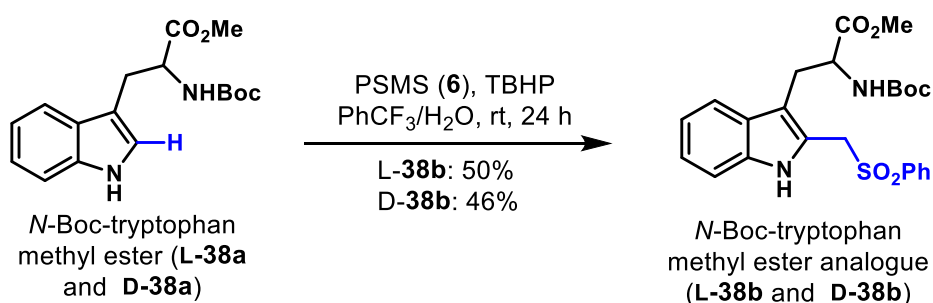

On a 0.2 mmol scale, the typical procedure for the reaction of PSMS with heterocycles was followed, affording L-38b in 50% yield and D-38b in 46% yield, respectively.

**Physical state:** colorless oil (for L-38b and D-38b);

**[α]<sub>25</sub><sup>D</sup>** = +26.0° (*c* = 1.0, CHCl<sub>3</sub>, for L-38b) and -26.2° (*c* = 1.0, CHCl<sub>3</sub>, for D-38b);

**R<sub>f</sub>** = 0.7 (silica gel, 2:1 EtOAc:hexanes);

**<sup>1</sup>H NMR** (600 MHz, CDCl<sub>3</sub>): δ 8.86 (s, 1H), 7.68 (d, *J* = 7.6 Hz, 2H), 7.60 (t, *J* = 7.4 Hz, 1H), 7.49 – 7.37 (m, 3H), 7.35 (d, *J* = 8.2 Hz, 1H), 7.21 (d, *J* = 7.4 Hz, 1H), 7.08 (t, *J* = 7.4 Hz, 1H), 5.12 (d, *J* = 7.2 Hz, 1H), 4.64 – 4.48 (m, 2H), 4.39 – 4.27 (m, 1H), 3.55 (s, 3H), 2.85 – 2.65 (m, 2H), 1.42 (s, 9H) ppm;

**<sup>13</sup>C NMR** (151 MHz, CDCl<sub>3</sub>): δ 172.3, 155.1, 137.7, 136.4, 134.3, 129.3, 128.4, 127.7, 123.3, 123.1, 120.1, 119.1, 112.14, 111.40, 80.2, 54.3, 54.0, 52.5, 28.45, 26.6 ppm;

**IR** (neat): ν = 3364, 2977, 1695, 1502, 1306, 1260, 1147, 734 cm<sup>-1</sup>;

**HRMS** (ESI-TOF): calc'd for C<sub>24</sub>H<sub>28</sub>N<sub>2</sub>NaO<sub>6</sub>S<sup>+</sup> [M+Na<sup>+</sup>] 495.1560, found 495.1560;

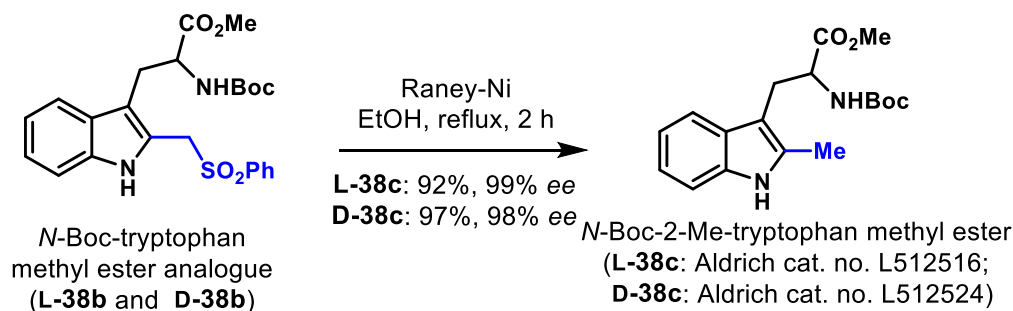

On a 13 mg scale, intermediate **L-38b** and **D-38b** was desulfonylated using the typical procedure C for the desulfonylation, affording desired 2-methyl-tryptophan **L-38c** in 92% yield (99% *ee*) and **D-38c** in 97% yield (98% *ee*).

**Physical state:** colorless oil (for **L-38c** and **D-38c**);

$[\alpha]_{25}^D = +32.5^\circ$  ( $c = 1.0$ ,  $\text{CHCl}_3$ , for **L-38c**) and  $-32.3^\circ$  ( $c = 1.0$ ,  $\text{CHCl}_3$ , for **D-38d**);

$R_f = 0.6$  (silica gel, 2:1 EtOAc:hexanes);

$^1\text{H NMR}$  (600 MHz,  $\text{CDCl}_3$ ):  $\delta$  7.86 (s, 1H), 7.43 (d,  $J = 7.7$  Hz, 1H), 7.25 (d,  $J = 8.1$  Hz, 1H), 7.08 (dt,  $J = 23.6, 7.1$  Hz, 2H), 5.07 (d,  $J = 7.7$  Hz, 1H), 4.60 (q,  $J = 5.5$  Hz, 1H), 3.64 (s, 3H), 3.23 (d,  $J = 5.3$  Hz, 2H), 2.35 (s, 3H), 1.42 (s, 9H) ppm;

$^{13}\text{C NMR}$  (151 MHz,  $\text{CDCl}_3$ ):  $\delta$  172.9, 155.2, 135.3, 132.9, 129.0, 121.3, 119.6, 118.2, 110.3, 106.1, 79.9, 54.3, 52.4, 28.5, 27.4, 11.9 ppm;

**IR** (neat):  $\nu = 3348, 1695, 1365, 1216, 1164, 859, 742, 669$   $\text{cm}^{-1}$ ;

**HRMS** (ESI-TOF): calc'd for  $\text{C}_{18}\text{H}_{24}\text{N}_2\text{NaO}_4^+$  [ $\text{M}+\text{Na}^+$ ] 355.1628, found 355.1628.

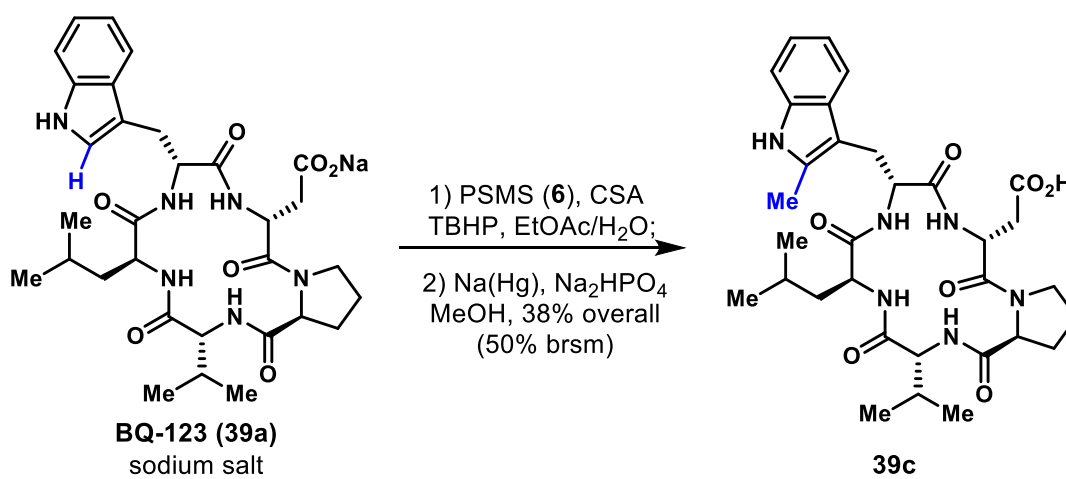

On a 0.02 mmol (12.6 mg) scale, the typical procedure for the reaction of PSMS (**6**) with heterocycles was followed, employing EtOAc/H<sub>2</sub>O(0.3/0.15 mL) as the solvent instead, and camphorsulfonic acid (5.1 mg, 1.1 equiv) as an acid additive. The reaction was conducted at room temperature for 10 h to yield the desired 2-phenylsulfonylmethyl-BQ-123 (**39b**) (6.7 mg, 44% yield, 58% b.r.s.m).

To a solution of **39b** (6.0 mg, 7.8 μmol) and anhydrous disodium hydrogen phosphate (24.0 mg, 169 μmol) in 0.2 ml of dry methanol at room temperature was added pulverized 5% sodium amalgam (60 mg). The mixture was stirred at the same temperature for 40 min to achieve full conversion (monitored by TLC and LC-MS). Upon completion, the reaction mixture was poured into brine, and acidified to pH = 2.0 by 1 M HCl, then extracted with EtOAc (5 mL × 2). The combined organic phase was dried over Na<sub>2</sub>SO<sub>4</sub>, concentrated *in vacuo*, and the residue was purified by PTLC (DCM:MeOH:AcOH = 90:9:0.6) to afford **39c** (4.2 mg, 86% yield).

### 2-methyl-BQ-123 (**39c**)

**Physical state:** white foam;

$[\alpha]_{25}^D = +15.0^\circ$  ( $c = 0.42$ , MeOH);

$R_f = 0.60$  (silica gel, 3:0.3:0.02 DCM:MeOH:AcOH);

**<sup>1</sup>H NMR** (600 MHz, CD<sub>3</sub>OD): δ 8.55 (d,  $J = 5.4$  Hz, 1H), 8.13 (d,  $J = 8.5$  Hz, 1H), 7.91 (d,  $J = 8.9$  Hz, 1H), 7.76 (d,  $J = 10.0$  Hz, 1H), 7.50 (dt,  $J = 7.9, 1.0$  Hz, 1H), 7.22 (dt,  $J = 8.1, 0.9$  Hz, 1H), 7.00 (ddd,  $J = 8.1, 7.0, 1.2$  Hz, 1H), 6.94 (ddd,  $J = 8.0, 7.0, 1.1$  Hz, 1H), 5.13 (ddd,  $J = 9.7, 8.1, 4.1$  Hz, 1H), 4.71 (ddd,  $J = 10.3, 8.5, 4.1$  Hz, 1H), 4.09 (dd,  $J = 10.0, 8.0$  Hz, 1H), 3.93 (td,  $J = 7.7, 5.3$  Hz, 1H), 3.56 – 3.49 (m, 1H), 3.42 (dd,  $J = 14.9, 4.1$  Hz, 1H), 3.39 – 3.32 (m, 2H), 3.04 (dd,  $J = 14.9, 10.3$  Hz, 1H), 2.98 (dd,  $J = 16.5, 10.4$  Hz, 1H), 2.50 (dd,  $J = 16.5, 4.1$  Hz, 1H), 2.41 (s, 3H), 2.40 – 2.34 (m, 1H), 2.08 – 2.00 (m, 2H), 1.86 – 1.79 (m, 1H), 1.79 – 1.71 (m, 1H), 1.28 – 1.20 (m, 2H), 0.94 (d,  $J = 6.7$  Hz, 3H), 0.91 (d,  $J = 6.7$  Hz, 3H), 0.89 – 0.85 (m, 1H), 0.63 (d,  $J = 6.5$  Hz, 3H), 0.61 (d,  $J = 6.6$  Hz, 3H) ppm;

**<sup>13</sup>C NMR** (151 MHz, CD<sub>3</sub>OD): δ 174.9, 174.4, 173.6, 173.55, 173.1, 171.5, 137.2, 134.0, 129.7, 121.5, 119.7, 118.6, 111.4, 106.9, 60.3, 60.2, 56.1, 54.9, 49.6, 47.0, 39.8, 36.7, 31.9, 27.0, 25.5, 25.5, 25.4, 22.8, 22.5, 19.6, 19.0, 11.7 ppm;

**IR** (neat):  $\nu = 3271, 2960, 2361, 2339, 1636, 1538, 1453, 1395$  cm<sup>-1</sup>;

**HRMS** (ESI-TOF): calc'd for C<sub>32</sub>H<sub>45</sub>N<sub>6</sub>O<sub>7</sub> [M+H<sup>+</sup>] 625.3344, found 625.3347.

## 12. HPLC analysis of *N*-Boc-2-methyl-**D/L**-tryptophan methyl ester (**L-38c** and **D-38c**)

Enantiomeric excesses (*ee*) were determined on a Hitachi LaChrow Elite HPLC system using HPLC chiralcel AD-H column (10% isopropanol in hexanes, 0.5 mL/min) *t<sub>r</sub>* = 24.840 min (minor), 37.633 min (major): 99% *ee*.

### Area % Report (for *N*-Boc-2-methyl-**L**-tryptophan methyl ester, **L-38c**)

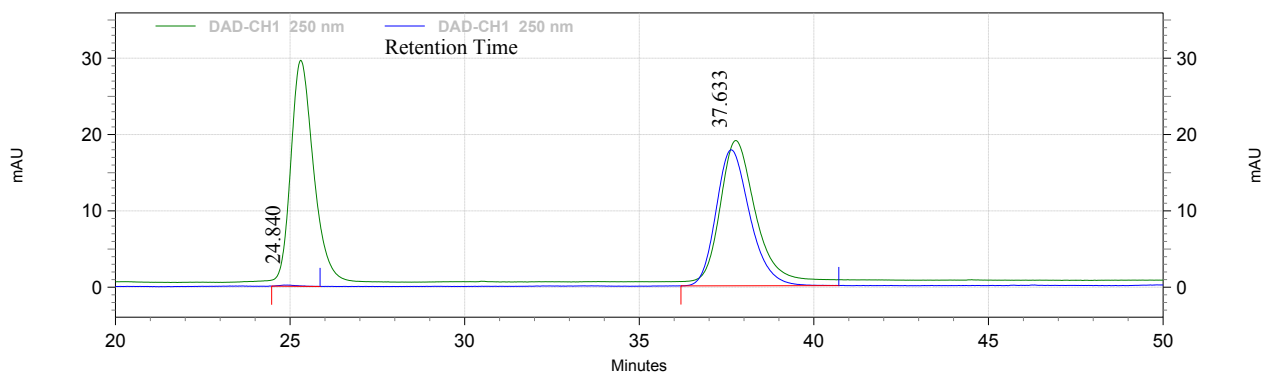

(**green trace**: racemic *N*-Boc-2-methyl-**DL**-tryptophan methyl ester;  
**blue trace**: obtained *N*-Boc-2-methyl-**L**-tryptophan methyl ester **L-38c**)

#### DAD-CH1

#### 250 nm Results

| Retention Time | Area    | Area % | Height | Height % |
|----------------|---------|--------|--------|----------|
| 24.840         | 22553   | 0.47   | 612    | 0.85     |
| 37.633         | 4794201 | 99.53  | 71261  | 99.15    |
| Totals         | 4816754 | 100.00 | 71873  | 100.00   |

Enantiomeric excesses (*ee*) were determined on a Hitachi LaChrow Elite HPLC system using HPLC chiralcel AD-H column (10% isopropanol in hexanes, 0.5 mL/min) *t<sub>r</sub>* = 25.220 min (major), 37.393 min (minor): 98% *ee*.

**Area % Report (for N-Boc-2-methyl-D-tryptophan methyl ester, D-38c)**

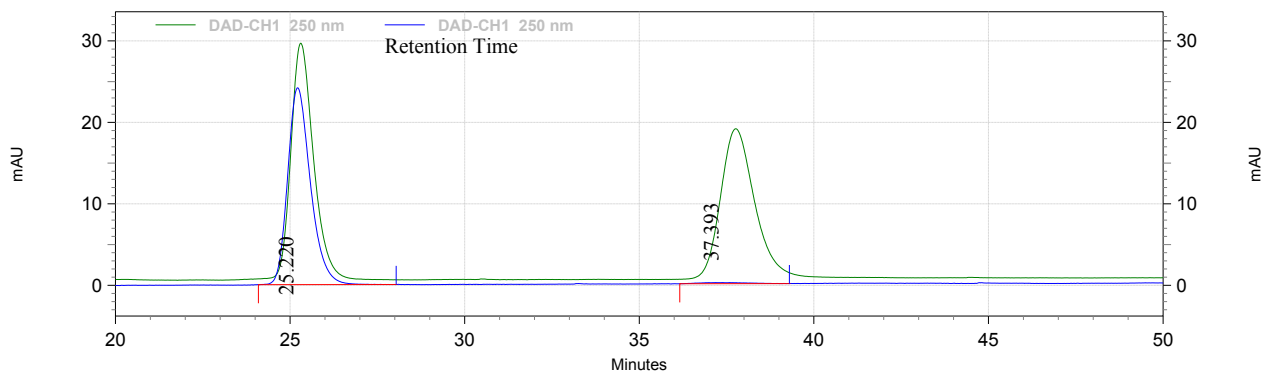

(**green trace**: racemic N-Boc-2-methyl-DL-tryptophan methyl ester;  
**blue trace**: obtained N-Boc-2-methyl-D-tryptophan methyl ester D-38c)

**DAD-CH1  
 250 nm Results**

| Retention Time | Area    | Area % | Height | Height % |
|----------------|---------|--------|--------|----------|
| 25.220         | 4378354 | 98.81  | 96658  | 99.45    |
| 37.393         | 52510   | 1.19   | 533    | 0.55     |

|        |         |        |       |        |
|--------|---------|--------|-------|--------|
| Totals | 4430864 | 100.00 | 97191 | 100.00 |
|--------|---------|--------|-------|--------|

### 13. X-ray crystallographic data for PSMS (6):

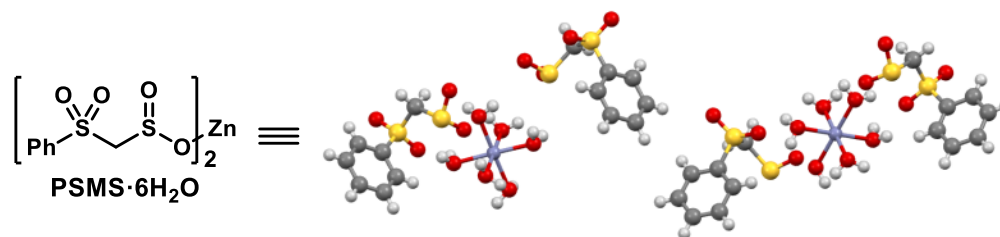

Table S1. Crystal data and structure refinement for CCDC # 982543.

|                                   |                                             |                 |
|-----------------------------------|---------------------------------------------|-----------------|
| Identification code               | CCDC # 982543                               |                 |
| Empirical formula                 | C14 H26 O14 S4 Zn                           |                 |
| Molecular formula                 | Zn(H2O)6, C14 H14 O8                        |                 |
| Formula weight                    | 611.96                                      |                 |
| Temperature                       | 100(2) K                                    |                 |
| Wavelength                        | 0.71073 Å                                   |                 |
| Crystal system                    | Monoclinic                                  |                 |
| Space group                       | P2(1)                                       |                 |
| Unit cell dimensions              | a = 8.2053(5) Å                             | α = 90°.        |
|                                   | b = 32.8177(19) Å                           | β = 92.858(3)°. |
|                                   | c = 8.8796(5) Å                             | γ = 90°.        |
| Volume                            | 2388.1(2) Å <sup>3</sup>                    |                 |
| Z                                 | 4                                           |                 |
| Density (calculated)              | 1.702 Mg/m <sup>3</sup>                     |                 |
| Absorption coefficient            | 1.444 mm <sup>-1</sup>                      |                 |
| F(000)                            | 1264                                        |                 |
| Crystal size                      | 0.10 x 0.08 x 0.05 mm <sup>3</sup>          |                 |
| Crystal color, habit              | colorless / plate                           |                 |
| Theta range for data collection   | 2.30 to 26.61°.                             |                 |
| Index ranges                      | -9 ≤ h ≤ 9, -41 ≤ k ≤ 39, -11 ≤ l ≤ 9       |                 |
| Reflections collected             | 15248                                       |                 |
| Independent reflections           | 7586 [R(int) = 0.0473]                      |                 |
| Completeness to theta = 25.00°    | 90.7 %                                      |                 |
| Absorption correction             | multi-scan / sadabs                         |                 |
| Max. and min. transmission        | 0.9313 and 0.8691                           |                 |
| Refinement method                 | Full-matrix least-squares on F <sup>2</sup> |                 |
| Data / restraints / parameters    | 7586 / 37 / 608                             |                 |
| Goodness-of-fit on F <sup>2</sup> | 1.025                                       |                 |

|                                      |                                    |
|--------------------------------------|------------------------------------|
| Final R indices [ $I > 2\sigma(I)$ ] | R1 = 0.0598, wR2 = 0.1419          |
| R indices (all data)                 | R1 = 0.0830, wR2 = 0.1536          |
| Absolute structure parameter         | 0.00(3)                            |
| Largest diff. peak and hole          | 1.073 and -1.034 e.Å <sup>-3</sup> |

Table S2. Atomic coordinates ( $\times 10^4$ ) and equiv.alent isotropic displacement parameters (Å<sup>2</sup> $\times 10^3$ ) for CCDC # 982543. U(eq) is defined as one third of the trace of the orthogonalized U<sup>ij</sup> tensor.

|       | x       | y       | z        | U(eq) |
|-------|---------|---------|----------|-------|
| Zn(1) | 7555(1) | 8193(1) | 3666(1)  | 16(1) |
| Zn(2) | 7447(2) | 3192(1) | 1333(1)  | 18(1) |
| S(1)  | 7599(3) | 9653(1) | 1397(2)  | 18(1) |
| S(2)  | 8180(3) | 9061(1) | -1189(2) | 16(1) |
| S(3)  | 6339(3) | 4636(1) | 3642(2)  | 17(1) |
| S(4)  | 7004(3) | 4051(1) | 6290(2)  | 18(1) |
| S(5)  | 1417(3) | 6758(1) | 973(2)   | 17(1) |
| S(6)  | 2104(3) | 7332(1) | 3628(2)  | 18(1) |
| S(7)  | 2453(3) | 1735(1) | 4079(2)  | 17(1) |
| S(8)  | 3062(3) | 2321(1) | 1485(2)  | 16(1) |
| O(1)  | 6414(8) | 9953(2) | 1857(7)  | 22(2) |
| O(2)  | 8109(8) | 9341(2) | 2456(6)  | 24(2) |
| O(3)  | 7072(8) | 8960(2) | -2548(6) | 19(2) |
| O(4)  | 8266(8) | 8710(2) | -111(7)  | 16(2) |
| O(5)  | 6661(8) | 4299(2) | 2629(6)  | 21(2) |
| O(6)  | 5178(7) | 4942(2) | 3111(7)  | 18(2) |
| O(7)  | 6702(8) | 3688(2) | 5343(6)  | 21(2) |
| O(8)  | 6117(7) | 4012(2) | 7752(6)  | 19(1) |
| O(9)  | 222(8)  | 6458(2) | 468(7)   | 25(2) |
| O(10) | 1810(8) | 7084(2) | -29(7)   | 23(2) |
| O(11) | 1215(7) | 7376(2) | 5076(6)  | 21(2) |
| O(12) | 1790(8) | 7709(2) | 2682(7)  | 25(2) |
| O(13) | 1238(8) | 1450(2) | 4523(7)  | 25(2) |
| O(14) | 3015(9) | 2038(2) | 5164(7)  | 27(2) |
| O(15) | 1962(7) | 2431(2) | 131(6)   | 18(1) |

|       |           |          |          |       |
|-------|-----------|----------|----------|-------|
| O(16) | 3141(8)   | 2683(2)  | 2565(7)  | 23(2) |
| O(17) | 6174(7)   | 8435(2)  | 1842(6)  | 17(1) |
| O(18) | 7500(8)   | 7623(2)  | 2676(7)  | 25(2) |
| O(19) | 9725(7)   | 8350(2)  | 2672(6)  | 22(2) |
| O(20) | 7686(9)   | 8764(2)  | 4668(7)  | 24(2) |
| O(21) | 5401(7)   | 8040(2)  | 4673(6)  | 20(2) |
| O(22) | 8959(7)   | 7939(2)  | 5502(6)  | 17(1) |
| O(23) | 6229(7)   | 2926(2)  | -534(6)  | 20(2) |
| O(24) | 7218(8)   | 2616(2)  | 2362(7)  | 22(2) |
| O(25) | 9707(7)   | 3047(2)  | 556(6)   | 20(2) |
| O(26) | 7663(8)   | 3769(2)  | 322(6)   | 17(1) |
| O(27) | 5152(8)   | 3336(2)  | 2119(7)  | 24(2) |
| O(28) | 8653(7)   | 3455(2)  | 3183(6)  | 15(1) |
| C(1)  | 9219(13)  | 10275(3) | 85(10)   | 17(2) |
| C(2)  | 10617(13) | 10469(4) | -372(11) | 28(3) |
| C(3)  | 12116(14) | 10282(3) | -103(11) | 23(2) |
| C(4)  | 12216(14) | 9907(3)  | 553(11)  | 28(3) |
| C(5)  | 10864(12) | 9712(3)  | 1036(10) | 19(2) |
| C(6)  | 9322(12)  | 9903(3)  | 784(10)  | 14(2) |
| C(7)  | 6794(11)  | 9419(3)  | -233(10) | 21(2) |
| C(8)  | 8198(15)  | 5257(4)  | 4800(11) | 29(3) |
| C(9)  | 9669(14)  | 5449(4)  | 5130(13) | 33(3) |
| C(10) | 11100(14) | 5257(4)  | 4868(11) | 30(3) |
| C(11) | 11141(13) | 4878(3)  | 4204(11) | 23(2) |
| C(12) | 9627(12)  | 4676(4)  | 3855(11) | 24(2) |
| C(13) | 8210(13)  | 4875(3)  | 4165(10) | 17(2) |
| C(14) | 5632(11)  | 4441(3)  | 5317(9)  | 17(2) |
| C(15) | 4741(12)  | 6680(3)  | 1195(10) | 18(2) |
| C(16) | 6151(15)  | 6491(4)  | 1609(11) | 34(3) |
| C(17) | 6145(15)  | 6113(4)  | 2380(12) | 36(3) |
| C(18) | 4681(15)  | 5938(4)  | 2714(12) | 30(3) |
| C(19) | 3182(13)  | 6133(3)  | 2257(10) | 25(2) |
| C(20) | 3241(13)  | 6509(3)  | 1508(10) | 17(2) |
| C(21) | 745(11)   | 6968(3)  | 2679(10) | 18(2) |
| C(22) | 5672(14)  | 1628(3)  | 3749(11) | 26(3) |
| C(23) | 7058(15)  | 1428(4)  | 3279(12) | 37(3) |



|       |          |         |          |       |
|-------|----------|---------|----------|-------|
| C(24) | 6872(15) | 1061(4) | 2512(13) | 37(3) |
| C(25) | 5324(14) | 902(4)  | 2261(12) | 31(3) |
| C(26) | 3940(15) | 1096(3) | 2759(11) | 28(3) |
| C(27) | 4203(12) | 1473(3) | 3497(10) | 20(2) |
| C(28) | 1650(11) | 1977(3) | 2414(9)  | 15(2) |

Table S3. Bond lengths [Å] and angles [°] for CCDC # 982543.

|             |           |              |           |
|-------------|-----------|--------------|-----------|
| Zn(1)-O(18) | 2.067(7)  | S(5)-O(10)   | 1.437(6)  |
| Zn(1)-O(20) | 2.074(6)  | S(5)-O(9)    | 1.447(7)  |
| Zn(1)-O(21) | 2.082(6)  | S(5)-C(20)   | 1.751(11) |
| Zn(1)-O(17) | 2.088(6)  | S(5)-C(21)   | 1.776(9)  |
| Zn(1)-O(19) | 2.091(6)  | S(6)-O(12)   | 1.509(6)  |
| Zn(1)-O(22) | 2.120(5)  | S(6)-O(11)   | 1.516(6)  |
| Zn(2)-O(28) | 2.064(6)  | S(6)-C(21)   | 1.813(9)  |
| Zn(2)-O(25) | 2.067(6)  | S(7)-O(13)   | 1.438(7)  |
| Zn(2)-O(23) | 2.085(6)  | S(7)-O(14)   | 1.443(6)  |
| Zn(2)-O(27) | 2.094(6)  | S(7)-C(27)   | 1.772(10) |
| Zn(2)-O(26) | 2.107(6)  | S(7)-C(28)   | 1.776(9)  |
| Zn(2)-O(24) | 2.113(7)  | S(8)-O(15)   | 1.511(6)  |
| S(1)-O(2)   | 1.438(6)  | S(8)-O(16)   | 1.525(7)  |
| S(1)-O(1)   | 1.456(7)  | S(8)-C(28)   | 1.842(9)  |
| S(1)-C(7)   | 1.740(9)  | O(17)-H(17A) | 0.8703    |
| S(1)-C(6)   | 1.744(10) | O(17)-H(17B) | 0.8701    |
| S(2)-O(4)   | 1.497(6)  | O(18)-H(18A) | 0.8700    |
| S(2)-O(3)   | 1.511(6)  | O(18)-H(18B) | 0.8700    |
| S(2)-C(7)   | 1.868(9)  | O(19)-H(19A) | 0.8701    |
| S(3)-O(6)   | 1.445(6)  | O(19)-H(19B) | 0.8700    |
| S(3)-O(5)   | 1.458(6)  | O(20)-H(20A) | 0.8700    |
| S(3)-C(14)  | 1.746(9)  | O(20)-H(20B) | 0.8699    |
| S(3)-C(13)  | 1.765(11) | O(21)-H(21C) | 0.8701    |
| S(4)-O(7)   | 1.470(6)  | O(21)-H(21D) | 0.8700    |
| S(4)-O(8)   | 1.525(6)  | O(22)-H(22A) | 0.8700    |
| S(4)-C(14)  | 1.885(8)  | O(22)-H(22B) | 0.8701    |

|                   |           |                   |           |
|-------------------|-----------|-------------------|-----------|
| O(23)-H(23A)      | 0.8701    | C(11)-C(12)       | 1.429(14) |
| O(23)-H(23B)      | 0.8703    | C(11)-H(11)       | 0.9500    |
| O(24)-H(24A)      | 0.8702    | C(12)-C(13)       | 1.374(15) |
| O(24)-H(24B)      | 0.8703    | C(12)-H(12)       | 0.9500    |
| O(25)-H(25A)      | 0.8700    | C(14)-H(14A)      | 0.9900    |
| O(25)-H(25B)      | 0.8701    | C(14)-H(14B)      | 0.9900    |
| O(26)-H(26A)      | 0.8704    | C(15)-C(16)       | 1.346(15) |
| O(26)-H(26B)      | 0.8704    | C(15)-C(20)       | 1.394(14) |
| O(27)-H(27A)      | 0.8700    | C(15)-H(15)       | 0.9500    |
| O(27)-H(27B)      | 0.8702    | C(16)-C(17)       | 1.416(16) |
| O(28)-H(28C)      | 0.8701    | C(16)-H(16)       | 0.9500    |
| O(28)-H(28D)      | 0.8701    | C(17)-C(18)       | 1.377(17) |
| C(1)-C(6)         | 1.370(13) | C(17)-H(17)       | 0.9500    |
| C(1)-C(2)         | 1.391(14) | C(18)-C(19)       | 1.427(15) |
| C(1)-H(1)         | 0.9500    | C(18)-H(18)       | 0.9500    |
| C(2)-C(3)         | 1.385(15) | C(19)-C(20)       | 1.404(14) |
| C(2)-H(2)         | 0.9500    | C(19)-H(19)       | 0.9500    |
| C(3)-C(4)         | 1.363(13) | C(21)-H(21A)      | 0.9900    |
| C(3)-H(3)         | 0.9500    | C(21)-H(21B)      | 0.9900    |
| C(4)-C(5)         | 1.368(14) | C(22)-C(27)       | 1.318(15) |
| C(4)-H(4)         | 0.9500    | C(22)-C(23)       | 1.395(17) |
| C(5)-C(6)         | 1.420(14) | C(22)-H(22)       | 0.9500    |
| C(5)-H(5)         | 0.9500    | C(23)-C(24)       | 1.389(17) |
| C(7)-H(7A)        | 0.9900    | C(23)-H(23)       | 0.9500    |
| C(7)-H(7B)        | 0.9900    | C(24)-C(25)       | 1.381(17) |
| C(8)-C(13)        | 1.374(14) | C(24)-H(24)       | 0.9500    |
| C(8)-C(9)         | 1.380(16) | C(25)-C(26)       | 1.393(16) |
| C(8)-H(8)         | 0.9500    | C(25)-H(25)       | 0.9500    |
| C(9)-C(10)        | 1.363(16) | C(26)-C(27)       | 1.412(15) |
| C(9)-H(9)         | 0.9500    | C(26)-H(26)       | 0.9500    |
| C(10)-C(11)       | 1.378(15) | C(28)-H(28A)      | 0.9900    |
| C(10)-H(10)       | 0.9500    | C(28)-H(28B)      | 0.9900    |
| O(18)-Zn(1)-O(20) | 178.3(3)  | O(18)-Zn(1)-O(17) | 90.9(2)   |
| O(18)-Zn(1)-O(21) | 87.9(3)   | O(20)-Zn(1)-O(17) | 90.2(2)   |
| O(20)-Zn(1)-O(21) | 93.5(3)   | O(21)-Zn(1)-O(17) | 89.2(2)   |

|                   |          |                     |          |
|-------------------|----------|---------------------|----------|
| O(18)-Zn(1)-O(19) | 92.6(3)  | O(6)-S(3)-C(13)     | 109.2(4) |
| O(20)-Zn(1)-O(19) | 86.1(3)  | O(5)-S(3)-C(13)     | 108.5(4) |
| O(21)-Zn(1)-O(19) | 179.5(3) | C(14)-S(3)-C(13)    | 105.1(4) |
| O(17)-Zn(1)-O(19) | 91.1(2)  | O(7)-S(4)-O(8)      | 110.2(4) |
| O(18)-Zn(1)-O(22) | 88.3(2)  | O(7)-S(4)-C(14)     | 102.0(4) |
| O(20)-Zn(1)-O(22) | 90.6(2)  | O(8)-S(4)-C(14)     | 98.5(4)  |
| O(21)-Zn(1)-O(22) | 90.9(2)  | O(10)-S(5)-O(9)     | 119.0(4) |
| O(17)-Zn(1)-O(22) | 179.2(3) | O(10)-S(5)-C(20)    | 107.5(4) |
| O(19)-Zn(1)-O(22) | 88.9(2)  | O(9)-S(5)-C(20)     | 108.8(4) |
| O(28)-Zn(2)-O(25) | 87.7(2)  | O(10)-S(5)-C(21)    | 109.2(4) |
| O(28)-Zn(2)-O(23) | 179.9(3) | O(9)-S(5)-C(21)     | 107.1(4) |
| O(25)-Zn(2)-O(23) | 92.3(2)  | C(20)-S(5)-C(21)    | 104.3(4) |
| O(28)-Zn(2)-O(27) | 92.5(2)  | O(12)-S(6)-O(11)    | 108.6(4) |
| O(25)-Zn(2)-O(27) | 179.7(3) | O(12)-S(6)-C(21)    | 101.4(4) |
| O(23)-Zn(2)-O(27) | 87.5(2)  | O(11)-S(6)-C(21)    | 98.4(4)  |
| O(28)-Zn(2)-O(26) | 85.2(2)  | O(13)-S(7)-O(14)    | 117.9(4) |
| O(25)-Zn(2)-O(26) | 88.2(3)  | O(13)-S(7)-C(27)    | 110.3(5) |
| O(23)-Zn(2)-O(26) | 94.8(2)  | O(14)-S(7)-C(27)    | 107.0(5) |
| O(27)-Zn(2)-O(26) | 92.0(3)  | O(13)-S(7)-C(28)    | 106.7(4) |
| O(28)-Zn(2)-O(24) | 94.5(2)  | O(14)-S(7)-C(28)    | 109.9(4) |
| O(25)-Zn(2)-O(24) | 92.2(3)  | C(27)-S(7)-C(28)    | 104.3(4) |
| O(23)-Zn(2)-O(24) | 85.4(2)  | O(15)-S(8)-O(16)    | 108.6(4) |
| O(27)-Zn(2)-O(24) | 87.5(3)  | O(15)-S(8)-C(28)    | 97.9(4)  |
| O(26)-Zn(2)-O(24) | 179.5(3) | O(16)-S(8)-C(28)    | 101.8(4) |
| O(2)-S(1)-O(1)    | 118.3(4) | Zn(1)-O(17)-H(17A)  | 109.1    |
| O(2)-S(1)-C(7)    | 108.4(4) | Zn(1)-O(17)-H(17B)  | 109.5    |
| O(1)-S(1)-C(7)    | 107.5(4) | H(17A)-O(17)-H(17B) | 109.5    |
| O(2)-S(1)-C(6)    | 109.0(5) | Zn(1)-O(18)-H(18A)  | 109.9    |
| O(1)-S(1)-C(6)    | 109.4(4) | Zn(1)-O(18)-H(18B)  | 108.6    |
| C(7)-S(1)-C(6)    | 103.2(5) | H(18A)-O(18)-H(18B) | 109.5    |
| O(4)-S(2)-O(3)    | 110.5(4) | Zn(1)-O(19)-H(19A)  | 109.7    |
| O(4)-S(2)-C(7)    | 101.8(4) | Zn(1)-O(19)-H(19B)  | 109.1    |
| O(3)-S(2)-C(7)    | 98.3(4)  | H(19A)-O(19)-H(19B) | 109.5    |
| O(6)-S(3)-O(5)    | 117.5(4) | Zn(1)-O(20)-H(20A)  | 109.5    |
| O(6)-S(3)-C(14)   | 106.9(4) | Zn(1)-O(20)-H(20B)  | 109.3    |
| O(5)-S(3)-C(14)   | 108.9(4) | H(20A)-O(20)-H(20B) | 109.5    |

|                     |           |                     |           |
|---------------------|-----------|---------------------|-----------|
| Zn(1)-O(21)-H(21C)  | 109.4     | C(4)-C(5)-C(6)      | 118.3(9)  |
| Zn(1)-O(21)-H(21D)  | 109.3     | C(4)-C(5)-H(5)      | 120.9     |
| H(21C)-O(21)-H(21D) | 109.5     | C(6)-C(5)-H(5)      | 120.9     |
| Zn(1)-O(22)-H(22A)  | 109.1     | C(1)-C(6)-C(5)      | 119.9(9)  |
| Zn(1)-O(22)-H(22B)  | 109.7     | C(1)-C(6)-S(1)      | 121.8(8)  |
| H(22A)-O(22)-H(22B) | 109.5     | C(5)-C(6)-S(1)      | 118.2(8)  |
| Zn(2)-O(23)-H(23A)  | 109.2     | S(1)-C(7)-S(2)      | 116.2(5)  |
| Zn(2)-O(23)-H(23B)  | 109.7     | S(1)-C(7)-H(7A)     | 108.2     |
| H(23A)-O(23)-H(23B) | 109.4     | S(2)-C(7)-H(7A)     | 108.2     |
| Zn(2)-O(24)-H(24A)  | 108.7     | S(1)-C(7)-H(7B)     | 108.2     |
| Zn(2)-O(24)-H(24B)  | 109.6     | S(2)-C(7)-H(7B)     | 108.2     |
| H(24A)-O(24)-H(24B) | 109.4     | H(7A)-C(7)-H(7B)    | 107.4     |
| Zn(2)-O(25)-H(25A)  | 109.6     | C(13)-C(8)-C(9)     | 118.6(11) |
| Zn(2)-O(25)-H(25B)  | 109.0     | C(13)-C(8)-H(8)     | 120.7     |
| H(25A)-O(25)-H(25B) | 109.5     | C(9)-C(8)-H(8)      | 120.7     |
| Zn(2)-O(26)-H(26A)  | 109.9     | C(10)-C(9)-C(8)     | 120.3(12) |
| Zn(2)-O(26)-H(26B)  | 109.0     | C(10)-C(9)-H(9)     | 119.9     |
| H(26A)-O(26)-H(26B) | 109.4     | C(8)-C(9)-H(9)      | 119.9     |
| Zn(2)-O(27)-H(27A)  | 109.6     | C(9)-C(10)-C(11)    | 122.1(11) |
| Zn(2)-O(27)-H(27B)  | 108.9     | C(9)-C(10)-H(10)    | 119.0     |
| H(27A)-O(27)-H(27B) | 109.5     | C(11)-C(10)-H(10)   | 119.0     |
| Zn(2)-O(28)-H(28C)  | 109.7     | C(10)-C(11)-C(12)   | 118.2(10) |
| Zn(2)-O(28)-H(28D)  | 109.3     | C(10)-C(11)-H(11)   | 120.9     |
| H(28C)-O(28)-H(28D) | 109.5     | C(12)-C(11)-H(11)   | 120.9     |
| C(6)-C(1)-C(2)      | 120.5(10) | C(13)-C(12)-C(11)   | 118.0(11) |
| C(6)-C(1)-H(1)      | 119.7     | C(13)-C(12)-H(12)   | 121.0     |
| C(2)-C(1)-H(1)      | 119.7     | C(11)-C(12)-H(12)   | 121.0     |
| C(3)-C(2)-C(1)      | 119.0(11) | C(8)-C(13)-C(12)    | 122.7(11) |
| C(3)-C(2)-H(2)      | 120.5     | C(8)-C(13)-S(3)     | 119.3(9)  |
| C(1)-C(2)-H(2)      | 120.5     | C(12)-C(13)-S(3)    | 118.0(8)  |
| C(4)-C(3)-C(2)      | 120.6(11) | S(3)-C(14)-S(4)     | 115.1(5)  |
| C(4)-C(3)-H(3)      | 119.7     | S(3)-C(14)-H(14A)   | 108.5     |
| C(2)-C(3)-H(3)      | 119.7     | S(4)-C(14)-H(14A)   | 108.5     |
| C(3)-C(4)-C(5)      | 121.6(10) | S(3)-C(14)-H(14B)   | 108.5     |
| C(3)-C(4)-H(4)      | 119.2     | S(4)-C(14)-H(14B)   | 108.5     |
| C(5)-C(4)-H(4)      | 119.2     | H(14A)-C(14)-H(14B) | 107.5     |

|                     |           |                     |           |
|---------------------|-----------|---------------------|-----------|
| C(16)-C(15)-C(20)   | 121.1(11) | C(25)-C(26)-C(27)   | 116.1(11) |
| C(16)-C(15)-H(15)   | 119.5     | C(25)-C(26)-H(26)   | 122.0     |
| C(20)-C(15)-H(15)   | 119.5     | C(27)-C(26)-H(26)   | 121.9     |
| C(15)-C(16)-C(17)   | 120.7(11) | C(22)-C(27)-C(26)   | 122.3(11) |
| C(15)-C(16)-H(16)   | 119.6     | C(22)-C(27)-S(7)    | 120.7(9)  |
| C(17)-C(16)-H(16)   | 119.7     | C(26)-C(27)-S(7)    | 117.0(8)  |
| C(18)-C(17)-C(16)   | 119.6(11) | S(7)-C(28)-S(8)     | 115.6(5)  |
| C(18)-C(17)-H(17)   | 120.2     | S(7)-C(28)-H(28A)   | 108.4     |
| C(16)-C(17)-H(17)   | 120.2     | S(8)-C(28)-H(28A)   | 108.4     |
| C(17)-C(18)-C(19)   | 120.1(11) | S(7)-C(28)-H(28B)   | 108.4     |
| C(17)-C(18)-H(18)   | 120.0     | S(8)-C(28)-H(28B)   | 108.4     |
| C(19)-C(18)-H(18)   | 120.0     | H(28A)-C(28)-H(28B) | 107.5     |
| C(20)-C(19)-C(18)   | 118.6(10) |                     |           |
| C(20)-C(19)-H(19)   | 120.7     |                     |           |
| C(18)-C(19)-H(19)   | 120.7     |                     |           |
| C(15)-C(20)-C(19)   | 120.0(10) |                     |           |
| C(15)-C(20)-S(5)    | 120.6(8)  |                     |           |
| C(19)-C(20)-S(5)    | 119.4(8)  |                     |           |
| S(5)-C(21)-S(6)     | 116.2(5)  |                     |           |
| S(5)-C(21)-H(21A)   | 108.2     |                     |           |
| S(6)-C(21)-H(21A)   | 108.2     |                     |           |
| S(5)-C(21)-H(21B)   | 108.2     |                     |           |
| S(6)-C(21)-H(21B)   | 108.2     |                     |           |
| H(21A)-C(21)-H(21B) | 107.4     |                     |           |
| C(27)-C(22)-C(23)   | 121.3(12) |                     |           |
| C(27)-C(22)-H(22)   | 119.3     |                     |           |
| C(23)-C(22)-H(22)   | 119.3     |                     |           |
| C(24)-C(23)-C(22)   | 118.9(12) |                     |           |
| C(24)-C(23)-H(23)   | 120.5     |                     |           |
| C(22)-C(23)-H(23)   | 120.5     |                     |           |
| C(25)-C(24)-C(23)   | 119.0(12) |                     |           |
| C(25)-C(24)-H(24)   | 120.5     |                     |           |
| C(23)-C(24)-H(24)   | 120.5     |                     |           |
| C(24)-C(25)-C(26)   | 122.3(12) |                     |           |
| C(24)-C(25)-H(25)   | 118.9     |                     |           |
| C(26)-C(25)-H(25)   | 118.9     |                     |           |

---

Symmetry transformations used to generate equivalent atoms:

Table S4. Anisotropic displacement parameters ( $\text{\AA}^2 \times 10^3$ ) for CCDC # 982543. The anisotropic displacement factor exponent takes the form:  $-2\pi^2 [h^2 a^{*2} U^{11} + \dots + 2 h k a^* b^* U^{12}]$

|       | $U^{11}$ | $U^{22}$ | $U^{33}$ | $U^{23}$ | $U^{13}$ | $U^{12}$ |
|-------|----------|----------|----------|----------|----------|----------|
| Zn(1) | 14(1)    | 22(1)    | 13(1)    | -1(1)    | 2(1)     | 1(1)     |
| Zn(2) | 15(1)    | 25(1)    | 16(1)    | 1(1)     | 3(1)     | 1(1)     |
| S(1)  | 20(1)    | 20(1)    | 15(1)    | 0(1)     | 3(1)     | -2(1)    |
| S(2)  | 15(1)    | 21(1)    | 13(1)    | 0(1)     | 5(1)     | 0(1)     |
| S(3)  | 13(1)    | 24(1)    | 15(1)    | 0(1)     | 3(1)     | 1(1)     |
| S(4)  | 10(1)    | 26(1)    | 18(1)    | 1(1)     | 3(1)     | -1(1)    |
| S(5)  | 15(1)    | 21(1)    | 16(1)    | 0(1)     | 1(1)     | -2(1)    |
| S(6)  | 13(1)    | 25(1)    | 17(1)    | -2(1)    | 4(1)     | 0(1)     |
| S(7)  | 16(1)    | 21(1)    | 14(1)    | 1(1)     | 3(1)     | 0(1)     |
| S(8)  | 12(1)    | 22(1)    | 16(1)    | 2(1)     | 5(1)     | 2(1)     |
| O(1)  | 20(4)    | 21(4)    | 26(4)    | -4(3)    | 7(3)     | 6(3)     |
| O(2)  | 34(4)    | 22(4)    | 16(3)    | 4(3)     | -4(3)    | 0(3)     |
| O(3)  | 27(4)    | 23(4)    | 9(3)     | -6(2)    | 9(3)     | -5(3)    |
| O(4)  | 16(4)    | 15(3)    | 19(3)    | -3(2)    | 3(3)     | 3(3)     |
| O(5)  | 23(4)    | 27(4)    | 14(3)    | -8(3)    | 1(3)     | 3(3)     |
| O(6)  | 11(4)    | 20(4)    | 24(4)    | 1(3)     | -3(3)    | 5(3)     |
| O(7)  | 33(4)    | 24(4)    | 9(3)     | -2(3)    | 8(3)     | 5(3)     |
| O(8)  | 14(4)    | 27(4)    | 15(3)    | -3(3)    | 5(3)     | -3(3)    |
| O(9)  | 24(4)    | 27(4)    | 23(4)    | -2(3)    | -6(3)    | -1(3)    |
| O(10) | 19(4)    | 30(4)    | 20(4)    | 3(3)     | 1(3)     | -2(3)    |
| O(11) | 21(4)    | 32(4)    | 11(3)    | -7(3)    | 2(3)     | 8(3)     |
| O(12) | 24(4)    | 23(4)    | 30(4)    | 8(3)     | 6(3)     | 3(3)     |
| O(13) | 20(4)    | 36(4)    | 19(4)    | 3(3)     | 11(3)    | 2(3)     |
| O(14) | 39(5)    | 24(4)    | 18(3)    | -2(3)    | 7(3)     | -2(3)    |
| O(15) | 15(4)    | 25(4)    | 14(3)    | 1(3)     | 3(3)     | 5(3)     |
| O(16) | 21(4)    | 25(4)    | 24(4)    | -7(3)    | 9(3)     | -7(3)    |
| O(17) | 17(4)    | 26(4)    | 9(3)     | -4(2)    | 4(3)     | 2(3)     |

|       |       |       |       |        |        |       |
|-------|-------|-------|-------|--------|--------|-------|
| O(18) | 27(5) | 38(4) | 11(3) | -4(3)  | 5(3)   | 2(3)  |
| O(19) | 18(4) | 32(4) | 16(3) | 2(3)   | 0(3)   | -1(3) |
| O(20) | 51(5) | 13(4) | 10(3) | 3(3)   | 12(3)  | -7(3) |
| O(21) | 17(4) | 29(4) | 15(3) | 2(3)   | 8(3)   | 1(3)  |
| O(22) | 11(4) | 21(4) | 18(3) | 3(2)   | -6(3)  | -5(3) |
| O(23) | 18(4) | 18(3) | 23(4) | 2(3)   | -11(3) | -3(3) |
| O(24) | 21(4) | 24(4) | 23(4) | -6(3)  | 9(3)   | -3(3) |
| O(25) | 14(4) | 23(4) | 23(3) | -4(3)  | 6(3)   | 3(3)  |
| O(26) | 12(4) | 15(4) | 24(3) | 6(3)   | -3(3)  | 1(3)  |
| O(27) | 19(4) | 21(4) | 31(4) | -2(3)  | -2(3)  | 0(3)  |
| O(28) | 8(3)  | 26(3) | 11(3) | -2(2)  | 8(2)   | -1(2) |
| C(1)  | 9(4)  | 20(4) | 23(4) | -5(3)  | 3(3)   | 4(3)  |
| C(2)  | 30(7) | 28(7) | 26(6) | 8(4)   | 15(5)  | -5(5) |
| C(3)  | 29(7) | 17(5) | 24(5) | 2(4)   | 6(5)   | -4(4) |
| C(4)  | 24(7) | 29(6) | 30(6) | 11(5)  | -1(5)  | 8(5)  |
| C(5)  | 16(6) | 19(5) | 23(5) | 2(4)   | 7(4)   | 10(4) |
| C(6)  | 9(4)  | 18(4) | 17(4) | 0(3)   | 4(3)   | -1(3) |
| C(7)  | 19(5) | 24(5) | 20(5) | 1(4)   | -4(4)  | 2(4)  |
| C(8)  | 30(7) | 30(6) | 26(6) | -9(5)  | 1(5)   | 3(5)  |
| C(9)  | 24(7) | 19(7) | 55(7) | -5(5)  | -4(6)  | 2(5)  |
| C(10) | 14(6) | 51(8) | 24(6) | 7(5)   | -5(5)  | -8(5) |
| C(11) | 10(6) | 28(6) | 33(6) | 5(5)   | 5(5)   | 1(5)  |
| C(12) | 11(5) | 30(6) | 30(6) | -1(5)  | -9(4)  | 5(5)  |
| C(13) | 10(6) | 24(6) | 17(5) | 6(4)   | 5(4)   | -2(5) |
| C(14) | 10(5) | 31(6) | 9(4)  | -1(4)  | -3(4)  | 7(4)  |
| C(15) | 13(4) | 26(4) | 17(4) | -7(3)  | 6(3)   | 4(3)  |
| C(16) | 22(7) | 66(9) | 14(5) | -14(5) | 10(5)  | 4(6)  |
| C(17) | 34(8) | 28(7) | 46(7) | -17(5) | -5(6)  | 18(6) |
| C(18) | 32(8) | 19(6) | 37(6) | -8(4)  | -8(5)  | 9(5)  |
| C(19) | 16(4) | 29(4) | 28(4) | -4(3)  | -1(3)  | -5(4) |
| C(20) | 14(6) | 25(6) | 14(5) | -5(4)  | 3(4)   | -4(4) |
| C(21) | 6(5)  | 21(5) | 27(5) | -6(4)  | 10(4)  | 2(4)  |
| C(22) | 31(7) | 21(6) | 25(6) | 6(4)   | -2(5)  | -1(5) |
| C(23) | 22(7) | 61(9) | 29(6) | 24(6)  | 0(5)   | 5(6)  |
| C(24) | 24(7) | 41(8) | 45(7) | -2(5)  | -1(6)  | 19(6) |
| C(25) | 28(7) | 22(7) | 41(7) | -3(5)  | -5(6)  | 5(5)  |

|       |       |       |       |       |       |       |
|-------|-------|-------|-------|-------|-------|-------|
| C(26) | 31(7) | 20(6) | 35(6) | -7(5) | 9(5)  | 3(5)  |
| C(27) | 10(6) | 36(6) | 13(5) | 8(4)  | -1(4) | 11(4) |
| C(28) | 12(4) | 20(4) | 14(3) | 0(3)  | 8(3)  | 1(3)  |

Table S5. Hydrogen coordinates ( $\times 10^4$ ) and isotropic displacement parameters ( $\text{\AA}^2 \times 10^{-3}$ ) for CCDC # 982543.

|        | x     | y    | z    | U(eq) |
|--------|-------|------|------|-------|
| H(17A) | 5384  | 8581 | 2178 | 26    |
| H(17B) | 5769  | 8238 | 1286 | 26    |
| H(18A) | 7308  | 7646 | 1707 | 37    |
| H(18B) | 6725  | 7481 | 3058 | 37    |
| H(19A) | 9511  | 8434 | 1754 | 33    |
| H(19B) | 10356 | 8137 | 2659 | 33    |
| H(20A) | 6847  | 8799 | 5215 | 36    |
| H(20B) | 7686  | 8950 | 3970 | 36    |
| H(21C) | 5068  | 7802 | 4347 | 30    |
| H(21D) | 4660  | 8222 | 4441 | 30    |
| H(22A) | 8315  | 7874 | 6213 | 25    |
| H(22B) | 9674  | 8116 | 5845 | 25    |
| H(23A) | 5458  | 3089 | -873 | 30    |
| H(23B) | 5804  | 2695 | -275 | 30    |
| H(24A) | 7379  | 2428 | 1695 | 34    |
| H(24B) | 6242  | 2590 | 2691 | 34    |
| H(25A) | 9985  | 2803 | 857  | 30    |
| H(25B) | 10423 | 3222 | 914  | 30    |
| H(26A) | 8619  | 3872 | 559  | 26    |
| H(26B) | 6910  | 3929 | 644  | 26    |
| H(27A) | 4464  | 3143 | 1875 | 35    |
| H(27B) | 4817  | 3564 | 1708 | 35    |
| H(28C) | 9558  | 3324 | 3396 | 22    |
| H(28D) | 8036  | 3443 | 3951 | 22    |



|        |       |       |      |    |
|--------|-------|-------|------|----|
| H(1)   | 8185  | 10401 | -88  | 21 |
| H(2)   | 10544 | 10726 | -862 | 33 |
| H(3)   | 13082 | 10417 | -377 | 28 |
| H(4)   | 13250 | 9777  | 677  | 33 |
| H(5)   | 10955 | 9455  | 1528 | 23 |
| H(7A)  | 6448  | 9634  | -962 | 25 |
| H(7B)  | 5804  | 9266  | 24   | 25 |
| H(8)   | 7198  | 5386  | 5007 | 34 |
| H(9)   | 9685  | 5716  | 5543 | 40 |
| H(10)  | 12100 | 5388  | 5152 | 36 |
| H(11)  | 12149 | 4754  | 3983 | 28 |
| H(12)  | 9600  | 4411  | 3422 | 29 |
| H(14A) | 4550  | 4315  | 5095 | 20 |
| H(14B) | 5478  | 4670  | 6022 | 20 |
| H(15)  | 4770  | 6933  | 682  | 22 |
| H(16)  | 7160  | 6613  | 1381 | 41 |
| H(17)  | 7144  | 5982  | 2666 | 43 |
| H(18)  | 4670  | 5688  | 3249 | 36 |
| H(19)  | 2165  | 6010  | 2455 | 30 |
| H(21A) | 558   | 6741  | 3385 | 22 |
| H(21B) | -319  | 7103  | 2459 | 22 |
| H(22)  | 5790  | 1881  | 4262 | 31 |
| H(23)  | 8112  | 1541  | 3480 | 45 |
| H(24)  | 7796  | 921   | 2165 | 44 |
| H(25)  | 5198  | 651   | 1731 | 37 |
| H(26)  | 2881  | 981   | 2612 | 34 |
| H(28A) | 673   | 2135  | 2668 | 18 |
| H(28B) | 1288  | 1764  | 1683 | 18 |

---

Table S6. Torsion angles [°] for CCDC # 982543.

---

|                     |          |
|---------------------|----------|
| C(6)-C(1)-C(2)-C(3) | -0.4(15) |
| C(1)-C(2)-C(3)-C(4) | 2.3(16)  |
| C(2)-C(3)-C(4)-C(5) | -3.4(16) |

|                         |           |
|-------------------------|-----------|
| C(3)-C(4)-C(5)-C(6)     | 2.5(16)   |
| C(2)-C(1)-C(6)-C(5)     | -0.4(15)  |
| C(2)-C(1)-C(6)-S(1)     | 179.1(8)  |
| C(4)-C(5)-C(6)-C(1)     | -0.6(14)  |
| C(4)-C(5)-C(6)-S(1)     | 179.9(8)  |
| O(2)-S(1)-C(6)-C(1)     | -163.0(8) |
| O(1)-S(1)-C(6)-C(1)     | -32.2(9)  |
| C(7)-S(1)-C(6)-C(1)     | 82.0(9)   |
| O(2)-S(1)-C(6)-C(5)     | 16.5(9)   |
| O(1)-S(1)-C(6)-C(5)     | 147.3(7)  |
| C(7)-S(1)-C(6)-C(5)     | -98.5(8)  |
| O(2)-S(1)-C(7)-S(2)     | -57.8(6)  |
| O(1)-S(1)-C(7)-S(2)     | 173.2(5)  |
| C(6)-S(1)-C(7)-S(2)     | 57.6(6)   |
| O(4)-S(2)-C(7)-S(1)     | 71.0(6)   |
| O(3)-S(2)-C(7)-S(1)     | -175.9(5) |
| C(13)-C(8)-C(9)-C(10)   | -1.8(17)  |
| C(8)-C(9)-C(10)-C(11)   | 3.3(18)   |
| C(9)-C(10)-C(11)-C(12)  | -3.2(16)  |
| C(10)-C(11)-C(12)-C(13) | 1.7(14)   |
| C(9)-C(8)-C(13)-C(12)   | 0.5(16)   |
| C(9)-C(8)-C(13)-S(3)    | -176.6(8) |
| C(11)-C(12)-C(13)-C(8)  | -0.4(15)  |
| C(11)-C(12)-C(13)-S(3)  | 176.7(7)  |
| O(6)-S(3)-C(13)-C(8)    | 34.8(9)   |
| O(5)-S(3)-C(13)-C(8)    | 164.0(8)  |
| C(14)-S(3)-C(13)-C(8)   | -79.7(9)  |
| O(6)-S(3)-C(13)-C(12)   | -142.5(8) |
| O(5)-S(3)-C(13)-C(12)   | -13.3(9)  |
| C(14)-S(3)-C(13)-C(12)  | 103.1(8)  |
| O(6)-S(3)-C(14)-S(4)    | -177.1(4) |
| O(5)-S(3)-C(14)-S(4)    | 54.9(6)   |
| C(13)-S(3)-C(14)-S(4)   | -61.1(6)  |
| O(7)-S(4)-C(14)-S(3)    | -75.4(6)  |
| O(8)-S(4)-C(14)-S(3)    | 171.7(5)  |
| C(20)-C(15)-C(16)-C(17) | -0.2(15)  |

|                         |           |
|-------------------------|-----------|
| C(15)-C(16)-C(17)-C(18) | -0.2(15)  |
| C(16)-C(17)-C(18)-C(19) | 1.3(15)   |
| C(17)-C(18)-C(19)-C(20) | -1.9(15)  |
| C(16)-C(15)-C(20)-C(19) | -0.4(14)  |
| C(16)-C(15)-C(20)-S(5)  | 179.6(7)  |
| C(18)-C(19)-C(20)-C(15) | 1.5(14)   |
| C(18)-C(19)-C(20)-S(5)  | -178.6(7) |
| O(10)-S(5)-C(20)-C(15)  | 11.8(9)   |
| O(9)-S(5)-C(20)-C(15)   | 141.9(7)  |
| C(21)-S(5)-C(20)-C(15)  | -104.1(8) |
| O(10)-S(5)-C(20)-C(19)  | -168.1(7) |
| O(9)-S(5)-C(20)-C(19)   | -38.0(9)  |
| C(21)-S(5)-C(20)-C(19)  | 76.0(8)   |
| O(10)-S(5)-C(21)-S(6)   | -53.9(6)  |
| O(9)-S(5)-C(21)-S(6)    | 176.0(5)  |
| C(20)-S(5)-C(21)-S(6)   | 60.8(7)   |
| O(12)-S(6)-C(21)-S(5)   | 77.3(6)   |
| O(11)-S(6)-C(21)-S(5)   | -171.7(5) |
| C(27)-C(22)-C(23)-C(24) | 0.9(16)   |
| C(22)-C(23)-C(24)-C(25) | -1.1(17)  |
| C(23)-C(24)-C(25)-C(26) | -0.4(18)  |
| C(24)-C(25)-C(26)-C(27) | 2.0(17)   |
| C(23)-C(22)-C(27)-C(26) | 0.8(16)   |
| C(23)-C(22)-C(27)-S(7)  | -179.1(8) |
| C(25)-C(26)-C(27)-C(22) | -2.2(15)  |
| C(25)-C(26)-C(27)-S(7)  | 177.7(8)  |
| O(13)-S(7)-C(27)-C(22)  | -146.1(8) |
| O(14)-S(7)-C(27)-C(22)  | -16.7(9)  |
| C(28)-S(7)-C(27)-C(22)  | 99.8(8)   |
| O(13)-S(7)-C(27)-C(26)  | 34.0(9)   |
| O(14)-S(7)-C(27)-C(26)  | 163.4(7)  |
| C(28)-S(7)-C(27)-C(26)  | -80.2(8)  |
| O(13)-S(7)-C(28)-S(8)   | -173.7(5) |
| O(14)-S(7)-C(28)-S(8)   | 57.4(6)   |
| C(27)-S(7)-C(28)-S(8)   | -57.0(6)  |
| O(15)-S(8)-C(28)-S(7)   | 176.5(5)  |

O(16)-S(8)-C(28)-S(7)

-72.5(6)

---

Symmetry transformations used to generate equivalent atoms:

## 14. X-ray crystallographic data for 18b:

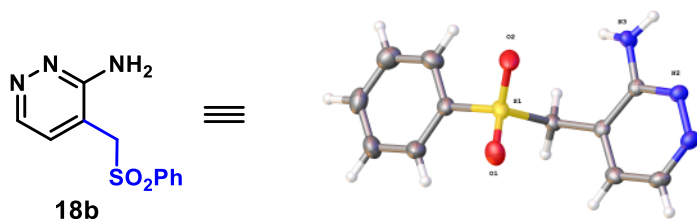

Table S7. Crystal data and structure refinement for CCDC # 982544.

|                                 |                                                                                                                                        |                  |
|---------------------------------|----------------------------------------------------------------------------------------------------------------------------------------|------------------|
| Identification code             | CCDC # 982544                                                                                                                          |                  |
| Empirical formula               | C <sub>12</sub> H <sub>15</sub> Cl N <sub>3</sub> O <sub>3</sub> S                                                                     |                  |
| Molecular formula               | C <sub>11</sub> H <sub>11</sub> N <sub>3</sub> O <sub>2</sub> S, 0.5(C <sub>2</sub> H <sub>4</sub> Cl <sub>2</sub> ), H <sub>2</sub> O |                  |
| Formula weight                  | 316.78                                                                                                                                 |                  |
| Temperature                     | 100.0 K                                                                                                                                |                  |
| Wavelength                      | 0.71073 Å                                                                                                                              |                  |
| Crystal system                  | Monoclinic                                                                                                                             |                  |
| Space group                     | C 1 2/c 1                                                                                                                              |                  |
| Unit cell dimensions            | a = 33.464(4) Å                                                                                                                        | α = 90°.         |
|                                 | b = 5.2123(6) Å                                                                                                                        | β = 101.711(4)°. |
|                                 | c = 16.8968(17) Å                                                                                                                      | γ = 90°.         |
| Volume                          | 2885.9(6) Å <sup>3</sup>                                                                                                               |                  |
| Z                               | 8                                                                                                                                      |                  |
| Density (calculated)            | 1.458 Mg/m <sup>3</sup>                                                                                                                |                  |
| Absorption coefficient          | 0.420 mm <sup>-1</sup>                                                                                                                 |                  |
| F(000)                          | 1320                                                                                                                                   |                  |
| Crystal size                    | 0.157 x 0.035 x 0.008 mm <sup>3</sup>                                                                                                  |                  |
| Crystal color, habit            | Colorless Blade                                                                                                                        |                  |
| Theta range for data collection | 1.243 to 25.782°.                                                                                                                      |                  |
| Index ranges                    | -40 ≤ h ≤ 40, -6 ≤ k ≤ 6, -20 ≤ l ≤ 20                                                                                                 |                  |
| Reflections collected           | 41812                                                                                                                                  |                  |
| Independent reflections         | 2768 [R(int) = 0.0865]                                                                                                                 |                  |
| Completeness to theta = 25.000° | 100.0 %                                                                                                                                |                  |
| Absorption correction           | Semi-empirical from equivalents                                                                                                        |                  |
| Max. and min. transmission      | 0.0921 and 0.0670                                                                                                                      |                  |
| Refinement method               | Full-matrix least-squares on F <sup>2</sup>                                                                                            |                  |
| Data / restraints / parameters  | 2768 / 7 / 209                                                                                                                         |                  |

|                                   |                                    |
|-----------------------------------|------------------------------------|
| Goodness-of-fit on F <sup>2</sup> | 1.072                              |
| Final R indices [I>2sigma(I)]     | R1 = 0.0518, wR2 = 0.1127          |
| R indices (all data)              | R1 = 0.0801, wR2 = 0.1285          |
| Extinction coefficient            | n/a                                |
| Largest diff. peak and hole       | 0.443 and -0.416 e.Å <sup>-3</sup> |

Table S8. Atomic coordinates ( $\times 10^4$ ) and equivalent isotropic displacement parameters ( $\text{\AA}^2 \times 10^3$ ) for CCDC # 982544.  $U(\text{eq})$  is defined as one third of the trace of the orthogonalized  $U^{ij}$  tensor.

|        | x       | y        | z        | U(eq) |
|--------|---------|----------|----------|-------|
| S(1)   | 3828(1) | 6431(2)  | 8953(1)  | 27(1) |
| O(1)   | 4113(1) | 7616(5)  | 9603(1)  | 35(1) |
| O(2)   | 3766(1) | 3717(4)  | 8993(2)  | 38(1) |
| N(1)   | 2958(1) | 6777(5)  | 11100(2) | 26(1) |
| N(2)   | 2833(1) | 5125(5)  | 10490(2) | 22(1) |
| N(3)   | 2804(1) | 3736(5)  | 9204(2)  | 23(1) |
| C(1)   | 3187(1) | 8764(7)  | 11005(2) | 28(1) |
| C(2)   | 3318(1) | 9220(6)  | 10284(2) | 25(1) |
| C(3)   | 3200(1) | 7581(6)  | 9654(2)  | 20(1) |
| C(4)   | 2946(1) | 5493(6)  | 9779(2)  | 20(1) |
| C(5)   | 3346(1) | 7973(6)  | 8877(2)  | 22(1) |
| C(6)   | 3970(1) | 7177(6)  | 8029(2)  | 27(1) |
| C(7)   | 3840(1) | 5619(7)  | 7360(2)  | 36(1) |
| C(8)   | 3960(1) | 6208(8)  | 6644(2)  | 41(1) |
| C(9)   | 4206(1) | 8289(8)  | 6596(2)  | 40(1) |
| C(10)  | 4335(1) | 9838(8)  | 7273(2)  | 41(1) |
| C(11)  | 4216(1) | 9284(7)  | 7990(2)  | 35(1) |
| Cl(1S) | 4992(1) | 3928(3)  | 8776(1)  | 63(1) |
| C(1S)  | 5071(2) | 5750(20) | 9680(10) | 36(4) |
| C(1SB) | 4940(3) | 3710(20) | 9813(14) | 55(6) |
| O(1S)  | 2662(1) | 5672(5)  | 12455(1) | 35(1) |

Table S9. Bond lengths [Å] and angles [°] for CCDC # 982544.

|               |           |                  |            |
|---------------|-----------|------------------|------------|
| S(1)-O(1)     | 1.439(3)  | C(1SB)-C(1SB)#1  | 1.50(3)    |
| S(1)-O(2)     | 1.434(3)  | C(1SB)-H(1SC)    | 0.9900     |
| S(1)-C(5)     | 1.784(3)  | C(1SB)-H(1SD)    | 0.9900     |
| S(1)-C(6)     | 1.765(3)  | O(1S)-H(1S)      | 0.895(19)  |
| N(1)-N(2)     | 1.344(4)  | O(1S)-H(1SE)     | 0.91(2)    |
| N(1)-C(1)     | 1.317(4)  | O(1S)-H(1SF)     | 0.90(2)    |
| N(2)-C(4)     | 1.345(4)  |                  |            |
| N(3)-H(3A)    | 0.872(18) | O(1)-S(1)-C(5)   | 108.08(15) |
| N(3)-H(3B)    | 0.887(18) | O(1)-S(1)-C(6)   | 109.00(15) |
| N(3)-C(4)     | 1.349(4)  | O(2)-S(1)-O(1)   | 117.84(16) |
| C(1)-H(1)     | 0.9500    | O(2)-S(1)-C(5)   | 108.04(15) |
| C(1)-C(2)     | 1.396(5)  | O(2)-S(1)-C(6)   | 109.12(16) |
| C(2)-H(2)     | 0.9500    | C(6)-S(1)-C(5)   | 103.85(15) |
| C(2)-C(3)     | 1.359(4)  | C(1)-N(1)-N(2)   | 120.6(3)   |
| C(3)-C(4)     | 1.423(4)  | N(1)-N(2)-C(4)   | 119.6(3)   |
| C(3)-C(5)     | 1.505(4)  | H(3A)-N(3)-H(3B) | 120(3)     |
| C(5)-H(5A)    | 0.9900    | C(4)-N(3)-H(3A)  | 119(3)     |
| C(5)-H(5B)    | 0.9900    | C(4)-N(3)-H(3B)  | 118(2)     |
| C(6)-C(7)     | 1.388(5)  | N(1)-C(1)-H(1)   | 118.9      |
| C(6)-C(11)    | 1.381(5)  | N(1)-C(1)-C(2)   | 122.2(3)   |
| C(7)-H(7)     | 0.9500    | C(2)-C(1)-H(1)   | 118.9      |
| C(7)-C(8)     | 1.382(5)  | C(1)-C(2)-H(2)   | 120.5      |
| C(8)-H(8)     | 0.9500    | C(3)-C(2)-C(1)   | 118.9(3)   |
| C(8)-C(9)     | 1.375(6)  | C(3)-C(2)-H(2)   | 120.5      |
| C(9)-H(9)     | 0.9500    | C(2)-C(3)-C(4)   | 116.9(3)   |
| C(9)-C(10)    | 1.395(5)  | C(2)-C(3)-C(5)   | 120.2(3)   |
| C(10)-H(10)   | 0.9500    | C(4)-C(3)-C(5)   | 122.9(3)   |
| C(10)-C(11)   | 1.381(5)  | N(2)-C(4)-N(3)   | 115.2(3)   |
| C(11)-H(11)   | 0.9500    | N(2)-C(4)-C(3)   | 121.7(3)   |
| Cl(1S)-C(1S)  | 1.773(18) | N(3)-C(4)-C(3)   | 123.1(3)   |
| Cl(1S)-C(1SB) | 1.80(2)   | S(1)-C(5)-H(5A)  | 109.9      |
| C(1S)-C(1S)#1 | 1.49(3)   | S(1)-C(5)-H(5B)  | 109.9      |
| C(1S)-H(1SA)  | 0.9900    | C(3)-C(5)-S(1)   | 109.0(2)   |
| C(1S)-H(1SB)  | 0.9900    | C(3)-C(5)-H(5A)  | 109.9      |

|                        |           |
|------------------------|-----------|
| C(3)-C(5)-H(5B)        | 109.9     |
| H(5A)-C(5)-H(5B)       | 108.3     |
| C(7)-C(6)-S(1)         | 119.7(3)  |
| C(11)-C(6)-S(1)        | 119.1(3)  |
| C(11)-C(6)-C(7)        | 121.2(3)  |
| C(6)-C(7)-H(7)         | 120.5     |
| C(8)-C(7)-C(6)         | 119.0(3)  |
| C(8)-C(7)-H(7)         | 120.5     |
| C(7)-C(8)-H(8)         | 119.6     |
| C(9)-C(8)-C(7)         | 120.7(4)  |
| C(9)-C(8)-H(8)         | 119.6     |
| C(8)-C(9)-H(9)         | 120.1     |
| C(8)-C(9)-C(10)        | 119.7(3)  |
| C(10)-C(9)-H(9)        | 120.1     |
| C(9)-C(10)-H(10)       | 119.9     |
| C(11)-C(10)-C(9)       | 120.2(4)  |
| C(11)-C(10)-H(10)      | 119.9     |
| C(6)-C(11)-C(10)       | 119.2(3)  |
| C(6)-C(11)-H(11)       | 120.4     |
| C(10)-C(11)-H(11)      | 120.4     |
| Cl(1S)-C(1S)-H(1SA)    | 109.8     |
| Cl(1S)-C(1S)-H(1SB)    | 109.8     |
| C(1S)#1-C(1S)-Cl(1S)   | 109.4(12) |
| C(1S)#1-C(1S)-H(1SA)   | 109.8     |
| C(1S)#1-C(1S)-H(1SB)   | 109.8     |
| H(1SA)-C(1S)-H(1SB)    | 108.2     |
| Cl(1S)-C(1SB)-H(1SC)   | 110.5     |
| Cl(1S)-C(1SB)-H(1SD)   | 110.5     |
| C(1SB)#1-C(1SB)-Cl(1S) | 106.3(15) |
| C(1SB)#1-C(1SB)-H(1SC) | 110.5     |
| C(1SB)#1-C(1SB)-H(1SD) | 110.5     |
| H(1SC)-C(1SB)-H(1SD)   | 108.7     |
| H(1S)-O(1S)-H(1SE)     | 100(3)    |
| H(1S)-O(1S)-H(1SF)     | 102(3)    |



---

Symmetry transformations used to generate equivalent atoms:

#1 -x+1,-y+1,-z+2

Table S10. Anisotropic displacement parameters ( $\text{\AA}^2 \times 10^3$ ) for CCDC # 982544. The anisotropic displacement factor exponent takes the form:  $-2\pi^2 [ h^2 a^{*2} U^{11} + \dots + 2 h k a^* b^* U^{12} ]$

---

|        | $U^{11}$ | $U^{22}$ | $U^{33}$ | $U^{23}$ | $U^{13}$ | $U^{12}$ |
|--------|----------|----------|----------|----------|----------|----------|
| S(1)   | 26(1)    | 21(1)    | 36(1)    | 5(1)     | 12(1)    | 2(1)     |
| O(1)   | 25(1)    | 45(2)    | 34(1)    | 4(1)     | 4(1)     | 1(1)     |
| O(2)   | 46(2)    | 18(1)    | 58(2)    | 7(1)     | 28(1)    | 4(1)     |
| N(1)   | 30(2)    | 25(2)    | 23(1)    | 0(1)     | 6(1)     | 3(1)     |
| N(2)   | 26(1)    | 21(1)    | 21(1)    | 1(1)     | 4(1)     | 1(1)     |
| N(3)   | 27(2)    | 23(2)    | 21(1)    | 3(1)     | 6(1)     | -5(1)    |
| C(1)   | 35(2)    | 22(2)    | 27(2)    | -3(1)    | 4(1)     | 1(2)     |
| C(2)   | 26(2)    | 18(2)    | 32(2)    | 3(1)     | 6(1)     | 2(1)     |
| C(3)   | 20(2)    | 18(2)    | 22(2)    | 5(1)     | 4(1)     | 6(1)     |
| C(4)   | 20(2)    | 17(2)    | 22(2)    | 4(1)     | 5(1)     | 5(1)     |
| C(5)   | 22(2)    | 18(2)    | 27(2)    | 3(1)     | 6(1)     | -1(1)    |
| C(6)   | 27(2)    | 21(2)    | 35(2)    | 2(1)     | 12(1)    | 3(1)     |
| C(7)   | 38(2)    | 27(2)    | 43(2)    | 2(2)     | 9(2)     | -6(2)    |
| C(8)   | 51(2)    | 39(2)    | 34(2)    | -2(2)    | 9(2)     | 3(2)     |
| C(9)   | 39(2)    | 43(2)    | 43(2)    | 6(2)     | 21(2)    | 9(2)     |
| C(10)  | 40(2)    | 39(2)    | 52(2)    | 1(2)     | 25(2)    | -8(2)    |
| C(11)  | 39(2)    | 25(2)    | 44(2)    | -4(2)    | 18(2)    | -5(2)    |
| Cl(1S) | 44(1)    | 81(1)    | 67(1)    | -27(1)   | 20(1)    | -11(1)   |
| C(1S)  | 25(4)    | 29(5)    | 52(9)    | -11(4)   | 6(4)     | -2(3)    |
| C(1SB) | 36(5)    | 42(7)    | 83(14)   | -17(7)   | 5(5)     | -7(5)    |
| O(1S)  | 46(2)    | 40(2)    | 22(1)    | -2(1)    | 12(1)    | 3(1)     |

---

Table S11. Hydrogen coordinates ( $\times 10^4$ ) and isotropic displacement parameters ( $\text{\AA}^2 \times 10^{-3}$ ) for CCDC # 982544.

|        | x        | y        | z         | U(eq)  |
|--------|----------|----------|-----------|--------|
| H(3A)  | 2836(11) | 4000(70) | 8711(13)  | 35(10) |
| H(3B)  | 2622(8)  | 2610(50) | 9302(19)  | 28(9)  |
| H(1)   | 3266     | 9927     | 11442     | 34     |
| H(2)   | 3486     | 10652    | 10234     | 31     |
| H(5A)  | 3373     | 9830     | 8776      | 27     |
| H(5B)  | 3146     | 7239     | 8420      | 27     |
| H(7)   | 3672     | 4171     | 7392      | 43     |
| H(8)   | 3871     | 5163     | 6182      | 50     |
| H(9)   | 4288     | 8672     | 6103      | 48     |
| H(10)  | 4505     | 11277    | 7241      | 50     |
| H(11)  | 4301     | 10340    | 8452      | 42     |
| H(1SA) | 5364     | 6164     | 9855      | 43     |
| H(1SB) | 4917     | 7381     | 9584      | 43     |
| H(1SC) | 4654     | 3302     | 9844      | 66     |
| H(1SD) | 5120     | 2352     | 10099     | 66     |
| H(1S)  | 2785(12) | 5820(80) | 12033(18) | 62(14) |
| H(1SE) | 2670(30) | 7340(60) | 12620(40) | 93     |
| H(1SF) | 2550(30) | 4080(90) | 12380(50) | 93     |

Table S12. Hydrogen bonds for CCDC # 982544 [ $\text{\AA}$  and  $^\circ$ ].

| D-H...A               | d(D-H)    | d(H...A)  | d(D...A) | $\angle$ (DHA) |
|-----------------------|-----------|-----------|----------|----------------|
| N(3)-H(3A)...O(1S)#2  | 0.872(18) | 2.09(2)   | 2.912(3) | 157(3)         |
| N(3)-H(3B)...N(2)#3   | 0.887(18) | 2.164(19) | 3.051(4) | 178(3)         |
| O(1S)-H(1S)...N(1)    | 0.895(19) | 1.86(2)   | 2.734(3) | 166(4)         |
| O(1S)-H(1SE)...N(3)#4 | 0.91(2)   | 2.68(8)   | 2.912(3) | 96(5)          |

|                        |         |         |          |        |
|------------------------|---------|---------|----------|--------|
| O(1S)-H(1SE)...O(1S)#5 | 0.91(2) | 2.06(6) | 2.839(2) | 143(9) |
| O(1S)-H(1SF)...O(1S)#6 | 0.90(2) | 1.96(2) | 2.839(2) | 164(7) |

---

Symmetry transformations used to generate equivalent atoms:

#1  $-x+1, -y+1, -z+2$     #2  $x, -y+1, z-1/2$     #3  $-x+1/2, -y+1/2, -z+2$   
#4  $x, -y+1, z+1/2$     #5  $-x+1/2, y+1/2, -z+5/2$     #6  $-x+1/2, y-1/2, -z+5/2$
